# Supplementary material for: Synaptotagmin-7 Is an Asynchronous Calcium Sensor for Synaptic Transmission in Neurons Expressing SNAP-23
Source: PLoS One. 2014 Nov 25;9(11):e114033. doi: 10.1371/journal.pone.0114033 (PMC4244210; doi:10.1371/journal.pone.0114033)
Supplement: Data Set S1 — The data (single cell values) used to calculate means and SEMs. (XLSX) [file pone.0114033.s001.xlsx]

## Sheet: Figure 2
EPSCs
Snap25 + Syt7				Snap25 - Syt7				Snap23 + Syt7				Snap23 - Syt7
EPSC	Charge	TimeToPeak		EPSC	Charge	TimeToPeak		EPSC	Charge	TimeToPeak		EPSC	Charge	TimeToPeak
-4.13188e-09	-3.41254e-11	0.00473		-4.4499e-09	-3.60358e-11	0.00347		-2.35705e-10	-1.6547e-11	0.02019		-1.00817e-10	-1.461e-11	0.35627
-4.46355e-09	-4.3485e-11	0.00405		-3.5075e-09	-2.15878e-11	0.00503		-4.59412e-10	-3.00095e-11	0.02377		-4.85715e-11	-1.16866e-11	0.36218
-5.985e-09	-3.4881e-11	0.00345		-1.6141e-09	-6.56412e-12	0.00517		-1.32826e-10	-7.54558e-12	0.02986		-7.7378e-11	-2.52093e-11	0.34296
-4.52445e-09	-2.5603e-10	0.00495		-2.5677e-09	-1.51703e-11	0.00477		-1.17857e-10	-6.56167e-12	0.03066		-6.10014e-11	-4.19652e-12	0.20455
-5.94597e-09	-7.47347e-11	0.00573		-4.1981e-09	-2.939e-11	0.00562		-1.45333e-10	-9.1834e-12	0.02206		-3.92462e-11	-6.57115e-12	0.22557
-4.75071e-09	-5.6078e-11	0.00688		-2.5314e-09	-1.09362e-11	0.00471		-6.42243e-10	-4.43552e-11	0.01905		-1.44655e-10	-7.97818e-12	0.19417
-5.40268e-09	-2.94811e-11	0.00588		-2.6079e-09	-1.49943e-11	0.00288		-3.41485e-10	-2.56917e-11	0.02842		-8.8611e-11	-3.4707e-11	0.20534
-5.68957e-09	-4.5373e-11	0.00642		-5.0486e-09	-4.56093e-11	0.00632		-2.95226e-10	-2.39247e-11	0.02353		-5.63637e-11	-2.16722e-11	0.3122
-3.48641e-09	-2.86558e-11	0.00432		-5.9218e-09	-2.06674e-10	0.0039		-1.93233e-10	-1.57192e-11	0.02035		-1.23973e-10	-1.62492e-11	0.23581
-4.446e-09	-5.56648e-11	0.00413		-5.2883e-09	-5.19917e-11	0.0075		-1.12228e-10	-4.37034e-12	0.04288		-1.01693e-10	-7.14368e-12	0.19228
-4.33943e-09	-4.42338e-11	0.00423		-5.1431e-09	-6.66633e-11	0.00395		-2.43334e-10	-1.7336e-11	0.01635		-4.41122e-11	-9.0419e-12	0.21144
-5.61662e-09	-2.9151e-11	0.0074		-4.6032e-09	-4.07155e-11	0.00478		-1.34048e-10	-8.59505e-12	0.02615		-1.48988e-10	-9.11183e-12	0.24304
-6.08095e-09	-3.2691e-11	0.00392		-6.7457e-09	-2.35515e-10	0.01255		-8.93322e-11	-3.91987e-12	0.0169		-1.4497e-10	-1.4319e-11	0.20169
-1.04541e-09	-5.31985e-11	0.0046		-5.3754e-09	-1.09015e-10	0.00411		-1.6822e-10	-1.18391e-11	0.02407		-3.62142e-11	-1.29595e-11	0.32726
-6.85065e-09	-3.59935e-11	0.00375		-5.34352e-09	-7.26073e-11	0.0041		-1.4058e-10	-8.93955e-12	0.03102		-7.86847e-11	-6.35205e-12	0.29542
-6.48615e-09	-2.78203e-11	0.0035		-4.2884e-09	-3.14558e-11	0.00448		-1.73622e-10	-1.36477e-11	0.02527		-5.54257e-11	-5.23792e-12	0.2452
-3.66925e-09	-1.86438e-10	0.00402		-3.03277e-09	-2.05278e-11	0.0074		-1.39868e-10	-8.86212e-12	0.02359		-1.41665e-10	-3.429e-12	0.17066
-4.16813e-09	-1.27182e-10	0.00438		-4.64858e-09	-4.43752e-11	0.00395		-1.24623e-10	-7.26363e-12	0.02829		-1.20163e-10	-3.4652e-12	0.18042
-4.40139e-09	-3.18e-11	0.00481		-5.55239e-09	-1.54273e-10	0.00515		-6.52869e-10	-4.82774e-11	0.03561		-2.55e-10	-8.3398e-12	0.20358
-7.81198e-09	-4.18391e-11	0.00364		-3.75614e-09	-2.4259e-11	0.005		-1.72708e-10	-1.22508e-11	0.03553		-5.8125e-11	-8.18282e-12	0.26658
-2.51083e-09	-6.61982e-11	0.00386		-3.72779e-09	-2.6711e-11	0.00413		-5.76943e-11	-3.9151e-12	0.01095		-9.00801e-11	-7.53493e-12	0.20628
-4.10638e-09	-8.68633e-11	0.00314		-4.56988e-09	-3.89943e-11	0.00425		-5.06879e-10	-3.02102e-11	0.17104		-6.5375e-11	-1.5305e-11	0.15312
-3.77124e-09	-3.89878e-11	0.00501		-4.6732e-09	-4.18755e-11	0.00455						-4.3125e-11	-1.2154e-11	0.27645
-6.47862e-09	-3.32323e-11	0.00455		-3.8599e-09	-3.17375e-11	0.00537
-8.20948e-09	-5.10724e-11	0.00616
-1.83415e-09	-1.05112e-10	0.00308
-3.64572e-09	-9.03138e-12	0.00715
-9.746e-10	-3.0964e-11	0.00332
-2.26492e-09	-2.01534e-11	0.00353
-3.24068e-09	-2.68335e-11	0.0041
-5.05902e-09	-3.79006e-11	0.00347
-3.19776e-09	-3.06428e-11	0.00448
-1.55178e-09	-1.10144e-11	0.00656
mEPSCs
Snap25 + Syt7			Snap25 - Syt7			Snap23 + Syt7			Snap23 - Syt7
Amplitudes	Frequencies		Amplitudes	Frequencies		Amplitudes	Frequencies		Amplitudes	Frequencies
28.9487	0.95		32.0277	0.43333		34.6311	17.6167		18.6882	3.58333
27.699	0.7		21.7231	1.63333		19.1097	5.16667		15.5547	11.4
26.7286	0.28333		37.6512	0.43333		35.0125	6.53333		74.9363	44.4667
32.9888	2.43333		33.6388	0.53333		38.1804	5.96667		14.4661	27.8
30.6791	0.68333		37.1538	3.5		24.2944	8.25		17.4901	18.6
32.9355	0.35		21.3155	1.08333		16.7516	5.78333		16.6136	22.7167
27.1231	0.46667		16.7686	1.5		20.0524	11.4333		17.9876	17.5167
34.0841	0.68333		34.8054	1.91304		21.6538	6.86667		61.0944	6.05
32.1082	2.76667		18.8579	1.22917		19.3645	11.9		15.7284	37.8667
30.2325	1.91667		32.2187	1.65		28.7493	15.3833		14.7909	59.2333
33.8902	0.85		17.3961	1.15		38.7586	4.28333		18.692	12.0667
30.991	0.95		22.4663	0.63333		20.9825	8.81667		15.7304	20.3167
27.7612	5.8		20.1914	0.85		37.2111	14.2167		20.8264	6.33333
32.4373	3.76667		35.4557	0.53333		27.6259	15.4667		67.8742	44.9167
33.2545	0.65		34.2563	0.68333		18.5203	8.85		14.6567	12.4333
25.9367	2.8		31.4907	2.5		23.6847	18.6833		18.7584	13.45
32.5307	0.35		38.5582	0.21667		37.2448	17.3167		49.0776	21.3167
30.2914	0.31667		21.9589	1.91667		22.9239	16.3167		15.6567	30.6
			16.03	1.01667		26.3762	13.2833		55.2145	43.9667
			39.8104	2.93333		23.6565	18.25		49.0776	31.3
			33.7286	0.25		39.7204	9.83333		15.5995	26.5833
									12.7584	23.3667
									20.9767	3.43333

## Sheet: Figure 3
Snap25 + Syt7 -- trains
1	-7.22211e-10	-2.95676e-09	-3.83952e-09	-6.81666e-09	-5.90523e-09	-1.75021e-09	-2.05666e-09	-7.33022e-09	-1.31875e-09	-5.01031e-09	-2.55748e-09	-2.36094e-09	-1.00606e-08	-4.94187e-09	-1.94475e-09	-4.63951e-09	-5.34998e-09	-4.08329e-09	-1.77312e-09	-4.18498e-09
2	-1.14927e-09	-5.95039e-09	-7.50655e-09	-1.23127e-08	-9.90983e-09	-3.40698e-09	-3.97395e-09	-1.01617e-08	-2.23063e-09	-9.34281e-09	-4.91839e-09	-4.12656e-09	-1.63619e-08	-8.92187e-09	-3.17419e-09	-8.96901e-09	-9.79466e-09	-6.9847e-09	-3.67938e-09	-7.23059e-09
3	-1.69491e-09	-8.55309e-09	-1.10189e-08	-1.66318e-08	-1.29344e-08	-5.30501e-09	-5.36374e-09	-1.40813e-08	-2.69557e-09	-1.21628e-08	-7.11274e-09	-5.64031e-09	-2.07619e-08	-1.29228e-08	-3.9805e-09	-1.1991e-08	-1.33212e-08	-9.07454e-09	-5.22594e-09	-9.63432e-09
4	-2.00666e-09	-1.10623e-08	-1.41478e-08	-2.01326e-08	-1.52584e-08	-7.43241e-09	-6.56666e-09	-1.56053e-08	-3.15475e-09	-1.54566e-08	-9.09178e-09	-6.97812e-09	-2.42881e-08	-1.59634e-08	-4.58806e-09	-1.43808e-08	-1.59584e-08	-1.09653e-08	-6.53e-09	-1.1434e-08
5	-2.19137e-09	-1.33204e-08	-1.70832e-08	-2.28414e-08	-1.71943e-08	-9.10449e-09	-7.47551e-09	-1.78792e-08	-3.57131e-09	-1.7785e-08	-1.04464e-08	-8.23594e-09	-2.75431e-08	-1.88184e-08	-5.14e-09	-1.63007e-08	-1.79696e-08	-1.25442e-08	-7.96656e-09	-1.29299e-08
6	-2.44717e-09	-1.56318e-08	-1.94262e-08	-2.51312e-08	-1.86832e-08	-1.04416e-08	-8.2928e-09	-1.89484e-08	-3.98203e-09	-1.96997e-08	-1.15874e-08	-9.80969e-09	-3.00581e-08	-2.16906e-08	-5.69225e-09	-1.81117e-08	-1.96783e-08	-1.38278e-08	-9.21812e-09	-1.41671e-08
7	-2.80641e-09	-1.78067e-08	-2.15782e-08	-2.72013e-08	-1.98794e-08	-1.16823e-08	-9.08477e-09	-2.08411e-08	-4.40663e-09	-2.13622e-08	-1.23842e-08	-1.08756e-08	-3.22644e-08	-2.39897e-08	-6.14231e-09	-1.95466e-08	-2.11243e-08	-1.51827e-08	-1.04297e-08	-1.51736e-08
8	-3.04894e-09	-1.98156e-08	-2.32831e-08	-2.89679e-08	-2.08787e-08	-1.29004e-08	-9.88456e-09	-2.16495e-08	-4.80971e-09	-2.30181e-08	-1.32911e-08	-1.2095e-08	-3.39562e-08	-2.61903e-08	-6.63206e-09	-2.10754e-08	-2.23621e-08	-1.64428e-08	-1.15419e-08	-1.59933e-08
9	-3.38443e-09	-2.1688e-08	-2.48466e-08	-3.06037e-08	-2.17495e-08	-1.4015e-08	-1.05519e-08	-2.30503e-08	-5.19284e-09	-2.42638e-08	-1.39029e-08	-1.33916e-08	-3.53631e-08	-2.82825e-08	-6.95744e-09	-2.23271e-08	-2.3488e-08	-1.74168e-08	-1.26588e-08	-1.67223e-08
10	-3.65004e-09	-2.36932e-08	-2.62812e-08	-3.19709e-08	-2.25744e-08	-1.51385e-08	-1.12364e-08	-2.38952e-08	-5.5903e-09	-2.53862e-08	-1.46351e-08	-1.41522e-08	-3.66844e-08	-3.03416e-08	-7.35062e-09	-2.33385e-08	-2.4452e-08	-1.83613e-08	-1.37322e-08	-1.73451e-08
11	-3.86147e-09	-2.55247e-08	-2.76241e-08	-3.3256e-08	-2.33619e-08	-1.61243e-08	-1.20925e-08	-2.51967e-08	-5.96584e-09	-2.66537e-08	-1.53732e-08	-1.51259e-08	-3.77375e-08	-3.22722e-08	-7.68413e-09	-2.44205e-08	-2.5297e-08	-1.92918e-08	-1.47916e-08	-1.79335e-08
12	-4.19118e-09	-2.73023e-08	-2.88074e-08	-3.44977e-08	-2.4156e-08	-1.72146e-08	-1.28137e-08	-2.59259e-08	-6.34403e-09	-2.7545e-08	-1.59909e-08	-1.58953e-08	-3.88237e-08	-3.40428e-08	-8.07888e-09	-2.53835e-08	-2.60117e-08	-1.99822e-08	-1.57925e-08	-1.85213e-08
13	-4.4513e-09	-2.87866e-08	-2.96397e-08	-3.56947e-08	-2.49312e-08	-1.81202e-08	-1.36188e-08	-2.66599e-08	-6.75684e-09	-2.88062e-08	-1.67568e-08	-1.66347e-08	-3.96519e-08	-3.565e-08	-8.393e-09	-2.62236e-08	-2.67823e-08	-2.05936e-08	-1.67044e-08	-1.91125e-08
14	-4.62687e-09	-3.02509e-08	-3.06689e-08	-3.69404e-08	-2.5635e-08	-1.89765e-08	-1.4288e-08	-2.79326e-08	-7.1603e-09	-2.96647e-08	-1.73196e-08	-1.71988e-08	-4.05975e-08	-3.71375e-08	-8.66189e-09	-2.71028e-08	-2.74504e-08	-2.11813e-08	-1.764e-08	-1.96629e-08
15	-4.8319e-09	-3.19229e-08	-3.16144e-08	-3.80664e-08	-2.63636e-08	-1.98832e-08	-1.50075e-08	-2.8778e-08	-7.50387e-09	-3.08044e-08	-1.79627e-08	-1.77728e-08	-4.15103e-08	-3.85069e-08	-8.92496e-09	-2.79989e-08	-2.81871e-08	-2.1693e-08	-1.84916e-08	-2.01704e-08
16	-5.07442e-09	-3.31806e-08	-3.24835e-08	-3.91403e-08	-2.71575e-08	-2.07199e-08	-1.57437e-08	-2.97826e-08	-7.84332e-09	-3.16328e-08	-1.85155e-08	-1.82822e-08	-4.24903e-08	-3.97694e-08	-9.24127e-09	-2.87584e-08	-2.88593e-08	-2.22271e-08	-1.92728e-08	-2.06929e-08
17	-5.31397e-09	-3.43589e-08	-3.36289e-08	-4.01331e-08	-2.79037e-08	-2.14444e-08	-1.6452e-08	-3.04695e-08	-8.24301e-09	-3.27056e-08	-1.90536e-08	-1.87562e-08	-4.3374e-08	-4.09734e-08	-9.47414e-09	-2.95238e-08	-2.95977e-08	-2.28017e-08	-2.00306e-08	-2.12494e-08
18	-5.52053e-09	-3.55254e-08	-3.43919e-08	-4.10921e-08	-2.87198e-08	-2.22021e-08	-1.72522e-08	-3.14735e-08	-8.59476e-09	-3.35572e-08	-1.96995e-08	-1.92019e-08	-4.42178e-08	-4.20559e-08	-9.69186e-09	-3.0233e-08	-3.03174e-08	-2.32334e-08	-2.08081e-08	-2.17539e-08
19	-5.65229e-09	-3.67425e-08	-3.53427e-08	-4.19681e-08	-2.95221e-08	-2.29259e-08	-1.79805e-08	-3.22738e-08	-8.88927e-09	-3.46275e-08	-2.0314e-08	-1.96331e-08	-4.50104e-08	-4.31872e-08	-9.9273e-09	-3.10035e-08	-3.09839e-08	-2.3677e-08	-2.15638e-08	-2.22395e-08
20	-5.84965e-09	-3.79033e-08	-3.61716e-08	-4.28234e-08	-3.02627e-08	-2.37333e-08	-1.878e-08	-3.28723e-08	-9.19575e-09	-3.54531e-08	-2.08872e-08	-2.0125e-08	-4.59022e-08	-4.43597e-08	-1.01839e-08	-3.1828e-08	-3.16964e-08	-2.4105e-08	-2.22522e-08	-2.27274e-08
21	-6.0339e-09	-3.88897e-08	-3.72077e-08	-4.37494e-08	-3.09701e-08	-2.44566e-08	-1.96552e-08	-3.35263e-08	-9.49825e-09	-3.61819e-08	-2.14894e-08	-2.04847e-08	-4.68272e-08	-4.54097e-08	-1.03936e-08	-3.25353e-08	-3.24098e-08	-2.45983e-08	-2.29831e-08	-2.31486e-08
22	-6.28227e-09	-3.98418e-08	-3.79912e-08	-4.45858e-08	-3.17121e-08	-2.50807e-08	-2.04968e-08	-3.47515e-08	-9.79488e-09	-3.69749e-08	-2.20434e-08	-2.08904e-08	-4.77667e-08	-4.653e-08	-1.06153e-08	-3.32123e-08	-3.31343e-08	-2.51611e-08	-2.37766e-08	-2.36265e-08
23	-6.54854e-09	-4.07154e-08	-3.89173e-08	-4.55196e-08	-3.25734e-08	-2.57975e-08	-2.12723e-08	-3.54342e-08	-1.00838e-08	-3.77271e-08	-2.26167e-08	-2.12863e-08	-4.85547e-08	-4.72953e-08	-1.08501e-08	-3.38897e-08	-3.3823e-08	-2.56597e-08	-2.45628e-08	-2.40718e-08
24	-6.7187e-09	-4.15906e-08	-3.961e-08	-4.63302e-08	-3.33464e-08	-2.6384e-08	-2.2085e-08	-3.64094e-08	-1.03688e-08	-3.84315e-08	-2.32648e-08	-2.16834e-08	-4.93207e-08	-4.82975e-08	-1.1072e-08	-3.45639e-08	-3.4532e-08	-2.61504e-08	-2.53075e-08	-2.44963e-08
25	-6.87921e-09	-4.23877e-08	-4.02514e-08	-4.71508e-08	-3.41757e-08	-2.70462e-08	-2.28641e-08	-3.70929e-08	-1.06634e-08	-3.8974e-08	-2.37697e-08	-2.21128e-08	-5.00426e-08	-4.91231e-08	-1.12996e-08	-3.52396e-08	-3.52554e-08	-2.6628e-08	-2.60438e-08	-2.49144e-08
26	-7.04077e-09	-4.32779e-08	-4.08259e-08	-4.79881e-08	-3.50109e-08	-2.76699e-08	-2.36352e-08	-3.81343e-08	-1.09534e-08	-3.95502e-08	-2.44683e-08	-2.25212e-08	-5.08962e-08	-5.00188e-08	-1.14889e-08	-3.58815e-08	-3.59745e-08	-2.70613e-08	-2.67641e-08	-2.53464e-08
27	-7.23276e-09	-4.43503e-08	-4.13439e-08	-4.88503e-08	-3.57377e-08	-2.8216e-08	-2.43715e-08	-3.89151e-08	-1.12577e-08	-4.01621e-08	-2.50093e-08	-2.29653e-08	-5.16911e-08	-5.09603e-08	-1.16802e-08	-3.65749e-08	-3.6573e-08	-2.74565e-08	-2.74956e-08	-2.57574e-08
28	-7.43122e-09	-4.52405e-08	-4.19769e-08	-4.968e-08	-3.64447e-08	-2.88064e-08	-2.51335e-08	-3.94531e-08	-1.1528e-08	-4.08421e-08	-2.55199e-08	-2.34435e-08	-5.25399e-08	-5.18744e-08	-1.18827e-08	-3.72025e-08	-3.72361e-08	-2.79537e-08	-2.81509e-08	-2.61403e-08
29	-7.73265e-09	-4.6191e-08	-4.25233e-08	-5.05016e-08	-3.72543e-08	-2.94242e-08	-2.59368e-08	-4.03883e-08	-1.1794e-08	-4.15393e-08	-2.60455e-08	-2.38094e-08	-5.33456e-08	-5.27481e-08	-1.20741e-08	-3.78505e-08	-3.79079e-08	-2.84711e-08	-2.89047e-08	-2.65875e-08
30	-7.85549e-09	-4.70049e-08	-4.30547e-08	-5.1301e-08	-3.79428e-08	-3.00207e-08	-2.66332e-08	-4.10484e-08	-1.20389e-08	-4.20836e-08	-2.66696e-08	-2.41205e-08	-5.4101e-08	-5.34428e-08	-1.23061e-08	-3.85069e-08	-3.84923e-08	-2.88998e-08	-2.96134e-08	-2.69616e-08
31	-8.01085e-09	-4.79564e-08	-4.35673e-08	-5.2183e-08	-3.88231e-08	-3.06511e-08	-2.74655e-08	-4.17229e-08	-1.23062e-08	-4.27217e-08	-2.73652e-08	-2.44915e-08	-5.49286e-08	-5.42997e-08	-1.25341e-08	-3.91623e-08	-3.91992e-08	-2.9319e-08	-3.03216e-08	-2.74094e-08
32	-8.22587e-09	-4.88228e-08	-4.4168e-08	-5.30128e-08	-3.94462e-08	-3.11921e-08	-2.81537e-08	-4.22445e-08	-1.25755e-08	-4.33848e-08	-2.78374e-08	-2.48215e-08	-5.58342e-08	-5.50191e-08	-1.27041e-08	-3.98198e-08	-3.98087e-08	-2.97083e-08	-3.09913e-08	-2.78211e-08
33	-8.43949e-09	-4.96208e-08	-4.47835e-08	-5.37469e-08	-4.01823e-08	-3.18135e-08	-2.89994e-08	-4.27515e-08	-1.28218e-08	-4.39548e-08	-2.83845e-08	-2.52093e-08	-5.65517e-08	-5.59119e-08	-1.2927e-08	-4.03978e-08	-4.04405e-08	-3.01016e-08	-3.17384e-08	-2.82201e-08
34	-8.63483e-09	-5.03963e-08	-4.53217e-08	-5.45648e-08	-4.09516e-08	-3.24087e-08	-2.98107e-08	-4.32855e-08	-1.30669e-08	-4.44501e-08	-2.89484e-08	-2.55791e-08	-5.73086e-08	-5.65569e-08	-1.31021e-08	-4.10274e-08	-4.1088e-08	-3.04464e-08	-3.24792e-08	-2.85885e-08
35	-8.78438e-09	-5.11984e-08	-4.57554e-08	-5.54397e-08	-4.17369e-08	-3.29805e-08	-3.05215e-08	-4.37397e-08	-1.33094e-08	-4.49461e-08	-2.95048e-08	-2.59126e-08	-5.82249e-08	-5.73372e-08	-1.3285e-08	-4.16216e-08	-4.16747e-08	-3.07941e-08	-3.31933e-08	-2.90135e-08
36	-8.95653e-09	-5.19536e-08	-4.61639e-08	-5.6242e-08	-4.23798e-08	-3.35226e-08	-3.13235e-08	-4.41404e-08	-1.3604e-08	-4.54511e-08	-3.00166e-08	-2.62328e-08	-5.89013e-08	-5.80053e-08	-1.34946e-08	-4.22309e-08	-4.23968e-08	-3.11583e-08	-3.38692e-08	-2.94064e-08
37	-9.17405e-09	-5.27754e-08	-4.65663e-08	-5.70143e-08	-4.30751e-08	-3.40645e-08	-3.20923e-08	-4.45437e-08	-1.38799e-08	-4.58898e-08	-3.0615e-08	-2.65293e-08	-5.9682e-08	-5.8755e-08	-1.36903e-08	-4.28913e-08	-4.30799e-08	-3.15426e-08	-3.46045e-08	-2.97904e-08
38	-9.3771e-09	-5.34471e-08	-4.70821e-08	-5.78355e-08	-4.36226e-08	-3.46247e-08	-3.2887e-08	-4.49829e-08	-1.41089e-08	-4.63623e-08	-3.11385e-08	-2.68628e-08	-6.03439e-08	-5.94028e-08	-1.3924e-08	-4.34922e-08	-4.37231e-08	-3.19474e-08	-3.52875e-08	-3.01368e-08
39	-9.54282e-09	-5.42389e-08	-4.75116e-08	-5.86513e-08	-4.42675e-08	-3.51765e-08	-3.35436e-08	-4.53557e-08	-1.43423e-08	-4.69448e-08	-3.15573e-08	-2.73515e-08	-6.10534e-08	-6.01453e-08	-1.40726e-08	-4.40861e-08	-4.42843e-08	-3.23441e-08	-3.60178e-08	-3.04834e-08
40	-9.76486e-09	-5.48981e-08	-4.79022e-08	-5.94045e-08	-4.49052e-08	-3.57794e-08	-3.42741e-08	-4.57447e-08	-1.46164e-08	-4.74733e-08	-3.19832e-08	-2.77794e-08	-6.17153e-08	-6.08875e-08	-1.42505e-08	-4.47646e-08	-4.48394e-08	-3.26629e-08	-3.66691e-08	-3.08078e-08
41	-9.92192e-09	-5.57518e-08	-4.83483e-08	-6.01484e-08	-4.56505e-08	-3.62015e-08	-3.501e-08	-4.61018e-08	-1.4858e-08	-4.79317e-08	-3.24604e-08	-2.81335e-08	-6.24371e-08	-6.15497e-08	-1.44043e-08	-4.53828e-08	-4.54328e-08	-3.30465e-08	-3.72754e-08	-3.11931e-08
42	-1.01189e-08	-5.65157e-08	-4.8719e-08	-6.08904e-08	-4.63528e-08	-3.6725e-08	-3.57736e-08	-4.80839e-08	-1.50896e-08	-4.84064e-08	-3.30206e-08	-2.85072e-08	-6.32196e-08	-6.22875e-08	-1.4585e-08	-4.60245e-08	-4.59708e-08	-3.33995e-08	-3.79764e-08	-3.14856e-08
43	-1.02425e-08	-5.73765e-08	-4.91001e-08	-6.16076e-08	-4.69482e-08	-3.72042e-08	-3.65172e-08	-4.86771e-08	-1.53296e-08	-4.88986e-08	-3.35274e-08	-2.88354e-08	-6.38078e-08	-6.29997e-08	-1.47578e-08	-4.65616e-08	-4.65896e-08	-3.37781e-08	-3.86736e-08	-3.18218e-08
44	-1.05135e-08	-5.81387e-08	-4.94822e-08	-6.24902e-08	-4.75655e-08	-3.76952e-08	-3.72822e-08	-4.90815e-08	-1.55684e-08	-4.93439e-08	-3.40026e-08	-2.91351e-08	-6.45035e-08	-6.36906e-08	-1.49486e-08	-4.71479e-08	-4.7219e-08	-3.41499e-08	-3.92714e-08	-3.21598e-08
45	-1.06901e-08	-5.89367e-08	-4.99427e-08	-6.31447e-08	-4.81386e-08	-3.82506e-08	-3.80362e-08	-4.94468e-08	-1.57709e-08	-4.98289e-08	-3.44738e-08	-2.94464e-08	-6.50562e-08	-6.44028e-08	-1.51003e-08	-4.77237e-08	-4.77378e-08	-3.44429e-08	-3.99067e-08	-3.24698e-08
46	-1.08839e-08	-5.95326e-08	-5.03033e-08	-6.39546e-08	-4.87641e-08	-3.87689e-08	-3.86977e-08	-4.9846e-08	-1.59785e-08	-5.02659e-08	-3.50666e-08	-2.97169e-08	-6.57759e-08	-6.50037e-08	-1.52761e-08	-4.83018e-08	-4.8328e-08	-3.48346e-08	-4.05319e-08	-3.27566e-08
47	-1.11071e-08	-6.03037e-08	-5.06351e-08	-6.46756e-08	-4.9344e-08	-3.93321e-08	-3.94351e-08	-5.01617e-08	-1.62076e-08	-5.07177e-08	-3.575e-08	-3.00404e-08	-6.65177e-08	-6.56462e-08	-1.54424e-08	-4.88682e-08	-4.89001e-08	-3.5206e-08	-4.11957e-08	-3.30447e-08
48	-1.13119e-08	-6.09711e-08	-5.10796e-08	-6.53553e-08	-4.98816e-08	-3.9855e-08	-4.01393e-08	-5.05216e-08	-1.64087e-08	-5.11555e-08	-3.61532e-08	-3.0346e-08	-6.71175e-08	-6.62938e-08	-1.56217e-08	-4.94355e-08	-4.94373e-08	-3.5564e-08	-4.1809e-08	-3.33659e-08
49	-1.15275e-08	-6.16725e-08	-5.1536e-08	-6.61476e-08	-5.04402e-08	-4.03211e-08	-4.08897e-08	-5.18499e-08	-1.66356e-08	-5.16324e-08	-3.6615e-08	-3.06332e-08	-6.79044e-08	-6.70778e-08	-1.58008e-08	-5.00553e-08	-5.00354e-08	-3.58957e-08	-4.24037e-08	-3.36431e-08
50	-1.17068e-08	-6.23487e-08	-5.19217e-08	-6.68128e-08	-5.10703e-08	-4.08091e-08	-4.16376e-08	-5.2428e-08	-1.68502e-08	-5.21962e-08	-3.71829e-08	-3.08755e-08	-6.85464e-08	-6.78025e-08	-1.59437e-08	-5.05297e-08	-5.06304e-08	-3.63404e-08	-4.30108e-08	-3.39738e-08
51	-1.18837e-08	-6.30173e-08	-5.24561e-08	-6.75074e-08	-5.16576e-08	-4.12353e-08	-4.22774e-08	-5.28193e-08	-1.70518e-08	-5.25716e-08	-3.75912e-08	-3.11846e-08	-6.91952e-08	-6.84931e-08	-1.61157e-08	-5.10705e-08	-5.12483e-08	-3.67777e-08	-4.35471e-08	-3.4275e-08
52	-1.21185e-08	-6.36712e-08	-5.28124e-08	-6.80512e-08	-5.2298e-08	-4.17139e-08	-4.29302e-08	-5.31572e-08	-1.72408e-08	-5.30041e-08	-3.80425e-08	-3.14788e-08	-6.9871e-08	-6.915e-08	-1.6259e-08	-5.16421e-08	-5.18893e-08	-3.70575e-08	-4.4165e-08	-3.45627e-08
53	-1.23142e-08	-6.43449e-08	-5.32285e-08	-6.87519e-08	-5.28542e-08	-4.21574e-08	-4.36506e-08	-5.35637e-08	-1.74345e-08	-5.33798e-08	-3.84781e-08	-3.18188e-08	-7.04778e-08	-6.97659e-08	-1.6426e-08	-5.22198e-08	-5.24574e-08	-3.73483e-08	-4.47306e-08	-3.48074e-08
54	-1.24656e-08	-6.50872e-08	-5.36509e-08	-6.94268e-08	-5.34525e-08	-4.25911e-08	-4.43535e-08	-5.38803e-08	-1.76836e-08	-5.3776e-08	-3.88923e-08	-3.22022e-08	-7.12177e-08	-7.03606e-08	-1.65988e-08	-5.26924e-08	-5.30111e-08	-3.7666e-08	-4.52828e-08	-3.5117e-08
55	-1.25871e-08	-6.57212e-08	-5.40181e-08	-7.0151e-08	-5.39783e-08	-4.29904e-08	-4.50574e-08	-5.42188e-08	-1.78865e-08	-5.42007e-08	-3.93385e-08	-3.25256e-08	-7.19776e-08	-7.0993e-08	-1.67573e-08	-5.32332e-08	-5.35725e-08	-3.80562e-08	-4.58278e-08	-3.54211e-08
56	-1.26723e-08	-6.63126e-08	-5.43714e-08	-7.07898e-08	-5.45447e-08	-4.34251e-08	-4.57187e-08	-5.45458e-08	-1.80873e-08	-5.45348e-08	-3.96813e-08	-3.27943e-08	-7.25922e-08	-7.17883e-08	-1.68915e-08	-5.37768e-08	-5.41434e-08	-3.8431e-08	-4.63648e-08	-3.56825e-08
57	-1.28072e-08	-6.70494e-08	-5.48278e-08	-7.15102e-08	-5.50552e-08	-4.38431e-08	-4.63108e-08	-5.49054e-08	-1.82779e-08	-5.49541e-08	-4.0121e-08	-3.30296e-08	-7.31972e-08	-7.23386e-08	-1.70553e-08	-5.4335e-08	-5.4665e-08	-3.88184e-08	-4.69088e-08	-3.59496e-08
58	-1.29605e-08	-6.7843e-08	-5.51227e-08	-7.2099e-08	-5.55908e-08	-4.43563e-08	-4.69935e-08	-5.52456e-08	-1.8473e-08	-5.53991e-08	-4.05757e-08	-3.33531e-08	-7.38005e-08	-7.29648e-08	-1.72051e-08	-5.48589e-08	-5.52265e-08	-3.91322e-08	-4.74835e-08	-3.62257e-08
59	-1.31407e-08	-6.84626e-08	-5.54439e-08	-7.27678e-08	-5.61889e-08	-4.4784e-08	-4.76022e-08	-5.55499e-08	-1.87075e-08	-5.58216e-08	-4.0981e-08	-3.36596e-08	-7.44065e-08	-7.35646e-08	-1.73898e-08	-5.53762e-08	-5.57131e-08	-3.94371e-08	-4.80098e-08	-3.64938e-08
60	-1.32945e-08	-6.92334e-08	-5.57613e-08	-7.33387e-08	-5.67394e-08	-4.52664e-08	-4.82611e-08	-5.578e-08	-1.89797e-08	-5.61275e-08	-4.14958e-08	-3.39639e-08	-7.51115e-08	-7.43827e-08	-1.7521e-08	-5.59632e-08	-5.62603e-08	-3.98881e-08	-4.85527e-08	-3.67535e-08
61	-1.34341e-08	-6.98061e-08	-5.60702e-08	-7.39617e-08	-5.72715e-08	-4.56807e-08	-4.90134e-08	-5.60683e-08	-1.92025e-08	-5.64384e-08	-4.20082e-08	-3.42546e-08	-7.57708e-08	-7.50367e-08	-1.76611e-08	-5.64905e-08	-5.68518e-08	-4.01867e-08	-4.90537e-08	-3.70972e-08
62	-1.35664e-08	-7.04829e-08	-5.64164e-08	-7.45533e-08	-5.77187e-08	-4.61623e-08	-4.96542e-08	-5.63936e-08	-1.94188e-08	-5.67984e-08	-4.243e-08	-3.45711e-08	-7.64611e-08	-7.57561e-08	-1.78224e-08	-5.69503e-08	-5.73659e-08	-4.04331e-08	-4.95308e-08	-3.7378e-08
63	-1.37039e-08	-7.11187e-08	-5.66806e-08	-7.5131e-08	-5.81725e-08	-4.65411e-08	-5.02742e-08	-5.66797e-08	-1.96335e-08	-5.725e-08	-4.28136e-08	-3.48947e-08	-7.71092e-08	-7.63789e-08	-1.79403e-08	-5.74281e-08	-5.79307e-08	-4.08302e-08	-5.00161e-08	-3.76576e-08
64	-1.3873e-08	-7.16339e-08	-5.70133e-08	-7.56928e-08	-5.86993e-08	-4.69128e-08	-5.0824e-08	-5.69767e-08	-1.98336e-08	-5.76121e-08	-4.32344e-08	-3.52291e-08	-7.77211e-08	-7.70636e-08	-1.80825e-08	-5.79493e-08	-5.84721e-08	-4.11197e-08	-5.05031e-08	-3.78918e-08
65	-1.40698e-08	-7.23419e-08	-5.7235e-08	-7.63325e-08	-5.91717e-08	-4.72848e-08	-5.14801e-08	-5.72994e-08	-2.01005e-08	-5.79406e-08	-4.36582e-08	-3.55091e-08	-7.83936e-08	-7.77383e-08	-1.82132e-08	-5.8411e-08	-5.90614e-08	-4.13917e-08	-5.10118e-08	-3.8143e-08
66	-1.41843e-08	-7.29672e-08	-5.76193e-08	-7.68315e-08	-5.96532e-08	-4.77364e-08	-5.21215e-08	-5.76124e-08	-2.02954e-08	-5.82787e-08	-4.40634e-08	-3.57754e-08	-7.8954e-08	-7.83646e-08	-1.8358e-08	-5.88893e-08	-5.95398e-08	-4.17059e-08	-5.14745e-08	-3.84187e-08
67	-1.43463e-08	-7.36152e-08	-5.79585e-08	-7.73981e-08	-6.01697e-08	-4.8121e-08	-5.2734e-08	-5.79389e-08	-2.04763e-08	-5.87576e-08	-4.45399e-08	-3.60823e-08	-7.95927e-08	-7.89186e-08	-1.84836e-08	-5.93907e-08	-6.01092e-08	-4.19061e-08	-5.19764e-08	-3.86546e-08
68	-1.45292e-08	-7.43017e-08	-5.81896e-08	-7.79551e-08	-6.06572e-08	-4.85218e-08	-5.33862e-08	-5.82048e-08	-2.06469e-08	-5.90016e-08	-4.49099e-08	-3.63489e-08	-8.01651e-08	-7.96614e-08	-1.86012e-08	-5.99099e-08	-6.06804e-08	-4.21616e-08	-5.24694e-08	-3.8849e-08
69	-1.46431e-08	-7.495e-08	-5.85023e-08	-7.84917e-08	-6.11552e-08	-4.90045e-08	-5.38987e-08	-5.84257e-08	-2.0839e-08	-5.93557e-08	-4.53596e-08	-3.66089e-08	-8.08295e-08	-8.03452e-08	-1.8715e-08	-6.03706e-08	-6.1107e-08	-4.25702e-08	-5.29291e-08	-3.90693e-08
70	-1.47652e-08	-7.54945e-08	-5.88337e-08	-7.89929e-08	-6.15722e-08	-4.9406e-08	-5.44653e-08	-5.87517e-08	-2.10644e-08	-5.96729e-08	-4.57452e-08	-3.68854e-08	-8.14857e-08	-8.08671e-08	-1.88853e-08	-6.08398e-08	-6.16181e-08	-4.29694e-08	-5.34105e-08	-3.92783e-08
71	-1.4955e-08	-7.61757e-08	-5.91119e-08	-7.95483e-08	-6.20404e-08	-4.98362e-08	-5.50442e-08	-5.9019e-08	-2.1238e-08	-6.0031e-08	-4.61814e-08	-3.7172e-08	-8.21035e-08	-8.15071e-08	-1.89873e-08	-6.13021e-08	-6.21383e-08	-4.3208e-08	-5.39162e-08	-3.95398e-08
72	-1.51144e-08	-7.67859e-08	-5.94336e-08	-8.01302e-08	-6.24059e-08	-5.02406e-08	-5.57446e-08	-5.92446e-08	-2.14473e-08	-6.03791e-08	-4.65002e-08	-3.74617e-08	-8.26835e-08	-8.20733e-08	-1.90773e-08	-6.1751e-08	-6.26951e-08	-4.34893e-08	-5.4381e-08	-3.97258e-08
73	-1.52251e-08	-7.72882e-08	-5.98472e-08	-8.05829e-08	-6.28514e-08	-5.07358e-08	-5.63264e-08	-5.94604e-08	-2.1617e-08	-6.06569e-08	-4.69942e-08	-3.78139e-08	-8.32541e-08	-8.28399e-08	-1.92146e-08	-6.21517e-08	-6.32123e-08	-4.3696e-08	-5.48332e-08	-4.00126e-08
74	-1.53605e-08	-7.79534e-08	-6.01438e-08	-8.10678e-08	-6.3354e-08	-5.11629e-08	-5.69059e-08	-6.15644e-08	-2.18024e-08	-6.10641e-08	-4.74114e-08	-3.80869e-08	-8.39078e-08	-8.34258e-08	-1.93375e-08	-6.25762e-08	-6.37023e-08	-4.39149e-08	-5.53059e-08	-4.02443e-08
75	-1.55477e-08	-7.85218e-08	-6.03797e-08	-8.15493e-08	-6.38034e-08	-5.15191e-08	-5.75322e-08	-6.20746e-08	-2.19894e-08	-6.13648e-08	-4.77147e-08	-3.83977e-08	-8.43802e-08	-8.40928e-08	-1.94751e-08	-6.30392e-08	-6.41693e-08	-4.41297e-08	-5.57869e-08	-4.04927e-08
76	-1.56282e-08	-7.90092e-08	-6.0693e-08	-8.21269e-08	-6.42154e-08	-5.19969e-08	-5.81417e-08	-6.23794e-08	-2.21581e-08	-6.17109e-08	-4.80377e-08	-3.87173e-08	-8.49203e-08	-8.4709e-08	-1.96151e-08	-6.34487e-08	-6.46803e-08	-4.43352e-08	-5.62265e-08	-4.07188e-08
77	-1.57509e-08	-7.96451e-08	-6.10069e-08	-8.25779e-08	-6.47141e-08	-5.2382e-08	-5.87373e-08	-6.2669e-08	-2.23363e-08	-6.20084e-08	-4.84274e-08	-3.89333e-08	-8.54428e-08	-8.5319e-08	-1.97696e-08	-6.39197e-08	-6.52243e-08	-4.46538e-08	-5.66915e-08	-4.09348e-08
78	-1.5935e-08	-8.01749e-08	-6.12156e-08	-8.30527e-08	-6.51656e-08	-5.28616e-08	-5.93797e-08	-6.2918e-08	-2.25088e-08	-6.2329e-08	-4.88278e-08	-3.91595e-08	-8.60648e-08	-8.58388e-08	-1.98687e-08	-6.43701e-08	-6.56387e-08	-4.48449e-08	-5.71138e-08	-4.11814e-08
79	-1.60731e-08	-8.07686e-08	-6.14745e-08	-8.36128e-08	-6.55846e-08	-5.33087e-08	-5.98708e-08	-6.3099e-08	-2.26838e-08	-6.25978e-08	-4.93347e-08	-3.93864e-08	-8.66886e-08	-8.63741e-08	-1.9968e-08	-6.4788e-08	-6.61215e-08	-4.51332e-08	-5.75516e-08	-4.1397e-08
80	-1.62271e-08	-8.13222e-08	-6.1659e-08	-8.4019e-08	-6.60356e-08	-5.37353e-08	-6.0433e-08	-6.33449e-08	-2.28557e-08	-6.28334e-08	-4.97497e-08	-3.97016e-08	-8.72108e-08	-8.69303e-08	-2.00815e-08	-6.52046e-08	-6.65352e-08	-4.53061e-08	-5.79873e-08	-4.16066e-08
81	-1.63506e-08	-8.19184e-08	-6.19214e-08	-8.45253e-08	-6.63595e-08	-5.41552e-08	-6.09459e-08	-6.35795e-08	-2.30213e-08	-6.31753e-08	-5.00968e-08	-3.99429e-08	-8.77683e-08	-8.76688e-08	-2.01928e-08	-6.56807e-08	-6.69465e-08	-4.56171e-08	-5.84477e-08	-4.17794e-08
82	-1.64716e-08	-8.25576e-08	-6.21276e-08	-8.49892e-08	-6.68641e-08	-5.44979e-08	-6.1484e-08	-6.37603e-08	-2.32222e-08	-6.35506e-08	-5.04928e-08	-4.01862e-08	-8.82439e-08	-8.83335e-08	-2.0277e-08	-6.60444e-08	-6.749e-08	-4.58244e-08	-5.88802e-08	-4.20061e-08
83	-1.65661e-08	-8.31425e-08	-6.22978e-08	-8.54295e-08	-6.7276e-08	-5.49081e-08	-6.20579e-08	-6.40479e-08	-2.33907e-08	-6.37646e-08	-5.08908e-08	-4.04668e-08	-8.87659e-08	-8.89063e-08	-2.0382e-08	-6.65226e-08	-6.80041e-08	-4.59768e-08	-5.93165e-08	-4.22304e-08
84	-1.66424e-08	-8.3694e-08	-6.25362e-08	-8.58724e-08	-6.77693e-08	-5.53565e-08	-6.27005e-08	-6.4307e-08	-2.35607e-08	-6.40302e-08	-5.12336e-08	-4.07998e-08	-8.95149e-08	-8.96606e-08	-2.05089e-08	-6.69918e-08	-6.84685e-08	-4.62044e-08	-5.97212e-08	-4.24247e-08
85	-1.67624e-08	-8.43926e-08	-6.26851e-08	-8.6391e-08	-6.81867e-08	-5.57807e-08	-6.32234e-08	-6.44872e-08	-2.37492e-08	-6.4225e-08	-5.16708e-08	-4.10348e-08	-9.00443e-08	-9.02763e-08	-2.06536e-08	-6.739e-08	-6.89997e-08	-4.64821e-08	-6.01234e-08	-4.26118e-08
86	-1.68537e-08	-8.48899e-08	-6.28671e-08	-8.68873e-08	-6.85792e-08	-5.61478e-08	-6.38107e-08	-6.47035e-08	-2.39498e-08	-6.45109e-08	-5.20944e-08	-4.12988e-08	-9.05879e-08	-9.08974e-08	-2.0794e-08	-6.77852e-08	-6.948e-08	-4.67434e-08	-6.05286e-08	-4.28415e-08
87	-1.69601e-08	-8.55538e-08	-6.31204e-08	-8.73057e-08	-6.90258e-08	-5.65418e-08	-6.43608e-08	-6.4916e-08	-2.41079e-08	-6.4747e-08	-5.2444e-08	-4.16008e-08	-9.1056e-08	-9.16002e-08	-2.09175e-08	-6.81734e-08	-6.99364e-08	-4.70211e-08	-6.09614e-08	-4.30453e-08
88	-1.70552e-08	-8.61306e-08	-6.32693e-08	-8.77087e-08	-6.94535e-08	-5.69056e-08	-6.49499e-08	-6.51188e-08	-2.43243e-08	-6.50318e-08	-5.28468e-08	-4.18345e-08	-9.15667e-08	-9.21773e-08	-2.10626e-08	-6.85932e-08	-7.05042e-08	-4.73319e-08	-6.13566e-08	-4.32873e-08
89	-1.71555e-08	-8.66805e-08	-6.35163e-08	-8.81034e-08	-6.98743e-08	-5.73428e-08	-6.53745e-08	-6.5329e-08	-2.45005e-08	-6.52462e-08	-5.30866e-08	-4.20498e-08	-9.21517e-08	-9.28555e-08	-2.11889e-08	-6.89434e-08	-7.09913e-08	-4.74901e-08	-6.17473e-08	-4.34663e-08
90	-1.73055e-08	-8.72413e-08	-6.3796e-08	-8.85165e-08	-7.01587e-08	-5.77346e-08	-6.59037e-08	-6.55605e-08	-2.46689e-08	-6.54811e-08	-5.34613e-08	-4.22981e-08	-9.25654e-08	-9.34429e-08	-2.13127e-08	-6.93486e-08	-7.14513e-08	-4.77109e-08	-6.22013e-08	-4.36355e-08
91	-1.74644e-08	-8.78431e-08	-6.40319e-08	-8.90021e-08	-7.04837e-08	-5.81325e-08	-6.63674e-08	-6.57581e-08	-2.4829e-08	-6.56835e-08	-5.38181e-08	-4.2558e-08	-9.30878e-08	-9.41229e-08	-2.14522e-08	-6.97369e-08	-7.18934e-08	-4.78998e-08	-6.25832e-08	-4.3807e-08
92	-1.75968e-08	-8.83492e-08	-6.41949e-08	-8.94899e-08	-7.08137e-08	-5.85507e-08	-6.6863e-08	-6.59542e-08	-2.49987e-08	-6.59607e-08	-5.41349e-08	-4.27961e-08	-9.35931e-08	-9.47411e-08	-2.15757e-08	-7.01561e-08	-7.23434e-08	-4.81112e-08	-6.29345e-08	-4.3962e-08
93	-1.7728e-08	-8.89531e-08	-6.4375e-08	-8.98522e-08	-7.11264e-08	-5.89285e-08	-6.74387e-08	-6.61182e-08	-2.51618e-08	-6.62101e-08	-5.45115e-08	-4.31464e-08	-9.39837e-08	-9.52598e-08	-2.16917e-08	-7.05081e-08	-7.28124e-08	-4.83392e-08	-6.33007e-08	-4.41382e-08
94	-1.78272e-08	-8.95748e-08	-6.4484e-08	-9.01772e-08	-7.14037e-08	-5.9301e-08	-6.78747e-08	-6.62826e-08	-2.53345e-08	-6.64013e-08	-5.4934e-08	-4.33449e-08	-9.4555e-08	-9.58573e-08	-2.18239e-08	-7.09064e-08	-7.32424e-08	-4.84992e-08	-6.36666e-08	-4.43181e-08
95	-1.80327e-08	-9.02303e-08	-6.47603e-08	-9.06052e-08	-7.16778e-08	-5.97548e-08	-6.84818e-08	-6.64785e-08	-2.54853e-08	-6.66447e-08	-5.53007e-08	-4.35927e-08	-9.50106e-08	-9.64429e-08	-2.19676e-08	-7.13033e-08	-7.3653e-08	-4.87975e-08	-6.40757e-08	-4.45034e-08
96	-1.82048e-08	-9.07549e-08	-6.49161e-08	-9.10356e-08	-7.22114e-08	-6.01421e-08	-6.89579e-08	-6.667e-08	-2.56304e-08	-6.69516e-08	-5.56518e-08	-4.38621e-08	-9.55324e-08	-9.70292e-08	-2.2132e-08	-7.17282e-08	-7.40814e-08	-4.90631e-08	-6.44482e-08	-4.4685e-08
97	-1.835e-08	-9.13157e-08	-6.51791e-08	-9.14213e-08	-7.2611e-08	-6.05043e-08	-6.94715e-08	-6.68152e-08	-2.5802e-08	-6.7121e-08	-5.59227e-08	-4.40987e-08	-9.60011e-08	-9.76333e-08	-2.22586e-08	-7.21124e-08	-7.45695e-08	-4.93142e-08	-6.48001e-08	-4.48753e-08
98	-1.84251e-08	-9.18494e-08	-6.52603e-08	-9.17527e-08	-7.28963e-08	-6.08969e-08	-6.99237e-08	-6.69333e-08	-2.59707e-08	-6.72982e-08	-5.64036e-08	-4.43837e-08	-9.6624e-08	-9.82064e-08	-2.24222e-08	-7.24404e-08	-7.4949e-08	-4.95966e-08	-6.51784e-08	-4.50256e-08
99	-1.85023e-08	-9.23283e-08	-6.5456e-08	-9.22118e-08	-7.3227e-08	-6.1282e-08	-7.04553e-08	-6.71063e-08	-2.61435e-08	-6.76211e-08	-5.66747e-08	-4.45568e-08	-9.70977e-08	-9.88258e-08	-2.25472e-08	-7.28505e-08	-7.53304e-08	-4.9934e-08	-6.55084e-08	-4.52105e-08
100	-1.85898e-08	-9.28619e-08	-6.55706e-08	-9.26103e-08	-7.3546e-08	-6.17083e-08	-7.09223e-08	-6.72897e-08	-2.62998e-08	-6.81305e-08	-5.70212e-08	-4.47266e-08	-9.75724e-08	-9.93795e-08	-2.26931e-08	-7.32366e-08	-7.57295e-08	-5.00826e-08	-6.58805e-08	-4.53281e-08
Snap25 - Syt7 -- trains
1	-1.45538e-09	-1.66977e-09	-1.03997e-09	-8.16869e-11	-4.35187e-10	-6.64168e-10	-7.34094e-10	-4.40427e-09	-1.69032e-08	-2.11673e-09	-4.40427e-09	-5.13381e-09	-1.2418e-09	-1.89874e-08	-3.24055e-09	-2.52819e-09
2	-2.23313e-09	-2.71906e-09	-1.85916e-09	-1.97465e-10	-8.5025e-10	-1.18423e-09	-1.41623e-09	-8.01658e-09	-3.44913e-08	-3.84155e-09	-8.01658e-09	-8.34014e-09	-1.81421e-09	-3.14542e-08	-5.39045e-09	-4.75031e-09
3	-2.82675e-09	-3.51052e-09	-2.44194e-09	-3.55146e-10	-1.25413e-09	-1.83865e-09	-2.26733e-09	-1.08282e-08	-4.9362e-08	-5.67822e-09	-1.08282e-08	-1.04171e-08	-2.35036e-09	-4.09098e-08	-6.81722e-09	-6.58887e-09
4	-3.3655e-09	-4.20196e-09	-2.8808e-09	-5.18168e-10	-1.67238e-09	-2.46491e-09	-3.10895e-09	-1.30548e-08	-5.71015e-08	-6.95766e-09	-1.30548e-08	-1.20838e-08	-2.80398e-09	-4.81293e-08	-8.10178e-09	-8.26886e-09
5	-3.76212e-09	-4.87386e-09	-3.25888e-09	-7.13719e-10	-2.08319e-09	-2.95066e-09	-3.8258e-09	-1.49828e-08	-6.24884e-08	-8.08708e-09	-1.49828e-08	-1.35386e-08	-3.22947e-09	-5.46375e-08	-9.12725e-09	-9.78528e-09
6	-4.18644e-09	-5.5098e-09	-3.67092e-09	-9.08361e-10	-2.49344e-09	-3.51905e-09	-4.57381e-09	-1.66361e-08	-6.68554e-08	-9.25427e-09	-1.66361e-08	-1.48497e-08	-3.61493e-09	-6.0299e-08	-1.02258e-08	-1.12591e-08
7	-4.4725e-09	-6.10964e-09	-4.05899e-09	-1.11084e-09	-2.91325e-09	-4.20522e-09	-5.12484e-09	-1.79763e-08	-7.11405e-08	-1.02308e-08	-1.79763e-08	-1.61307e-08	-3.91851e-09	-6.51431e-08	-1.104e-08	-1.26234e-08
8	-4.79525e-09	-6.66758e-09	-4.45672e-09	-1.32242e-09	-3.32531e-09	-4.85276e-09	-5.70328e-09	-1.91198e-08	-7.50024e-08	-1.1097e-08	-1.91198e-08	-1.72134e-08	-4.20551e-09	-6.95823e-08	-1.18186e-08	-1.38385e-08
9	-5.08887e-09	-7.21894e-09	-4.8379e-09	-1.54402e-09	-3.74594e-09	-5.53387e-09	-6.26037e-09	-2.0022e-08	-7.85207e-08	-1.19741e-08	-2.0022e-08	-1.82936e-08	-4.49718e-09	-7.35402e-08	-1.2604e-08	-1.50685e-08
10	-5.38131e-09	-7.71125e-09	-5.21038e-09	-1.76784e-09	-4.16247e-09	-6.1862e-09	-6.73427e-09	-2.08855e-08	-8.20589e-08	-1.28915e-08	-2.08855e-08	-1.92894e-08	-4.77587e-09	-7.69789e-08	-1.33878e-08	-1.61311e-08
11	-5.67713e-09	-8.21758e-09	-5.62483e-09	-1.99418e-09	-4.58391e-09	-6.75256e-09	-7.22239e-09	-2.16984e-08	-8.51578e-08	-1.37885e-08	-2.16984e-08	-2.02262e-08	-5.03251e-09	-8.02933e-08	-1.41991e-08	-1.71296e-08
12	-5.99238e-09	-8.78343e-09	-5.97654e-09	-2.22712e-09	-5.00688e-09	-7.28905e-09	-7.65137e-09	-2.24415e-08	-8.81723e-08	-1.43627e-08	-2.24415e-08	-2.11004e-08	-5.3371e-09	-8.32084e-08	-1.49722e-08	-1.80155e-08
13	-6.28913e-09	-9.28707e-09	-6.31848e-09	-2.47665e-09	-5.42857e-09	-7.7855e-09	-8.0743e-09	-2.31987e-08	-9.07512e-08	-1.49221e-08	-2.31987e-08	-2.19532e-08	-5.60214e-09	-8.59861e-08	-1.5791e-08	-1.89134e-08
14	-6.6098e-09	-9.78329e-09	-6.66539e-09	-2.72152e-09	-5.85095e-09	-8.35928e-09	-8.46285e-09	-2.39002e-08	-9.3622e-08	-1.55326e-08	-2.39002e-08	-2.26775e-08	-5.86538e-09	-8.86101e-08	-1.66029e-08	-1.97908e-08
15	-6.88217e-09	-1.02932e-08	-7.00107e-09	-2.97204e-09	-6.29701e-09	-8.83943e-09	-8.90403e-09	-2.45751e-08	-9.6754e-08	-1.60439e-08	-2.45751e-08	-2.34553e-08	-6.12507e-09	-9.0973e-08	-1.74145e-08	-2.0506e-08
16	-7.16496e-09	-1.08069e-08	-7.32739e-09	-3.22791e-09	-6.72025e-09	-9.24939e-09	-9.30566e-09	-2.52305e-08	-9.96598e-08	-1.66357e-08	-2.52305e-08	-2.42202e-08	-6.40961e-09	-9.34896e-08	-1.81955e-08	-2.12457e-08
17	-7.45902e-09	-1.13103e-08	-7.6704e-09	-3.49599e-09	-7.15156e-09	-9.62932e-09	-9.69446e-09	-2.58356e-08	-1.02446e-07	-1.72385e-08	-2.58356e-08	-2.49646e-08	-6.67739e-09	-9.60102e-08	-1.89827e-08	-2.19231e-08
18	-7.72386e-09	-1.1812e-08	-8.03082e-09	-3.7466e-09	-7.57499e-09	-1.00163e-08	-1.00827e-08	-2.64165e-08	-1.05488e-07	-1.78381e-08	-2.64165e-08	-2.55921e-08	-6.95616e-09	-9.83838e-08	-1.9762e-08	-2.25701e-08
19	-8.01942e-09	-1.22956e-08	-8.33804e-09	-4.0088e-09	-7.99692e-09	-1.03878e-08	-1.04669e-08	-2.69654e-08	-1.08377e-07	-1.84446e-08	-2.69654e-08	-2.62743e-08	-7.25953e-09	-1.00621e-07	-2.05535e-08	-2.32157e-08
20	-8.29798e-09	-1.27843e-08	-8.64539e-09	-4.2782e-09	-8.41002e-09	-1.07403e-08	-1.08414e-08	-2.75342e-08	-1.11229e-07	-1.89123e-08	-2.75342e-08	-2.69187e-08	-7.50542e-09	-1.02858e-07	-2.12931e-08	-2.38678e-08
21	-8.55916e-09	-1.32507e-08	-8.98291e-09	-4.54015e-09	-8.8299e-09	-1.11277e-08	-1.12345e-08	-2.80697e-08	-1.13912e-07	-1.95287e-08	-2.80697e-08	-2.75856e-08	-7.76282e-09	-1.05092e-07	-2.20868e-08	-2.44338e-08
22	-8.8267e-09	-1.37258e-08	-9.2785e-09	-4.81328e-09	-9.26292e-09	-1.14813e-08	-1.16349e-08	-2.85595e-08	-1.1635e-07	-2.01828e-08	-2.85595e-08	-2.82037e-08	-8.00576e-09	-1.07159e-07	-2.28094e-08	-2.50607e-08
23	-9.08108e-09	-1.41832e-08	-9.61147e-09	-5.08622e-09	-9.67173e-09	-1.18345e-08	-1.19788e-08	-2.90467e-08	-1.1883e-07	-2.07768e-08	-2.90467e-08	-2.88082e-08	-8.23532e-09	-1.09401e-07	-2.35767e-08	-2.56458e-08
24	-9.34075e-09	-1.46519e-08	-9.95463e-09	-5.35572e-09	-1.00831e-08	-1.21801e-08	-1.23252e-08	-2.95526e-08	-1.21113e-07	-2.13556e-08	-2.95526e-08	-2.93729e-08	-8.47101e-09	-1.11533e-07	-2.43469e-08	-2.62349e-08
25	-9.59712e-09	-1.51185e-08	-1.02595e-08	-5.6209e-09	-1.04845e-08	-1.25195e-08	-1.26848e-08	-3.00241e-08	-1.2337e-07	-2.19256e-08	-3.00241e-08	-3.0018e-08	-8.7146e-09	-1.13546e-07	-2.50976e-08	-2.6851e-08
26	-9.83374e-09	-1.55746e-08	-1.05396e-08	-5.88905e-09	-1.08835e-08	-1.28581e-08	-1.30542e-08	-3.0489e-08	-1.25456e-07	-2.25913e-08	-3.0489e-08	-3.05222e-08	-8.94006e-09	-1.15818e-07	-2.57743e-08	-2.74735e-08
27	-1.00917e-08	-1.60208e-08	-1.08328e-08	-6.16304e-09	-1.12638e-08	-1.31909e-08	-1.34393e-08	-3.09159e-08	-1.27643e-07	-2.31153e-08	-3.09159e-08	-3.10392e-08	-9.17987e-09	-1.18018e-07	-2.64603e-08	-2.8025e-08
28	-1.03198e-08	-1.64741e-08	-1.11108e-08	-6.42122e-09	-1.16392e-08	-1.35453e-08	-1.38441e-08	-3.12919e-08	-1.29831e-07	-2.35695e-08	-3.12919e-08	-3.1584e-08	-9.42018e-09	-1.20282e-07	-2.71723e-08	-2.85726e-08
29	-1.05429e-08	-1.69158e-08	-1.14086e-08	-6.67309e-09	-1.20197e-08	-1.38727e-08	-1.41664e-08	-3.17254e-08	-1.3217e-07	-2.40969e-08	-3.17254e-08	-3.2061e-08	-9.63089e-09	-1.2234e-07	-2.79105e-08	-2.90738e-08
30	-1.07711e-08	-1.73507e-08	-1.17243e-08	-6.93676e-09	-1.24027e-08	-1.42113e-08	-1.45216e-08	-3.21379e-08	-1.34412e-07	-2.45527e-08	-3.21379e-08	-3.2569e-08	-9.84521e-09	-1.24343e-07	-2.85842e-08	-2.96176e-08
31	-1.10151e-08	-1.77611e-08	-1.20529e-08	-7.18649e-09	-1.2788e-08	-1.45438e-08	-1.48497e-08	-3.25273e-08	-1.36911e-07	-2.50492e-08	-3.25273e-08	-3.30501e-08	-1.00709e-08	-1.26349e-07	-2.92517e-08	-3.01498e-08
32	-1.12526e-08	-1.81831e-08	-1.23426e-08	-7.44471e-09	-1.3168e-08	-1.48977e-08	-1.52251e-08	-3.29224e-08	-1.39088e-07	-2.55516e-08	-3.29224e-08	-3.35525e-08	-1.02926e-08	-1.28317e-07	-2.98863e-08	-3.06682e-08
33	-1.14746e-08	-1.86042e-08	-1.26678e-08	-7.70793e-09	-1.35361e-08	-1.52116e-08	-1.55851e-08	-3.3307e-08	-1.41365e-07	-2.59954e-08	-3.3307e-08	-3.41308e-08	-1.0542e-08	-1.30347e-07	-3.06016e-08	-3.12101e-08
34	-1.1697e-08	-1.90104e-08	-1.29384e-08	-7.94737e-09	-1.3897e-08	-1.55406e-08	-1.5965e-08	-3.36513e-08	-1.43396e-07	-2.64886e-08	-3.36513e-08	-3.46076e-08	-1.07349e-08	-1.32436e-07	-3.12581e-08	-3.17084e-08
35	-1.18914e-08	-1.94001e-08	-1.3231e-08	-8.1919e-09	-1.42485e-08	-1.58785e-08	-1.62918e-08	-3.40272e-08	-1.45676e-07	-2.7148e-08	-3.40272e-08	-3.50957e-08	-1.09739e-08	-1.34348e-07	-3.19149e-08	-3.22354e-08
36	-1.21002e-08	-1.98036e-08	-1.35217e-08	-8.44985e-09	-1.46048e-08	-1.6205e-08	-1.66236e-08	-3.43435e-08	-1.47701e-07	-2.7522e-08	-3.43435e-08	-3.55106e-08	-1.11706e-08	-1.36295e-07	-3.25434e-08	-3.27245e-08
37	-1.22982e-08	-2.01958e-08	-1.37943e-08	-8.71444e-09	-1.49411e-08	-1.65342e-08	-1.69733e-08	-3.46941e-08	-1.49921e-07	-2.80488e-08	-3.46941e-08	-3.60037e-08	-1.13602e-08	-1.3827e-07	-3.32002e-08	-3.33391e-08
38	-1.25025e-08	-2.05587e-08	-1.4056e-08	-8.9548e-09	-1.52749e-08	-1.68537e-08	-1.73001e-08	-3.50568e-08	-1.52162e-07	-2.8606e-08	-3.50568e-08	-3.64033e-08	-1.15528e-08	-1.40215e-07	-3.37818e-08	-3.38446e-08
39	-1.27065e-08	-2.09394e-08	-1.43187e-08	-9.18039e-09	-1.56122e-08	-1.71553e-08	-1.76305e-08	-3.53714e-08	-1.54395e-07	-2.90993e-08	-3.53714e-08	-3.68271e-08	-1.17559e-08	-1.41973e-07	-3.44854e-08	-3.43521e-08
40	-1.29022e-08	-2.1318e-08	-1.4612e-08	-9.41379e-09	-1.59373e-08	-1.74707e-08	-1.79339e-08	-3.56553e-08	-1.5648e-07	-2.97303e-08	-3.56553e-08	-3.72752e-08	-1.19606e-08	-1.44011e-07	-3.50966e-08	-3.48617e-08
41	-1.30944e-08	-2.17095e-08	-1.49092e-08	-9.63537e-09	-1.62572e-08	-1.77612e-08	-1.82094e-08	-3.60141e-08	-1.58469e-07	-3.01432e-08	-3.60141e-08	-3.7708e-08	-1.21411e-08	-1.45886e-07	-3.57155e-08	-3.5352e-08
42	-1.32807e-08	-2.20803e-08	-1.51766e-08	-9.85967e-09	-1.65794e-08	-1.80756e-08	-1.85365e-08	-3.63203e-08	-1.60369e-07	-3.06514e-08	-3.63203e-08	-3.81255e-08	-1.23329e-08	-1.47881e-07	-3.63507e-08	-3.58222e-08
43	-1.34665e-08	-2.24516e-08	-1.54414e-08	-1.00838e-08	-1.68962e-08	-1.83835e-08	-1.88518e-08	-3.66145e-08	-1.62416e-07	-3.11868e-08	-3.66145e-08	-3.86068e-08	-1.24962e-08	-1.49866e-07	-3.69799e-08	-3.62485e-08
44	-1.36389e-08	-2.2812e-08	-1.57118e-08	-1.02989e-08	-1.72088e-08	-1.87209e-08	-1.91953e-08	-3.69409e-08	-1.64495e-07	-3.15823e-08	-3.69409e-08	-3.90331e-08	-1.26849e-08	-1.51852e-07	-3.75712e-08	-3.67483e-08
45	-1.38188e-08	-2.31706e-08	-1.60034e-08	-1.05168e-08	-1.75102e-08	-1.90289e-08	-1.94605e-08	-3.72313e-08	-1.66513e-07	-3.20441e-08	-3.72313e-08	-3.94776e-08	-1.28581e-08	-1.53738e-07	-3.81685e-08	-3.72016e-08
46	-1.39808e-08	-2.35337e-08	-1.63089e-08	-1.0745e-08	-1.78108e-08	-1.93442e-08	-1.97309e-08	-3.75307e-08	-1.6839e-07	-3.25522e-08	-3.75307e-08	-3.99251e-08	-1.30225e-08	-1.55628e-07	-3.87333e-08	-3.76515e-08
47	-1.4147e-08	-2.38935e-08	-1.6641e-08	-1.09637e-08	-1.81159e-08	-1.96727e-08	-2.00021e-08	-3.77321e-08	-1.70402e-07	-3.30306e-08	-3.77321e-08	-4.03399e-08	-1.3191e-08	-1.5751e-07	-3.92568e-08	-3.81533e-08
48	-1.43178e-08	-2.42242e-08	-1.69478e-08	-1.11573e-08	-1.8413e-08	-1.99752e-08	-2.03034e-08	-3.79784e-08	-1.72423e-07	-3.35655e-08	-3.79784e-08	-4.08015e-08	-1.33458e-08	-1.59373e-07	-3.98153e-08	-3.86481e-08
49	-1.44792e-08	-2.45557e-08	-1.72743e-08	-1.13554e-08	-1.8712e-08	-2.029e-08	-2.0547e-08	-3.82462e-08	-1.74465e-07	-3.39944e-08	-3.82462e-08	-4.12388e-08	-1.34922e-08	-1.6123e-07	-4.03969e-08	-3.91702e-08
50	-1.46388e-08	-2.49009e-08	-1.75759e-08	-1.15605e-08	-1.90051e-08	-2.05925e-08	-2.07982e-08	-3.8547e-08	-1.76453e-07	-3.44002e-08	-3.8547e-08	-4.16415e-08	-1.36772e-08	-1.62929e-07	-4.09981e-08	-3.95847e-08
51	-1.48084e-08	-2.52447e-08	-1.7864e-08	-1.17496e-08	-1.93119e-08	-2.08794e-08	-2.10393e-08	-3.87872e-08	-1.78064e-07	-3.48469e-08	-3.87872e-08	-4.20754e-08	-1.38635e-08	-1.64724e-07	-4.15093e-08	-4.00647e-08
52	-1.49834e-08	-2.55669e-08	-1.81354e-08	-1.19384e-08	-1.962e-08	-2.11926e-08	-2.1305e-08	-3.90675e-08	-1.79765e-07	-3.51991e-08	-3.90675e-08	-4.2505e-08	-1.40063e-08	-1.66391e-07	-4.20481e-08	-4.05471e-08
53	-1.51614e-08	-2.5863e-08	-1.84332e-08	-1.21216e-08	-1.99115e-08	-2.1489e-08	-2.15597e-08	-3.93381e-08	-1.81371e-07	-3.58004e-08	-3.93381e-08	-4.28758e-08	-1.41856e-08	-1.68384e-07	-4.26033e-08	-4.10056e-08
54	-1.53059e-08	-2.6198e-08	-1.86701e-08	-1.23026e-08	-2.02041e-08	-2.18021e-08	-2.18301e-08	-3.95777e-08	-1.82943e-07	-3.64298e-08	-3.95777e-08	-4.33091e-08	-1.43325e-08	-1.70277e-07	-4.3104e-08	-4.14588e-08
55	-1.54615e-08	-2.64965e-08	-1.89232e-08	-1.24752e-08	-2.0487e-08	-2.20883e-08	-2.20506e-08	-3.97311e-08	-1.84588e-07	-3.68353e-08	-3.97311e-08	-4.37218e-08	-1.44853e-08	-1.72148e-07	-4.36311e-08	-4.19352e-08
56	-1.5618e-08	-2.67939e-08	-1.91555e-08	-1.26462e-08	-2.07722e-08	-2.2367e-08	-2.23071e-08	-3.99758e-08	-1.86138e-07	-3.73999e-08	-3.99758e-08	-4.41286e-08	-1.46295e-08	-1.73906e-07	-4.41696e-08	-4.23827e-08
57	-1.57965e-08	-2.709e-08	-1.94188e-08	-1.28204e-08	-2.10443e-08	-2.26845e-08	-2.25665e-08	-4.01772e-08	-1.87738e-07	-3.78551e-08	-4.01772e-08	-4.45041e-08	-1.47669e-08	-1.7559e-07	-4.47152e-08	-4.2796e-08
58	-1.59446e-08	-2.73839e-08	-1.96499e-08	-1.29933e-08	-2.13175e-08	-2.29627e-08	-2.28177e-08	-4.03714e-08	-1.89205e-07	-3.85597e-08	-4.03714e-08	-4.49098e-08	-1.49223e-08	-1.77366e-07	-4.51872e-08	-4.32868e-08
59	-1.60867e-08	-2.76778e-08	-1.98816e-08	-1.31708e-08	-2.15957e-08	-2.32525e-08	-2.30897e-08	-4.05144e-08	-1.90657e-07	-3.89696e-08	-4.05144e-08	-4.5331e-08	-1.50684e-08	-1.7911e-07	-4.56636e-08	-4.37326e-08
60	-1.62328e-08	-2.79762e-08	-2.0119e-08	-1.33263e-08	-2.18657e-08	-2.35564e-08	-2.33226e-08	-4.06911e-08	-1.92189e-07	-3.94869e-08	-4.06911e-08	-4.57699e-08	-1.52045e-08	-1.80841e-07	-4.61509e-08	-4.41286e-08
61	-1.63674e-08	-2.82807e-08	-2.03744e-08	-1.34831e-08	-2.21319e-08	-2.38224e-08	-2.35425e-08	-4.08875e-08	-1.93523e-07	-3.99135e-08	-4.08875e-08	-4.61674e-08	-1.5359e-08	-1.8258e-07	-4.65992e-08	-4.45583e-08
62	-1.65249e-08	-2.85781e-08	-2.06122e-08	-1.36397e-08	-2.23923e-08	-2.41374e-08	-2.38248e-08	-4.10504e-08	-1.95069e-07	-4.04117e-08	-4.10504e-08	-4.6548e-08	-1.55007e-08	-1.84256e-07	-4.71501e-08	-4.50071e-08
63	-1.66713e-08	-2.88719e-08	-2.08808e-08	-1.37881e-08	-2.26647e-08	-2.43938e-08	-2.40551e-08	-4.11618e-08	-1.96459e-07	-4.08511e-08	-4.11618e-08	-4.69086e-08	-1.56537e-08	-1.86015e-07	-4.76614e-08	-4.54612e-08
64	-1.68128e-08	-2.91229e-08	-2.10987e-08	-1.39533e-08	-2.29663e-08	-2.46583e-08	-2.42709e-08	-4.13242e-08	-1.97862e-07	-4.13227e-08	-4.13242e-08	-4.73011e-08	-1.57876e-08	-1.8764e-07	-4.8159e-08	-4.59124e-08
65	-1.69502e-08	-2.93894e-08	-2.13006e-08	-1.41059e-08	-2.32146e-08	-2.49422e-08	-2.44966e-08	-4.14602e-08	-1.9912e-07	-4.19602e-08	-4.14602e-08	-4.76852e-08	-1.59199e-08	-1.89277e-07	-4.86306e-08	-4.6315e-08
66	-1.70903e-08	-2.96405e-08	-2.1531e-08	-1.42523e-08	-2.34778e-08	-2.52024e-08	-2.47029e-08	-4.15904e-08	-2.00449e-07	-4.23635e-08	-4.15904e-08	-4.804e-08	-1.60456e-08	-1.90896e-07	-4.90537e-08	-4.67239e-08
67	-1.72201e-08	-2.99053e-08	-2.17345e-08	-1.43906e-08	-2.37256e-08	-2.54876e-08	-2.49269e-08	-4.17302e-08	-2.0168e-07	-4.29547e-08	-4.17302e-08	-4.83876e-08	-1.61885e-08	-1.92549e-07	-4.95312e-08	-4.711e-08
68	-1.73424e-08	-3.01689e-08	-2.19774e-08	-1.45289e-08	-2.39652e-08	-2.57584e-08	-2.51206e-08	-4.18977e-08	-2.02878e-07	-4.33821e-08	-4.18977e-08	-4.87676e-08	-1.6337e-08	-1.94142e-07	-5.00184e-08	-4.75107e-08
69	-1.74583e-08	-3.04428e-08	-2.21719e-08	-1.46813e-08	-2.42149e-08	-2.60216e-08	-2.53672e-08	-4.20381e-08	-2.04141e-07	-4.37391e-08	-4.20381e-08	-4.91198e-08	-1.64661e-08	-1.95905e-07	-5.04806e-08	-4.78937e-08
70	-1.76091e-08	-3.07032e-08	-2.23738e-08	-1.48185e-08	-2.44716e-08	-2.63289e-08	-2.55895e-08	-4.22117e-08	-2.05436e-07	-4.40895e-08	-4.22117e-08	-4.95045e-08	-1.6607e-08	-1.97481e-07	-5.09538e-08	-4.82625e-08
71	-1.77597e-08	-3.0958e-08	-2.26048e-08	-1.4964e-08	-2.47191e-08	-2.65857e-08	-2.58257e-08	-4.23583e-08	-2.06553e-07	-4.4494e-08	-4.23583e-08	-4.98796e-08	-1.67405e-08	-1.9913e-07	-5.14482e-08	-4.86215e-08
72	-1.78767e-08	-3.12257e-08	-2.28404e-08	-1.51032e-08	-2.4962e-08	-2.68434e-08	-2.6061e-08	-4.25452e-08	-2.07715e-07	-4.489e-08	-4.25452e-08	-5.02283e-08	-1.68812e-08	-2.00801e-07	-5.18996e-08	-4.90417e-08
73	-1.79892e-08	-3.14604e-08	-2.30677e-08	-1.52388e-08	-2.52071e-08	-2.7107e-08	-2.62966e-08	-4.26635e-08	-2.08842e-07	-4.52407e-08	-4.26635e-08	-5.06026e-08	-1.70227e-08	-2.02435e-07	-5.2347e-08	-4.94604e-08
74	-1.81013e-08	-3.16916e-08	-2.32997e-08	-1.5369e-08	-2.54467e-08	-2.73551e-08	-2.65069e-08	-4.27611e-08	-2.09824e-07	-4.5611e-08	-4.27611e-08	-5.09843e-08	-1.71497e-08	-2.0398e-07	-5.27965e-08	-4.98308e-08
75	-1.82031e-08	-3.19469e-08	-2.34819e-08	-1.54974e-08	-2.569e-08	-2.76038e-08	-2.6713e-08	-4.28342e-08	-2.10831e-07	-4.61291e-08	-4.28342e-08	-5.13598e-08	-1.7249e-08	-2.05579e-07	-5.32277e-08	-5.01108e-08
76	-1.83094e-08	-3.21827e-08	-2.36887e-08	-1.56301e-08	-2.59194e-08	-2.787e-08	-2.6945e-08	-4.29271e-08	-2.11863e-07	-4.66046e-08	-4.29271e-08	-5.17433e-08	-1.73643e-08	-2.07264e-07	-5.36681e-08	-5.0542e-08
77	-1.84264e-08	-3.24209e-08	-2.39048e-08	-1.57612e-08	-2.61533e-08	-2.81295e-08	-2.71619e-08	-4.30239e-08	-2.12784e-07	-4.69389e-08	-4.30239e-08	-5.21491e-08	-1.74589e-08	-2.08806e-07	-5.41076e-08	-5.09169e-08
78	-1.85352e-08	-3.26693e-08	-2.41258e-08	-1.58826e-08	-2.64349e-08	-2.83687e-08	-2.73683e-08	-4.31674e-08	-2.13741e-07	-4.72494e-08	-4.31674e-08	-5.25117e-08	-1.76059e-08	-2.10344e-07	-5.45208e-08	-5.12549e-08
79	-1.86721e-08	-3.28911e-08	-2.43372e-08	-1.6009e-08	-2.66769e-08	-2.86221e-08	-2.75896e-08	-4.32534e-08	-2.14701e-07	-4.77008e-08	-4.32534e-08	-5.28388e-08	-1.77302e-08	-2.11977e-07	-5.50081e-08	-5.1646e-08
80	-1.87894e-08	-3.31233e-08	-2.45575e-08	-1.61372e-08	-2.6912e-08	-2.88855e-08	-2.78013e-08	-4.33493e-08	-2.15709e-07	-4.81306e-08	-4.33493e-08	-5.31897e-08	-1.78567e-08	-2.13528e-07	-5.54304e-08	-5.19619e-08
81	-1.8905e-08	-3.33562e-08	-2.47554e-08	-1.62515e-08	-2.7136e-08	-2.91647e-08	-2.80243e-08	-4.345e-08	-2.16651e-07	-4.85172e-08	-4.345e-08	-5.35372e-08	-1.7961e-08	-2.15186e-07	-5.58511e-08	-5.2294e-08
82	-1.90161e-08	-3.35722e-08	-2.50053e-08	-1.63739e-08	-2.73617e-08	-2.94142e-08	-2.82638e-08	-4.35494e-08	-2.17657e-07	-4.8926e-08	-4.35494e-08	-5.38368e-08	-1.80885e-08	-2.16871e-07	-5.62208e-08	-5.26129e-08
83	-1.91207e-08	-3.37949e-08	-2.51942e-08	-1.6492e-08	-2.75858e-08	-2.96732e-08	-2.85154e-08	-4.36685e-08	-2.18522e-07	-4.93714e-08	-4.36685e-08	-5.42177e-08	-1.82059e-08	-2.18406e-07	-5.66258e-08	-5.29679e-08
84	-1.92502e-08	-3.40265e-08	-2.54347e-08	-1.66143e-08	-2.78117e-08	-2.99313e-08	-2.88014e-08	-4.3758e-08	-2.19482e-07	-4.97045e-08	-4.3758e-08	-5.45185e-08	-1.83275e-08	-2.19834e-07	-5.70106e-08	-5.33695e-08
85	-1.93445e-08	-3.42465e-08	-2.5615e-08	-1.67177e-08	-2.80265e-08	-3.01934e-08	-2.90197e-08	-4.38719e-08	-2.20478e-07	-5.00697e-08	-4.38719e-08	-5.48998e-08	-1.84291e-08	-2.2144e-07	-5.74097e-08	-5.37099e-08
86	-1.94656e-08	-3.44541e-08	-2.58316e-08	-1.68256e-08	-2.8248e-08	-3.04229e-08	-2.9236e-08	-4.39247e-08	-2.21325e-07	-5.04468e-08	-4.39247e-08	-5.52083e-08	-1.85251e-08	-2.22899e-07	-5.78086e-08	-5.40861e-08
87	-1.95733e-08	-3.46761e-08	-2.60682e-08	-1.69372e-08	-2.846e-08	-3.0621e-08	-2.94703e-08	-4.39272e-08	-2.22203e-07	-5.07139e-08	-4.39272e-08	-5.55537e-08	-1.86832e-08	-2.24382e-07	-5.82596e-08	-5.44115e-08
88	-1.96991e-08	-3.48909e-08	-2.62587e-08	-1.70533e-08	-2.86757e-08	-3.08646e-08	-2.96697e-08	-4.39463e-08	-2.23021e-07	-5.10066e-08	-4.39463e-08	-5.58399e-08	-1.87845e-08	-2.25859e-07	-5.86465e-08	-5.473e-08
89	-1.9811e-08	-3.51127e-08	-2.64732e-08	-1.71681e-08	-2.89153e-08	-3.11037e-08	-2.9882e-08	-4.3964e-08	-2.23898e-07	-5.13446e-08	-4.3964e-08	-5.61537e-08	-1.88961e-08	-2.27353e-07	-5.90399e-08	-5.51036e-08
90	-1.99123e-08	-3.53296e-08	-2.66477e-08	-1.72837e-08	-2.91314e-08	-3.13274e-08	-3.00663e-08	-4.40014e-08	-2.2471e-07	-5.16347e-08	-4.40014e-08	-5.65053e-08	-1.90082e-08	-2.28915e-07	-5.94646e-08	-5.54568e-08
91	-2.00243e-08	-3.5552e-08	-2.68473e-08	-1.73854e-08	-2.93524e-08	-3.15448e-08	-3.02496e-08	-4.40442e-08	-2.25522e-07	-5.18757e-08	-4.40442e-08	-5.68526e-08	-1.91138e-08	-2.30375e-07	-5.98392e-08	-5.58114e-08
92	-2.01342e-08	-3.57623e-08	-2.70332e-08	-1.74891e-08	-2.95751e-08	-3.17613e-08	-3.04256e-08	-4.4063e-08	-2.26468e-07	-5.21167e-08	-4.4063e-08	-5.71802e-08	-1.92103e-08	-2.3205e-07	-6.02693e-08	-5.61224e-08
93	-2.02289e-08	-3.59643e-08	-2.72189e-08	-1.75996e-08	-2.97797e-08	-3.19784e-08	-3.05725e-08	-4.40712e-08	-2.27166e-07	-5.23192e-08	-4.40712e-08	-5.74813e-08	-1.93124e-08	-2.33613e-07	-6.07351e-08	-5.64149e-08
94	-2.03262e-08	-3.61665e-08	-2.7388e-08	-1.76947e-08	-2.99899e-08	-3.21841e-08	-3.07233e-08	-4.40995e-08	-2.27911e-07	-5.26029e-08	-4.40995e-08	-5.77833e-08	-1.94068e-08	-2.35142e-07	-6.11486e-08	-5.67107e-08
95	-2.04112e-08	-3.63706e-08	-2.7556e-08	-1.78047e-08	-3.01969e-08	-3.2394e-08	-3.09112e-08	-4.4136e-08	-2.28567e-07	-5.2985e-08	-4.4136e-08	-5.80778e-08	-1.95335e-08	-2.36452e-07	-6.15672e-08	-5.70592e-08
96	-2.05095e-08	-3.65779e-08	-2.77216e-08	-1.79136e-08	-3.04166e-08	-3.2622e-08	-3.10666e-08	-4.41455e-08	-2.29301e-07	-5.32946e-08	-4.41455e-08	-5.83779e-08	-1.96503e-08	-2.37877e-07	-6.18656e-08	-5.73801e-08
97	-2.0609e-08	-3.67786e-08	-2.79075e-08	-1.80096e-08	-3.06252e-08	-3.28407e-08	-3.13056e-08	-4.41531e-08	-2.30104e-07	-5.35616e-08	-4.41531e-08	-5.87328e-08	-1.9744e-08	-2.39313e-07	-6.21764e-08	-5.77002e-08
98	-2.07104e-08	-3.69703e-08	-2.80822e-08	-1.81064e-08	-3.08431e-08	-3.3047e-08	-3.14743e-08	-4.41647e-08	-2.30913e-07	-5.37718e-08	-4.41647e-08	-5.90417e-08	-1.9846e-08	-2.40788e-07	-6.25196e-08	-5.80278e-08
99	-2.08213e-08	-3.71733e-08	-2.82304e-08	-1.82052e-08	-3.10513e-08	-3.32465e-08	-3.16537e-08	-4.41549e-08	-2.31597e-07	-5.40791e-08	-4.41549e-08	-5.93216e-08	-1.99537e-08	-2.42088e-07	-6.28825e-08	-5.83095e-08
100	-2.09206e-08	-3.73631e-08	-2.83787e-08	-1.82944e-08	-3.12575e-08	-3.34691e-08	-3.18328e-08	-4.41496e-08	-2.32295e-07	-5.43805e-08	-4.41496e-08	-5.96029e-08	-2.00567e-08	-2.43569e-07	-6.32152e-08	-5.85906e-08
Snap23 + Syt7 -- trains
1	-8.90979e-11	-9.06999e-11	-9.23833e-11	-2.89163e-10	-6.54597e-11	-1.67793e-10	-3.5469e-10	-1.85946e-10	-2.51364e-11	-4.4984e-10	-1.89166e-11	-7.13017e-11	-1.01549e-10	-5.97269e-11	-3.37318e-10	-6.21697e-11	-3.95627e-11	-1.83879e-11	-4.90344e-11	-4.41309e-10	-3.67758e-11
2	-1.83006e-10	-1.8621e-10	-1.53704e-10	-5.39973e-10	-2.50247e-10	-3.6361e-10	-7.2976e-10	-4.1556e-10	-9.36205e-11	-1.30908e-09	-7.71781e-11	-2.25042e-10	-1.93475e-10	-1.48563e-10	-7.73123e-10	-1.6378e-10	-3.05978e-11	-4.29157e-11	-1.14442e-10	-1.02998e-09	-8.58313e-11
3	-2.8587e-10	-2.90676e-10	-2.49623e-10	-8.32307e-10	-5.24071e-10	-6.30144e-10	-1.09758e-09	-6.44804e-10	-2.22955e-10	-2.2846e-09	-1.78853e-10	-4.03555e-10	-2.9283e-10	-2.68692e-10	-1.12973e-09	-3.52252e-10	-1.19987e-10	-7.21215e-11	-1.92324e-10	-1.73092e-09	-1.44243e-10
4	-3.88431e-10	-3.94839e-10	-3.16631e-10	-1.20518e-09	-8.03167e-10	-8.40112e-10	-1.45825e-09	-9.43353e-10	-3.62404e-10	-3.41079e-09	-2.50499e-10	-6.09199e-10	-3.96538e-10	-4.26261e-10	-1.4682e-09	-5.16608e-10	-2.13825e-10	-1.02973e-10	-2.74594e-10	-2.47134e-09	-2.05945e-10
5	-5.12561e-10	-5.20571e-10	-5.43839e-10	-1.46944e-09	-1.08034e-09	-1.14664e-09	-1.8095e-09	-1.19121e-09	-5.27494e-10	-4.70388e-09	-3.66793e-10	-8.22736e-10	-4.99637e-10	-5.45385e-10	-1.83286e-09	-7.31785e-10	-3.79002e-10	-1.3738e-10	-3.66347e-10	-3.29712e-09	-2.7476e-10
6	-6.38071e-10	-6.47683e-10	-6.30286e-10	-1.77323e-09	-1.41311e-09	-1.3991e-09	-2.18483e-09	-1.48342e-09	-6.74261e-10	-6.33878e-09	-5.65254e-10	-1.06651e-09	-6.03174e-10	-6.74711e-10	-2.13563e-09	-9.83577e-10	-5.88562e-10	-1.75001e-10	-4.6667e-10	-4.20003e-09	-3.50003e-10
7	-7.44718e-10	-7.55931e-10	-8.01388e-10	-2.04347e-09	-1.8171e-09	-1.62436e-09	-2.57608e-09	-1.80864e-09	-9.39954e-10	-8.15475e-09	-8.03063e-10	-1.28725e-09	-7.05642e-10	-8.01744e-10	-2.44113e-09	-1.20819e-09	-8.07172e-10	-2.15593e-10	-5.74913e-10	-5.17422e-09	-4.31185e-10
8	-8.63991e-10	-8.76807e-10	-9.35734e-10	-2.37598e-09	-2.43762e-09	-1.87952e-09	-2.99736e-09	-2.08285e-09	-1.1184e-09	-1.02423e-08	-1.03521e-09	-1.58364e-09	-8.03732e-10	-9.59314e-10	-2.7955e-09	-1.47137e-09	-1.18082e-09	-2.6206e-10	-6.98826e-10	-6.28944e-09	-5.2412e-10
9	-1.03878e-09	-1.0532e-09	-9.47823e-10	-2.76751e-09	-2.97934e-09	-2.2079e-09	-3.40737e-09	-2.41542e-09	-1.36579e-09	-1.21718e-08	-1.35327e-09	-1.89316e-09	-9.08068e-10	-1.10753e-09	-3.12061e-09	-1.74805e-09	-1.5816e-09	-3.09318e-10	-8.24847e-10	-7.42363e-09	-6.18636e-10
10	-1.22146e-09	-1.23748e-09	-1.00131e-09	-3.18778e-09	-3.60072e-09	-2.48888e-09	-3.78002e-09	-2.79512e-09	-1.50825e-09	-1.43003e-08	-1.62037e-09	-2.18832e-09	-1.00896e-09	-1.27928e-09	-3.43203e-09	-2.10984e-09	-2.15465e-09	-3.59667e-10	-9.59113e-10	-8.63202e-09	-7.19335e-10
11	-1.36158e-09	-1.3792e-09	-1.14557e-09	-3.57218e-09	-4.18488e-09	-2.8485e-09	-4.18472e-09	-3.15443e-09	-1.63921e-09	-1.65171e-08	-1.89961e-09	-2.46036e-09	-1.11142e-09	-1.40336e-09	-3.73831e-09	-2.46588e-09	-2.76106e-09	-4.10495e-10	-1.09465e-09	-9.85189e-09	-8.20991e-10
12	-1.54749e-09	-1.56671e-09	-1.19354e-09	-3.99041e-09	-4.8293e-09	-3.11272e-09	-4.67036e-09	-3.48929e-09	-1.83102e-09	-1.86098e-08	-2.21727e-09	-2.79273e-09	-1.2086e-09	-1.56655e-09	-4.05539e-09	-2.73681e-09	-3.41254e-09	-4.61989e-10	-1.23197e-09	-1.10877e-08	-9.23978e-10
13	-1.68543e-09	-1.70626e-09	-1.36162e-09	-4.30578e-09	-5.54119e-09	-3.40202e-09	-5.05787e-09	-3.80378e-09	-2.01789e-09	-2.0519e-08	-2.66771e-09	-3.1523e-09	-1.30574e-09	-1.73244e-09	-4.35502e-09	-3.011e-09	-4.22035e-09	-5.13569e-10	-1.36952e-09	-1.23257e-08	-1.02714e-09
14	-1.85972e-09	-1.88215e-09	-1.52803e-09	-4.74525e-09	-6.13304e-09	-3.71476e-09	-5.44599e-09	-4.13444e-09	-2.24219e-09	-2.2594e-08	-3.03373e-09	-3.47779e-09	-1.40631e-09	-1.9015e-09	-4.66691e-09	-3.29056e-09	-4.7448e-09	-5.64714e-10	-1.50591e-09	-1.35531e-08	-1.12943e-09
15	-2.07675e-09	-2.10078e-09	-1.64242e-09	-5.08535e-09	-6.78362e-09	-4.07937e-09	-5.78944e-09	-4.48317e-09	-2.43639e-09	-2.46849e-08	-3.51161e-09	-3.78925e-09	-1.50782e-09	-2.03091e-09	-4.99396e-09	-3.58623e-09	-5.48746e-09	-6.18158e-10	-1.64842e-09	-1.48358e-08	-1.23632e-09
16	-2.27271e-09	-2.29834e-09	-1.74324e-09	-5.48677e-09	-7.40822e-09	-4.42147e-09	-6.15927e-09	-4.82869e-09	-2.61686e-09	-2.6783e-08	-3.91977e-09	-4.14722e-09	-1.60396e-09	-2.18334e-09	-5.31174e-09	-3.93941e-09	-6.29496e-09	-6.72198e-10	-1.79253e-09	-1.61328e-08	-1.3444e-09
17	-2.48756e-09	-2.5148e-09	-1.89897e-09	-5.80036e-09	-8.01341e-09	-4.80732e-09	-6.53335e-09	-5.10915e-09	-2.82994e-09	-2.8859e-08	-4.36571e-09	-4.50652e-09	-1.69327e-09	-2.35269e-09	-5.63621e-09	-4.19385e-09	-7.1101e-09	-7.25825e-10	-1.93553e-09	-1.74198e-08	-1.45165e-09
18	-2.66524e-09	-2.69407e-09	-1.97865e-09	-6.1797e-09	-8.6445e-09	-5.11379e-09	-6.87206e-09	-5.39423e-09	-3.09574e-09	-3.08428e-08	-4.75068e-09	-4.84314e-09	-1.79612e-09	-2.57943e-09	-5.95165e-09	-4.53678e-09	-7.91094e-09	-7.78305e-10	-2.07548e-09	-1.86793e-08	-1.55661e-09
19	-2.8973e-09	-2.92773e-09	-2.11724e-09	-6.53583e-09	-9.2543e-09	-5.43619e-09	-7.22989e-09	-5.68674e-09	-3.30568e-09	-3.26495e-08	-5.13561e-09	-5.23466e-09	-1.89542e-09	-2.74683e-09	-6.27853e-09	-4.89758e-09	-8.68515e-09	-8.30251e-10	-2.214e-09	-1.9926e-08	-1.6605e-09
20	-3.12895e-09	-3.16098e-09	-2.24162e-09	-6.87356e-09	-9.94656e-09	-5.7984e-09	-7.54458e-09	-5.94428e-09	-3.48456e-09	-3.45072e-08	-5.60021e-09	-5.55508e-09	-1.98098e-09	-2.89194e-09	-6.63748e-09	-5.22451e-09	-9.49802e-09	-8.82492e-10	-2.35331e-09	-2.11798e-08	-1.76498e-09
21	-3.39227e-09	-3.42591e-09	-2.48059e-09	-7.17412e-09	-1.06844e-08	-6.13642e-09	-7.88741e-09	-6.25352e-09	-3.749e-09	-3.64558e-08	-6.02947e-09	-5.87536e-09	-2.06965e-09	-3.05147e-09	-6.99865e-09	-5.55296e-09	-1.03246e-08	-9.37806e-10	-2.50082e-09	-2.25073e-08	-1.87561e-09
22	-3.65091e-09	-3.68616e-09	-2.59243e-09	-7.4749e-09	-1.13613e-08	-6.54787e-09	-8.2073e-09	-6.57507e-09	-3.96789e-09	-3.83419e-08	-6.55307e-09	-6.18267e-09	-2.1602e-09	-3.21807e-09	-7.3408e-09	-5.80857e-09	-1.12113e-08	-9.91768e-10	-2.64471e-09	-2.38024e-08	-1.98354e-09
23	-3.94363e-09	-3.98047e-09	-2.77153e-09	-7.74269e-09	-1.20425e-08	-6.8837e-09	-8.53919e-09	-6.86199e-09	-4.25933e-09	-4.03381e-08	-7.06727e-09	-6.52048e-09	-2.24574e-09	-3.34331e-09	-7.68314e-09	-6.09796e-09	-1.22105e-08	-1.04803e-09	-2.79474e-09	-2.51526e-08	-2.09605e-09
24	-4.22104e-09	-4.25948e-09	-2.92013e-09	-8.02691e-09	-1.27587e-08	-7.17014e-09	-8.85263e-09	-7.15071e-09	-4.40953e-09	-4.21417e-08	-7.47112e-09	-6.87946e-09	-2.33159e-09	-3.50173e-09	-7.98013e-09	-6.35971e-09	-1.31298e-08	-1.09974e-09	-2.93264e-09	-2.63937e-08	-2.19948e-09
25	-4.40752e-09	-4.44757e-09	-3.02857e-09	-8.31225e-09	-1.3583e-08	-7.56314e-09	-9.17233e-09	-7.43374e-09	-4.58361e-09	-4.41892e-08	-7.90806e-09	-7.20792e-09	-2.41869e-09	-3.63691e-09	-8.26426e-09	-6.59566e-09	-1.38866e-08	-1.15176e-09	-3.07135e-09	-2.76422e-08	-2.30352e-09
26	-4.64761e-09	-4.68926e-09	-3.19503e-09	-8.59214e-09	-1.43141e-08	-7.86833e-09	-9.51908e-09	-7.70584e-09	-4.72823e-09	-4.61211e-08	-8.34748e-09	-7.59751e-09	-2.50454e-09	-3.75385e-09	-8.5425e-09	-6.85616e-09	-1.48071e-08	-1.20434e-09	-3.21157e-09	-2.89041e-08	-2.40867e-09
27	-4.82098e-09	-4.86423e-09	-3.36478e-09	-8.86035e-09	-1.49483e-08	-8.16882e-09	-9.88284e-09	-7.98373e-09	-4.89573e-09	-4.78381e-08	-8.7928e-09	-7.89381e-09	-2.58538e-09	-3.88755e-09	-8.9103e-09	-7.09646e-09	-1.57413e-08	-1.25394e-09	-3.34383e-09	-3.00945e-08	-2.50787e-09
28	-5.10467e-09	-5.14953e-09	-3.49695e-09	-9.16075e-09	-1.55193e-08	-8.57136e-09	-1.0149e-08	-8.27687e-09	-5.0901e-09	-4.97916e-08	-9.27058e-09	-8.22977e-09	-2.66499e-09	-4.01957e-09	-9.21484e-09	-7.38257e-09	-1.65912e-08	-1.3065e-09	-3.48399e-09	-3.13559e-08	-2.61299e-09
29	-5.32087e-09	-5.36733e-09	-3.75466e-09	-9.49806e-09	-1.62434e-08	-8.89747e-09	-1.04718e-08	-8.5843e-09	-5.27116e-09	-5.17752e-08	-9.65085e-09	-8.56234e-09	-2.74802e-09	-4.15368e-09	-9.49443e-09	-7.68553e-09	-1.75302e-08	-1.36036e-09	-3.62763e-09	-3.26487e-08	-2.72073e-09
30	-5.56427e-09	-5.61232e-09	-3.86073e-09	-9.74647e-09	-1.70547e-08	-9.1617e-09	-1.07606e-08	-8.84355e-09	-5.44609e-09	-5.36409e-08	-1.01145e-08	-8.8693e-09	-2.83041e-09	-4.25447e-09	-9.77906e-09	-7.96535e-09	-1.83478e-08	-1.41068e-09	-3.76181e-09	-3.38563e-08	-2.82136e-09
31	-5.76142e-09	-5.81108e-09	-3.99342e-09	-9.9707e-09	-1.77294e-08	-9.49499e-09	-1.10293e-08	-9.13741e-09	-5.62104e-09	-5.54708e-08	-1.05566e-08	-9.1569e-09	-2.90968e-09	-4.36007e-09	-1.00648e-08	-8.24618e-09	-1.93205e-08	-1.46055e-09	-3.89479e-09	-3.50531e-08	-2.92109e-09
32	-5.97889e-09	-6.03016e-09	-4.20037e-09	-1.01803e-08	-1.85586e-08	-9.80702e-09	-1.12756e-08	-9.36671e-09	-5.75032e-09	-5.72332e-08	-1.1009e-08	-9.44327e-09	-3.00081e-09	-4.48774e-09	-1.03599e-08	-8.52824e-09	-2.01665e-08	-1.51012e-09	-4.02699e-09	-3.62429e-08	-3.02024e-09
33	-6.29044e-09	-6.3433e-09	-4.37289e-09	-1.04564e-08	-1.91941e-08	-1.00975e-08	-1.15709e-08	-9.62794e-09	-5.91478e-09	-5.89994e-08	-1.14026e-08	-9.77526e-09	-3.08663e-09	-4.63968e-09	-1.06306e-08	-8.796e-09	-2.08711e-08	-1.55933e-09	-4.15823e-09	-3.7424e-08	-3.11867e-09
34	-6.46893e-09	-6.52339e-09	-4.55584e-09	-1.07382e-08	-1.98915e-08	-1.04114e-08	-1.18776e-08	-9.87159e-09	-6.05504e-09	-6.07885e-08	-1.18958e-08	-1.00816e-08	-3.16589e-09	-4.73777e-09	-1.08662e-08	-9.12546e-09	-2.19121e-08	-1.61005e-09	-4.29347e-09	-3.86412e-08	-3.2201e-09
35	-6.74143e-09	-6.79749e-09	-4.81022e-09	-1.09563e-08	-2.05601e-08	-1.0789e-08	-1.21226e-08	-1.01133e-08	-6.17479e-09	-6.27766e-08	-1.2344e-08	-1.03674e-08	-3.24483e-09	-4.88589e-09	-1.1124e-08	-9.39254e-09	-2.27619e-08	-1.66149e-09	-4.43064e-09	-3.98757e-08	-3.32298e-09
36	-6.98393e-09	-7.0416e-09	-4.92705e-09	-1.12142e-08	-2.12633e-08	-1.10617e-08	-1.2421e-08	-1.0444e-08	-6.35559e-09	-6.45541e-08	-1.28057e-08	-1.06608e-08	-3.32565e-09	-5.01375e-09	-1.13877e-08	-9.78893e-09	-2.36663e-08	-1.71261e-09	-4.56697e-09	-4.11027e-08	-3.42522e-09
37	-7.25801e-09	-7.31728e-09	-5.104e-09	-1.1502e-08	-2.19743e-08	-1.14052e-08	-1.26573e-08	-1.07256e-08	-6.50813e-09	-6.63832e-08	-1.31938e-08	-1.09497e-08	-3.40677e-09	-5.17821e-09	-1.16923e-08	-1.00529e-08	-2.44544e-08	-1.76296e-09	-4.70124e-09	-4.23111e-08	-3.52593e-09
38	-7.50522e-09	-7.56609e-09	-5.21583e-09	-1.1726e-08	-2.2756e-08	-1.17336e-08	-1.29345e-08	-1.09793e-08	-6.70207e-09	-6.82627e-08	-1.35957e-08	-1.1208e-08	-3.47741e-09	-5.28146e-09	-1.19957e-08	-1.03552e-08	-2.53383e-08	-1.81348e-09	-4.83594e-09	-4.35235e-08	-3.62696e-09
39	-7.62806e-09	-7.69054e-09	-5.37629e-09	-1.20067e-08	-2.34819e-08	-1.20966e-08	-1.31461e-08	-1.12263e-08	-6.8463e-09	-7.01863e-08	-1.3965e-08	-1.1497e-08	-3.55634e-09	-5.4257e-09	-1.22718e-08	-1.05864e-08	-2.60787e-08	-1.86078e-09	-4.96208e-09	-4.46587e-08	-3.72156e-09
40	-7.88216e-09	-7.94624e-09	-5.50382e-09	-1.22246e-08	-2.41772e-08	-1.25401e-08	-1.3375e-08	-1.14661e-08	-6.96546e-09	-7.19584e-08	-1.43737e-08	-1.17733e-08	-3.62777e-09	-5.55467e-09	-1.25562e-08	-1.08701e-08	-2.68875e-08	-1.90943e-09	-5.09181e-09	-4.58263e-08	-3.81886e-09
41	-8.04502e-09	-8.1107e-09	-5.57276e-09	-1.24218e-08	-2.48578e-08	-1.28734e-08	-1.36075e-08	-1.16965e-08	-7.05202e-09	-7.35914e-08	-1.46986e-08	-1.20267e-08	-3.71138e-09	-5.66603e-09	-1.27988e-08	-1.1202e-08	-2.78643e-08	-1.95439e-09	-5.2117e-09	-4.69053e-08	-3.90878e-09
42	-8.21726e-09	-8.28454e-09	-5.85221e-09	-1.26861e-08	-2.56636e-08	-1.32101e-08	-1.38202e-08	-1.19246e-08	-7.21714e-09	-7.53429e-08	-1.50644e-08	-1.23206e-08	-3.79717e-09	-5.79133e-09	-1.30304e-08	-1.14587e-08	-2.87408e-08	-2.0031e-09	-5.34161e-09	-4.80745e-08	-4.00621e-09
43	-8.39107e-09	-8.45996e-09	-5.96718e-09	-1.29534e-08	-2.64247e-08	-1.35705e-08	-1.40621e-08	-1.22123e-08	-7.3582e-09	-7.70369e-08	-1.5518e-08	-1.26202e-08	-3.87516e-09	-5.89044e-09	-1.32647e-08	-1.17331e-08	-2.9649e-08	-2.05137e-09	-5.47033e-09	-4.9233e-08	-4.10275e-09
44	-8.51879e-09	-8.58928e-09	-6.10332e-09	-1.32576e-08	-2.71889e-08	-1.38412e-08	-1.42876e-08	-1.2524e-08	-7.56449e-09	-7.87594e-08	-1.58718e-08	-1.29261e-08	-3.95157e-09	-6.01427e-09	-1.35769e-08	-1.20124e-08	-3.04258e-08	-2.09863e-09	-5.59634e-09	-5.03671e-08	-4.19726e-09
45	-8.76262e-09	-8.83471e-09	-6.31176e-09	-1.34744e-08	-2.79177e-08	-1.41426e-08	-1.45264e-08	-1.27516e-08	-7.74646e-09	-8.05663e-08	-1.62769e-08	-1.32201e-08	-4.02767e-09	-6.12331e-09	-1.37839e-08	-1.23221e-08	-3.11637e-08	-2.14671e-09	-5.72455e-09	-5.1521e-08	-4.29342e-09
46	-8.90363e-09	-8.97732e-09	-6.44883e-09	-1.37168e-08	-2.85894e-08	-1.44072e-08	-1.47426e-08	-1.3008e-08	-7.88805e-09	-8.23901e-08	-1.66292e-08	-1.34969e-08	-4.09658e-09	-6.23489e-09	-1.40297e-08	-1.26219e-08	-3.1933e-08	-2.19202e-09	-5.84537e-09	-5.26084e-08	-4.38403e-09
47	-9.04747e-09	-9.12276e-09	-6.64827e-09	-1.39707e-08	-2.93572e-08	-1.46667e-08	-1.49924e-08	-1.32508e-08	-8.02329e-09	-8.42387e-08	-1.70223e-08	-1.37813e-08	-4.16799e-09	-6.32699e-09	-1.42373e-08	-1.28666e-08	-3.26629e-08	-2.23812e-09	-5.96831e-09	-5.37148e-08	-4.47623e-09
48	-9.20038e-09	-9.27728e-09	-6.82136e-09	-1.42032e-08	-3.00703e-08	-1.49475e-08	-1.52259e-08	-1.34619e-08	-8.16183e-09	-8.59657e-08	-1.73807e-08	-1.40553e-08	-4.2363e-09	-6.40959e-09	-1.44422e-08	-1.31964e-08	-3.36242e-08	-2.28441e-09	-6.09177e-09	-5.48259e-08	-4.56882e-09
49	-9.31737e-09	-9.39587e-09	-7.02775e-09	-1.44647e-08	-3.08825e-08	-1.52104e-08	-1.545e-08	-1.3692e-08	-8.33502e-09	-8.79968e-08	-1.77544e-08	-1.43516e-08	-4.30613e-09	-6.53334e-09	-1.46891e-08	-1.35148e-08	-3.44091e-08	-2.33332e-09	-6.22217e-09	-5.59996e-08	-4.66663e-09
50	-9.42654e-09	-9.50664e-09	-7.16529e-09	-1.46555e-08	-3.15736e-08	-1.55017e-08	-1.56396e-08	-1.39079e-08	-8.50154e-09	-8.95917e-08	-1.81446e-08	-1.46494e-08	-4.37855e-09	-6.64524e-09	-1.493e-08	-1.37886e-08	-3.513e-08	-2.376e-09	-6.33601e-09	-5.70241e-08	-4.75201e-09
51	-9.52636e-09	-9.60806e-09	-7.28461e-09	-1.48573e-08	-3.22779e-08	-1.57993e-08	-1.5869e-08	-1.41391e-08	-8.67877e-09	-9.13169e-08	-1.85945e-08	-1.49738e-08	-4.44931e-09	-6.74563e-09	-1.51559e-08	-1.40979e-08	-3.58971e-08	-2.42111e-09	-6.4563e-09	-5.81067e-08	-4.84223e-09
52	-9.65024e-09	-9.73355e-09	-7.41693e-09	-1.50596e-08	-3.29555e-08	-1.60878e-08	-1.60908e-08	-1.43837e-08	-8.86606e-09	-9.29679e-08	-1.89592e-08	-1.52375e-08	-4.52445e-09	-6.8832e-09	-1.53663e-08	-1.43737e-08	-3.65985e-08	-2.46437e-09	-6.57167e-09	-5.9145e-08	-4.92875e-09
53	-9.75195e-09	-9.83685e-09	-7.59347e-09	-1.53512e-08	-3.36613e-08	-1.63538e-08	-1.62949e-08	-1.46357e-08	-8.99654e-09	-9.4746e-08	-1.93628e-08	-1.55488e-08	-4.58865e-09	-7.01368e-09	-1.56024e-08	-1.46113e-08	-3.73848e-08	-2.50981e-09	-6.69283e-09	-6.02354e-08	-5.01962e-09
54	-9.88928e-09	-9.97579e-09	-7.74235e-09	-1.55622e-08	-3.44964e-08	-1.6617e-08	-1.65071e-08	-1.49068e-08	-9.12042e-09	-9.64173e-08	-1.97476e-08	-1.58714e-08	-4.65566e-09	-7.09546e-09	-1.58568e-08	-1.49172e-08	-3.81462e-08	-2.55533e-09	-6.81421e-09	-6.13279e-08	-5.11066e-09
55	-1.00113e-08	-1.00994e-08	-7.90738e-09	-1.57651e-08	-3.51305e-08	-1.68758e-08	-1.67549e-08	-1.51271e-08	-9.22324e-09	-9.79629e-08	-2.01202e-08	-1.61383e-08	-4.72736e-09	-7.20385e-09	-1.60728e-08	-1.52452e-08	-3.88065e-08	-2.59685e-09	-6.92494e-09	-6.23244e-08	-5.1937e-09
56	-1.0113e-08	-1.02028e-08	-8.00728e-09	-1.60505e-08	-3.58452e-08	-1.71408e-08	-1.69447e-08	-1.53846e-08	-9.32427e-09	-9.96024e-08	-2.05115e-08	-1.64492e-08	-4.79352e-09	-7.28843e-09	-1.62968e-08	-1.54424e-08	-3.95085e-08	-2.63901e-09	-7.03737e-09	-6.33363e-08	-5.27803e-09
57	-1.02145e-08	-1.03058e-08	-8.17611e-09	-1.61953e-08	-3.65464e-08	-1.74306e-08	-1.71432e-08	-1.56085e-08	-9.41081e-09	-1.01414e-07	-2.08913e-08	-1.66946e-08	-4.85959e-09	-7.40644e-09	-1.65021e-08	-1.57131e-08	-4.02612e-08	-2.68216e-09	-7.15242e-09	-6.43718e-08	-5.36432e-09
58	-1.03087e-08	-1.04016e-08	-8.31422e-09	-1.6368e-08	-3.73604e-08	-1.77434e-08	-1.73402e-08	-1.58203e-08	-9.51292e-09	-1.03098e-07	-2.12588e-08	-1.6986e-08	-4.922e-09	-7.51453e-09	-1.66959e-08	-1.59906e-08	-4.1106e-08	-2.72604e-09	-7.26944e-09	-6.5425e-08	-5.45208e-09
59	-1.04017e-08	-1.04962e-08	-8.35769e-09	-1.6547e-08	-3.80203e-08	-1.79603e-08	-1.75412e-08	-1.60259e-08	-9.63849e-09	-1.04795e-07	-2.16353e-08	-1.72426e-08	-4.99055e-09	-7.61466e-09	-1.69333e-08	-1.62918e-08	-4.18965e-08	-2.76756e-09	-7.38017e-09	-6.64215e-08	-5.53512e-09
60	-1.05088e-08	-1.06049e-08	-8.46648e-09	-1.67846e-08	-3.86467e-08	-1.81858e-08	-1.77039e-08	-1.62496e-08	-9.77165e-09	-1.0634e-07	-2.19943e-08	-1.74953e-08	-5.05973e-09	-7.71203e-09	-1.70989e-08	-1.65465e-08	-4.26244e-08	-2.80731e-09	-7.48615e-09	-6.73753e-08	-5.61461e-09
61	-1.06059e-08	-1.07036e-08	-8.57229e-09	-1.69852e-08	-3.9394e-08	-1.8458e-08	-1.79077e-08	-1.65208e-08	-9.91737e-09	-1.0792e-07	-2.23877e-08	-1.77798e-08	-5.14109e-09	-7.80568e-09	-1.72619e-08	-1.69365e-08	-4.33432e-08	-2.8503e-09	-7.6008e-09	-6.84072e-08	-5.7006e-09
62	-1.0688e-08	-1.07873e-08	-8.64863e-09	-1.71562e-08	-4.01276e-08	-1.86896e-08	-1.8097e-08	-1.67006e-08	-1.00231e-08	-1.09523e-07	-2.27457e-08	-1.80346e-08	-5.21464e-09	-7.89439e-09	-1.7442e-08	-1.726e-08	-4.41856e-08	-2.89131e-09	-7.71016e-09	-6.93914e-08	-5.78262e-09
63	-1.07794e-08	-1.08804e-08	-8.72082e-09	-1.73443e-08	-4.08626e-08	-1.90009e-08	-1.83273e-08	-1.69376e-08	-1.01829e-08	-1.11209e-07	-2.31477e-08	-1.83023e-08	-5.28068e-09	-7.9997e-09	-1.7614e-08	-1.7502e-08	-4.4986e-08	-2.93439e-09	-7.82505e-09	-7.04255e-08	-5.86879e-09
64	-1.08667e-08	-1.09693e-08	-8.77695e-09	-1.75608e-08	-4.15694e-08	-1.92771e-08	-1.8529e-08	-1.71426e-08	-1.02847e-08	-1.12811e-07	-2.35097e-08	-1.86252e-08	-5.3436e-09	-8.09724e-09	-1.77926e-08	-1.77249e-08	-4.56901e-08	-2.97479e-09	-7.93276e-09	-7.13949e-08	-5.94957e-09
65	-1.09645e-08	-1.10686e-08	-8.84545e-09	-1.77414e-08	-4.2361e-08	-1.95347e-08	-1.87356e-08	-1.73344e-08	-1.03954e-08	-1.14437e-07	-2.38914e-08	-1.88804e-08	-5.40745e-09	-8.18654e-09	-1.79607e-08	-1.80065e-08	-4.64509e-08	-3.01619e-09	-8.04318e-09	-7.23886e-08	-6.03238e-09
66	-1.10263e-08	-1.1132e-08	-8.89907e-09	-1.7937e-08	-4.30731e-08	-1.98305e-08	-1.8911e-08	-1.75286e-08	-1.05262e-08	-1.1598e-07	-2.42909e-08	-1.92153e-08	-5.47442e-09	-8.27589e-09	-1.8139e-08	-1.82956e-08	-4.71879e-08	-3.05679e-09	-8.15143e-09	-7.33628e-08	-6.11357e-09
67	-1.11156e-08	-1.12229e-08	-8.94827e-09	-1.81386e-08	-4.37056e-08	-2.01271e-08	-1.91045e-08	-1.77022e-08	-1.06701e-08	-1.17559e-07	-2.46709e-08	-1.95061e-08	-5.53764e-09	-8.37123e-09	-1.82789e-08	-1.85834e-08	-4.80876e-08	-3.09801e-09	-8.26137e-09	-7.43523e-08	-6.19602e-09
68	-1.12171e-08	-1.1326e-08	-9.00633e-09	-1.83449e-08	-4.44451e-08	-2.03837e-08	-1.93228e-08	-1.79094e-08	-1.07735e-08	-1.1919e-07	-2.50225e-08	-1.97229e-08	-5.60058e-09	-8.49084e-09	-1.84487e-08	-1.88963e-08	-4.87877e-08	-3.13888e-09	-8.37036e-09	-7.53332e-08	-6.27777e-09
69	-1.12974e-08	-1.14079e-08	-9.04429e-09	-1.8494e-08	-4.52012e-08	-2.06127e-08	-1.95416e-08	-1.81119e-08	-1.08788e-08	-1.2065e-07	-2.54556e-08	-1.9966e-08	-5.66411e-09	-8.60564e-09	-1.8605e-08	-1.91357e-08	-4.93785e-08	-3.17684e-09	-8.47158e-09	-7.62442e-08	-6.35368e-09
70	-1.13559e-08	-1.1468e-08	-9.19116e-09	-1.86666e-08	-4.58942e-08	-2.08752e-08	-1.97549e-08	-1.83271e-08	-1.10296e-08	-1.22134e-07	-2.57706e-08	-2.02253e-08	-5.7228e-09	-8.69392e-09	-1.87944e-08	-1.93908e-08	-5.01352e-08	-3.21639e-09	-8.57705e-09	-7.71935e-08	-6.43279e-09
71	-1.14443e-08	-1.1558e-08	-9.25916e-09	-1.88949e-08	-4.6548e-08	-2.10908e-08	-1.99343e-08	-1.85031e-08	-1.11424e-08	-1.23735e-07	-2.6117e-08	-2.0553e-08	-5.78382e-09	-8.80302e-09	-1.89391e-08	-1.96626e-08	-5.0933e-08	-3.25663e-09	-8.68434e-09	-7.81591e-08	-6.51326e-09
72	-1.15041e-08	-1.16195e-08	-9.36805e-09	-1.9077e-08	-4.71927e-08	-2.13439e-08	-2.00822e-08	-1.87007e-08	-1.12568e-08	-1.25371e-07	-2.65321e-08	-2.08224e-08	-5.85046e-09	-8.89638e-09	-1.91699e-08	-1.99495e-08	-5.15826e-08	-3.29647e-09	-8.79057e-09	-7.91152e-08	-6.59293e-09
73	-1.15894e-08	-1.17064e-08	-9.52051e-09	-1.92621e-08	-4.7849e-08	-2.15924e-08	-2.02185e-08	-1.8937e-08	-1.13673e-08	-1.27011e-07	-2.69226e-08	-2.10633e-08	-5.91335e-09	-9.04573e-09	-1.93277e-08	-2.0197e-08	-5.22993e-08	-3.33693e-09	-8.89848e-09	-8.00863e-08	-6.67386e-09
74	-1.16762e-08	-1.17947e-08	-9.74126e-09	-1.94439e-08	-4.85662e-08	-2.18536e-08	-2.03772e-08	-1.91389e-08	-1.14452e-08	-1.28593e-07	-2.72577e-08	-2.13289e-08	-5.96717e-09	-9.14575e-09	-1.94954e-08	-2.04209e-08	-5.30272e-08	-3.37701e-09	-9.00536e-09	-8.10482e-08	-6.75402e-09
75	-1.17681e-08	-1.18882e-08	-9.91476e-09	-1.9646e-08	-4.93249e-08	-2.20829e-08	-2.05532e-08	-1.93028e-08	-1.15263e-08	-1.30085e-07	-2.76485e-08	-2.16311e-08	-6.02943e-09	-9.23362e-09	-1.96624e-08	-2.06742e-08	-5.3685e-08	-3.41659e-09	-9.11091e-09	-8.19982e-08	-6.83318e-09
76	-1.18362e-08	-1.1958e-08	-9.99024e-09	-1.98771e-08	-4.99663e-08	-2.23551e-08	-2.07173e-08	-1.9517e-08	-1.15765e-08	-1.3154e-07	-2.80092e-08	-2.18607e-08	-6.08887e-09	-9.32916e-09	-1.98391e-08	-2.09295e-08	-5.42545e-08	-3.45327e-09	-9.20872e-09	-8.28785e-08	-6.90654e-09
77	-1.19097e-08	-1.2033e-08	-1.00209e-08	-2.00661e-08	-5.06174e-08	-2.26235e-08	-2.08961e-08	-1.97145e-08	-1.1665e-08	-1.33086e-07	-2.83527e-08	-2.2107e-08	-6.14581e-09	-9.43713e-09	-1.99774e-08	-2.11869e-08	-5.4837e-08	-3.49027e-09	-9.30738e-09	-8.37664e-08	-6.98053e-09
78	-1.19819e-08	-1.21068e-08	-1.01049e-08	-2.02402e-08	-5.12463e-08	-2.28801e-08	-2.111e-08	-1.98857e-08	-1.17485e-08	-1.34636e-07	-2.87171e-08	-2.23504e-08	-6.19337e-09	-9.54577e-09	-2.01199e-08	-2.14268e-08	-5.56553e-08	-3.52904e-09	-9.41077e-09	-8.46969e-08	-7.05807e-09
79	-1.20597e-08	-1.21863e-08	-1.02923e-08	-2.04399e-08	-5.18633e-08	-2.31066e-08	-2.12657e-08	-2.00274e-08	-1.1826e-08	-1.36149e-07	-2.9038e-08	-2.25573e-08	-6.2503e-09	-9.6207e-09	-2.02521e-08	-2.16921e-08	-5.63742e-08	-3.56618e-09	-9.50982e-09	-8.55884e-08	-7.13237e-09
80	-1.21246e-08	-1.22527e-08	-1.03791e-08	-2.0744e-08	-5.25259e-08	-2.33012e-08	-2.14149e-08	-2.0186e-08	-1.19392e-08	-1.37574e-07	-2.93945e-08	-2.28055e-08	-6.30394e-09	-9.70364e-09	-2.04135e-08	-2.19248e-08	-5.70194e-08	-3.60299e-09	-9.60798e-09	-8.64718e-08	-7.20598e-09
81	-1.21984e-08	-1.23281e-08	-1.04315e-08	-2.09506e-08	-5.30884e-08	-2.35305e-08	-2.15628e-08	-2.03486e-08	-1.20653e-08	-1.39052e-07	-2.98197e-08	-2.30543e-08	-6.35431e-09	-9.79022e-09	-2.05534e-08	-2.2138e-08	-5.77228e-08	-3.63962e-09	-9.70567e-09	-8.7351e-08	-7.27925e-09
82	-1.22794e-08	-1.24107e-08	-1.05148e-08	-2.10875e-08	-5.37666e-08	-2.3786e-08	-2.17145e-08	-2.05161e-08	-1.21699e-08	-1.40459e-07	-3.01637e-08	-2.32953e-08	-6.40278e-09	-9.86232e-09	-2.06764e-08	-2.24033e-08	-5.84181e-08	-3.67593e-09	-9.80248e-09	-8.82223e-08	-7.35186e-09
83	-1.23404e-08	-1.24733e-08	-1.05675e-08	-2.13136e-08	-5.45003e-08	-2.39432e-08	-2.18879e-08	-2.07144e-08	-1.2234e-08	-1.42043e-07	-3.04864e-08	-2.35526e-08	-6.45908e-09	-9.95618e-09	-2.07985e-08	-2.26708e-08	-5.90657e-08	-3.71329e-09	-9.9021e-09	-8.91189e-08	-7.42657e-09
84	-1.23985e-08	-1.2533e-08	-1.07974e-08	-2.14972e-08	-5.51446e-08	-2.42453e-08	-2.2059e-08	-2.08668e-08	-1.23265e-08	-1.43888e-07	-3.08715e-08	-2.38093e-08	-6.51725e-09	-1.0051e-08	-2.09348e-08	-2.28796e-08	-5.97681e-08	-3.75432e-09	-1.00115e-08	-9.01037e-08	-7.50864e-09
85	-1.24814e-08	-1.26175e-08	-1.09002e-08	-2.16339e-08	-5.57995e-08	-2.44815e-08	-2.2229e-08	-2.10335e-08	-1.24137e-08	-1.45482e-07	-3.12166e-08	-2.40672e-08	-6.5726e-09	-1.01645e-08	-2.10571e-08	-2.31338e-08	-6.04086e-08	-3.79186e-09	-1.01116e-08	-9.10046e-08	-7.58371e-09
86	-1.25615e-08	-1.26992e-08	-1.09801e-08	-2.17916e-08	-5.64397e-08	-2.47148e-08	-2.24113e-08	-2.1134e-08	-1.25135e-08	-1.47023e-07	-3.15692e-08	-2.43207e-08	-6.62732e-09	-1.02733e-08	-2.11925e-08	-2.33874e-08	-6.12398e-08	-3.82999e-09	-1.02133e-08	-9.19198e-08	-7.65998e-09
87	-1.26788e-08	-1.28181e-08	-1.10802e-08	-2.19777e-08	-5.70423e-08	-2.49266e-08	-2.25579e-08	-2.12852e-08	-1.2635e-08	-1.48362e-07	-3.19831e-08	-2.45918e-08	-6.68141e-09	-1.03577e-08	-2.13218e-08	-2.36425e-08	-6.19427e-08	-3.8668e-09	-1.03115e-08	-9.28032e-08	-7.7336e-09
88	-1.27535e-08	-1.28945e-08	-1.1203e-08	-2.21304e-08	-5.78308e-08	-2.51246e-08	-2.27232e-08	-2.14376e-08	-1.27362e-08	-1.4985e-07	-3.23456e-08	-2.48025e-08	-6.73676e-09	-1.04278e-08	-2.14613e-08	-2.38851e-08	-6.27728e-08	-3.90526e-09	-1.0414e-08	-9.37263e-08	-7.81052e-09
89	-1.28171e-08	-1.29597e-08	-1.12931e-08	-2.23354e-08	-5.84942e-08	-2.5317e-08	-2.28751e-08	-2.1584e-08	-1.28475e-08	-1.51328e-07	-3.26753e-08	-2.50323e-08	-6.79303e-09	-1.05126e-08	-2.1595e-08	-2.41792e-08	-6.34859e-08	-3.94209e-09	-1.05122e-08	-9.46102e-08	-7.88418e-09
90	-1.29075e-08	-1.30517e-08	-1.13097e-08	-2.24747e-08	-5.90443e-08	-2.55381e-08	-2.30308e-08	-2.17409e-08	-1.29872e-08	-1.52935e-07	-3.30165e-08	-2.52743e-08	-6.85227e-09	-1.05858e-08	-2.17142e-08	-2.44867e-08	-6.41362e-08	-3.97857e-09	-1.06095e-08	-9.54857e-08	-7.95715e-09
91	-1.29767e-08	-1.31225e-08	-1.15218e-08	-2.26219e-08	-5.97296e-08	-2.57937e-08	-2.32343e-08	-2.18931e-08	-1.30877e-08	-1.54403e-07	-3.34202e-08	-2.55045e-08	-6.90635e-09	-1.06824e-08	-2.18368e-08	-2.47601e-08	-6.49104e-08	-4.01768e-09	-1.07138e-08	-9.64244e-08	-8.03537e-09
92	-1.30331e-08	-1.31805e-08	-1.16047e-08	-2.2765e-08	-6.03998e-08	-2.60379e-08	-2.33865e-08	-2.20118e-08	-1.31877e-08	-1.55795e-07	-3.37673e-08	-2.57599e-08	-6.96525e-09	-1.07945e-08	-2.19633e-08	-2.49829e-08	-6.56162e-08	-4.05332e-09	-1.08089e-08	-9.72797e-08	-8.10664e-09
93	-1.31095e-08	-1.32585e-08	-1.16758e-08	-2.29319e-08	-6.09613e-08	-2.62391e-08	-2.355e-08	-2.21985e-08	-1.32959e-08	-1.57257e-07	-3.40535e-08	-2.60254e-08	-7.01745e-09	-1.08838e-08	-2.20684e-08	-2.51773e-08	-6.62639e-08	-4.08799e-09	-1.09013e-08	-9.81119e-08	-8.17599e-09
94	-1.32003e-08	-1.33509e-08	-1.17366e-08	-2.31044e-08	-6.16199e-08	-2.64368e-08	-2.3737e-08	-2.23493e-08	-1.34088e-08	-1.58672e-07	-3.43677e-08	-2.63091e-08	-7.07746e-09	-1.09588e-08	-2.21684e-08	-2.5371e-08	-6.69589e-08	-4.12373e-09	-1.09966e-08	-9.89695e-08	-8.24746e-09
95	-1.32742e-08	-1.34264e-08	-1.18376e-08	-2.33751e-08	-6.22788e-08	-2.66679e-08	-2.38573e-08	-2.24512e-08	-1.35496e-08	-1.60042e-07	-3.47347e-08	-2.65968e-08	-7.13153e-09	-1.10456e-08	-2.22965e-08	-2.5625e-08	-6.75922e-08	-4.16016e-09	-1.10938e-08	-9.9844e-08	-8.32033e-09
96	-1.33446e-08	-1.34984e-08	-1.19469e-08	-2.35084e-08	-6.29992e-08	-2.68969e-08	-2.40068e-08	-2.26068e-08	-1.36414e-08	-1.61509e-07	-3.51011e-08	-2.68574e-08	-7.18458e-09	-1.11208e-08	-2.2515e-08	-2.58233e-08	-6.84174e-08	-4.19837e-09	-1.11956e-08	-1.00761e-07	-8.39673e-09
97	-1.34154e-08	-1.35708e-08	-1.19691e-08	-2.36816e-08	-6.36502e-08	-2.70889e-08	-2.41281e-08	-2.27395e-08	-1.37546e-08	-1.62818e-07	-3.53818e-08	-2.70986e-08	-7.23489e-09	-1.12192e-08	-2.26474e-08	-2.6033e-08	-6.90647e-08	-4.23159e-09	-1.12842e-08	-1.01558e-07	-8.46317e-09
98	-1.34709e-08	-1.36279e-08	-1.20456e-08	-2.38852e-08	-6.4248e-08	-2.7381e-08	-2.42847e-08	-2.28706e-08	-1.38606e-08	-1.64214e-07	-3.57943e-08	-2.73513e-08	-7.28958e-09	-1.13026e-08	-2.27696e-08	-2.62636e-08	-6.97168e-08	-4.26747e-09	-1.13799e-08	-1.02419e-07	-8.53495e-09
99	-1.35364e-08	-1.3695e-08	-1.21039e-08	-2.40522e-08	-6.49808e-08	-2.76018e-08	-2.4421e-08	-2.3045e-08	-1.40245e-08	-1.65675e-07	-3.61362e-08	-2.76191e-08	-7.34113e-09	-1.13685e-08	-2.29238e-08	-2.65545e-08	-7.05951e-08	-4.30643e-09	-1.14838e-08	-1.03354e-07	-8.61285e-09
100	-1.36119e-08	-1.37721e-08	-1.21674e-08	-2.42193e-08	-6.56336e-08	-2.78009e-08	-2.45661e-08	-2.32291e-08	-1.41365e-08	-1.67163e-07	-3.64721e-08	-2.78387e-08	-7.4022e-09	-1.14373e-08	-2.30367e-08	-2.68749e-08	-7.13111e-08	-4.34318e-09	-1.15818e-08	-1.04236e-07	-8.68637e-09
Snap23 - Syt7 -- trains
1	-1.11809e-10	-1.311e-10	-5.09261e-11	-6.27809e-11	-5.26232e-12	-1.73316e-10	-2.6801e-10	-3.04242e-11	-9.79849e-11	-5.42928e-11	-5.09261e-11	-3.42686e-10	-2.52099e-10	-2.77987e-10	7.79087e-12	-6.15983e-11	-1.45277e-10	-8.26287e-11	-1.19424e-10	-1.08446e-10	-4.62669e-10	-1.15312e-10	-9.99458e-11	-2.2625e-10	-1.85683e-10	-2.78053e-10	-1.26875e-11	-1.19076e-10	-5.10233e-11
2	-2.39541e-10	-1.69736e-10	-1.10393e-10	-1.2752e-10	-3.55389e-11	-3.39553e-10	-4.79783e-10	-1.03029e-10	-2.35276e-10	-1.41379e-10	-1.10393e-10	-6.89871e-10	-5.48451e-10	-5.29282e-10	-7.28287e-12	-1.2463e-10	-3.01581e-10	-2.19805e-10	-2.9852e-10	-2.26792e-10	-8.41909e-10	-2.71568e-10	-2.32757e-10	-4.425e-10	-3.85499e-10	-5.55778e-10	-3.2e-11	-2.39749e-10	-1.26344e-10
3	-3.59445e-10	-3.3091e-10	-1.71243e-10	-1.82631e-10	-5.22604e-11	-5.09776e-10	-6.58896e-10	-1.80625e-10	-4.46322e-10	-3.53134e-10	-1.71243e-10	-1.07643e-09	-8.11052e-10	-8.46984e-10	-3.09542e-11	-2.05775e-10	-4.55755e-10	-3.75241e-10	-4.70738e-10	-3.75231e-10	-1.42852e-09	-4.92519e-10	-3.5415e-10	-7.11359e-10	-5.8382e-10	-8.37862e-10	-5.95625e-11	-4.07825e-10	-1.96025e-10
4	-4.7375e-10	-4.17132e-10	-2.42368e-10	-2.41015e-10	-8.80171e-11	-6.84219e-10	-8.2554e-10	-3.51334e-10	-5.88547e-10	-6.24244e-10	-2.42368e-10	-1.48135e-09	-1.19379e-09	-1.24897e-09	-6.24448e-11	-2.99698e-10	-6.28913e-10	-5.93054e-10	-7.1289e-10	-6.09151e-10	-2.21525e-09	-7.36211e-10	-5.54206e-10	-1.01464e-09	-7.56159e-10	-1.13712e-09	-8.95544e-11	-5.26455e-10	-2.75493e-10
5	-5.97375e-10	-4.85253e-10	-3.08768e-10	-3.34392e-10	-1.18128e-10	-8.57754e-10	-1.13938e-09	-6.75003e-10	-9.3578e-10	-1.17939e-09	-3.08768e-10	-2.02928e-09	-1.77177e-09	-1.69341e-09	-1.03766e-10	-4.02251e-10	-8.02283e-10	-7.88479e-10	-1.12897e-09	-8.77448e-10	-2.92832e-09	-9.69521e-10	-8.22212e-10	-1.34151e-09	-9.61269e-10	-1.43636e-09	-1.26867e-10	-6.59422e-10	-3.65832e-10
6	-7.30514e-10	-5.85916e-10	-3.84974e-10	-3.90106e-10	-1.48709e-10	-1.03523e-09	-1.34095e-09	-9.85227e-10	-1.43767e-09	-2.00172e-09	-3.84974e-10	-2.54783e-09	-2.36731e-09	-2.54884e-09	-1.53745e-10	-4.9405e-10	-1.01413e-09	-1.09567e-09	-1.67864e-09	-1.2584e-09	-3.5765e-09	-1.27276e-09	-1.17499e-09	-1.74396e-09	-1.17708e-09	-1.78683e-09	-1.68429e-10	-8.12909e-10	-4.54478e-10
7	-8.49422e-10	-6.75673e-10	-4.74735e-10	-4.64405e-10	-2.62522e-10	-1.21099e-09	-1.59412e-09	-1.36372e-09	-2.09128e-09	-2.94402e-09	-4.74735e-10	-3.10883e-09	-3.05808e-09	-3.45816e-09	-2.16256e-10	-6.12769e-10	-1.19882e-09	-1.47069e-09	-2.34615e-09	-1.72811e-09	-4.23774e-09	-1.66452e-09	-1.51606e-09	-2.22974e-09	-1.44044e-09	-2.11604e-09	-2.10929e-10	-1.0243e-09	-5.531e-10
8	-1.01202e-09	-8.51091e-10	-5.58394e-10	-5.22411e-10	-3.44726e-10	-1.41455e-09	-2.06225e-09	-1.79518e-09	-2.73313e-09	-4.03662e-09	-5.58394e-10	-3.80343e-09	-4.03903e-09	-4.58901e-09	-2.8328e-10	-7.53442e-10	-1.39276e-09	-1.9849e-09	-3.0983e-09	-2.32815e-09	-4.95082e-09	-2.11291e-09	-2.04381e-09	-2.83052e-09	-1.71403e-09	-2.46054e-09	-2.53367e-10	-1.30706e-09	-6.37707e-10
9	-1.16184e-09	-1.0778e-09	-6.35267e-10	-5.83729e-10	-4.16773e-10	-1.5969e-09	-2.41037e-09	-2.30584e-09	-3.3696e-09	-5.2942e-09	-6.35267e-10	-4.74557e-09	-5.09983e-09	-5.76102e-09	-3.55276e-10	-8.84294e-10	-1.59984e-09	-2.51189e-09	-3.92026e-09	-2.99036e-09	-5.5615e-09	-2.60061e-09	-2.64794e-09	-3.57177e-09	-2.05513e-09	-2.80565e-09	-3.01867e-10	-1.57359e-09	-8.22549e-10
10	-1.38495e-09	-1.20454e-09	-7.27131e-10	-6.43379e-10	-5.34604e-10	-1.77842e-09	-2.90783e-09	-3.00244e-09	-4.21043e-09	-6.6002e-09	-7.27131e-10	-5.69834e-09	-6.44481e-09	-7.26711e-09	-4.30057e-10	-1.03441e-09	-1.83011e-09	-3.04991e-09	-4.81335e-09	-3.72335e-09	-6.07999e-09	-3.22012e-09	-3.33593e-09	-4.39286e-09	-2.36758e-09	-3.15012e-09	-3.4741e-10	-1.96948e-09	-9.29191e-10
11	-1.55568e-09	-1.41945e-09	-8.2721e-10	-7.28588e-10	-6.55978e-10	-1.95408e-09	-3.26832e-09	-3.6159e-09	-5.05434e-09	-7.87173e-09	-8.2721e-10	-6.72113e-09	-7.75089e-09	-8.99459e-09	-5.24084e-10	-1.17645e-09	-2.03532e-09	-3.71133e-09	-5.70641e-09	-4.42697e-09	-6.51134e-09	-3.96377e-09	-4.12188e-09	-5.28771e-09	-2.72415e-09	-3.50895e-09	-3.93035e-10	-2.38702e-09	-1.02875e-09
12	-1.71326e-09	-1.75221e-09	-8.96783e-10	-7.88919e-10	-7.81227e-10	-2.13811e-09	-3.76354e-09	-4.23763e-09	-5.83871e-09	-9.35019e-09	-8.96783e-10	-8.01527e-09	-9.29056e-09	-1.05764e-08	-6.36311e-10	-1.29802e-09	-2.27022e-09	-4.39756e-09	-6.57773e-09	-5.23712e-09	-6.96507e-09	-4.58288e-09	-4.83231e-09	-6.13708e-09	-3.13581e-09	-3.85558e-09	-4.3516e-10	-2.79018e-09	-1.1713e-09
13	-1.90332e-09	-2.02607e-09	-9.78036e-10	-8.92239e-10	-9.39424e-10	-2.32739e-09	-4.24467e-09	-4.88607e-09	-6.69225e-09	-1.11799e-08	-9.78036e-10	-9.18752e-09	-1.08754e-08	-1.22145e-08	-7.27731e-10	-1.4403e-09	-2.50727e-09	-5.23938e-09	-7.5125e-09	-6.09825e-09	-7.44929e-09	-5.4467e-09	-5.57162e-09	-7.0238e-09	-3.57384e-09	-4.21719e-09	-4.84597e-10	-3.20248e-09	-1.2779e-09
14	-2.05931e-09	-2.25015e-09	-1.0741e-09	-9.47114e-10	-1.10322e-09	-2.51261e-09	-4.68078e-09	-5.50497e-09	-7.32358e-09	-1.27746e-08	-1.0741e-09	-1.03388e-08	-1.24854e-08	-1.40631e-08	-8.026e-10	-1.6241e-09	-2.78425e-09	-5.93412e-09	-8.4532e-09	-6.91875e-09	-8.02299e-09	-6.30983e-09	-6.40422e-09	-7.90677e-09	-3.96251e-09	-4.59878e-09	-5.35613e-10	-3.61106e-09	-1.42854e-09
15	-2.23216e-09	-2.58332e-09	-1.15309e-09	-9.99483e-10	-1.29403e-09	-2.70364e-09	-5.06248e-09	-6.2462e-09	-8.1483e-09	-1.44392e-08	-1.15309e-09	-1.1841e-08	-1.41852e-08	-1.5969e-08	-8.78401e-10	-1.78759e-09	-3.06925e-09	-6.65601e-09	-9.42859e-09	-7.74503e-09	-8.42857e-09	-7.33009e-09	-7.09443e-09	-8.85692e-09	-4.38996e-09	-4.99848e-09	-5.86613e-10	-3.99323e-09	-1.57675e-09
16	-2.45658e-09	-2.93335e-09	-1.23808e-09	-1.07817e-09	-1.48388e-09	-2.89251e-09	-5.54196e-09	-7.06836e-09	-9.05269e-09	-1.62213e-08	-1.23808e-09	-1.32222e-08	-1.58486e-08	-1.77273e-08	-9.773e-10	-1.94222e-09	-3.35902e-09	-7.29245e-09	-1.03296e-08	-8.54382e-09	-8.84324e-09	-8.30199e-09	-7.82225e-09	-9.83599e-09	-4.90959e-09	-5.40536e-09	-6.38302e-10	-4.34871e-09	-1.70961e-09
17	-2.69628e-09	-3.2691e-09	-1.30684e-09	-1.1313e-09	-1.66761e-09	-3.1142e-09	-6.04424e-09	-7.81286e-09	-9.85173e-09	-1.77178e-08	-1.30684e-09	-1.45911e-08	-1.77727e-08	-1.95807e-08	-1.15064e-09	-2.14888e-09	-3.63073e-09	-7.91348e-09	-1.1187e-08	-9.3462e-09	-9.19288e-09	-9.28334e-09	-8.56742e-09	-1.0695e-08	-5.36111e-09	-5.85628e-09	-6.88864e-10	-4.73991e-09	-1.84909e-09
18	-2.8994e-09	-3.71208e-09	-1.39306e-09	-1.17999e-09	-1.84024e-09	-3.30395e-09	-6.70885e-09	-8.51781e-09	-1.08173e-08	-1.92612e-08	-1.39306e-09	-1.61212e-08	-1.94958e-08	-2.13464e-08	-1.30402e-09	-2.32474e-09	-3.86299e-09	-8.47628e-09	-1.2085e-08	-1.00936e-08	-9.50535e-09	-1.02206e-08	-9.34362e-09	-1.15502e-08	-5.79529e-09	-6.27812e-09	-7.47114e-10	-5.14045e-09	-2.01911e-09
19	-3.13687e-09	-4.12009e-09	-1.48487e-09	-1.23108e-09	-2.00618e-09	-3.50738e-09	-7.20951e-09	-9.32542e-09	-1.16985e-08	-2.07291e-08	-1.48487e-09	-1.75811e-08	-2.12075e-08	-2.3066e-08	-1.42281e-09	-2.51187e-09	-4.12746e-09	-9.0686e-09	-1.30388e-08	-1.09994e-08	-9.86785e-09	-1.10058e-08	-1.00504e-08	-1.24699e-08	-6.28809e-09	-6.72087e-09	-8.15552e-10	-5.54206e-09	-2.19981e-09
20	-3.37826e-09	-4.56188e-09	-1.55539e-09	-1.29058e-09	-2.15187e-09	-3.7203e-09	-7.70408e-09	-1.01877e-08	-1.24956e-08	-2.23774e-08	-1.55539e-09	-1.91667e-08	-2.28546e-08	-2.48783e-08	-1.60266e-09	-2.70003e-09	-4.36447e-09	-9.68841e-09	-1.39265e-08	-1.1917e-08	-1.02383e-08	-1.20409e-08	-1.08137e-08	-1.341e-08	-6.79933e-09	-7.13256e-09	-8.74014e-10	-5.9893e-09	-2.39313e-09
21	-3.59883e-09	-4.92622e-09	-1.63759e-09	-1.38134e-09	-2.3516e-09	-3.91033e-09	-8.21875e-09	-1.09237e-08	-1.35092e-08	-2.38457e-08	-1.63759e-09	-2.06004e-08	-2.46469e-08	-2.65365e-08	-1.81887e-09	-2.92718e-09	-4.63052e-09	-1.02649e-08	-1.48286e-08	-1.26634e-08	-1.06634e-08	-1.29779e-08	-1.15594e-08	-1.42999e-08	-7.32059e-09	-7.61873e-09	-9.27826e-10	-6.4072e-09	-2.5721e-09
22	-3.85016e-09	-5.29451e-09	-1.72069e-09	-1.43413e-09	-2.49303e-09	-4.10117e-09	-8.6409e-09	-1.17383e-08	-1.4208e-08	-2.53993e-08	-1.72069e-09	-2.19978e-08	-2.64569e-08	-2.83278e-08	-1.96975e-09	-3.11431e-09	-4.89283e-09	-1.08603e-08	-1.56601e-08	-1.34716e-08	-1.1049e-08	-1.37861e-08	-1.21727e-08	-1.52344e-08	-7.86967e-09	-8.07634e-09	-9.99327e-10	-6.75295e-09	-2.77788e-09
23	-4.11855e-09	-5.76704e-09	-1.79391e-09	-1.48191e-09	-2.69505e-09	-4.31639e-09	-9.11114e-09	-1.24723e-08	-1.50543e-08	-2.70516e-08	-1.79391e-09	-2.36114e-08	-2.81241e-08	-3.01601e-08	-2.1286e-09	-3.30493e-09	-5.12088e-09	-1.15275e-08	-1.652e-08	-1.42052e-08	-1.1397e-08	-1.47037e-08	-1.29409e-08	-1.61605e-08	-8.3718e-09	-8.52668e-09	-1.06395e-09	-7.14021e-09	-2.92633e-09
24	-4.34783e-09	-6.1614e-09	-1.87218e-09	-1.53218e-09	-2.87237e-09	-4.52531e-09	-9.70105e-09	-1.32381e-08	-1.59097e-08	-2.86727e-08	-1.87218e-09	-2.51444e-08	-2.98084e-08	-3.17404e-08	-2.26808e-09	-3.49908e-09	-5.38862e-09	-1.20726e-08	-1.74014e-08	-1.49248e-08	-1.18449e-08	-1.55715e-08	-1.37315e-08	-1.70629e-08	-8.85653e-09	-8.98596e-09	-1.12545e-09	-7.47406e-09	-3.10133e-09
25	-4.64396e-09	-6.53589e-09	-1.95658e-09	-1.59979e-09	-3.03216e-09	-4.71384e-09	-1.01631e-08	-1.40132e-08	-1.66654e-08	-3.02228e-08	-1.95658e-09	-2.67126e-08	-3.13995e-08	-3.34007e-08	-2.41059e-09	-3.67219e-09	-5.61933e-09	-1.27603e-08	-1.82299e-08	-1.57017e-08	-1.22957e-08	-1.64643e-08	-1.44361e-08	-1.79627e-08	-9.26752e-09	-9.41675e-09	-1.18982e-09	-7.823e-09	-3.31069e-09
26	-4.92024e-09	-6.90147e-09	-2.04718e-09	-1.64349e-09	-3.21542e-09	-4.91302e-09	-1.0653e-08	-1.47787e-08	-1.7331e-08	-3.16868e-08	-2.04718e-09	-2.81185e-08	-3.29962e-08	-3.51468e-08	-2.58726e-09	-3.88432e-09	-5.87798e-09	-1.33442e-08	-1.90469e-08	-1.6496e-08	-1.2616e-08	-1.73505e-08	-1.50433e-08	-1.88744e-08	-9.71102e-09	-9.84947e-09	-1.24881e-09	-8.1692e-09	-3.44482e-09
27	-5.1729e-09	-7.21571e-09	-2.09603e-09	-1.88014e-09	-3.40219e-09	-5.13439e-09	-1.1015e-08	-1.54647e-08	-1.81579e-08	-3.31447e-08	-2.09603e-09	-2.96122e-08	-3.4695e-08	-3.68193e-08	-2.76109e-09	-4.09769e-09	-6.13666e-09	-1.39063e-08	-1.98686e-08	-1.72992e-08	-1.29742e-08	-1.82113e-08	-1.5817e-08	-1.97824e-08	-1.01699e-08	-1.02649e-08	-1.32306e-09	-8.51887e-09	-3.62159e-09
28	-5.39038e-09	-7.57405e-09	-2.18265e-09	-1.92773e-09	-3.57095e-09	-5.33369e-09	-1.1507e-08	-1.60987e-08	-1.88912e-08	-3.46275e-08	-2.18265e-09	-3.10405e-08	-3.64065e-08	-3.85369e-08	-2.91671e-09	-4.2845e-09	-6.40574e-09	-1.44218e-08	-2.07177e-08	-1.80375e-08	-1.33053e-08	-1.90362e-08	-1.6516e-08	-2.06388e-08	-1.05821e-08	-1.06803e-08	-1.38487e-09	-8.8695e-09	-3.78728e-09
29	-5.60865e-09	-7.9193e-09	-2.2458e-09	-1.97703e-09	-3.71236e-09	-5.52525e-09	-1.22149e-08	-1.67416e-08	-1.96477e-08	-3.62032e-08	-2.2458e-09	-3.27335e-08	-3.8089e-08	-4.02125e-08	-3.06677e-09	-4.47857e-09	-6.62454e-09	-1.4916e-08	-2.16033e-08	-1.88396e-08	-1.36318e-08	-1.98186e-08	-1.71737e-08	-2.15299e-08	-1.10182e-08	-1.11676e-08	-1.44656e-09	-9.1905e-09	-3.96433e-09
30	-5.90409e-09	-8.23553e-09	-2.32257e-09	-2.01867e-09	-3.87782e-09	-5.72892e-09	-1.25733e-08	-1.75366e-08	-2.04201e-08	-3.7565e-08	-2.32257e-09	-3.43328e-08	-3.97268e-08	-4.19426e-08	-3.21237e-09	-4.70986e-09	-6.91882e-09	-1.54737e-08	-2.25366e-08	-1.95545e-08	-1.40432e-08	-2.06333e-08	-1.7818e-08	-2.23383e-08	-1.14818e-08	-1.16068e-08	-1.52349e-09	-9.54465e-09	-4.16011e-09
31	-6.1167e-09	-8.54804e-09	-2.3911e-09	-2.06827e-09	-4.05465e-09	-5.91864e-09	-1.32164e-08	-1.82361e-08	-2.11065e-08	-3.9085e-08	-2.3911e-09	-3.58784e-08	-4.13858e-08	-4.3575e-08	-3.37716e-09	-4.89567e-09	-7.17365e-09	-1.60938e-08	-2.33778e-08	-2.02788e-08	-1.44525e-08	-2.144e-08	-1.85056e-08	-2.32071e-08	-1.19854e-08	-1.20781e-08	-1.60399e-09	-9.88164e-09	-4.38031e-09
32	-6.3887e-09	-8.9709e-09	-2.44974e-09	-2.10833e-09	-4.20192e-09	-6.1141e-09	-1.34803e-08	-1.90231e-08	-2.18876e-08	-4.04293e-08	-2.44974e-09	-3.74942e-08	-4.31407e-08	-4.52233e-08	-3.49642e-09	-5.1197e-09	-7.45098e-09	-1.66874e-08	-2.42419e-08	-2.10401e-08	-1.48756e-08	-2.21315e-08	-1.91458e-08	-2.39594e-08	-1.24905e-08	-1.25011e-08	-1.68155e-09	-1.03268e-08	-4.605e-09
33	-6.64972e-09	-9.30381e-09	-2.50008e-09	-2.15088e-09	-4.36121e-09	-6.3115e-09	-1.39809e-08	-1.96763e-08	-2.25283e-08	-4.18311e-08	-2.50008e-09	-3.89664e-08	-4.47864e-08	-4.67886e-08	-3.63402e-09	-5.31909e-09	-7.68099e-09	-1.72668e-08	-2.50971e-08	-2.18011e-08	-1.52597e-08	-2.29258e-08	-1.98562e-08	-2.48099e-08	-1.3026e-08	-1.29246e-08	-1.75355e-09	-1.06895e-08	-4.76436e-09
34	-6.91853e-09	-9.62924e-09	-2.56225e-09	-2.19061e-09	-4.47216e-09	-6.49305e-09	-1.45893e-08	-2.04686e-08	-2.31262e-08	-4.33057e-08	-2.56225e-09	-4.04236e-08	-4.63875e-08	-4.83751e-08	-3.80192e-09	-5.47606e-09	-7.90519e-09	-1.78037e-08	-2.59336e-08	-2.25162e-08	-1.5574e-08	-2.37641e-08	-2.05491e-08	-2.56507e-08	-1.35853e-08	-1.33195e-08	-1.82212e-09	-1.1024e-08	-4.97315e-09
35	-7.18265e-09	-1.00303e-08	-2.62158e-09	-2.23487e-09	-4.6464e-09	-6.69221e-09	-1.50597e-08	-2.12651e-08	-2.37556e-08	-4.46488e-08	-2.62158e-09	-4.19912e-08	-4.80969e-08	-5.00559e-08	-3.92486e-09	-5.67736e-09	-8.13902e-09	-1.83347e-08	-2.68199e-08	-2.32072e-08	-1.59355e-08	-2.46386e-08	-2.12263e-08	-2.64863e-08	-1.40972e-08	-1.37339e-08	-1.90412e-09	-1.13721e-08	-5.1943e-09
36	-7.43675e-09	-1.02855e-08	-2.6668e-09	-2.27693e-09	-4.78488e-09	-6.91409e-09	-1.5693e-08	-2.19209e-08	-2.4375e-08	-4.60727e-08	-2.6668e-09	-4.3564e-08	-4.96983e-08	-5.17632e-08	-4.1002e-09	-5.8854e-09	-8.36605e-09	-1.88405e-08	-2.77257e-08	-2.39232e-08	-1.63256e-08	-2.54093e-08	-2.19442e-08	-2.7336e-08	-1.46002e-08	-1.41557e-08	-1.97968e-09	-1.17217e-08	-5.42592e-09
37	-7.69833e-09	-1.05979e-08	-2.74183e-09	-2.31946e-09	-4.92735e-09	-7.13905e-09	-1.60257e-08	-2.25753e-08	-2.50359e-08	-4.74263e-08	-2.74183e-09	-4.50356e-08	-5.1303e-08	-5.34971e-08	-4.27066e-09	-6.07232e-09	-8.61885e-09	-1.93603e-08	-2.85781e-08	-2.46816e-08	-1.66533e-08	-2.63304e-08	-2.26026e-08	-2.81661e-08	-1.51307e-08	-1.45535e-08	-2.04237e-09	-1.21376e-08	-5.6081e-09
38	-7.9849e-09	-1.09054e-08	-2.80354e-09	-2.36197e-09	-5.08011e-09	-7.33891e-09	-1.64124e-08	-2.32521e-08	-2.56008e-08	-4.87893e-08	-2.80354e-09	-4.66227e-08	-5.28277e-08	-5.51552e-08	-4.4291e-09	-6.28869e-09	-8.83729e-09	-1.99557e-08	-2.93932e-08	-2.54009e-08	-1.70089e-08	-2.707e-08	-2.33174e-08	-2.9044e-08	-1.562e-08	-1.4943e-08	-2.11981e-09	-1.24898e-08	-5.83226e-09
39	-8.29302e-09	-1.12488e-08	-2.88396e-09	-2.40308e-09	-5.22003e-09	-7.55703e-09	-1.67991e-08	-2.3947e-08	-2.64642e-08	-5.00381e-08	-2.88396e-09	-4.82445e-08	-5.46368e-08	-5.69018e-08	-4.56893e-09	-6.48117e-09	-9.05442e-09	-2.05053e-08	-3.02354e-08	-2.6137e-08	-1.737e-08	-2.79098e-08	-2.40554e-08	-2.99235e-08	-1.61734e-08	-1.53599e-08	-2.19468e-09	-1.27911e-08	-6.01561e-09
40	-8.51424e-09	-1.15301e-08	-2.93193e-09	-2.46238e-09	-5.3304e-09	-7.74703e-09	-1.72408e-08	-2.48285e-08	-2.71631e-08	-5.16073e-08	-2.93193e-09	-4.97356e-08	-5.62704e-08	-5.85731e-08	-4.72308e-09	-6.67619e-09	-9.29296e-09	-2.11042e-08	-3.1029e-08	-2.68854e-08	-1.78063e-08	-2.86554e-08	-2.46769e-08	-3.07821e-08	-1.67423e-08	-1.57186e-08	-2.27831e-09	-1.31379e-08	-6.19749e-09
41	-8.70733e-09	-1.18117e-08	-2.99587e-09	-2.50003e-09	-5.45043e-09	-7.92894e-09	-1.77794e-08	-2.55526e-08	-2.77458e-08	-5.30393e-08	-2.99587e-09	-5.1307e-08	-5.79135e-08	-6.02184e-08	-4.88078e-09	-6.90077e-09	-9.50979e-09	-2.16718e-08	-3.18751e-08	-2.75977e-08	-1.82713e-08	-2.94354e-08	-2.54014e-08	-3.16718e-08	-1.7331e-08	-1.60763e-08	-2.34512e-09	-1.34374e-08	-6.37786e-09
42	-8.93696e-09	-1.20522e-08	-3.07103e-09	-2.5433e-09	-5.57512e-09	-8.14922e-09	-1.83606e-08	-2.63273e-08	-2.83393e-08	-5.45763e-08	-3.07103e-09	-5.27984e-08	-5.9519e-08	-6.19491e-08	-5.01489e-09	-7.12885e-09	-9.75339e-09	-2.21977e-08	-3.27104e-08	-2.83795e-08	-1.85941e-08	-3.02231e-08	-2.60539e-08	-3.24563e-08	-1.78194e-08	-1.6443e-08	-2.42137e-09	-1.37864e-08	-6.56284e-09
43	-9.24783e-09	-1.23804e-08	-3.15224e-09	-2.58187e-09	-5.68332e-09	-8.33194e-09	-1.86484e-08	-2.70694e-08	-2.90104e-08	-5.5832e-08	-3.15224e-09	-5.42417e-08	-6.11709e-08	-6.36433e-08	-5.16812e-09	-7.32414e-09	-9.97169e-09	-2.27267e-08	-3.35596e-08	-2.90819e-08	-1.89721e-08	-3.10362e-08	-2.67812e-08	-3.33249e-08	-1.8395e-08	-1.68109e-08	-2.51243e-09	-1.41153e-08	-6.77593e-09
44	-9.52462e-09	-1.26253e-08	-3.24447e-09	-2.61747e-09	-5.80282e-09	-8.52697e-09	-1.90988e-08	-2.78533e-08	-2.95748e-08	-5.70111e-08	-3.24447e-09	-5.57727e-08	-6.27878e-08	-6.52248e-08	-5.31943e-09	-7.48066e-09	-1.01883e-08	-2.33024e-08	-3.43875e-08	-2.97698e-08	-1.93002e-08	-3.18464e-08	-2.74992e-08	-3.4169e-08	-1.88678e-08	-1.71799e-08	-2.58143e-09	-1.4488e-08	-6.99225e-09
45	-9.7589e-09	-1.29133e-08	-3.31404e-09	-2.66072e-09	-5.94322e-09	-8.74284e-09	-1.95583e-08	-2.85635e-08	-3.03201e-08	-5.85439e-08	-3.31404e-09	-5.72477e-08	-6.4319e-08	-6.68262e-08	-5.46031e-09	-7.69276e-09	-1.03882e-08	-2.38578e-08	-3.52059e-08	-3.04813e-08	-1.96965e-08	-3.26997e-08	-2.81561e-08	-3.50446e-08	-1.94203e-08	-1.74885e-08	-2.66374e-09	-1.4848e-08	-7.22263e-09
46	-1.00669e-08	-1.31964e-08	-3.39207e-09	-2.69396e-09	-6.05078e-09	-8.94879e-09	-1.98976e-08	-2.92204e-08	-3.10248e-08	-5.98402e-08	-3.39207e-09	-5.86404e-08	-6.58941e-08	-6.84469e-08	-5.62503e-09	-7.8649e-09	-1.06079e-08	-2.44283e-08	-3.59573e-08	-3.12117e-08	-2.00599e-08	-3.35006e-08	-2.8834e-08	-3.58608e-08	-1.99337e-08	-1.7852e-08	-2.74468e-09	-1.5194e-08	-7.42861e-09
47	-1.0304e-08	-1.34929e-08	-3.46969e-09	-2.73204e-09	-6.13226e-09	-9.14032e-09	-2.02476e-08	-2.99821e-08	-3.14857e-08	-6.12774e-08	-3.46969e-09	-6.01389e-08	-6.7505e-08	-7.01082e-08	-5.75313e-09	-8.0437e-09	-1.08575e-08	-2.49392e-08	-3.67974e-08	-3.19942e-08	-2.03626e-08	-3.43189e-08	-2.94975e-08	-3.67362e-08	-2.04848e-08	-1.82053e-08	-2.84262e-09	-1.55037e-08	-7.63295e-09
48	-1.05895e-08	-1.3731e-08	-3.53165e-09	-2.76886e-09	-6.25785e-09	-9.35158e-09	-2.07697e-08	-3.06846e-08	-3.21134e-08	-6.25242e-08	-3.53165e-09	-6.16841e-08	-6.91798e-08	-7.16419e-08	-5.90429e-09	-8.20901e-09	-1.10641e-08	-2.54658e-08	-3.75965e-08	-3.27052e-08	-2.06762e-08	-3.51126e-08	-3.02241e-08	-3.75533e-08	-2.09902e-08	-1.85692e-08	-2.93212e-09	-1.59091e-08	-7.86997e-09
49	-1.08518e-08	-1.39417e-08	-3.58701e-09	-2.81083e-09	-6.38894e-09	-9.58329e-09	-2.1328e-08	-3.14457e-08	-3.28902e-08	-6.39229e-08	-3.58701e-09	-6.32449e-08	-7.09151e-08	-7.31495e-08	-6.0899e-09	-8.41269e-09	-1.13002e-08	-2.59875e-08	-3.83733e-08	-3.34768e-08	-2.10323e-08	-3.59134e-08	-3.09049e-08	-3.84166e-08	-2.14502e-08	-1.89271e-08	-3.02568e-09	-1.61923e-08	-8.05822e-09
50	-1.10779e-08	-1.42299e-08	-3.66215e-09	-2.84779e-09	-6.5011e-09	-9.77068e-09	-2.17313e-08	-3.21449e-08	-3.34235e-08	-6.52129e-08	-3.66215e-09	-6.47584e-08	-7.24683e-08	-7.47969e-08	-6.24389e-09	-8.57656e-09	-1.16231e-08	-2.64826e-08	-3.9131e-08	-3.41677e-08	-2.13707e-08	-3.66826e-08	-3.15591e-08	-3.93069e-08	-2.19539e-08	-1.92674e-08	-3.11831e-09	-1.656e-08	-8.23576e-09
51	-1.13189e-08	-1.44682e-08	-3.71119e-09	-2.88099e-09	-6.6237e-09	-9.9668e-09	-2.23199e-08	-3.28847e-08	-3.39563e-08	-6.66725e-08	-3.71119e-09	-6.62279e-08	-7.42217e-08	-7.63241e-08	-6.39071e-09	-8.73777e-09	-1.18377e-08	-2.69844e-08	-3.98926e-08	-3.48614e-08	-2.17211e-08	-3.74644e-08	-3.23089e-08	-4.02094e-08	-2.24477e-08	-1.9613e-08	-3.21268e-09	-1.68746e-08	-8.41592e-09
52	-1.16e-08	-1.47071e-08	-3.76799e-09	-2.92476e-09	-6.7266e-09	-1.01672e-08	-2.28784e-08	-3.36724e-08	-3.46911e-08	-6.79555e-08	-3.76799e-09	-6.77187e-08	-7.59459e-08	-7.77816e-08	-6.51089e-09	-8.931e-09	-1.20483e-08	-2.75058e-08	-4.06906e-08	-3.55461e-08	-2.20455e-08	-3.82668e-08	-3.30261e-08	-4.11344e-08	-2.29023e-08	-1.99461e-08	-3.31475e-09	-1.7177e-08	-8.62082e-09
53	-1.18629e-08	-1.49788e-08	-3.8196e-09	-2.96045e-09	-6.84259e-09	-1.03668e-08	-2.34629e-08	-3.42671e-08	-3.53218e-08	-6.94192e-08	-3.8196e-09	-6.92733e-08	-7.75364e-08	-7.93359e-08	-6.66186e-09	-9.14079e-09	-1.227e-08	-2.8078e-08	-4.14709e-08	-3.62909e-08	-2.23601e-08	-3.91324e-08	-3.37168e-08	-4.19857e-08	-2.34524e-08	-2.02383e-08	-3.38868e-09	-1.74838e-08	-8.83394e-09
54	-1.20893e-08	-1.52256e-08	-3.86743e-09	-2.99697e-09	-6.96158e-09	-1.05623e-08	-2.38429e-08	-3.50221e-08	-3.58865e-08	-7.07078e-08	-3.86743e-09	-7.07168e-08	-7.91993e-08	-8.10392e-08	-6.80649e-09	-9.3805e-09	-1.24985e-08	-2.85648e-08	-4.23047e-08	-3.6981e-08	-2.2657e-08	-3.99258e-08	-3.45199e-08	-4.28497e-08	-2.39407e-08	-2.05722e-08	-3.47268e-09	-1.78316e-08	-9.03268e-09
55	-1.23188e-08	-1.54687e-08	-3.92834e-09	-3.03374e-09	-7.08378e-09	-1.07942e-08	-2.43954e-08	-3.58063e-08	-3.64303e-08	-7.18801e-08	-3.92834e-09	-7.21601e-08	-8.08027e-08	-8.25988e-08	-6.96776e-09	-9.54209e-09	-1.27192e-08	-2.91036e-08	-4.30932e-08	-3.76779e-08	-2.2946e-08	-4.08642e-08	-3.52512e-08	-4.36662e-08	-2.4483e-08	-2.09205e-08	-3.55393e-09	-1.80791e-08	-9.21391e-09
56	-1.25363e-08	-1.57184e-08	-3.99016e-09	-3.06894e-09	-7.2083e-09	-1.10476e-08	-2.49641e-08	-3.65006e-08	-3.69994e-08	-7.30393e-08	-3.99016e-09	-7.36135e-08	-8.24753e-08	-8.42875e-08	-7.09594e-09	-9.72756e-09	-1.29369e-08	-2.96785e-08	-4.38638e-08	-3.83561e-08	-2.32497e-08	-4.16707e-08	-3.59259e-08	-4.45018e-08	-2.49944e-08	-2.12047e-08	-3.64318e-09	-1.83752e-08	-9.4015e-09
57	-1.27714e-08	-1.58956e-08	-4.04084e-09	-3.19617e-09	-7.31967e-09	-1.12528e-08	-2.55485e-08	-3.72464e-08	-3.77421e-08	-7.44092e-08	-4.04084e-09	-7.50476e-08	-8.41508e-08	-8.58016e-08	-7.21384e-09	-9.90519e-09	-1.31539e-08	-3.02163e-08	-4.4656e-08	-3.90267e-08	-2.3532e-08	-4.2446e-08	-3.6564e-08	-4.53318e-08	-2.55299e-08	-2.15094e-08	-3.73718e-09	-1.87128e-08	-9.58408e-09
58	-1.30242e-08	-1.62163e-08	-4.10086e-09	-3.29588e-09	-7.40429e-09	-1.14532e-08	-2.60137e-08	-3.79344e-08	-3.82943e-08	-7.56127e-08	-4.10086e-09	-7.64225e-08	-8.57828e-08	-8.74625e-08	-7.3996e-09	-1.00488e-08	-1.33705e-08	-3.08541e-08	-4.5449e-08	-3.96693e-08	-2.37891e-08	-4.32427e-08	-3.72151e-08	-4.61937e-08	-2.60896e-08	-2.18379e-08	-3.84818e-09	-1.90226e-08	-9.79982e-09
59	-1.32736e-08	-1.64776e-08	-4.15662e-09	-3.33887e-09	-7.51202e-09	-1.16462e-08	-2.64308e-08	-3.86014e-08	-3.88448e-08	-7.70265e-08	-4.15662e-09	-7.80354e-08	-8.74049e-08	-8.90204e-08	-7.60162e-09	-1.0211e-08	-1.35954e-08	-3.14353e-08	-4.62296e-08	-4.0385e-08	-2.4047e-08	-4.41186e-08	-3.79144e-08	-4.7056e-08	-2.65904e-08	-2.21256e-08	-3.93825e-09	-1.93465e-08	-9.99692e-09
60	-1.35355e-08	-1.66937e-08	-4.22062e-09	-3.37754e-09	-7.62954e-09	-1.18579e-08	-2.69532e-08	-3.93534e-08	-3.94156e-08	-7.81792e-08	-4.22062e-09	-7.94964e-08	-8.89499e-08	-9.0571e-08	-7.73245e-09	-1.03795e-08	-1.38047e-08	-3.19712e-08	-4.70084e-08	-4.10494e-08	-2.43731e-08	-4.499e-08	-3.87035e-08	-4.78343e-08	-2.72085e-08	-2.24093e-08	-4.02293e-09	-1.97067e-08	-1.01632e-08
61	-1.38029e-08	-1.70292e-08	-4.27787e-09	-3.42489e-09	-7.74878e-09	-1.20483e-08	-2.73543e-08	-4.0047e-08	-3.98763e-08	-7.94605e-08	-4.27787e-09	-8.10996e-08	-9.05195e-08	-9.20341e-08	-7.86978e-09	-1.05591e-08	-1.39954e-08	-3.25223e-08	-4.78147e-08	-4.16511e-08	-2.46811e-08	-4.57481e-08	-3.93643e-08	-4.86649e-08	-2.77021e-08	-2.2718e-08	-4.1145e-09	-2.0061e-08	-1.03569e-08
62	-1.40223e-08	-1.72891e-08	-4.33382e-09	-3.46755e-09	-7.84456e-09	-1.22724e-08	-2.78132e-08	-4.08439e-08	-4.02733e-08	-8.06774e-08	-4.33382e-09	-8.26451e-08	-9.22055e-08	-9.35124e-08	-7.98666e-09	-1.07628e-08	-1.41877e-08	-3.30778e-08	-4.85912e-08	-4.23018e-08	-2.50189e-08	-4.66446e-08	-4.01134e-08	-4.94952e-08	-2.82883e-08	-2.30209e-08	-4.19893e-09	-2.04285e-08	-1.0535e-08
63	-1.4291e-08	-1.74769e-08	-4.38146e-09	-3.50145e-09	-7.94156e-09	-1.24893e-08	-2.82571e-08	-4.16698e-08	-4.06691e-08	-8.21186e-08	-4.38146e-09	-8.41046e-08	-9.3799e-08	-9.49824e-08	-8.11576e-09	-1.09651e-08	-1.44122e-08	-3.35888e-08	-4.93135e-08	-4.29596e-08	-2.53614e-08	-4.75349e-08	-4.08111e-08	-5.02971e-08	-2.88686e-08	-2.32973e-08	-4.28337e-09	-2.08084e-08	-1.07358e-08
64	-1.45203e-08	-1.7684e-08	-4.42155e-09	-3.53706e-09	-8.03261e-09	-1.2704e-08	-2.86135e-08	-4.23328e-08	-4.11901e-08	-8.34846e-08	-4.42155e-09	-8.55157e-08	-9.52672e-08	-9.65597e-08	-8.22071e-09	-1.11521e-08	-1.4638e-08	-3.41123e-08	-5.01077e-08	-4.36658e-08	-2.56613e-08	-4.84212e-08	-4.14827e-08	-5.1143e-08	-2.93409e-08	-2.35924e-08	-4.39938e-09	-2.10494e-08	-1.08929e-08
65	-1.47258e-08	-1.79237e-08	-4.49006e-09	-3.57001e-09	-8.13378e-09	-1.2947e-08	-2.91505e-08	-4.31415e-08	-4.17339e-08	-8.46708e-08	-4.49006e-09	-8.69365e-08	-9.68175e-08	-9.81099e-08	-8.3409e-09	-1.13073e-08	-1.48665e-08	-3.46637e-08	-5.08739e-08	-4.43672e-08	-2.59582e-08	-4.91781e-08	-4.2145e-08	-5.19955e-08	-2.98561e-08	-2.38894e-08	-4.5022e-09	-2.13382e-08	-1.10822e-08
66	-1.49045e-08	-1.8125e-08	-4.56165e-09	-3.60674e-09	-8.27119e-09	-1.31514e-08	-2.97596e-08	-4.39101e-08	-4.22651e-08	-8.6022e-08	-4.56165e-09	-8.84297e-08	-9.83606e-08	-9.96421e-08	-8.51571e-09	-1.1488e-08	-1.50979e-08	-3.51715e-08	-5.16446e-08	-4.49887e-08	-2.63062e-08	-4.98546e-08	-4.28689e-08	-5.28301e-08	-3.03041e-08	-2.41985e-08	-4.58026e-09	-2.16736e-08	-1.12285e-08
67	-1.51781e-08	-1.84388e-08	-4.6121e-09	-3.64624e-09	-8.3609e-09	-1.33545e-08	-3.03084e-08	-4.47796e-08	-4.27771e-08	-8.72219e-08	-4.6121e-09	-8.99341e-08	-9.99289e-08	-1.01087e-07	-8.67266e-09	-1.16633e-08	-1.52913e-08	-3.56817e-08	-5.23737e-08	-4.56871e-08	-2.65671e-08	-5.06193e-08	-4.36224e-08	-5.36454e-08	-3.08047e-08	-2.446e-08	-4.65845e-09	-2.19918e-08	-1.14015e-08
68	-1.53774e-08	-1.86652e-08	-4.66143e-09	-3.69401e-09	-8.46154e-09	-1.35621e-08	-3.08368e-08	-4.55135e-08	-4.3226e-08	-8.84178e-08	-4.66143e-09	-9.13987e-08	-1.01483e-07	-1.02653e-07	-8.81219e-09	-1.18444e-08	-1.55009e-08	-3.61581e-08	-5.3107e-08	-4.64247e-08	-2.68667e-08	-5.13864e-08	-4.43348e-08	-5.45679e-08	-3.13456e-08	-2.47432e-08	-4.74863e-09	-2.22976e-08	-1.15945e-08
69	-1.55982e-08	-1.88701e-08	-4.71775e-09	-3.72974e-09	-8.57544e-09	-1.37535e-08	-3.11802e-08	-4.62789e-08	-4.37541e-08	-8.96214e-08	-4.71775e-09	-9.2796e-08	-1.03028e-07	-1.04083e-07	-8.9668e-09	-1.20334e-08	-1.57131e-08	-3.66993e-08	-5.38728e-08	-4.70767e-08	-2.71731e-08	-5.22478e-08	-4.50016e-08	-5.54317e-08	-3.18578e-08	-2.50014e-08	-4.8397e-09	-2.25837e-08	-1.17771e-08
70	-1.58174e-08	-1.91315e-08	-4.76246e-09	-3.76531e-09	-8.65587e-09	-1.39475e-08	-3.1613e-08	-4.69657e-08	-4.42105e-08	-9.08354e-08	-4.76246e-09	-9.42514e-08	-1.04534e-07	-1.05472e-07	-9.09411e-09	-1.21664e-08	-1.59392e-08	-3.71521e-08	-5.46383e-08	-4.77311e-08	-2.75201e-08	-5.2965e-08	-4.56758e-08	-5.62937e-08	-3.23196e-08	-2.5263e-08	-4.94295e-09	-2.28958e-08	-1.19385e-08
71	-1.60663e-08	-1.93261e-08	-4.82184e-09	-3.80384e-09	-8.76456e-09	-1.41436e-08	-3.21858e-08	-4.76562e-08	-4.48063e-08	-9.21003e-08	-4.82184e-09	-9.57953e-08	-1.06113e-07	-1.07003e-07	-9.23975e-09	-1.23333e-08	-1.61789e-08	-3.76252e-08	-5.54159e-08	-4.84292e-08	-2.77931e-08	-5.37898e-08	-4.64736e-08	-5.71426e-08	-3.27952e-08	-2.55225e-08	-5.04545e-09	-2.31307e-08	-1.20941e-08
72	-1.62506e-08	-1.96158e-08	-4.88086e-09	-3.96893e-09	-8.86619e-09	-1.43462e-08	-3.26803e-08	-4.84055e-08	-4.51529e-08	-9.32939e-08	-4.88086e-09	-9.72496e-08	-1.07654e-07	-1.08438e-07	-9.41066e-09	-1.25271e-08	-1.63664e-08	-3.81394e-08	-5.61765e-08	-4.90651e-08	-2.81038e-08	-5.46173e-08	-4.70965e-08	-5.79883e-08	-3.33752e-08	-2.57707e-08	-5.13324e-09	-2.35801e-08	-1.2256e-08
73	-1.64326e-08	-1.98926e-08	-4.94968e-09	-4.00854e-09	-8.96765e-09	-1.4526e-08	-3.30993e-08	-4.91512e-08	-4.56018e-08	-9.45209e-08	-4.94968e-09	-9.8614e-08	-1.09315e-07	-1.09834e-07	-9.52313e-09	-1.26792e-08	-1.66039e-08	-3.86327e-08	-5.68837e-08	-4.96853e-08	-2.83634e-08	-5.54209e-08	-4.78054e-08	-5.88361e-08	-3.3884e-08	-2.60498e-08	-5.2173e-09	-2.39532e-08	-1.24421e-08
74	-1.65949e-08	-2.01792e-08	-5.02113e-09	-4.13533e-09	-9.05686e-09	-1.47599e-08	-3.36595e-08	-4.98821e-08	-4.59421e-08	-9.56669e-08	-5.02113e-09	-1.00077e-07	-1.10831e-07	-1.11397e-07	-9.63296e-09	-1.28366e-08	-1.68408e-08	-3.91504e-08	-5.76724e-08	-5.03487e-08	-2.86621e-08	-5.62054e-08	-4.84204e-08	-5.96662e-08	-3.44238e-08	-2.63003e-08	-5.3048e-09	-2.42499e-08	-1.2617e-08
75	-1.68034e-08	-2.04168e-08	-5.07191e-09	-4.19039e-09	-9.19077e-09	-1.49703e-08	-3.40993e-08	-5.06197e-08	-4.64481e-08	-9.69128e-08	-5.07191e-09	-1.01467e-07	-1.12449e-07	-1.12983e-07	-9.74634e-09	-1.29917e-08	-1.70666e-08	-3.9693e-08	-5.84538e-08	-5.1002e-08	-2.8893e-08	-5.69519e-08	-4.91327e-08	-6.04992e-08	-3.49029e-08	-2.65359e-08	-5.38518e-09	-2.46178e-08	-1.28076e-08
76	-1.69911e-08	-2.06675e-08	-5.12884e-09	-4.22202e-09	-9.26276e-09	-1.51992e-08	-3.45744e-08	-5.12975e-08	-4.69018e-08	-9.81376e-08	-5.12884e-09	-1.02934e-07	-1.14019e-07	-1.1447e-07	-9.87204e-09	-1.31556e-08	-1.73035e-08	-4.01436e-08	-5.92322e-08	-5.16629e-08	-2.92306e-08	-5.77461e-08	-4.98451e-08	-6.13904e-08	-3.5406e-08	-2.67631e-08	-5.48455e-09	-2.49045e-08	-1.29239e-08
77	-1.71762e-08	-2.09138e-08	-5.18048e-09	-4.26394e-09	-9.40318e-09	-1.53741e-08	-3.51479e-08	-5.20801e-08	-4.72414e-08	-9.91991e-08	-5.18048e-09	-1.04407e-07	-1.15522e-07	-1.15917e-07	-9.96956e-09	-1.33277e-08	-1.75138e-08	-4.06498e-08	-5.99789e-08	-5.23276e-08	-2.95338e-08	-5.85409e-08	-5.04568e-08	-6.22111e-08	-3.59901e-08	-2.69962e-08	-5.56643e-09	-2.52246e-08	-1.30514e-08
78	-1.73625e-08	-2.11203e-08	-5.23311e-09	-4.3007e-09	-9.49061e-09	-1.55838e-08	-3.55174e-08	-5.27621e-08	-4.77645e-08	-1.0039e-07	-5.23311e-09	-1.05865e-07	-1.17042e-07	-1.17396e-07	-1.00894e-08	-1.34746e-08	-1.77051e-08	-4.11719e-08	-6.07053e-08	-5.29085e-08	-2.98296e-08	-5.9319e-08	-5.11148e-08	-6.30693e-08	-3.65373e-08	-2.72517e-08	-5.67749e-09	-2.55364e-08	-1.32416e-08
79	-1.75459e-08	-2.13995e-08	-5.29765e-09	-4.33559e-09	-9.54879e-09	-1.57755e-08	-3.6098e-08	-5.35031e-08	-4.82519e-08	-1.01744e-07	-5.29765e-09	-1.07163e-07	-1.18609e-07	-1.18804e-07	-1.0205e-08	-1.36434e-08	-1.79091e-08	-4.16086e-08	-6.14449e-08	-5.35776e-08	-3.00609e-08	-6.00875e-08	-5.1818e-08	-6.38593e-08	-3.70775e-08	-2.74737e-08	-5.76261e-09	-2.5977e-08	-1.33818e-08
80	-1.77862e-08	-2.16751e-08	-5.37699e-09	-4.37786e-09	-9.61758e-09	-1.59874e-08	-3.65777e-08	-5.42298e-08	-4.85502e-08	-1.02909e-07	-5.37699e-09	-1.08556e-07	-1.20163e-07	-1.20213e-07	-1.03109e-08	-1.38056e-08	-1.81241e-08	-4.20665e-08	-6.22228e-08	-5.42466e-08	-3.04e-08	-6.08022e-08	-5.24656e-08	-6.47064e-08	-3.75714e-08	-2.77138e-08	-5.85018e-09	-2.62439e-08	-1.35214e-08
81	-1.79697e-08	-2.19373e-08	-5.44224e-09	-4.50054e-09	-9.71978e-09	-1.62091e-08	-3.71352e-08	-5.49149e-08	-4.89284e-08	-1.04057e-07	-5.44224e-09	-1.09859e-07	-1.21605e-07	-1.21602e-07	-1.04478e-08	-1.39605e-08	-1.83272e-08	-4.25282e-08	-6.29279e-08	-5.4911e-08	-3.07417e-08	-6.14475e-08	-5.32493e-08	-6.55336e-08	-3.8135e-08	-2.79349e-08	-5.93774e-09	-2.65735e-08	-1.36925e-08
82	-1.8125e-08	-2.21614e-08	-5.50333e-09	-4.53524e-09	-9.79844e-09	-1.63959e-08	-3.77399e-08	-5.57313e-08	-4.93161e-08	-1.05268e-07	-5.50333e-09	-1.11322e-07	-1.23083e-07	-1.22866e-07	-1.05625e-08	-1.41537e-08	-1.85116e-08	-4.30571e-08	-6.36505e-08	-5.55616e-08	-3.10621e-08	-6.21674e-08	-5.39854e-08	-6.64091e-08	-3.8595e-08	-2.81645e-08	-6.02236e-09	-2.6871e-08	-1.3881e-08
83	-1.83293e-08	-2.24317e-08	-5.5535e-09	-4.5729e-09	-9.91199e-09	-1.65818e-08	-3.82267e-08	-5.64721e-08	-4.96883e-08	-1.06444e-07	-5.5535e-09	-1.12776e-07	-1.24517e-07	-1.24312e-07	-1.06953e-08	-1.43825e-08	-1.87073e-08	-4.35399e-08	-6.43859e-08	-5.61087e-08	-3.13161e-08	-6.29622e-08	-5.466e-08	-6.72287e-08	-3.92258e-08	-2.84069e-08	-6.10799e-09	-2.71633e-08	-1.40326e-08
84	-1.84968e-08	-2.26787e-08	-5.65941e-09	-4.63037e-09	-1.00283e-08	-1.67419e-08	-3.85828e-08	-5.71911e-08	-5.01052e-08	-1.07574e-07	-5.65941e-09	-1.13974e-07	-1.25959e-07	-1.25676e-07	-1.08317e-08	-1.45607e-08	-1.89296e-08	-4.4004e-08	-6.51089e-08	-5.68055e-08	-3.16088e-08	-6.38004e-08	-5.5192e-08	-6.8079e-08	-3.97725e-08	-2.8644e-08	-6.18343e-09	-2.74543e-08	-1.42226e-08
85	-1.86704e-08	-2.2848e-08	-5.72138e-09	-4.66786e-09	-1.00892e-08	-1.69215e-08	-3.91121e-08	-5.78328e-08	-5.05246e-08	-1.08923e-07	-5.72138e-09	-1.1528e-07	-1.2733e-07	-1.27019e-07	-1.09684e-08	-1.47392e-08	-1.91183e-08	-4.44897e-08	-6.58641e-08	-5.7428e-08	-3.19056e-08	-6.45024e-08	-5.59559e-08	-6.88679e-08	-4.03456e-08	-2.88888e-08	-6.27643e-09	-2.78332e-08	-1.43601e-08
86	-1.88169e-08	-2.31211e-08	-5.7777e-09	-4.69898e-09	-1.019e-08	-1.71261e-08	-3.97016e-08	-5.85656e-08	-5.10468e-08	-1.10356e-07	-5.7777e-09	-1.16452e-07	-1.28869e-07	-1.28449e-07	-1.10701e-08	-1.48652e-08	-1.93064e-08	-4.49442e-08	-6.65551e-08	-5.80757e-08	-3.2219e-08	-6.52727e-08	-5.65649e-08	-6.97245e-08	-4.08179e-08	-2.90981e-08	-6.34981e-09	-2.81311e-08	-1.45351e-08
87	-1.89978e-08	-2.33291e-08	-5.82772e-09	-4.72662e-09	-1.03016e-08	-1.72937e-08	-4.02332e-08	-5.93307e-08	-5.1368e-08	-1.11421e-07	-5.82772e-09	-1.17682e-07	-1.303e-07	-1.29828e-07	-1.11771e-08	-1.49795e-08	-1.94939e-08	-4.54115e-08	-6.73232e-08	-5.86915e-08	-3.24508e-08	-6.61704e-08	-5.72141e-08	-7.05607e-08	-4.13044e-08	-2.93125e-08	-6.43369e-09	-2.83939e-08	-1.47119e-08
88	-1.92064e-08	-2.35827e-08	-5.88098e-09	-4.82721e-09	-1.03871e-08	-1.74795e-08	-4.06992e-08	-5.99643e-08	-5.16854e-08	-1.12701e-07	-5.88098e-09	-1.19209e-07	-1.31687e-07	-1.31174e-07	-1.12933e-08	-1.51166e-08	-1.97046e-08	-4.58565e-08	-6.80479e-08	-5.93054e-08	-3.27145e-08	-6.69164e-08	-5.78785e-08	-7.13591e-08	-4.18253e-08	-2.95118e-08	-6.52913e-09	-2.87572e-08	-1.49155e-08
89	-1.93803e-08	-2.37868e-08	-5.9406e-09	-4.85608e-09	-1.04866e-08	-1.76767e-08	-4.11446e-08	-6.05396e-08	-5.20772e-08	-1.13872e-07	-5.9406e-09	-1.20561e-07	-1.3316e-07	-1.32591e-07	-1.14397e-08	-1.52457e-08	-1.98892e-08	-4.63323e-08	-6.87606e-08	-5.99262e-08	-3.2943e-08	-6.78943e-08	-5.85017e-08	-7.21488e-08	-4.23499e-08	-2.9719e-08	-6.61276e-09	-2.90415e-08	-1.50617e-08
90	-1.95304e-08	-2.40361e-08	-5.99629e-09	-4.91573e-09	-1.05653e-08	-1.78588e-08	-4.15999e-08	-6.12553e-08	-5.24298e-08	-1.14968e-07	-5.99629e-09	-1.21829e-07	-1.347e-07	-1.3388e-07	-1.15672e-08	-1.53608e-08	-2.00956e-08	-4.6847e-08	-6.95292e-08	-6.0552e-08	-3.32526e-08	-6.86155e-08	-5.91672e-08	-7.29288e-08	-4.29234e-08	-2.99344e-08	-6.69645e-09	-2.94474e-08	-1.52127e-08
91	-1.97462e-08	-2.42699e-08	-6.04896e-09	-4.94896e-09	-1.06503e-08	-1.80134e-08	-4.20915e-08	-6.20039e-08	-5.27684e-08	-1.16121e-07	-6.04896e-09	-1.23295e-07	-1.36193e-07	-1.35268e-07	-1.16722e-08	-1.54637e-08	-2.02829e-08	-4.72914e-08	-7.02135e-08	-6.11789e-08	-3.34909e-08	-6.94091e-08	-5.99606e-08	-7.37787e-08	-4.34036e-08	-3.01383e-08	-6.78813e-09	-2.97307e-08	-1.53884e-08
92	-1.99095e-08	-2.46296e-08	-6.11051e-09	-5.0314e-09	-1.07269e-08	-1.8174e-08	-4.24859e-08	-6.28229e-08	-5.30026e-08	-1.17237e-07	-6.11051e-09	-1.24532e-07	-1.37624e-07	-1.36564e-07	-1.17684e-08	-1.55758e-08	-2.05032e-08	-4.78338e-08	-7.09169e-08	-6.18592e-08	-3.38303e-08	-7.023e-08	-6.06208e-08	-7.4634e-08	-4.38049e-08	-3.03364e-08	-6.86826e-09	-3.00055e-08	-1.55875e-08
93	-2.00909e-08	-2.48575e-08	-6.18717e-09	-5.15384e-09	-1.08101e-08	-1.83055e-08	-4.28809e-08	-6.35053e-08	-5.33886e-08	-1.18278e-07	-6.18717e-09	-1.25768e-07	-1.3909e-07	-1.37875e-07	-1.18621e-08	-1.5702e-08	-2.06755e-08	-4.83778e-08	-7.16955e-08	-6.24911e-08	-3.41279e-08	-7.09633e-08	-6.12732e-08	-7.54498e-08	-4.43574e-08	-3.05539e-08	-6.95457e-09	-3.03047e-08	-1.57788e-08
94	-2.02332e-08	-2.51155e-08	-6.25942e-09	-5.18408e-09	-1.09068e-08	-1.84784e-08	-4.33252e-08	-6.4275e-08	-5.36992e-08	-1.19379e-07	-6.25942e-09	-1.26972e-07	-1.4049e-07	-1.39125e-07	-1.19791e-08	-1.58549e-08	-2.08574e-08	-4.88878e-08	-7.24099e-08	-6.31199e-08	-3.43938e-08	-7.17662e-08	-6.18877e-08	-7.62736e-08	-4.48855e-08	-3.07587e-08	-7.04988e-09	-3.05066e-08	-1.59199e-08
95	-2.04039e-08	-2.53688e-08	-6.31991e-09	-5.34838e-09	-1.09773e-08	-1.86736e-08	-4.38633e-08	-6.4885e-08	-5.39718e-08	-1.20483e-07	-6.31991e-09	-1.28256e-07	-1.41902e-07	-1.40482e-07	-1.20612e-08	-1.59554e-08	-2.10578e-08	-4.94053e-08	-7.30773e-08	-6.37515e-08	-3.4685e-08	-7.25171e-08	-6.25829e-08	-7.70741e-08	-4.534e-08	-3.09647e-08	-7.13338e-09	-3.07769e-08	-1.61188e-08
96	-2.0649e-08	-2.55796e-08	-6.38834e-09	-5.38142e-09	-1.10615e-08	-1.88475e-08	-4.43338e-08	-6.55227e-08	-5.43358e-08	-1.21652e-07	-6.38834e-09	-1.2947e-07	-1.43386e-07	-1.41833e-07	-1.21696e-08	-1.60829e-08	-2.12654e-08	-4.99563e-08	-7.37896e-08	-6.43392e-08	-3.48645e-08	-7.34104e-08	-6.32211e-08	-7.78337e-08	-4.58227e-08	-3.11805e-08	-7.22085e-09	-3.10346e-08	-1.62888e-08
97	-2.08242e-08	-2.58252e-08	-6.45516e-09	-5.42492e-09	-1.11624e-08	-1.90142e-08	-4.47096e-08	-6.62475e-08	-5.46901e-08	-1.22691e-07	-6.45516e-09	-1.30777e-07	-1.44759e-07	-1.43069e-07	-1.22718e-08	-1.62379e-08	-2.1449e-08	-5.04174e-08	-7.45114e-08	-6.49511e-08	-3.51719e-08	-7.42558e-08	-6.38491e-08	-7.86384e-08	-4.63077e-08	-3.14182e-08	-7.3111e-09	-3.13058e-08	-1.644e-08
98	-2.0999e-08	-2.60492e-08	-6.51334e-09	-5.45826e-09	-1.12329e-08	-1.91782e-08	-4.5301e-08	-6.68724e-08	-5.51322e-08	-1.23867e-07	-6.51334e-09	-1.32002e-07	-1.46158e-07	-1.44385e-07	-1.23703e-08	-1.6369e-08	-2.16206e-08	-5.09127e-08	-7.52379e-08	-6.56127e-08	-3.54673e-08	-7.4885e-08	-6.45222e-08	-7.94812e-08	-4.68153e-08	-3.16136e-08	-7.3966e-09	-3.16083e-08	-1.66484e-08
99	-2.12059e-08	-2.62436e-08	-6.5618e-09	-5.48425e-09	-1.12977e-08	-1.93383e-08	-4.57071e-08	-6.75743e-08	-5.54217e-08	-1.24955e-07	-6.5618e-09	-1.33263e-07	-1.47542e-07	-1.45621e-07	-1.24583e-08	-1.65283e-08	-2.18192e-08	-5.14243e-08	-7.5962e-08	-6.61837e-08	-3.57622e-08	-7.56051e-08	-6.51467e-08	-8.03053e-08	-4.73688e-08	-3.18024e-08	-7.48285e-09	-3.19223e-08	-1.68537e-08
100	-2.13574e-08	-2.65002e-08	-6.62679e-09	-5.50992e-09	-1.13773e-08	-1.95213e-08	-4.60678e-08	-6.82036e-08	-5.56872e-08	-1.25931e-07	-6.62679e-09	-1.34631e-07	-1.48913e-07	-1.4687e-07	-1.25654e-08	-1.6669e-08	-2.2003e-08	-5.18536e-08	-7.6688e-08	-6.67539e-08	-3.60302e-08	-7.64348e-08	-6.58619e-08	-8.11856e-08	-4.78958e-08	-3.19783e-08	-7.56191e-09	-3.21651e-08	-1.70262e-08
Sucrose Pools
Snap25 + Syt7		Snap25 - Syt7		Snap23 + Syt7		Snap23 - Syt7
-4.29334e-10		-1.0324e-10		-1.0341e-10		-1.1983e-10
-2.83588e-10		-6.782e-11		-2.7304e-10		-9.425e-11
-9.41825e-11		-1.4764e-10		-1.3012e-10		-2.8286e-10
-3.83278e-10		-1.1257e-10		-6.9672e-10		-5.8019e-10
-1.70899e-09		-1.6447e-09		-4.796e-10		-1.3505e-10
-2.45926e-10		-7.016e-10		-4.3346e-10		-4.9481e-10
-1.81585e-10		-3.2216e-10		-4.9126e-10		-2.8696e-10
-2.65867e-10		-8.4084e-11		-7.9355e-10		-2.4304e-10
-3.08999e-10		-1.5122e-09		-6.7112e-10		-3.3999e-10
-1.38113e-10		-9.4729e-10		-4.0263e-11		-3.0127e-10
-1.8391e-09		-6.1795e-10		-4.8418e-11		-3.3616e-10
-1.40558e-10		-1.0721e-10		-6.3568e-11		-1.8848e-10
-1.66628e-10		-2.3897e-10		-6.9082e-10		-6.5098e-10
-9.1531e-10		-6.6923e-10		-3.7535e-11		-3.4538e-10
-5.56303e-10		-1.823e-10		-2.8768e-10		-7.8934e-11
-3.37915e-10		-1.45707e-10		-1.8982e-10		-9.7276e-11
-1.3953e-10				-4.9434e-10		-4.98353e-10
-3.09885e-10						-5.02833e-11
-7.57543e-11
-4.1952e-10
-6.7821e-10
-3.6842e-10
-4.8625e-10
-3.4574e-10

## Sheet: Figure 4
STP Snap25 + Syt7 50 Hz
1st	2nd	3rd	4th	5th	STP Release	Post Release	Time of PostRel	Cumul. Charge
-4.6456e-11	-3.7306e-11	-3.3302e-11	-2.7834e-11	-2.6207e-11	-1.721e-10	-4.5386e-11	0.0072	-2.1749e-10
-4.7273e-11	-3.5808e-11	-3.3254e-11	-2.7859e-11	-2.6448e-11	-1.7163e-10	-4.3066e-11	0.0072	-2.147e-10
-6.59e-11	-6.0697e-11	-4.4191e-11	-3.3557e-11	-2.6846e-11	-2.3181e-10	-4.013e-11	0.0045	-2.7194e-10
-6.5039e-11	-5.6882e-11	-4.2897e-11	-3.2176e-11	-2.4959e-11	-2.2255e-10	-4.4904e-11	0.0045	-2.6745e-10
-3.3548e-11	-3.1421e-11	-2.4241e-11	-2.0533e-11	-1.8503e-11	-1.2845e-10	-1.4487e-11	0.0039	-1.4294e-10
-1.078e-11	-7.435e-12	-9.5075e-12	-4.6836e-12	-6.7841e-12	-3.9271e-11	-4.6162e-12	0.0051	-4.3887e-11
-1.0659e-11	-5.6215e-12	-8.3094e-12	-5.0558e-12	-6.7262e-12	-3.6443e-11	-4.4969e-12	0.0051	-4.094e-11
-1.1324e-11	-6.5516e-12	-1.0183e-11	-5.5995e-12	-7.3256e-12	-4.1069e-11	-8.0109e-12	0.0093	-4.908e-11
-2.9321e-11	-3.9083e-11	-3.7885e-11	-3.7112e-11	-3.4024e-11	-1.7784e-10	-5.7039e-11	0.005	-2.3488e-10
-3.3161e-11	-2.6336e-11	-2.0058e-11	-1.9631e-11	-1.7831e-11	-1.1722e-10	-2.2556e-11	0.0055	-1.3978e-10
-4.9753e-11	-4.8131e-11	-4.2793e-11	-3.9824e-11	-3.6253e-11	-2.1755e-10	-2.5057e-11	0.005	-2.4261e-10
-6.2336e-11	-5.1066e-11	-3.2761e-11	-2.3612e-11	-1.9738e-11	-1.9011e-10	-4.1598e-11	0.0043	-2.3171e-10
-3.1992e-11	-3.255e-11	-2.559e-11	-2.206e-11	-2.0379e-11	-1.3311e-10	-1.8673e-11	0.006	-1.5178e-10
-3.9748e-11	-2.9427e-11	-1.5971e-11	-1.1046e-11	-7.5824e-12	-1.0418e-10	-3.4321e-11	0.006	-1.385e-10
-6.3384e-11	-5.8099e-11	-5.1008e-11	-4.5335e-11	-4.0972e-11	-2.5914e-10	-5.8535e-11	0.0038	-3.1767e-10
-5.1697e-11	-4.5372e-11	-3.5155e-11	-2.9422e-11	-2.5748e-11	-1.8765e-10	-3.3417e-11	0.0053	-2.2107e-10
-5.2138e-11	-3.7795e-11	-2.9046e-11	-2.3941e-11	-2.0274e-11	-1.6337e-10	-7.3341e-12	0.0036	-1.707e-10
-5.3136e-11	-6.532e-11	-5.7469e-11	-4.6137e-11	-4.1163e-11	-2.6401e-10	-3.6953e-11	0.0046	-3.0096e-10
-3.272e-11	-1.8001e-11	-1.241e-11	-8.8684e-12	-8.1456e-12	-8.0193e-11	-3.784e-12	0.0041	-8.3977e-11
-5.2151e-11	-4.5255e-11	-3.4919e-11	-2.6867e-11	-2.2817e-11	-1.8245e-10	-1.9724e-11	0.0042	-2.0217e-10
-3.2966e-11	-2.3778e-11	-1.6875e-11	-1.0729e-11	-9.8074e-12	-9.434e-11	-2.3189e-11	0.0053	-1.1753e-10
-2.6766e-11	-2.8763e-11	-2.3942e-11	-1.9084e-11	-1.5433e-11	-1.1418e-10	-1.1044e-11	0.0055	-1.2522e-10
-4.0136e-11	-2.9671e-11	-2.971e-11	-2.1379e-11	-2.1976e-11	-1.4304e-10	-1.2745e-11	0.0069	-1.5578e-10
-9.2825e-12	-4.8759e-12	-2.4087e-12	-2.3033e-12	-2.0444e-12	-2.0915e-11	-1.004e-11	0.0048	-3.0955e-11
-2.5909e-11	-1.7127e-11	-1.1744e-11	-9.8122e-12	-8.2157e-12	-7.2888e-11	-1.9693e-11	0.0113	-9.2581e-11
-3.351e-11	-2.33e-11	-1.5373e-11	-1.2574e-11	-9.0096e-12	-9.3879e-11	-1.2419e-11	0.0042	-1.063e-10
-9.4786e-12	-5.1591e-12	-4.398e-12	-3.8676e-12	-3.4963e-12	-2.6418e-11	-1.3465e-13	0.0087	-2.6553e-11
-2.8013e-11	-2.6303e-11	-2.1943e-11	-1.8277e-11	-1.5907e-11	-1.1063e-10	-1.7107e-11	0.0059	-1.2774e-10
-3.2292e-11	-2.7759e-11	-2.2954e-11	-1.6964e-11	-1.4557e-11	-1.1479e-10	-6.4689e-12	0.0038	-1.2126e-10
-9.9231e-11	-8.0144e-11	-5.5029e-11	-4.4261e-11	-3.9431e-11	-3.1873e-10	-4.6846e-11	0.0036	-3.6558e-10
-2.0511e-11	-2.027e-11	-1.5979e-11	-1.4646e-11	-1.3486e-11	-8.5018e-11	-2.3944e-12	0.0036	-8.7412e-11
-1.5648e-11	-1.6587e-11	-1.5384e-11	-1.4624e-11	-1.349e-11	-7.5776e-11	-2.9346e-12	0.01325	-7.8711e-11
Snap25 - Syt7 50 Hz
-2.6055e-12	-2.0821e-12	-1.8511e-12	-1.7266e-12	-5.6212e-13	-8.831e-12	-1.2394e-12	0.0103	-1.007e-11
-7.297e-12	-3.9353e-12	-3.0417e-12	-3.1228e-12	-2.8957e-12	-2.0302e-11	-3.5528e-12	0.00395	-2.3855e-11
-1.0238e-11	-8.09e-12	-7.2009e-12	-6.5581e-12	-5.153e-12	-3.7287e-11	-5.294e-12	0.00445	-4.2581e-11
-4.998e-12	-4.4026e-12	-4.0729e-12	-3.7418e-12	-3.8179e-12	-2.1042e-11	-4.1087e-12	0.01055	-2.5151e-11
-1.3963e-11	-9.5495e-12	-7.015e-12	-5.7428e-12	-4.7464e-12	-4.1068e-11	-5.9663e-12	0.00395	-4.7034e-11
-5.8651e-11	-4.63e-11	-3.6372e-11	-3.0461e-11	-2.4466e-11	-1.9676e-10	-5.0909e-12	0.0067	-2.0185e-10
-1.0816e-10	-8.746e-11	-6.6653e-11	-5.626e-11	-5.0873e-11	-3.7031e-10	-5.3898e-11	0.004	-4.2421e-10
-4.5055e-11	-3.4029e-11	-2.4199e-11	-1.9284e-11	-1.7027e-11	-1.4003e-10	-1.7524e-11	0.0048	-1.5755e-10
-8.0238e-12	-7.7089e-12	-7.6941e-12	-7.6349e-12	-5.1964e-12	-3.6275e-11	-7.6214e-14	0.0041	-3.6351e-11
-3.0536e-11	-1.8044e-11	-1.5934e-11	-1.0478e-11	-8.7625e-12	-8.3845e-11	-1.2494e-12	0.0098	-8.5094e-11
-2.6579e-11	-2.0434e-11	-1.4242e-11	-1.2067e-11	-1.163e-11	-8.5072e-11	-9.4838e-12	0.0076	-9.4556e-11
-2.5743e-11	-2.6321e-11	-2.5241e-11	-2.4403e-11	-2.3539e-11	-1.2582e-10	-1.9765e-10	0.0044	-3.2347e-10
-2.4375e-11	-1.7866e-11	-1.4271e-11	-1.2049e-11	-1.0818e-11	-7.946e-11	-3.841e-12	0.0043	-8.3301e-11
-2.5331e-11	-2.0983e-11	-1.5597e-11	-1.3336e-11	-1.2042e-11	-8.7611e-11	-9.1397e-12	0.0057	-9.6751e-11
-2.3258e-11	-1.9116e-11	-1.5304e-11	-1.1998e-11	-1.0995e-11	-8.087e-11	-1.2951e-11	0.0054	-9.3821e-11
-3.9103e-11	-2.23e-11	-1.6217e-11	-1.1318e-11	-9.8694e-12	-9.9065e-11	-4.356e-11	0.0062	-1.4263e-10
-5.1751e-11	-5.6663e-11	-5.973e-11	-5.7296e-11	-5.4939e-11	-2.8175e-10	-1.0724e-10	0.0055	-3.8899e-10
-9.2844e-11	-8.7995e-11	-8.0915e-11	-7.5771e-11	-6.4147e-11	-4.0364e-10	-7.7433e-11	0.0072	-4.8107e-10
-2.2499e-11	-1.2484e-11	-7.3469e-12	-6.2769e-12	-6.1994e-12	-5.4845e-11	-8.7991e-13	0.0048	-5.5725e-11
-3.0653e-11	-1.8104e-11	-1.6017e-11	-1.0557e-11	-8.8032e-12	-8.4221e-11	-1.2494e-12	0.0094	-8.547e-11
-2.6703e-11	-2.0534e-11	-1.4329e-11	-1.217e-11	-1.1719e-11	-8.5571e-11	-9.4838e-12	0.0072	-9.5055e-11
-1.5046e-11	-1.4841e-11	-1.2396e-11	-1.1603e-11	-7.647e-12	-6.1813e-11	-4.817e-11	0.0064	-1.0998e-10
-5.8619e-11	-4.5764e-11	-3.5308e-11	-2.9109e-11	-2.2954e-11	-1.9207e-10	-8.4944e-13	0.0049	-1.9292e-10
-1.0913e-10	-8.8325e-11	-6.7318e-11	-5.6915e-11	-5.1472e-11	-3.7403e-10	-5.3898e-11	0.0036	-4.2793e-10
-4.5586e-11	-3.4434e-11	-2.45e-11	-1.9573e-11	-1.731e-11	-1.4182e-10	-1.7524e-11	0.0044	-1.5934e-10
-3.4458e-11	-2.3526e-11	-1.604e-11	-1.1245e-11	-8.7306e-12	-9.432e-11	-1.1508e-11	0.0055	-1.0583e-10
-2.5389e-11	-1.8664e-11	-1.5599e-11	-1.34e-11	-1.1519e-11	-8.4678e-11	-1.0371e-11	0.0041	-9.5049e-11
-2.3454e-11	-2.2125e-11	-1.8051e-11	-1.5459e-11	-1.1192e-11	-9.0369e-11	-3.6293e-12	0.006	-9.3998e-11
-3.5493e-11	-2.2712e-11	-1.5625e-11	-1.1567e-11	-1.0118e-11	-9.5559e-11	-4.2579e-12	0.0052	-9.9817e-11
-3.6443e-11	-3.1633e-11	-2.6746e-11	-2.2661e-11	-1.9211e-11	-1.368e-10	-2.1108e-11	0.00415	-1.5791e-10
-1.2948e-10	-9.176e-11	-7.0595e-11	-5.6397e-11	-4.9663e-11	-3.983e-10	-5.5237e-11	0.00365	-4.5354e-10
-9.2467e-11	-6.1999e-11	-4.4585e-11	-3.6189e-11	-3.1065e-11	-2.6642e-10	-3.0721e-11	0.0066	-2.9714e-10
-2.3235e-11	-1.285e-11	-1.0169e-11	-7.3506e-12	-7.618e-12	-6.125e-11	-9.1901e-13	0.00375	-6.2169e-11
-2.2149e-11	-2.3588e-11	-2.3674e-11	-2.1754e-11	-1.9836e-11	-1.1111e-10	-8.2127e-12	0.0038	-1.1932e-10
Snap23 + Syt7 50 Hz
-1.0467e-12	-2.8059e-12	-4.5024e-12	-3.7574e-12	-4.1963e-12	-1.6348e-11	-6.7135e-11	0.00705	-8.3483e-11
-5.0845e-13	-9.5349e-13	-1.0442e-12	-1.5213e-12	-1.5118e-12	-5.5511e-12	-4.7768e-11	0.01085	-5.3319e-11
-1.0427e-12	-1.0625e-12	-1.082e-12	-1.3918e-12	-2.245e-12	-6.8401e-12	-4.3927e-11	0.0115	-5.0767e-11
-4.403e-13	-4.2015e-13	-7.8652e-13	-1.2147e-12	-4.6315e-13	-3.3307e-12	-1.4264e-11	0.01045	-1.7595e-11
-3.3898e-13	-7.9259e-13	-2.2598e-12	-3.0349e-12	-3.1377e-12	-9.5872e-12	-6.3579e-11	0.0108	-7.3166e-11
-8.2719e-13	-1.4399e-12	-1.4309e-12	-1.2503e-12	-2.6725e-12	-7.6418e-12	-2.9954e-11	0.0092	-3.7596e-11
-2.182e-14	-8.1948e-13	-1.3988e-12	-2.0867e-12	-2.2291e-12	-6.578e-12	-1.2905e-11	0.01025	-1.9483e-11
-9.9766e-13	-1.9206e-12	-2.2089e-12	-1.8327e-12	-1.8157e-12	-8.8022e-12	-2.1201e-11	0.01025	-3.0003e-11
-7.3477e-13	-1.2409e-12	-9.3513e-13	-1.156e-12	-1.0409e-12	-5.1208e-12	-3.9376e-11	0.0103	-4.4497e-11
-1.0293e-12	-2.6249e-12	-2.6683e-12	-2.628e-12	-2.8534e-12	-1.1837e-11	-3.8791e-11	0.00775	-5.0628e-11
-7.3263e-13	-2.8499e-12	-2.1339e-12	-2.7392e-12	-2.25e-12	-1.0739e-11	-5.1742e-11	0.0097	-6.2481e-11
--	-6.8391e-13	-7.9152e-13	-1.28e-12	-9.6744e-13	-3.7052e-12	-5.6014e-11	0.01145	-5.9719e-11
-6.50508e-13	-1.63645e-12	-4.7588e-13	-1.8194e-12	-2.3392e-12	-4.1685e-12	-5.9385e-12	0.0077	-1.0107e-11
--	-3.1202e-13	-8.5877e-13	-2.2023e-12	-2.7221e-12	-6.0908e-12	-1.5721e-11	0.0077	-2.1812e-11
-9.7419e-13	-2.574e-12	-2.5347e-12	-2.886e-12	-3.1407e-12	-1.2141e-11	-5.674e-11	0.0084	-6.8881e-11
-4.2131e-13	-1.8419e-12	-2.1041e-12	-2.0792e-12	-2.6403e-12	-9.1083e-12	-4.1712e-11	0.0079	-5.082e-11
-1.0479e-12	-5.3263e-12	-8.3738e-12	-7.6624e-12	-8.2329e-12	-3.0743e-11	-5.3092e-11	0.0115	-8.3835e-11
-2.3098e-13	-1.3562e-12	-2.0753e-12	-2.1209e-12	-1.9029e-12	-7.7069e-12	-1.6903e-11	0.00775	-2.461e-11
-8.0035e-13	-1.0855e-12	-1.587e-12	-1.6516e-12	-2.6447e-12	-7.7881e-12	-3.4128e-11	0.01165	-4.1916e-11
-6.4025e-13	-1.6238e-12	-2.354e-12	-2.3263e-12	-2.0389e-12	-9.0055e-12	-1.1481e-11	0.0087	-2.0487e-11
-5.0596e-13	-1.142e-12	-2.1723e-12	-2.6127e-12	-3.3872e-12	-9.8499e-12	-2.3207e-11	0.0095	-3.3057e-11
-7.0216e-13	-2.5337e-12	-3.3422e-12	-3.8483e-12	-3.5206e-12	-1.3993e-11	-6.0436e-11	0.00895	-7.4429e-11
-7.1512e-13	-9.7174e-13	-2.0545e-12	-2.4109e-12	-2.6057e-12	-8.786e-12	-5.0096e-11	0.01135	-5.8882e-11
-2.4669e-13	-1.8707e-12	-2.856e-12	-3.0528e-12	-2.9766e-12	-1.104e-11	-2.8969e-11	0.0081	-4.0009e-11
-3.0577e-13	-1.0228e-12	-1.1879e-12	-1.8814e-12	-1.6774e-12	-6.0921e-12	-2.847e-11	0.0121	-3.4562e-11
Snap23 - Syt7 50 Hz
-2.7789e-13	-3.4119e-13	-3.5468e-13	-4.2562e-13	-6.9664e-13	-2.1045e-12	-6.4e-11	0.012	-6.6104e-11
-4.8744e-13	-4.892e-13	-5.7684e-13	-5.6617e-13	-7.5792e-13	-2.8793e-12	-4.2034e-11	0.01065	-4.4913e-11
-5.8047e-14	-2.6687e-13	-9.377e-13	-1.8409e-12	-2.1851e-12	-5.2998e-12	-1.444e-10	0.01165	-1.497e-10
-7.2207e-13	-7.1364e-13	-6.9583e-13	-8.0846e-13	-8.0744e-13	-3.756e-12	-2.6614e-11	0.00795	-3.037e-11
-3.8988e-13	-3.7285e-13	-4.4764e-13	-4.1986e-13	-4.5834e-13	-2.0942e-12	-3.6509e-11	0.01235	-3.8603e-11
-2.9314e-13	-3.2907e-13	-3.3616e-13	-4.1393e-13	-4.0465e-13	-1.7833e-12	-1.5295e-11	0.00835	-1.7078e-11
-8.7905e-13	-1.4408e-12	-1.2385e-12	-1.2185e-12	-1.5361e-12	-6.3331e-12	-4.4897e-11	0.0071	-5.123e-11
-1.0289e-12	-6.3766e-13	-7.34e-13	-1.017e-12	-5.6528e-13	-3.9961e-12	-7.6483e-11	0.0108	-8.0479e-11
-1.0172e-13	-3.6505e-13	-3.7664e-13	-9.233e-13	-9.1486e-13	-2.691e-12	-4.5073e-11	0.0073	-4.7764e-11
-3.8136e-13	-4.8658e-13	-4.562e-13	-8.6647e-13	-6.8908e-13	-2.8938e-12	-3.017e-11	0.0071	-3.3064e-11
-1.4902e-13	-2.3985e-14	-9.5634e-14	-1.587e-13	-2.1184e-13	-6.3932e-13	-5.7327e-12	0.008	-6.372e-12
2.9514e-13	0	-1.191e-14	-3.5213e-13	-6.6813e-13	-5.3418e-13	-3.0406e-11	0.0116	-3.094e-11
-5.0733e-13	-4.4992e-13	-1.5617e-12	-2.8055e-12	-1.5687e-12	-6.9165e-12	-1.4479e-10	0.0095	-1.5171e-10
-2.4463e-13	-3.2823e-13	-7.3361e-13	-1.5863e-12	-4.4227e-12	-7.3512e-12	-1.1384e-10	0.0103	-1.2119e-10
-5.5397e-13	-5.0289e-13	-3.5016e-13	-7.3414e-13	-1.4449e-12	-3.6089e-12	-4.2067e-11	0.0081	-4.5676e-11
-1.0437e-12	-1.8649e-12	-1.7693e-12	-3.4182e-12	-3.8462e-12	-1.2004e-11	-2.0177e-10	0.009	-2.1377e-10
-9.4275e-13	-1.6419e-12	-1.9473e-12	-3.1319e-12	-3.8112e-12	-1.1527e-11	-1.8645e-10	0.0096	-1.9798e-10
-8.5532e-13	-1.4329e-12	-1.3551e-12	-2.5063e-12	-2.8421e-12	-9.0414e-12	-1.6179e-10	0.0097	-1.7083e-10
8.7539e-14	-5.3755e-13	-6.4273e-13	-1.1332e-12	-1.7077e-12	-3.9582e-12	-9.1614e-11	0.0092	-9.5572e-11
-4.3961e-13	-6.9989e-13	-4.3509e-13	-7.7817e-13	-1.1674e-12	-3.527e-12	-4.5325e-11	0.0095	-4.8852e-11
-8.2625e-13	-8.9261e-13	-1.1747e-12	-1.1232e-12	-1.4321e-12	-5.4785e-12	-8.8003e-11	0.0082	-9.3482e-11
-7.9719e-14	-3.4464e-13	-3.5205e-13	-7.4148e-13	-8.0664e-13	-2.334e-12	-4.4969e-11	0.0082	-4.7303e-11
-3.3352e-13	-4.3339e-13	-3.9548e-13	-8.1334e-13	-6.3795e-13	-2.6278e-12	-3.0103e-11	0.0093	-3.2731e-11
-2.1484e-14	1.3578e-14	6.3641e-14	-4.5534e-13	-3.8814e-13	-7.9291e-13	-4.8731e-11	0.0093	-4.9524e-11
2.1793e-13	2.1659e-13	-1.7148e-13	5.9125e-14	-1.7621e-13	-1.2813e-15	-2.7552e-11	0.0119	-2.7553e-11
3.8241e-13	-2.7033e-13	-7.4484e-13	-2.4368e-12	-4.2537e-12	-7.3579e-12	-1.482e-10	0.0117	-1.5556e-10
-6.4236e-13	-1.0508e-12	-9.8525e-13	-8.8564e-13	-1.1964e-12	-4.7804e-12	-4.4752e-11	0.0081	-4.9532e-11
-7.9959e-13	-4.4241e-13	-5.7131e-13	-8.3459e-13	-4.4766e-13	-3.1089e-12	-7.6442e-11	0.0108	-7.9551e-11
-2.8288e-13	-5.1839e-13	-8.0245e-13	-8.7298e-13	-1.1328e-12	-3.6194e-12	-4.5256e-11	0.01055	-4.8875e-11
2.5875e-14	-3.7141e-14	-2.7188e-14	-4.2438e-14	-1.5624e-13	-2.3984e-13	-1.5745e-11	0.009	-1.5985e-11
8.6016e-15	-5.3773e-13	-6.9142e-13	-1.1857e-12	-1.9777e-12	-4.3931e-12	-6.8298e-11	0.0098	-7.2691e-11
-1.1284e-13	-2.0885e-13	-1.6083e-13	-8.3168e-13	-1.2063e-12	-2.5281e-12	-1.0313e-10	0.01045	-1.0566e-10
-3.7279e-13	-4.1886e-13	-3.9586e-13	-5.2932e-13	-8.1954e-13	-2.5396e-12	-4.6522e-11	0.00825	-4.9062e-11
-6.7194e-14	-1.1693e-13	-9.3631e-14	-1.0481e-13	-2.5336e-13	-6.602e-13	-7.7068e-12	0.0109	-8.367e-12
-2.4147e-13	-2.4687e-13	-4.5451e-13	-3.7451e-13	-4.4778e-13	-1.7718e-12	-3.751e-11	0.00955	-3.9282e-11
STP Snap25 + Syt7 5 Hz
-2.0972e-11	-2.0643e-11	-2.2457e-11	-2.1006e-11	-2.1893e-11	-1.0731e-10	-1.8841e-12	0.1421	-1.0919e-10
-6.2755e-11	-5.5997e-11	-4.8586e-11	-4.7858e-11	-4.3296e-11	-2.5867e-10	-2.1564e-14	0.0232	-2.5869e-10
-9.6486e-11	-6.6445e-11	-7.2078e-11	-5.3088e-11	-6.1846e-11	-3.4996e-10	-5.3734e-12	73	-3.5533e-10
-1.803e-10	-1.4898e-10	-1.3261e-10	-1.3001e-10	-1.2709e-10	-7.1903e-10	-1.8483e-11	0.0313	-7.3751e-10
-3.8454e-11	-5.8324e-11	-6.5501e-11	-6.9791e-11	-7.2492e-11	-3.0459e-10	-2.1767e-11	0.0113	-3.2636e-10
-5.0817e-11	-4.6193e-11	-4.3786e-11	-4.3517e-11	-4.395e-11	-2.2827e-10	-2.5619e-12	0.0576	-2.3083e-10
-1.417e-10	-9.6229e-11	-8.1646e-11	-7.8592e-11	-8.0158e-11	-4.7834e-10	-1.1262e-11	0.0085	-4.896e-10
-3.4527e-11	-7.0411e-12	-8.5799e-12	-9.7769e-12	-8.7162e-12	-6.8646e-11	-5.7144e-12	0.1325	-7.436e-11
-7.911e-11	-8.9727e-11	-8.9618e-11	-8.9087e-11	-9.331e-11	-4.4086e-10	-3.0464e-12	0.0373	-4.4391e-10
-3.4491e-11	-3.8692e-11	-2.9576e-11	-3.1089e-11	-3.0882e-11	-1.6473e-10	-3.3397e-12	0.1403	-1.6807e-10
-3.249e-11	-3.6867e-11	-3.3716e-11	-3.2755e-11	-3.431e-11	-1.7015e-10	-5.1889e-12	0.1633	-1.7534e-10
-7.4452e-11	-7.3706e-11	-7.1837e-11	-7.8476e-11	-7.8545e-11	-3.7702e-10	-6.7384e-12	0.0689	-3.8376e-10
-5.3882e-11	-4.9956e-11	-5.1032e-11	-5.6382e-11	-5.5456e-11	-2.6671e-10	-6.649e-12	0.1398	-2.7336e-10
-6.3974e-11	-4.3041e-11	-3.7283e-11	-3.9083e-11	-3.8357e-11	-2.2174e-10	-2.8753e-12	0.0255	-2.2462e-10
-1.0763e-10	-9.8152e-11	-8.7188e-11	-8.8333e-11	-9.2123e-11	-4.7343e-10	-2.8138e-12	0.0727	-4.7624e-10
-2.1685e-11	-1.9877e-11	-2.1287e-11	-2.199e-11	-2.2246e-11	-1.0709e-10	-1.0322e-12	0.06	-1.0812e-10
-7.7772e-11	-7.7363e-11	-7.4023e-11	-7.282e-11	-7.491e-11	-3.7689e-10	-5.1615e-12	0.0448	-3.8205e-10
-9.1792e-12	-7.9298e-12	-1.1883e-11	-1.5152e-11	-1.5932e-11	-6.0078e-11	-7.9117e-13	0.0443	-6.0869e-11
-3.3421e-11	-2.3971e-11	-1.9731e-11	-1.9174e-11	-2.1189e-11	-1.1749e-10	-6.003e-12	0.04	-1.2349e-10
-5.9079e-11	-5.1273e-11	-4.9124e-11	-4.7048e-11	-4.784e-11	-2.5437e-10	-4.553e-12	0.1168	-2.5892e-10
-2.9814e-11	-1.7902e-11	-1.8218e-11	-1.3438e-11	-8.8777e-12	-9.7933e-11	0	0.0137	-9.7933e-11
-2.7359e-11	-2.9055e-11	-2.5752e-11	-2.6684e-11	-2.4714e-11	-1.3471e-10	0	0.0316	-1.3471e-10
-4.4147e-11	-4.2894e-11	-3.6392e-11	-3.3044e-11	-3.5061e-11	-1.9154e-10	-5.4099e-13	0.0926	-1.9208e-10
-3.2696e-11	-2.3987e-11	-1.994e-11	-1.3089e-11	-1.7446e-11	-1.0716e-10	-6.4439e-13	0.0078	-1.078e-10
-1.0843e-11	-8.9982e-12	-7.0368e-12	-5.7282e-12	-5.5803e-12	-3.8387e-11	-5.8498e-13	0.0684	-3.8972e-11
-1.6289e-11	-1.482e-11	-1.3734e-11	-1.4244e-11	-1.5583e-11	-7.5535e-11	-1.1822e-14	0.0062	-7.5547e-11
-3.271e-11	-2.2136e-11	-1.8442e-11	-1.7929e-11	-2.0057e-11	-1.1128e-10	-1.9181e-12	0.1453	-1.132e-10
-5.7077e-11	-5.123e-11	-4.6371e-11	-4.3903e-11	-4.8366e-11	-2.4694e-10	-9.5042e-13	0.0406	-2.4789e-10
-5.9682e-11	-4.4873e-11	-3.7914e-11	-3.8818e-11	-4.3552e-11	-2.2483e-10	-6.5546e-14	0.15545	-2.249e-10
-2.5649e-11	-2.3751e-11	-2.159e-11	-2.1461e-11	-2.2525e-11	-1.1498e-10	-5.0581e-12	0.01205	-1.2004e-10
-1.0415e-11	-8.6666e-12	-6.6366e-12	-5.9099e-12	-6.6493e-12	-3.9794e-11	-1.8118e-17	0.1785	-3.9794e-11
-3.3971e-11	-2.5003e-11	-2.1818e-11	-1.8065e-11	-1.7864e-11	-1.1672e-10	-2.6248e-12	0.10865	-1.1934e-10
-1.2067e-11	-7.6794e-12	-6.6247e-12	-5.5073e-12	-6.2403e-12	-3.812e-11	-6.229e-13	0.1082	-3.8743e-11
-1.2506e-11	-8.3118e-12	-7.8145e-12	-8.2806e-12	-9.2096e-12	-4.6126e-11	-7.8574e-12	0.11715	-5.3983e-11
-1.2745e-10	-1.1091e-10	-9.9547e-11	-1.0694e-10	-1.1131e-10	-5.5616e-10	-1.9683e-11	0.16525	-5.7584e-10
STP Snap25 - Syt7 5 Hz
-1.4525e-10	-1.138e-10	-9.9397e-11	-9.6331e-11	-9.7766e-11	-5.5261e-10	-4.6998e-11	0.1459	-5.9961e-10
-3.1677e-11	-3.1459e-11	-2.8898e-11	-2.9876e-11	-2.9766e-11	-1.5171e-10	-1.2753e-11	0.0579	-1.6446e-10
-4.0283e-11	-3.3461e-11	-2.7427e-11	-2.7328e-11	-2.7443e-11	-1.5596e-10	-6.6798e-12	0.0926	-1.6264e-10
-1.5059e-11	-1.0255e-11	-9.0957e-12	-7.364e-12	-7.7558e-12	-4.9538e-11	-3.6793e-12	0.159	-5.3217e-11
-3.3027e-11	-2.4033e-11	-2.2683e-11	-2.0385e-11	-2.1219e-11	-1.2136e-10	-2.8525e-15	0.1051	-1.2136e-10
-2.2455e-11	-1.748e-11	-1.63e-11	-1.578e-11	-1.8342e-11	-9.0364e-11	-1.0192e-12	0.1864	-9.1383e-11
-4.4727e-11	-2.4272e-11	-2.2047e-11	-2.0136e-11	-2.1922e-11	-1.331e-10	-1.5473e-12	0.0472	-1.3465e-10
-1.4315e-10	-1.3602e-10	-1.3395e-10	-1.3925e-10	-1.4905e-10	-7.0144e-10	-4.3583e-11	0.0847	-7.4502e-10
-2.425e-11	-1.4852e-11	-1.2878e-11	-1.2814e-11	-1.2405e-11	-7.7226e-11	-1.1222e-12	0.1553	-7.8348e-11
-1.4525e-10	-1.138e-10	-9.9397e-11	-9.6331e-11	-9.7766e-11	-5.5261e-10	-4.6998e-11	0.1459	-5.9961e-10
-4.4147e-11	-2.8384e-11	-2.6365e-11	-2.601e-11	-2.6247e-11	-1.5116e-10	-2.3698e-12	0.02445	-1.5353e-10
-1.3119e-11	-8.5983e-12	-1.0279e-11	-7.8387e-12	-8.3875e-12	-4.8235e-11	-6.176e-13	0.0202	-4.8853e-11
-7.6426e-11	-5.7984e-11	-5.3395e-11	-5.1738e-11	-4.5941e-11	-2.8572e-10	-2.2754e-12	0.07415	-2.88e-10
-2.2253e-11	-2.1026e-11	-1.9084e-11	-1.585e-11	-1.5247e-11	-9.934e-11	0	0.1848	-9.934e-11
-7.99347e-11	-1.02463e-10	-9.13038e-11	-9.07115e-11	-9.04654e-11	-3.09569e-10	-2.35254e-11	0.09135	-3.33095e-10
-8.66071e-12	-6.45739e-12	-5.59913e-12	-5.5713e-12	-5.39348e-12	-2.65765e-11	-4.87913e-13	0.1388	-3.40643e-11
-1.04919e-11	-1.059e-11	-1.04212e-11	-9.8575e-12	-9.84e-12	-4.41214e-11	0	0.1659	-5.12144e-11
-1.42787e-11	-7.9871e-12	-6.42452e-12	-6.64226e-12	-6.49419e-12	-3.6829e-11	-1.19626e-12	0.1421	-4.30258e-11
STP Snap23 + Syt7 5 Hz
-8.4632e-12	-1.8591e-11	-2.2261e-11	-2.5147e-11	-2.4723e-11	-9.9197e-11	-2.2596e-11	0.01635	-1.2179e-10
-3.3662e-12	-7.6265e-12	-1.1216e-11	-1.5087e-11	-1.5614e-11	-5.2923e-11	-1.3008e-11	0.04895	-6.5931e-11
-2.2565e-12	-2.3511e-12	-2.8928e-12	-2.6932e-12	-2.0138e-12	-1.221e-11	-1.0877e-11	0.1721	-2.3087e-11
-4.1627e-11	-5.3922e-11	-4.966e-11	-5.6267e-11	-4.9626e-11	-2.5112e-10	-3.5759e-11	0.05155	-2.8688e-10
-5.5427e-13	-5.1086e-12	-4.3157e-12	-5.9724e-12	-5.5681e-12	-2.1599e-11	-2.8252e-13	0.0102	-2.1882e-11
-2.1346e-11	-2.3621e-11	-2.4017e-11	-2.4527e-11	-2.5879e-11	-1.1942e-10	-9.0721e-11	0.10365	-2.1014e-10
-1.6737e-11	-1.6993e-11	-1.8805e-11	-2.0015e-11	-1.8632e-11	-9.1204e-11	-6.4304e-11	0.1656	-1.5551e-10
-4.7425e-12	-7.948e-12	-1.0257e-11	-1.0043e-11	-1.2718e-11	-4.5714e-11	-1.1735e-11	0.06625	-5.7449e-11
-2.9991e-12	-7.1998e-12	-8.8741e-12	-1.0161e-11	-1.1503e-11	-4.0741e-11	-7.6219e-12	0.09525	-4.8363e-11
-1.7884e-11	-1.8893e-11	-2.0505e-11	-1.9685e-11	-2.228e-11	-9.9262e-11	-2.737e-11	0.1021	-1.2663e-10
-2.2065e-12	-5.4625e-12	-5.1832e-12	-8.2746e-12	-9.7382e-12	-3.0872e-11	-1.7585e-11	0.02995	-4.8457e-11
-1.5664e-12	-1.7028e-12	-3.1429e-12	-2.1129e-12	-3.8683e-12	-1.2397e-11	-3.9089e-12	0.0354	-1.6306e-11
-1.8383e-13	-2.5315e-13	-3.0923e-12	-5.3069e-12	-4.3642e-12	-1.3585e-11	-3.5933e-13	0.17105	-1.3944e-11
-4.6406e-12	-4.4812e-12	-7.1185e-12	-9.1235e-12	-7.9539e-12	-3.3319e-11	-5.7108e-12	0.1715	-3.903e-11
-1.5262e-12	-3.2187e-12	-5.356e-12	-4.6129e-12	-6.782e-12	-2.1498e-11	-4.8924e-12	0.10065	-2.639e-11
-1.7496e-12	-3.6695e-12	-6.8127e-12	-7.9211e-12	-1.0029e-11	-3.0187e-11	-1.3043e-11	0.03495	-4.323e-11
-2.615e-12	-4.6618e-12	-7.2617e-12	-1.0657e-11	-1.0716e-11	-3.5917e-11	-1.0609e-11	0.07665	-4.6526e-11
-2.0639e-12	-4.5113e-12	-7.2667e-12	-8.896e-12	-1.4589e-11	-3.7334e-11	-1.7152e-11	0.0151	-5.4486e-11
STP Snap23 - Syt7 5 Hz
-4.4888e-12	-7.8021e-12	-7.6851e-12	-8.1e-12	-8.9976e-12	-3.7088e-11	-1.965e-11	0.1399	-5.6738e-11
-7.8663e-12	-8.6377e-12	-1.4139e-11	-1.8672e-11	-1.3472e-11	-6.2826e-11	-1.9073e-11	0.1835	-8.1899e-11
-7.0786e-12	-1.4454e-11	-1.9961e-11	-2.3662e-11	-3.0866e-11	-9.6065e-11	-5.6392e-11	0.0873	-1.5246e-10
9.5133e-13	-5.1177e-12	-8.8181e-12	-1.1228e-11	-1.5361e-11	-3.9591e-11	-1.0728e-11	0.31	-5.0319e-11
-4.7906e-13	-3.533e-12	-5.6378e-12	-8.8911e-12	-1.0587e-11	-2.913e-11	-1.3367e-11	0.1459	-4.2497e-11
-1.5139e-12	-6.4836e-12	-8.1859e-12	-1.3156e-11	-1.5134e-11	-4.4489e-11	-1.9463e-11	0.0109	-6.3952e-11
1.8311e-12	-5.0277e-12	-1.2864e-11	-2.2737e-11	-3.0356e-11	-6.9184e-11	-1.7481e-11	0.0246	-8.6665e-11
1.1043e-12	-5.5839e-12	-1.325e-11	-2.2952e-11	-3.0401e-11	-7.1112e-11	-1.6964e-11	0.0246	-8.8076e-11
-2.6372e-12	-9.3254e-12	-1.6991e-11	-2.6693e-11	-3.4142e-11	-8.983e-11	-2.5946e-11	0.0246	-1.1578e-10
-1.5428e-11	-2.6402e-11	-3.4869e-11	-4.6836e-11	-4.7326e-11	-1.7092e-10	-1.0449e-10	0.0213	-2.7541e-10
-1.7799e-12	-4.7654e-12	-7.3501e-12	-8.6016e-12	-1.0169e-11	-3.2676e-11	-2.117e-11	0.0166	-5.3846e-11
-7.6789e-14	-4.2766e-12	-6.6835e-12	-7.9796e-12	-1.0889e-11	-2.992e-11	-1.5847e-11	0.0996	-4.5767e-11
-1.2419e-13	-1.2161e-12	-1.5257e-12	-4.1346e-12	-4.071e-12	-1.1075e-11	-1.4849e-11	0.1525	-2.5924e-11
-3.2335e-12	-7.5755e-12	-8.4793e-12	-1.0831e-11	-1.2117e-11	-4.2257e-11	-1.955e-11	0.1199	-6.1807e-11
-8.107e-12	-2.1695e-11	-2.3536e-11	-2.3866e-11	-1.7908e-11	-9.5139e-11	-2.5802e-12	0.0334	-9.7719e-11
-8.771e-12	-9.6772e-12	-1.4918e-11	-1.9596e-11	-1.4399e-11	-6.7399e-11	-2.4289e-11	0.0966	-9.1688e-11
-5.5654e-12	-1.3363e-11	-1.1772e-11	-1.268e-11	-1.1611e-11	-5.5006e-11	-4.0349e-11	0.15855	-9.5355e-11
-6.1143e-12	-1.1484e-11	-1.3639e-11	-1.7147e-11	-1.6607e-11	-6.5004e-11	-3.0181e-11	0.0752	-9.5185e-11
-9.768e-12	-1.3151e-11	-1.596e-11	-1.7406e-11	-2.0454e-11	-7.6756e-11	-5.2826e-11	0.07765	-1.2958e-10
-5.0179e-12	-6.2753e-12	-6.9789e-12	-6.3555e-12	-8.6172e-12	-3.3255e-11	-2.5158e-11	0.02465	-5.8413e-11

## Sheet: Figure 5
Snap25 + Syt7
0	0	0	0	0	0	0	0	0	0	0	0	0	0	0	0	0	0	0	0	0	0	0	0	0
0	0	0	0	0	0	0	0	0	0	0	0	0	0	0	0	0	0	0	0	0	0	0	0	0
0	0	0	0	0	0	0	0	0	0	0	0	0	0	0	0	0	0	0	0	0	0	0	0	0
0	0	0	0	0	0	0	0	0	0	0	0	0	0	0	0	0	0	0	0	0	0	0	0	0
0	0	0	0	0	0	0	0	0	0	0	0	0	0	0	0	0	0	0	0	0	0	0	0	0
0	0	0	0	0	0	0	0	0	0	0	0	0	0	0	0	0	0	0	0	0	0	0	0	0
0	0	0	0	0	0	0	0	0	0	0	0	0	0	0	0	0	0	0	0	0	0	0	0	0
0	0	0	0	0	0	0	0	0	0	0	0	0	0	0	0	0	0	0	0	0	0	0	0	0
0	0	0	0	0	0	0	0	0	0	0	0	0	0	0	0	0	0	0	0	0	0	0	0	0
0	0	0	0	0	0	0	0	0	0	0	0	0	0	0	0	0	0	0	0	0	0	0	0	0
0	0	0	0	0	0	0	0	0	0	0	0	0	0	0	0	0	0	0	0	0	0	0	0	0
0	0	0	0	0	0	0	0	0	0	0	0	0	0	0	0	0	0	0	0	0	0	0	0	0
0	0	0	0	0	0	0	0	0	0	0	0	0	0	0	0	0	0	0	0	0	0	0	0	0
0	0	0	0	0	0	0	0	0	0	0	0	0	0	0	0	0	0	0	0	0	0	0	0	0
0	0	0	0	0	0	0	0	0	0	0	0	0	0	0	0	0	0	0	0	0	0	0	0	0
0	0	0	0	0	0	0	0	0	0	0	0	0	0	0	0	0	0	0	0	0	0	0	0	0
0	0	0	0	0	0	0	0	0	0	0	0	0	0	0	0	0	0	0	0	0	0	0	0	0
0	0	0	0	0	0	0	0	0	0	0	0	0	0	0	0	0	0	0	0	0	0	0	0	0
0	0	0	0	0	0	0	0	0	0	0	0	0	0	0	0	0	0	0	0	0	0	0	0	0
0	0	0	0	0	0	0	0	0	0	0	0	0	0	0	0	0	0	0	0	0	0	0	0	0
0	0	0	0	0	0	0	0	0	0	0	0	0	0	0	0	0	0	0	0	0	0	0	0	0
0	0	0	0	0	0	0	0	0	0	0	0	0	0	0	0	0	0	0	0	0	0	0	0	0
0	0	0	0	0	0	0	0	0	0	0	0	0	0	0	0	0	0	0	0	0	0	0	0	0
0	0	0	0	0	0	0	0	0	0	0	0	0	0	0	0	0	0	0	0	0	0	0	0	0
0	0	0	0	0	0	0	0	0	0	0	0	0	0	0	0	0	0	0	0	0	0	0	0	0
0	0	0	0	0	0	0	0	0	0	0	0	0	0	0	0	0	0	0	0	0	0	0	0	0
0	0	0	0	0	0	0	0	0	0	0	0	0	0	0	0	0	0	0	0	0	0	0	0	0
0	0	0	0	0	0	0	0	0	0	0	0	0	0	0	0	0	0	0	0	0	0	0	0	0
0	0	0	0	0	0	0	0	0	0	0	0	0	0	0	0	0	0	0	0	0	0	0	0	0
0	0	0	0	0	0	0	0	0	0	0	0	0	0	0	0	0	0	0	0	0	0	0	0	0
0	0	0	0	0	0	0	0	0	0	0	0	0	0	0	0	0	0	0	0	0	0	0	0	0
0	0	0	0	0	0	0	0	0	0	0	0	0	0	0	0	0	0	0	0	0	0	0	0	0
0	0	0	0	0	0	0	0	0	0	0	0	0	0	0	0	0	0	0	0	0	0	0	0	0
0	0	0	0	0	0	0	0	0	0	0	0	0	0	0	0	0	0	0	0	0	0	0	0	0
0	0	0	0	0	0	0	0	0	0	0	0	0	0	0	0	0	0	0	0	0	0	0	0	0
0	0	0	0	0	0	0	0	0	0	0	0	0	0	0	0	0	0	0	0	0	0	0	0	0
0	0	0	0	0	0	0	0	0	0	0	0	0	0	0	0	0	0	0	0	0	0	0	0	0
0	0	0	0	0	0	0	0	0	0	0	0	0	0	0	0	0	0	0	0	0	0	0	0	0
0	0	0	0	0	0	0	0	0	0	0	0	0	0	0	0	0	0	0	0	0	0	0	0	0
0	0	0	0	0	0	0	0	0	0	0	0	0	0	0	0	0	0	0	0	0	0	0	0	0
0	0	0	0	0	0	0	0	0	0	0	0	0	0	0	0	0	0	0	0	0	0	0	0	0
0	0	0	0	0	0	0	0	0	0	0	0	0	0	0	0	0	0	0	0	0	0	0	0	0
0	0	0	0	0	0	0	0	0	0	0	0	0	0	0	0	0	0	0	0	0	0	0	0	0
0	0	0	0	0	0	0	0	0	0	0	0	0	0	0	0	0	0	0	0	0	0	0	0	0
0	0	0	0	0	0	0	0	0	0	0	0	0	0	0	0	0	0	0	0	0	0	0	0	0
0	0	0	0	0	0	0	0	0	0	0	0	0	0	0	0	0	0	0	0	0	0	0	0	0
0	0	0	0	0	0	0	0	0	0	0	0	0	0	0	0	0	0	0	0	0	0	0	0	0
0	0	0	0	0	0	0	0	0	0	0	0	0	0	0	0	0	0	0	0	0	0	0	0	0
0	0	0	0	0	0	0	0	0	0	0	0	0	0	0	0	0	0	0	0	0	0	0	0	0
0	0	0	0	0	0	0	0	0	0	0	0	0	0	0	0	0	0	0	0	0	0	0	0	0
0	0	0	0	0	0	0	0	0	0	0	0	0	0	0	0	0	0	0	0	0	0	0	0	0
0	0	0	0	0	0	0	0	0	0	0	0	0	0	0	0	0	0	0	0	0	0	0	0	0
0	0	0	0	0	0	0	0	0	0	0	0	0	0	0	0	0	0	0	0	0	0	0	0	0
0	0	0	0	0	0	0	0	0	0	0	0	0	0	0	0	0	0	0	0	0	0	0	0	0
0	0	0	0	0	0	0	0	0	0	0	0	0	0	0	0	0	0	0	0	0	0	0	0	0
0	0	0	0	0	0	0	0	0	0	0	0	0	0	0	0	0	0	0	0	0	0	0	0	0
0	0	0	0	0	0	0	0	0	0	0	0	0	0	0	0	0	0	0	0	0	0	0	0	0
0	0	0	0	0	0	0	0	0	0	0	0	0	0	0	0	0	0	0	0	0	0	0	0	0
0	0	0	0	0	0	0	0	0	0	0	0	0	0	0	0	0	0	0	0	0	0	0	0	0
0	0	0	0	0	0	0	0	0	0	0	0	0	0	0	0	0	0	0	0	0	0	0	0	0
0	0	0	0	0	0	0	0	0	0	0	0	0	0	0	0	0	0	0	0	0	0	0	0	0
0	0	0	0	0	0	0	0	0	0	0	0	0	0	0	0	0	0	0	0	0	0	0	0	0
0	0	0	0	0	0	0	0	0	0	0	0	0	0	0	0	0	0	0	0	0	0	0	0	0
0	0	0	0	0	0	0	0	0	0	0	0	0	0	0	0	0	0	0	0	0	0	0	0	0
0	0	0	0	0	0	0	0	0	0	0	0	0	0	0	0	0	0	0	0	0	0	0	0	0
0	0	0	0	0	0	0	0	0	0	0	0	0	0	0	0	0	0	0	0	0	0	0	0	0
0	0	0	0	0	0	0	0	0	0	0	0	0	0	0	0	0	0	0	0	0	0	0	0	0
0	0	0	0	0	0	0	0	0	0	0	0	0	0	0	0	0	0	0	0	0	0	0	0	0
0	0	0	0	0	0	0	0	0	0	0	0	0	0	0	0	0	0	0	0	0	0	0	0	0
0	0	0	0	0	0	0	0	0	0	0	0	0	0	0	0	0	0	0	0	0	0	0	0	0
0	0	0	0	0	0	0	0	0	0	0	0	0	0	0	0	0	0	0	0	0	0	0	0	0
0	0	0	0	0	0	0	0	0	0	0	0	0	0	0	0	0	0	0	0	0	0	0	0	0
0	0	0	0	0	0	0	0	0	0	0	0	0	0	0	0	0	0	0	0	0	0	0	0	0
0	0	0	0	0	0	0	0	0	0	0	0	0	0	0	0	0	0	0	0	0	0	0	0	0
0	0	0	0	0	0	0	0	0	0	0	0	0	0	0	0	0	0	0	0	0	0	0	0	0
0	0	0	0	0	0	0	0	0	0	0	0	0	0	0	0	0	0	0	0	0	0	0	0	0
0	0	0	0	0	0	0	0	0	0	0	0	0	0	0	0	0	0	0	0	0	0	0	0	0
0	0	0	0	0	0	0	0	0	0	0	0	0	0	0	0	0	0	0	0	0	0	0	0	0
0	0	0	0	0	0	0	0	0	0	0	0	0	0	0	0	0	0	0	0	0	0	0	0	0
0	0	0	0	0	0	0	0	0	0	0	0	0	0	0	0	0	0	0	0	0	0	0	0	0
0	0	0	0	0	0	0	0	0	0	0	0	0	0	0	0	0	0	0	0	0	0	0	0	0
0	0	0	0	0	0	0	0	0	0	0	0	0	0	0	0	0	0	0	0	0	0	0	0	0
0	0	0	0	0	0	0	0	0	0	0	0	0	0	0	0	0	0	0	0	0	0	0	0	0
0	0	0	0	0	0	0	0	0	0	0	0	0	0	0	0	0	0	0	0	0	0	0	0	0
0	0	0	0	0	0	0	0	0	0	0	0	0	0	0	0	0	0	0	0	0	0	0	0	0
0	0	0	0	0	0	0	0	0	0	0	0	0	0	0	0	0	0	0	0	0	0	0	0	0
0	0	0	0	0	0	0	0	0	0	0	0	0	0	0	0	0	0	0	0	0	0	0	0	0
0	0	0	0	0	0	0	0	0	0	0	0	0	0	0	0	0	0	0	0	0	0	0	0	0
0	0	0	0	0	0	0	0	0	0	0	0	0	0	0	0	0	0	0	0	0	0	0	0	0
0	0	0	0	0	0	0	0	0	0	0	0	0	0	0	0	0	0	0	0	0	0	0	0	0
0	0	0	0	0	0	0	0	0	0	0	0	0	0	0	0	0	0	0	0	0	0	0	0	0
0	0	0	0	0	0	0	0	0	0	0	0	0	0	0	0	0	0	0	0	0	0	0	0	0
0	0	0	0	0	0	0	0	0	0	0	0	0	0	0	0	0	0	0	0	0	0	0	0	0
0	0	0	0	0	0	0	0	0	0	0	0	0	0	0	0	0	0	0	0	0	0	0	0	0
0	0	0	0	0	0	0	0	0	0	0	0	0	0	0	0	0	0	0	0	0	0	0	0	0
0	0	0	0	0	0	0	0	0	0	0	0	0	0	0	0	0	0	0	0	0	0	0	0	0
0	0	0	0	0	0	0	0	0	0	0	0	0	0	0	0	0	0	0	0	0	0	0	0	0
0	0	0	0	0	0	0	0	0	0	0	0	0	0	0	0	0	0	0	0	0	0	0	0	0
0	0	0	0	0	0	0	0	0	0	0	0	0	0	0	0	0	0	0	0	0	0	0	0	0
-6.0989e-15	-3.56324e-15	-1.55596e-15	-6.13022e-15	-1.08746e-14	-7.19463e-15	-1.32841e-14	-1.72167e-15	-6.25048e-15	-8.40605e-15	-5.49222e-15	-4.3824e-15	-8.95677e-15	-1.85213e-14	-1.4095e-14	-1.37748e-14	-1.28098e-14	-5.13738e-15	-3.7027e-16	1.88369e-15	-3.09202e-16	-1.09202e-15	-4.72389e-15	0	0
-1.54858e-13	-7.52688e-14	-2.42444e-14	-1.44982e-13	-2.52056e-13	-1.18509e-13	-3.07932e-13	-2.41853e-14	-1.7482e-13	-1.88317e-13	-1.21681e-13	-8.36475e-14	-1.27148e-13	-3.30965e-13	-2.73519e-13	-3.08363e-13	-1.64464e-13	-1.09603e-13	-3.36732e-14	-2.20482e-14	-2.73347e-14	-5.99558e-14	-1.57933e-13	0	0
-5.93125e-13	-2.72467e-13	-7.6978e-14	-5.44195e-13	-9.40365e-13	-3.87136e-13	-1.14886e-12	-7.23124e-14	-6.86346e-13	-6.95137e-13	-4.47562e-13	-2.91635e-13	-3.82658e-13	-1.12269e-12	-9.59826e-13	-1.13799e-12	-4.62617e-13	-3.98107e-13	-1.54226e-13	-1.57151e-13	-1.10661e-13	-2.25924e-13	-5.20124e-13	0	0
-1.32909e-12	-5.9725e-13	-1.59143e-13	-1.21011e-12	-2.08615e-12	-8.11374e-13	-2.54871e-12	-1.44957e-13	-1.55208e-12	-1.53571e-12	-9.87363e-13	-6.29339e-13	-7.69759e-13	-2.39389e-12	-2.077e-12	-2.51384e-12	-8.95998e-13	-8.73858e-13	-3.66824e-13	-4.1327e-13	-2.5089e-13	-4.99413e-13	-1.08836e-12	-3.31994e-18	0
-2.36276e-12	-1.04962e-12	-2.70741e-13	-2.14273e-12	-3.6894e-12	-1.39122e-12	-4.50748e-12	-2.42118e-13	-2.77201e-12	-2.71003e-12	-1.74108e-12	-1.09676e-12	-1.28845e-12	-4.14458e-12	-3.62505e-12	-4.43589e-12	-1.46461e-12	-1.53686e-12	-6.71467e-13	-7.90406e-13	-4.48021e-13	-8.80423e-13	-1.86264e-12	-3.85031e-14	-2.02042e-16
-3.69412e-12	-1.62957e-12	-4.1177e-13	-3.34206e-12	-5.75012e-12	-2.12668e-12	-7.02516e-12	-3.63796e-13	-4.34615e-12	-4.2181e-12	-2.70873e-12	-1.69389e-12	-1.93873e-12	-6.37475e-12	-5.60397e-12	-6.90416e-12	-2.16844e-12	-2.3871e-12	-1.06816e-12	-1.28856e-12	-7.02055e-13	-1.36895e-12	-2.84296e-12	-2.32793e-13	-8.12635e-14
-5.32318e-12	-2.33711e-12	-5.82231e-13	-4.80809e-12	-8.26832e-12	-3.01775e-12	-1.01018e-11	-5.09991e-13	-6.27449e-12	-6.05992e-12	-3.89029e-12	-2.42075e-12	-2.7206e-12	-9.08441e-12	-8.01377e-12	-9.91864e-12	-3.0075e-12	-3.4246e-12	-1.55689e-12	-1.90773e-12	-1.01299e-12	-1.965e-12	-4.02933e-12	-5.95503e-13	-5.62748e-13
-7.24994e-12	-3.17224e-12	-7.82123e-13	-6.54083e-12	-1.1244e-11	-4.06443e-12	-1.37373e-11	-6.80704e-13	-8.55704e-12	-8.23549e-12	-5.28577e-12	-3.27731e-12	-3.63407e-12	-1.22735e-11	-1.08544e-11	-1.34793e-11	-3.98179e-12	-4.64934e-12	-2.13767e-12	-2.64791e-12	-1.38083e-12	-2.66858e-12	-5.42174e-12	-1.12664e-12	-1.52908e-12
-9.4744e-12	-4.13494e-12	-1.01145e-12	-8.54027e-12	-1.46771e-11	-5.26673e-12	-1.79318e-11	-8.75933e-13	-1.11938e-11	-1.07448e-11	-6.89518e-12	-4.2636e-12	-4.67912e-12	-1.59422e-11	-1.4126e-11	-1.75862e-11	-5.09131e-12	-6.06133e-12	-2.8105e-12	-3.50911e-12	-1.80557e-12	-3.47967e-12	-7.02019e-12	-1.82619e-12	-2.98051e-12
-1.19966e-11	-5.22524e-12	-1.2702e-12	-1.08064e-11	-1.85677e-11	-6.62463e-12	-2.26851e-11	-1.09568e-12	-1.41848e-11	-1.35879e-11	-8.7185e-12	-5.3796e-12	-5.85576e-12	-2.00903e-11	-1.78284e-11	-2.22393e-11	-6.33606e-12	-7.66056e-12	-3.57537e-12	-4.53444e-12	-2.28836e-12	-4.39666e-12	-8.827e-12	-2.69416e-12	-4.91717e-12
-1.48164e-11	-6.44312e-12	-1.55839e-12	-1.33393e-11	-2.29158e-11	-8.13814e-12	-2.79974e-11	-1.33994e-12	-1.75299e-11	-1.67647e-11	-1.07557e-11	-6.62531e-12	-7.18397e-12	-2.50137e-11	-2.20762e-11	-2.75501e-11	-7.8801e-12	-9.54001e-12	-4.4918e-12	-6.94608e-12	-3.4538e-12	-5.55176e-12	-1.2408e-11	-3.74029e-12	-7.95032e-12
-1.80259e-11	-7.82537e-12	-1.88823e-12	-1.62134e-11	-2.77456e-11	-9.80272e-12	-3.39603e-11	-1.60661e-12	-2.12808e-11	-2.0332e-11	-1.30658e-11	-8.02325e-12	-9.11708e-12	-3.37008e-11	-2.87503e-11	-3.45632e-11	-1.15436e-11	-1.29668e-11	-6.42925e-12	-1.11962e-11	-6.76605e-12	-7.26902e-12	-2.11542e-11	-5.60857e-12	-1.52423e-11
-2.31478e-11	-9.98239e-12	-2.80508e-12	-2.07871e-11	-3.32902e-11	-1.14533e-11	-4.24539e-11	-1.88568e-12	-2.61362e-11	-2.52358e-11	-1.65914e-11	-9.97053e-12	-1.1382e-11	-4.38199e-11	-3.82674e-11	-4.2353e-11	-1.62105e-11	-1.73608e-11	-9.5626e-12	-1.60687e-11	-1.07544e-11	-8.97057e-12	-3.26292e-11	-8.72233e-12	-2.49166e-11
-3.01963e-11	-1.28035e-11	-5.59879e-12	-2.72132e-11	-3.91558e-11	-1.28258e-11	-5.43107e-11	-2.4217e-12	-3.18892e-11	-3.15749e-11	-2.10595e-11	-1.24394e-11	-1.33727e-11	-5.2497e-11	-4.70085e-11	-4.96489e-11	-2.01201e-11	-2.11238e-11	-1.35792e-11	-2.07989e-11	-1.44859e-11	-1.04985e-11	-4.4789e-11	-1.25722e-11	-3.51145e-11
-3.79916e-11	-1.53307e-11	-9.33806e-12	-3.39858e-11	-4.48965e-11	-1.398e-11	-6.67949e-11	-3.82687e-12	-3.85596e-11	-3.82889e-11	-2.58839e-11	-1.49219e-11	-1.4922e-11	-6.02272e-11	-5.40951e-11	-5.62548e-11	-2.33487e-11	-2.41107e-11	-1.8031e-11	-2.51702e-11	-1.77395e-11	-1.17801e-11	-5.6198e-11	-1.66609e-11	-4.4963e-11
-4.5546e-11	-1.73324e-11	-1.28789e-11	-4.07391e-11	-5.0265e-11	-1.49485e-11	-7.85574e-11	-6.23669e-12	-4.67114e-11	-4.45767e-11	-3.07782e-11	-1.73363e-11	-1.61373e-11	-6.72103e-11	-5.98371e-11	-6.21816e-11	-2.63133e-11	-2.64728e-11	-2.31115e-11	-2.91413e-11	-2.0506e-11	-1.27886e-11	-6.71212e-11	-2.02667e-11	-5.41374e-11
-5.21393e-11	-1.8896e-11	-1.59562e-11	-4.73639e-11	-5.51989e-11	-1.57466e-11	-8.96032e-11	-9.34693e-12	-5.55575e-11	-5.02813e-11	-3.52086e-11	-1.97094e-11	-1.70703e-11	-7.31042e-11	-6.4619e-11	-6.75387e-11	-2.89986e-11	-2.84159e-11	-2.77253e-11	-3.27203e-11	-2.285e-11	-1.3653e-11	-7.82102e-11	-2.32378e-11	-6.26376e-11
-5.77522e-11	-2.01369e-11	-1.85484e-11	-5.36328e-11	-5.98135e-11	-1.64133e-11	-9.95543e-11	-1.25303e-11	-6.38889e-11	-5.54166e-11	-3.89422e-11	-2.21175e-11	-1.77981e-11	-7.78449e-11	-6.85897e-11	-7.23788e-11	-3.13312e-11	-3.00395e-11	-3.15096e-11	-3.59181e-11	-2.48083e-11	-1.43959e-11	-8.84567e-11	-2.57126e-11	-7.04919e-11
-6.25564e-11	-2.11203e-11	-2.07087e-11	-5.94324e-11	-6.42122e-11	-1.69797e-11	-1.08e-10	-1.5381e-11	-7.14283e-11	-5.99657e-11	-4.20168e-11	-2.45419e-11	-1.8394e-11	-8.1887e-11	-7.18555e-11	-7.67641e-11	-3.32263e-11	-3.13707e-11	-3.44587e-11	-3.87555e-11	-2.64672e-11	-1.49914e-11	-9.76633e-11	-2.77756e-11	-7.77121e-11
-6.6804e-11	-2.1905e-11	-2.2504e-11	-6.47281e-11	-6.83111e-11	-1.7464e-11	-1.14967e-10	-1.78514e-11	-7.82802e-11	-6.39852e-11	-4.45989e-11	-2.68373e-11	-1.88996e-11	-8.52621e-11	-7.45583e-11	-8.07404e-11	-3.46805e-11	-3.24566e-11	-3.67391e-11	-4.12386e-11	-2.78652e-11	-1.54749e-11	-1.05843e-10	-2.94767e-11	-8.43384e-11
-7.06623e-11	-2.25309e-11	-2.39993e-11	-6.95647e-11	-7.20612e-11	-1.78754e-11	-1.20707e-10	-2.00109e-11	-8.46139e-11	-6.75287e-11	-4.67501e-11	-2.89424e-11	-1.9305e-11	-8.79634e-11	-7.68198e-11	-8.43483e-11	-3.58103e-11	-3.33385e-11	-3.85446e-11	-4.34001e-11	-2.90497e-11	-1.58725e-11	-1.13064e-10	-3.08745e-11	-9.03782e-11
-7.39537e-11	-2.30417e-11	-2.52529e-11	-7.39738e-11	-7.54776e-11	-1.82286e-11	-1.25499e-10	-2.18939e-11	-9.0231e-11	-7.06508e-11	-4.85073e-11	-3.08699e-11	-1.96338e-11	-9.01097e-11	-7.87419e-11	-8.7638e-11	-3.6712e-11	-3.40884e-11	-3.99765e-11	-4.52666e-11	-3.00513e-11	-1.61981e-11	-1.19417e-10	-3.2033e-11	-9.58844e-11
-7.6675e-11	-2.34553e-11	-2.63151e-11	-7.80069e-11	-7.85727e-11	-1.8531e-11	-1.2951e-10	-2.35128e-11	-9.50031e-11	-7.34083e-11	-4.99612e-11	-3.26405e-11	-1.99034e-11	-9.18341e-11	-8.0366e-11	-9.06487e-11	-3.7461e-11	-3.47111e-11	-4.11559e-11	-4.68822e-11	-3.09024e-11	-1.64691e-11	-1.25008e-10	-3.30148e-11	-1.00917e-10
-7.8976e-11	-2.37919e-11	-2.72047e-11	-8.16914e-11	-8.13619e-11	-1.8799e-11	-1.32905e-10	-2.49019e-11	-9.91272e-11	-7.58381e-11	-5.11936e-11	-3.42416e-11	-2.01353e-11	-9.3233e-11	-8.17395e-11	-9.33667e-11	-3.81095e-11	-3.52077e-11	-4.21301e-11	-4.82695e-11	-3.1612e-11	-1.66964e-11	-1.29898e-10	-3.38557e-11	-1.05528e-10
-8.09805e-11	-2.40663e-11	-2.7956e-11	-8.50426e-11	-8.38666e-11	-1.90445e-11	-1.35809e-10	-2.60958e-11	-1.02758e-10	-7.79596e-11	-5.2264e-11	-3.56653e-11	-2.0331e-11	-9.43764e-11	-8.29067e-11	-9.58268e-11	-3.86532e-11	-3.56051e-11	-4.29412e-11	-4.94323e-11	-3.22045e-11	-1.68876e-11	-1.34204e-10	-3.45499e-11	-1.09745e-10
-8.26963e-11	-2.42961e-11	-2.8601e-11	-8.81525e-11	-8.61153e-11	-1.92565e-11	-1.38298e-10	-2.71309e-11	-1.05807e-10	-7.98193e-11	-5.31539e-11	-3.69281e-11	-2.05021e-11	-9.53281e-11	-8.39114e-11	-9.80604e-11	-3.91191e-11	-3.59361e-11	-4.36229e-11	-5.04135e-11	-3.27101e-11	-1.70533e-11	-1.38031e-10	-3.51363e-11	-1.13584e-10
-8.42725e-11	-2.4543e-11	-2.92055e-11	-9.11104e-11	-8.82712e-11	-1.95094e-11	-1.40657e-10	-2.8069e-11	-1.08583e-10	-8.16122e-11	-5.39952e-11	-3.81219e-11	-2.06918e-11	-9.62829e-11	-8.49095e-11	-1.00279e-10	-3.95646e-11	-3.62975e-11	-4.42673e-11	-5.13099e-11	-3.31866e-11	-1.72397e-11	-1.41592e-10	-3.56241e-11	-1.17069e-10
-8.58594e-11	-2.48658e-11	-2.9787e-11	-9.39982e-11	-9.04791e-11	-1.98726e-11	-1.43129e-10	-2.89595e-11	-1.11266e-10	-8.34921e-11	-5.49078e-11	-3.9303e-11	-2.09336e-11	-9.7418e-11	-8.60375e-11	-1.02692e-10	-4.00256e-11	-3.67857e-11	-4.4937e-11	-5.21948e-11	-3.36753e-11	-1.75043e-11	-1.45087e-10	-3.6029e-11	-1.20248e-10
-8.74637e-11	-2.52676e-11	-3.03452e-11	-9.68206e-11	-9.27455e-11	-2.0349e-11	-1.45726e-10	-2.98045e-11	-1.13867e-10	-8.54656e-11	-5.58971e-11	-4.04736e-11	-2.12284e-11	-9.87415e-11	-8.7302e-11	-1.05306e-10	-4.05036e-11	-3.74059e-11	-4.56354e-11	-5.30723e-11	-3.41772e-11	-1.7848e-11	-1.48519e-10	-3.63665e-11	-1.23129e-10
-8.90855e-11	-2.57485e-11	-3.08801e-11	-9.95774e-11	-9.50703e-11	-2.09387e-11	-1.48448e-10	-3.06041e-11	-1.16383e-10	-8.75328e-11	-5.69631e-11	-4.16334e-11	-2.15762e-11	-1.00253e-10	-8.87032e-11	-1.08124e-10	-4.09985e-11	-3.81582e-11	-4.63623e-11	-5.39423e-11	-3.46923e-11	-1.82709e-11	-1.51888e-10	-3.6684e-11	-1.25761e-10
-9.07246e-11	-2.63085e-11	-3.13917e-11	-1.02269e-10	-9.74536e-11	-2.16417e-11	-1.51295e-10	-3.13584e-11	-1.18817e-10	-8.96937e-11	-5.81058e-11	-4.27826e-11	-2.19771e-11	-1.01954e-10	-9.02408e-11	-1.11145e-10	-4.15103e-11	-3.90424e-11	-4.71178e-11	-5.48048e-11	-3.52207e-11	-1.87728e-11	-1.55195e-10	-3.70696e-11	-1.28216e-10
-9.23812e-11	-2.69474e-11	-3.18801e-11	-1.04895e-10	-9.98953e-11	-2.24578e-11	-1.54266e-10	-3.20672e-11	-1.21166e-10	-9.19482e-11	-5.93252e-11	-4.39211e-11	-2.24311e-11	-1.03843e-10	-9.19151e-11	-1.14368e-10	-4.2039e-11	-4.00588e-11	-4.79019e-11	-5.56599e-11	-3.57622e-11	-1.93538e-11	-1.58439e-10	-3.75331e-11	-1.30632e-10
-9.40552e-11	-2.76654e-11	-3.23452e-11	-1.07455e-10	-1.02395e-10	-2.33873e-11	-1.57362e-10	-3.27306e-11	-1.23433e-10	-9.42964e-11	-6.06214e-11	-4.50489e-11	-2.29381e-11	-1.0592e-10	-9.3726e-11	-1.17795e-10	-4.25847e-11	-4.12072e-11	-4.87146e-11	-5.65076e-11	-3.63169e-11	-2.0014e-11	-1.6162e-10	-3.80742e-11	-1.33044e-10
-9.57466e-11	-2.84625e-11	-3.2787e-11	-1.0995e-10	-1.04954e-10	-2.44299e-11	-1.60583e-10	-3.33487e-11	-1.25615e-10	-9.67384e-11	-6.19942e-11	-4.61661e-11	-2.34981e-11	-1.08185e-10	-9.56734e-11	-1.21424e-10	-4.31473e-11	-4.24876e-11	-4.95559e-11	-5.73478e-11	-3.68848e-11	-2.07532e-11	-1.64739e-10	-3.86932e-11	-1.35453e-10
-9.74555e-11	-2.93386e-11	-3.32056e-11	-1.12379e-10	-1.07571e-10	-2.55858e-11	-1.63928e-10	-3.39213e-11	-1.27715e-10	-9.92739e-11	-6.34438e-11	-4.72726e-11	-2.41112e-11	-1.10639e-10	-9.77574e-11	-1.25256e-10	-4.37269e-11	-4.39e-11	-5.04257e-11	-5.8198e-11	-3.74652e-11	-2.15702e-11	-1.6779e-10	-3.93899e-11	-1.37859e-10
-9.91817e-11	-3.02937e-11	-3.36008e-11	-1.14743e-10	-1.10247e-10	-2.6855e-11	-1.67398e-10	-3.44485e-11	-1.29731e-10	-1.01903e-10	-6.49701e-11	-4.83685e-11	-2.47845e-11	-1.13492e-10	-1.0002e-10	-1.29392e-10	-4.43914e-11	-4.54966e-11	-5.13303e-11	-5.9881e-11	-3.82004e-11	-2.26399e-11	-1.70735e-10	-4.01667e-11	-1.40474e-10
-1.00987e-10	-3.13506e-11	-3.39756e-11	-1.17087e-10	-1.13012e-10	-2.82449e-11	-1.71055e-10	-3.49284e-11	-1.31669e-10	-1.04678e-10	-6.66084e-11	-4.94676e-11	-2.5821e-11	-1.19229e-10	-1.03503e-10	-1.34941e-10	-4.64326e-11	-4.82184e-11	-5.26164e-11	-6.34075e-11	-4.0222e-11	-2.44217e-11	-1.76323e-10	-4.12995e-11	-1.45074e-10
-1.04306e-10	-3.3074e-11	-3.45379e-11	-1.20433e-10	-1.16383e-10	-2.98318e-11	-1.76306e-10	-3.53683e-11	-1.33693e-10	-1.08628e-10	-6.91114e-11	-5.09348e-11	-2.74808e-11	-1.26992e-10	-1.09268e-10	-1.4141e-10	-5.01221e-11	-5.23047e-11	-5.48729e-11	-6.78433e-11	-4.3032e-11	-2.62721e-11	-1.84525e-10	-4.30719e-11	-1.5184e-10
-1.10123e-10	-3.57419e-11	-3.64497e-11	-1.25381e-10	-1.20304e-10	-3.147e-11	-1.84645e-10	-3.60431e-11	-1.36001e-10	-1.14192e-10	-7.25771e-11	-5.30106e-11	-2.91155e-11	-1.33925e-10	-1.15037e-10	-1.47757e-10	-5.33229e-11	-5.60154e-11	-5.78778e-11	-7.24317e-11	-4.57277e-11	-2.79496e-11	-1.93737e-10	-4.55691e-11	-1.59642e-10
-1.17179e-10	-3.85659e-11	-3.98315e-11	-1.30844e-10	-1.24266e-10	-3.29924e-11	-1.95257e-10	-3.74201e-11	-1.38638e-10	-1.20611e-10	-7.64776e-11	-5.53306e-11	-3.04358e-11	-1.39972e-10	-1.19741e-10	-1.53693e-10	-5.58865e-11	-5.90015e-11	-6.1435e-11	-7.67475e-11	-4.80531e-11	-2.9306e-11	-2.02741e-10	-4.85534e-11	-1.67481e-10
-1.24265e-10	-4.09103e-11	-4.33928e-11	-1.36372e-10	-1.27978e-10	-3.43556e-11	-2.06349e-10	-4.00178e-11	-1.41558e-10	-1.27298e-10	-8.13802e-11	-5.77044e-11	-3.14347e-11	-1.45216e-10	-1.23555e-10	-1.59087e-10	-5.82547e-11	-6.14236e-11	-6.55677e-11	-8.06748e-11	-4.999e-11	-3.04218e-11	-2.11067e-10	-5.13587e-11	-1.74882e-10
-1.30634e-10	-4.27634e-11	-4.66425e-11	-1.41866e-10	-1.31359e-10	-3.5532e-11	-2.17228e-10	-4.34238e-11	-1.44666e-10	-1.33779e-10	-8.65919e-11	-6.01071e-11	-3.22168e-11	-1.49534e-10	-1.26707e-10	-1.63965e-10	-6.05532e-11	-6.34179e-11	-6.98207e-11	-8.41978e-11	-5.15728e-11	-3.13297e-11	-2.19267e-10	-5.37212e-11	-1.81765e-10
-1.36126e-10	-4.42248e-11	-4.95466e-11	-1.47149e-10	-1.34562e-10	-3.65299e-11	-2.27821e-10	-4.70081e-11	-1.47932e-10	-1.39855e-10	-9.14312e-11	-6.26047e-11	-3.28433e-11	-1.52991e-10	-1.29323e-10	-1.68347e-10	-6.24929e-11	-6.51377e-11	-7.35895e-11	-8.73067e-11	-5.28812e-11	-3.21292e-11	-2.27138e-10	-5.56475e-11	-1.88096e-10
-1.40862e-10	-4.53977e-11	-5.21436e-11	-1.52088e-10	-1.37748e-10	-3.73736e-11	-2.37583e-10	-5.04149e-11	-1.51141e-10	-1.45409e-10	-9.5606e-11	-6.52272e-11	-3.33414e-11	-1.55735e-10	-1.31494e-10	-1.72286e-10	-6.3959e-11	-6.65618e-11	-7.67611e-11	-9.00152e-11	-5.39647e-11	-3.27958e-11	-2.34241e-10	-5.72209e-11	-1.93907e-10
-1.45113e-10	-4.63486e-11	-5.43805e-11	-1.56641e-10	-1.40864e-10	-3.80997e-11	-2.46154e-10	-5.35641e-11	-1.5427e-10	-1.50427e-10	-9.9071e-11	-6.78577e-11	-3.3746e-11	-1.57982e-10	-1.3329e-10	-1.75853e-10	-6.50804e-11	-6.77226e-11	-7.93941e-11	-9.23803e-11	-5.48672e-11	-3.33177e-11	-2.40561e-10	-5.85198e-11	-1.99255e-10
-1.48972e-10	-4.71532e-11	-5.63047e-11	-1.60812e-10	-1.43771e-10	-3.87366e-11	-2.5353e-10	-5.64244e-11	-1.57535e-10	-1.54918e-10	-1.01943e-10	-7.03236e-11	-3.40818e-11	-1.59824e-10	-1.34783e-10	-1.79087e-10	-6.59571e-11	-6.867e-11	-8.14838e-11	-9.44116e-11	-5.56406e-11	-3.37259e-11	-2.46195e-10	-5.96237e-11	-2.04183e-10
-1.52363e-10	-4.78334e-11	-5.79762e-11	-1.6461e-10	-1.46378e-10	-3.92958e-11	-2.59888e-10	-5.89101e-11	-1.60732e-10	-1.58911e-10	-1.04326e-10	-7.26046e-11	-3.43558e-11	-1.61309e-10	-1.36016e-10	-1.82019e-10	-6.67065e-11	-6.94453e-11	-8.31489e-11	-9.61535e-11	-5.62979e-11	-3.40548e-11	-2.51182e-10	-6.05629e-11	-2.08692e-10
-1.55272e-10	-4.84039e-11	-5.9443e-11	-1.68082e-10	-1.48692e-10	-3.97856e-11	-2.65419e-10	-6.10778e-11	-1.63517e-10	-1.62445e-10	-1.06334e-10	-7.46988e-11	-3.45883e-11	-1.62513e-10	-1.37049e-10	-1.84676e-10	-6.73935e-11	-7.00865e-11	-8.45433e-11	-9.7673e-11	-5.68497e-11	-3.43285e-11	-2.55563e-10	-6.13521e-11	-2.12844e-10
-1.57733e-10	-4.88934e-11	-6.07387e-11	-1.71282e-10	-1.5075e-10	-4.02156e-11	-2.70208e-10	-6.29454e-11	-1.65892e-10	-1.65581e-10	-1.08035e-10	-7.65914e-11	-3.47955e-11	-1.63508e-10	-1.37928e-10	-1.87073e-10	-6.79996e-11	-7.06126e-11	-8.57223e-11	-9.90075e-11	-5.73034e-11	-3.45617e-11	-2.59391e-10	-6.20093e-11	-2.16681e-10
-1.59852e-10	-4.93059e-11	-6.19042e-11	-1.74219e-10	-1.52576e-10	-4.0601e-11	-2.74403e-10	-6.45699e-11	-1.67895e-10	-1.68365e-10	-1.09493e-10	-7.83123e-11	-3.49757e-11	-1.64362e-10	-1.38689e-10	-1.89235e-10	-6.85203e-11	-7.10499e-11	-8.66852e-11	-1.00178e-10	-5.76894e-11	-3.47601e-11	-2.62724e-10	-6.25615e-11	-2.20212e-10
-1.6178e-10	-4.96478e-11	-6.29407e-11	-1.76896e-10	-1.54204e-10	-4.09381e-11	-2.78106e-10	-6.60475e-11	-1.69615e-10	-1.70854e-10	-1.10756e-10	-7.98893e-11	-3.51339e-11	-1.65141e-10	-1.3936e-10	-1.91197e-10	-6.89528e-11	-7.14181e-11	-8.74916e-11	-1.01223e-10	-5.80201e-11	-3.49315e-11	-2.65613e-10	-6.30514e-11	-2.23464e-10
-1.63646e-10	-4.99904e-11	-6.39014e-11	-1.79427e-10	-1.55746e-10	-4.13178e-11	-2.81553e-10	-6.74218e-11	-1.71225e-10	-1.7318e-10	-1.11918e-10	-8.13711e-11	-3.53068e-11	-1.65925e-10	-1.40028e-10	-1.93113e-10	-6.93487e-11	-7.17929e-11	-8.82484e-11	-1.02225e-10	-5.8343e-11	-3.51296e-11	-2.68306e-10	-6.34658e-11	-2.26458e-10
-1.65431e-10	-5.03961e-11	-6.48268e-11	-1.81889e-10	-1.57306e-10	-4.18249e-11	-2.84953e-10	-6.87167e-11	-1.72837e-10	-1.75474e-10	-1.13083e-10	-8.28209e-11	-3.55223e-11	-1.66821e-10	-1.40773e-10	-1.95131e-10	-6.97628e-11	-7.22426e-11	-8.90095e-11	-1.03229e-10	-5.86941e-11	-3.53964e-11	-2.7101e-10	-6.38073e-11	-2.29239e-10
-1.67132e-10	-5.08682e-11	-6.57185e-11	-1.84286e-10	-1.5889e-10	-4.24636e-11	-2.88316e-10	-6.99349e-11	-1.74458e-10	-1.77743e-10	-1.14258e-10	-8.42422e-11	-3.57812e-11	-1.67834e-10	-1.416e-10	-1.97259e-10	-7.01979e-11	-7.27708e-11	-8.97775e-11	-1.04235e-10	-5.90739e-11	-3.57325e-11	-2.73727e-10	-6.41073e-11	-2.31849e-10
-1.68751e-10	-5.14064e-11	-6.65764e-11	-1.86617e-10	-1.60499e-10	-4.32337e-11	-2.91641e-10	-7.10762e-11	-1.76085e-10	-1.79987e-10	-1.15442e-10	-8.56351e-11	-3.60836e-11	-1.68965e-10	-1.42508e-10	-1.99495e-10	-7.06541e-11	-7.33776e-11	-9.05522e-11	-1.05244e-10	-5.94824e-11	-3.61378e-11	-2.76459e-10	-6.44068e-11	-2.3428e-10
-1.70287e-10	-5.20109e-11	-6.74005e-11	-1.88883e-10	-1.62131e-10	-4.41353e-11	-2.94928e-10	-7.21408e-11	-1.77721e-10	-1.82206e-10	-1.16635e-10	-8.69995e-11	-3.64294e-11	-1.70213e-10	-1.43499e-10	-2.01842e-10	-7.11314e-11	-7.40627e-11	-9.13338e-11	-1.06256e-10	-5.99196e-11	-3.66125e-11	-2.79205e-10	-6.47693e-11	-2.36554e-10
-1.71739e-10	-5.26817e-11	-6.81909e-11	-1.91083e-10	-1.63788e-10	-4.51685e-11	-2.98178e-10	-7.31286e-11	-1.79363e-10	-1.84399e-10	-1.17838e-10	-8.83353e-11	-3.68186e-11	-1.71578e-10	-1.44571e-10	-2.04297e-10	-7.16297e-11	-7.48264e-11	-9.21222e-11	-1.07271e-10	-6.03856e-11	-3.71564e-11	-2.81964e-10	-6.52029e-11	-2.38755e-10
-1.73109e-10	-5.34186e-11	-6.89475e-11	-1.93218e-10	-1.65469e-10	-4.63331e-11	-3.0139e-10	-7.40396e-11	-1.81013e-10	-1.86567e-10	-1.1905e-10	-8.96428e-11	-3.72513e-11	-1.7306e-10	-1.45725e-10	-2.06862e-10	-7.21491e-11	-7.56686e-11	-9.29175e-11	-1.08288e-10	-6.08802e-11	-3.77696e-11	-2.84737e-10	-6.57077e-11	-2.40909e-10
-1.74395e-10	-5.42218e-11	-6.96703e-11	-1.95288e-10	-1.67174e-10	-4.76292e-11	-3.04565e-10	-7.48739e-11	-1.82671e-10	-1.8871e-10	-1.20271e-10	-9.09218e-11	-3.77275e-11	-1.7466e-10	-1.46961e-10	-2.09536e-10	-7.26895e-11	-7.65892e-11	-9.37195e-11	-1.09308e-10	-6.14036e-11	-3.84522e-11	-2.87524e-10	-6.62837e-11	-2.43016e-10
-1.75599e-10	-5.50912e-11	-7.03594e-11	-1.97292e-10	-1.68903e-10	-4.90569e-11	-3.07702e-10	-7.56313e-11	-1.84336e-10	-1.90828e-10	-1.21501e-10	-9.21724e-11	-3.8247e-11	-1.76377e-10	-1.48279e-10	-2.1232e-10	-7.3251e-11	-7.75884e-11	-9.45283e-11	-1.10337e-10	-6.19551e-11	-3.92028e-11	-2.90321e-10	-6.69308e-11	-2.45076e-10
-1.76719e-10	-5.60269e-11	-7.10147e-11	-1.99231e-10	-1.70656e-10	-5.0616e-11	-3.10802e-10	-7.6312e-11	-1.86009e-10	-1.9292e-10	-1.22741e-10	-9.33944e-11	-3.88155e-11	-1.78353e-10	-1.497e-10	-2.15281e-10	-7.38794e-11	-7.8694e-11	-9.53431e-11	-1.11846e-10	-6.25302e-11	-4.00741e-11	-2.92822e-10	-6.76495e-11	-2.47173e-10
-1.77781e-10	-5.70433e-11	-7.16383e-11	-2.01123e-10	-1.72452e-10	-5.2311e-11	-3.13901e-10	-7.69151e-11	-1.87715e-10	-1.95017e-10	-1.24014e-10	-9.45931e-11	-3.9667e-11	-1.82667e-10	-1.51872e-10	-2.19478e-10	-7.57324e-11	-8.05169e-11	-9.63112e-11	-1.14767e-10	-6.38915e-11	-4.15176e-11	-2.97249e-10	-6.85202e-11	-2.50362e-10
-1.79533e-10	-5.84882e-11	-7.23782e-11	-2.03536e-10	-1.74707e-10	-5.41564e-11	-3.18041e-10	-7.744e-11	-1.90088e-10	-1.9788e-10	-1.25923e-10	-9.59226e-11	-4.10463e-11	-1.88794e-10	-1.5569e-10	-2.24989e-10	-7.94163e-11	-8.33539e-11	-9.79269e-11	-1.18576e-10	-6.59126e-11	-4.29893e-11	-3.04086e-10	-6.99312e-11	-2.55168e-10
-1.8308e-10	-6.06497e-11	-7.41888e-11	-2.07135e-10	-1.77568e-10	-5.59018e-11	-3.24549e-10	-7.80839e-11	-1.93239e-10	-2.02458e-10	-1.28619e-10	-9.76273e-11	-4.24686e-11	-1.94273e-10	-1.59894e-10	-2.30635e-10	-8.27675e-11	-8.6131e-11	-1.00033e-10	-1.22689e-10	-6.79308e-11	-4.43361e-11	-3.11775e-10	-7.19039e-11	-2.60894e-10
-1.88034e-10	-6.31606e-11	-7.73412e-11	-2.11333e-10	-1.80571e-10	-5.73622e-11	-3.3284e-10	-7.9197e-11	-1.96847e-10	-2.08226e-10	-1.31316e-10	-9.97004e-11	-4.36565e-11	-1.99047e-10	-1.63444e-10	-2.35972e-10	-8.53741e-11	-8.85227e-11	-1.02475e-10	-1.26679e-10	-6.96725e-11	-4.54894e-11	-3.19499e-10	-7.42474e-11	-2.66752e-10
-1.93481e-10	-6.53795e-11	-8.07988e-11	-2.15675e-10	-1.83435e-10	-5.85771e-11	-3.41697e-10	-8.11349e-11	-2.01361e-10	-2.14297e-10	-1.33731e-10	-1.01921e-10	-4.46063e-11	-2.03429e-10	-1.66295e-10	-2.40864e-10	-8.76179e-11	-9.05755e-11	-1.05499e-10	-1.30323e-10	-7.11215e-11	-4.64279e-11	-3.26722e-10	-7.65169e-11	-2.72302e-10
-1.98496e-10	-6.71693e-11	-8.40361e-11	-2.20038e-10	-1.86026e-10	-5.96173e-11	-3.50382e-10	-8.38656e-11	-2.06917e-10	-2.20172e-10	-1.35859e-10	-1.04192e-10	-4.53289e-11	-2.075e-10	-1.68636e-10	-2.45282e-10	-8.98211e-11	-9.22815e-11	-1.08892e-10	-1.33561e-10	-7.2321e-11	-4.719e-11	-3.33679e-10	-7.84817e-11	-2.77421e-10
-2.02764e-10	-6.8601e-11	-8.69611e-11	-2.24326e-10	-1.88439e-10	-6.05245e-11	-3.58878e-10	-8.68399e-11	-2.12446e-10	-2.25668e-10	-1.37656e-10	-1.0647e-10	-4.58756e-11	-2.10852e-10	-1.70683e-10	-2.49282e-10	-9.17448e-11	-9.37528e-11	-1.11775e-10	-1.36372e-10	-7.32988e-11	-4.78471e-11	-3.40419e-10	-8.01355e-11	-2.82124e-10
-2.0633e-10	-6.97525e-11	-8.95138e-11	-2.28359e-10	-1.90952e-10	-6.13535e-11	-3.66902e-10	-8.96955e-11	-2.17463e-10	-2.30653e-10	-1.39146e-10	-1.08795e-10	-4.63072e-11	-2.13629e-10	-1.72455e-10	-2.52902e-10	-9.33547e-11	-9.49985e-11	-1.14387e-10	-1.38788e-10	-7.40904e-11	-4.83829e-11	-3.46493e-10	-8.14831e-11	-2.86402e-10
-2.09447e-10	-7.06993e-11	-9.17255e-11	-2.32119e-10	-1.93821e-10	-6.21159e-11	-3.74054e-10	-9.23583e-11	-2.22112e-10	-2.35139e-10	-1.40387e-10	-1.11071e-10	-4.66647e-11	-2.16027e-10	-1.73934e-10	-2.56172e-10	-9.47311e-11	-9.60243e-11	-1.16786e-10	-1.40868e-10	-7.47453e-11	-4.88277e-11	-3.51951e-10	-8.25775e-11	-2.90327e-10
-2.12265e-10	-7.14966e-11	-9.36287e-11	-2.35593e-10	-1.96677e-10	-6.27967e-11	-3.80267e-10	-9.47451e-11	-2.26383e-10	-2.39142e-10	-1.41421e-10	-1.13198e-10	-4.69596e-11	-2.17959e-10	-1.75183e-10	-2.59134e-10	-9.58776e-11	-9.68636e-11	-1.18786e-10	-1.42645e-10	-7.52859e-11	-4.92093e-11	-3.56787e-10	-8.34806e-11	-2.93937e-10
-2.1478e-10	-7.21741e-11	-9.52594e-11	-2.38768e-10	-1.99288e-10	-6.34072e-11	-3.85676e-10	-9.68038e-11	-2.3018e-10	-2.42703e-10	-1.42305e-10	-1.15182e-10	-4.7206e-11	-2.19478e-10	-1.76207e-10	-2.61814e-10	-9.67903e-11	-9.75679e-11	-1.20385e-10	-1.44169e-10	-7.57393e-11	-4.9526e-11	-3.6101e-10	-8.42228e-11	-2.97272e-10
-2.16919e-10	-7.27429e-11	-9.66786e-11	-2.41682e-10	-2.01613e-10	-6.39475e-11	-3.90423e-10	-9.85991e-11	-2.33509e-10	-2.45885e-10	-1.43067e-10	-1.17008e-10	-4.74083e-11	-2.20715e-10	-1.77055e-10	-2.64238e-10	-9.75622e-11	-9.81483e-11	-1.21694e-10	-1.45457e-10	-7.61339e-11	-4.98132e-11	-3.64704e-10	-8.48386e-11	-3.00359e-10
-2.18701e-10	-7.32184e-11	-9.79715e-11	-2.44402e-10	-2.0365e-10	-6.44302e-11	-3.94564e-10	-1.00157e-10	-2.3637e-10	-2.48699e-10	-1.43739e-10	-1.18659e-10	-4.75821e-11	-2.21749e-10	-1.77787e-10	-2.66408e-10	-9.82208e-11	-9.86212e-11	-1.22775e-10	-1.4658e-10	-7.64789e-11	-5.00561e-11	-3.67959e-10	-8.53571e-11	-3.03214e-10
-2.20202e-10	-7.3618e-11	-9.91382e-11	-2.46951e-10	-2.05406e-10	-6.48684e-11	-3.98229e-10	-1.01515e-10	-2.38719e-10	-2.51211e-10	-1.44312e-10	-1.20125e-10	-4.7734e-11	-2.22615e-10	-1.78413e-10	-2.68349e-10	-9.87675e-11	-9.9018e-11	-1.23689e-10	-1.47588e-10	-7.67746e-11	-5.02679e-11	-3.70796e-10	-8.57969e-11	-3.05846e-10
-2.21559e-10	-7.3961e-11	-1.00173e-10	-2.49298e-10	-2.06944e-10	-6.52737e-11	-4.01502e-10	-1.02695e-10	-2.4065e-10	-2.53488e-10	-1.44817e-10	-1.21456e-10	-4.78696e-11	-2.23343e-10	-1.78963e-10	-2.7009e-10	-9.92503e-11	-9.93732e-11	-1.24465e-10	-1.48491e-10	-7.7028e-11	-5.04567e-11	-3.73282e-10	-8.61826e-11	-3.08277e-10
-2.22897e-10	-7.43071e-11	-1.01135e-10	-2.51519e-10	-2.08397e-10	-6.57301e-11	-4.04583e-10	-1.03785e-10	-2.42374e-10	-2.55628e-10	-1.45332e-10	-1.22709e-10	-4.8017e-11	-2.24065e-10	-1.79519e-10	-2.71774e-10	-9.97215e-11	-9.97461e-11	-1.25184e-10	-1.49346e-10	-7.7275e-11	-5.066e-11	-3.75668e-10	-8.65282e-11	-3.10538e-10
-2.24193e-10	-7.47044e-11	-1.02062e-10	-2.53679e-10	-2.09849e-10	-6.63148e-11	-4.07629e-10	-1.04827e-10	-2.44044e-10	-2.5772e-10	-1.45901e-10	-1.23927e-10	-4.81983e-11	-2.24905e-10	-1.80134e-10	-2.73544e-10	-1.00207e-10	-1.0018e-10	-1.25922e-10	-1.50203e-10	-7.75542e-11	-5.09231e-11	-3.78097e-10	-8.68305e-11	-3.12644e-10
-2.25447e-10	-7.5155e-11	-1.02953e-10	-2.55782e-10	-2.11306e-10	-6.70316e-11	-4.10645e-10	-1.0582e-10	-2.45669e-10	-2.59769e-10	-1.46528e-10	-1.25111e-10	-4.8414e-11	-2.25869e-10	-1.8081e-10	-2.75406e-10	-1.00707e-10	-1.00676e-10	-1.26681e-10	-1.51064e-10	-7.78664e-11	-5.12469e-11	-3.80572e-10	-8.70804e-11	-3.14626e-10
-2.26658e-10	-7.56588e-11	-1.03811e-10	-2.57825e-10	-2.12767e-10	-6.78805e-11	-4.13633e-10	-1.06765e-10	-2.47249e-10	-2.61774e-10	-1.47213e-10	-1.26263e-10	-4.86641e-11	-2.26957e-10	-1.81545e-10	-2.77361e-10	-1.01223e-10	-1.01236e-10	-1.27462e-10	-1.5193e-10	-7.82115e-11	-5.16314e-11	-3.83093e-10	-8.73208e-11	-3.16505e-10
-2.27827e-10	-7.62159e-11	-1.04635e-10	-2.59811e-10	-2.14231e-10	-6.88614e-11	-4.16592e-10	-1.07662e-10	-2.48784e-10	-2.63735e-10	-1.47955e-10	-1.27382e-10	-4.89487e-11	-2.28169e-10	-1.82342e-10	-2.79407e-10	-1.01755e-10	-1.0186e-10	-1.28265e-10	-1.52799e-10	-7.85896e-11	-5.20767e-11	-3.85659e-10	-8.76246e-11	-3.183e-10
-2.28953e-10	-7.68263e-11	-1.05424e-10	-2.61738e-10	-2.15699e-10	-6.99744e-11	-4.19521e-10	-1.08511e-10	-2.50274e-10	-2.65653e-10	-1.48756e-10	-1.28467e-10	-4.92677e-11	-2.29505e-10	-1.83198e-10	-2.81546e-10	-1.02302e-10	-1.02546e-10	-1.29089e-10	-1.53673e-10	-7.90005e-11	-5.25828e-11	-3.88271e-10	-8.80006e-11	-3.20078e-10
-2.30037e-10	-7.749e-11	-1.0618e-10	-2.63607e-10	-2.17171e-10	-7.12195e-11	-4.22422e-10	-1.09312e-10	-2.51718e-10	-2.67528e-10	-1.49614e-10	-1.2952e-10	-4.9621e-11	-2.30964e-10	-1.84115e-10	-2.83778e-10	-1.02865e-10	-1.03296e-10	-1.29935e-10	-1.54551e-10	-7.94445e-11	-5.31496e-11	-3.90928e-10	-8.84487e-11	-3.21846e-10
-2.31077e-10	-7.82069e-11	-1.06901e-10	-2.65417e-10	-2.18647e-10	-7.25967e-11	-4.25294e-10	-1.10065e-10	-2.53117e-10	-2.69359e-10	-1.50529e-10	-1.30539e-10	-5.00088e-11	-2.32548e-10	-1.85093e-10	-2.86101e-10	-1.03443e-10	-1.04109e-10	-1.30802e-10	-1.55433e-10	-7.99213e-11	-5.37772e-11	-3.93631e-10	-8.89689e-11	-3.23606e-10
-2.32075e-10	-7.89771e-11	-1.07588e-10	-2.67169e-10	-2.20126e-10	-7.41059e-11	-4.28138e-10	-1.1077e-10	-2.54471e-10	-2.71146e-10	-1.51502e-10	-1.31525e-10	-5.0431e-11	-2.34255e-10	-1.86131e-10	-2.88517e-10	-1.04037e-10	-1.04985e-10	-1.31691e-10	-1.56322e-10	-8.04306e-11	-5.44646e-11	-3.96377e-10	-8.95612e-11	-3.25356e-10
-2.33031e-10	-7.98006e-11	-1.08241e-10	-2.68863e-10	-2.2161e-10	-7.57472e-11	-4.30952e-10	-1.11427e-10	-2.5578e-10	-2.7289e-10	-1.52533e-10	-1.32478e-10	-5.0892e-11	-2.36201e-10	-1.87243e-10	-2.91084e-10	-1.04675e-10	-1.05945e-10	-1.32597e-10	-1.57547e-10	-8.09212e-11	-5.51993e-11	-3.98628e-10	-9.02252e-11	-3.27138e-10
-2.33963e-10	-8.06851e-11	-1.08862e-10	-2.70508e-10	-2.23104e-10	-7.75262e-11	-4.33759e-10	-1.12036e-10	-2.57043e-10	-2.7461e-10	-1.53629e-10	-1.33402e-10	-5.15661e-11	-2.40228e-10	-1.88907e-10	-2.94782e-10	-1.06186e-10	-1.07412e-10	-1.33537e-10	-1.59964e-10	-8.19757e-11	-5.63919e-11	-4.0182e-10	-9.09701e-11	-3.2953e-10
-2.35474e-10	-8.18964e-11	-1.09564e-10	-2.72421e-10	-2.24819e-10	-7.95297e-11	-4.37239e-10	-1.1259e-10	-2.58302e-10	-2.76989e-10	-1.55066e-10	-1.34381e-10	-5.26451e-11	-2.46033e-10	-1.91921e-10	-2.99655e-10	-1.08988e-10	-1.09607e-10	-1.34893e-10	-1.6325e-10	-8.3718e-11	-5.76106e-11	-4.07252e-10	-9.19735e-11	-3.33068e-10
-2.38338e-10	-8.38825e-11	-1.10959e-10	-2.75083e-10	-2.26956e-10	-8.14675e-11	-4.42415e-10	-1.1319e-10	-2.59745e-10	-2.81105e-10	-1.57208e-10	-1.35641e-10	-5.39182e-11	-2.51254e-10	-1.95354e-10	-3.04681e-10	-1.11505e-10	-1.1188e-10	-1.36631e-10	-1.66842e-10	-8.55198e-11	-5.87074e-11	-4.13958e-10	-9.33487e-11	-3.37484e-10
-2.42246e-10	-8.63027e-11	-1.13575e-10	-2.78363e-10	-2.29246e-10	-8.3149e-11	-4.49097e-10	-1.14102e-10	-2.61263e-10	-2.86455e-10	-1.60042e-10	-1.37412e-10	-5.50138e-11	-2.55676e-10	-1.98419e-10	-3.09444e-10	-1.13488e-10	-1.13798e-10	-1.38661e-10	-1.70358e-10	-8.70728e-11	-5.96726e-11	-4.20723e-10	-9.50694e-11	-3.42153e-10
-2.46569e-10	-8.842e-11	-1.16804e-10	-2.81968e-10	-2.31434e-10	-8.45892e-11	-4.56592e-10	-1.15694e-10	-2.62791e-10	-2.92329e-10	-1.63658e-10	-1.39478e-10	-5.5847e-11	-2.59514e-10	-2.00956e-10	-3.13778e-10	-1.15288e-10	-1.15366e-10	-1.41066e-10	-1.73648e-10	-8.83949e-11	-6.04721e-11	-4.26984e-10	-9.68133e-11	-3.46596e-10
-2.50586e-10	-9.00998e-11	-1.19964e-10	-2.85686e-10	-2.33443e-10	-8.5828e-11	-4.64424e-10	-1.18085e-10	-2.64312e-10	-2.9834e-10	-1.67459e-10	-1.41576e-10	-5.64692e-11	-2.62751e-10	-2.0311e-10	-3.17699e-10	-1.17194e-10	-1.16671e-10	-1.43659e-10	-1.76654e-10	-8.94804e-11	-6.11108e-11	-4.32781e-10	-9.83776e-11	-3.50691e-10
-2.53991e-10	-9.14316e-11	-1.22912e-10	-2.89382e-10	-2.35264e-10	-8.69083e-11	-4.72216e-10	-1.20933e-10	-2.65795e-10	-3.04215e-10	-1.70845e-10	-1.43528e-10	-5.69471e-11	-2.65407e-10	-2.04957e-10	-3.21228e-10	-1.19015e-10	-1.17812e-10	-1.46016e-10	-1.79285e-10	-9.04051e-11	-6.16525e-11	-4.38227e-10	-9.97046e-11	-3.54425e-10
-2.56807e-10	-9.25452e-11	-1.25591e-10	-2.92919e-10	-2.36975e-10	-8.79018e-11	-4.795e-10	-1.23801e-10	-2.67194e-10	-3.09627e-10	-1.73761e-10	-1.4535e-10	-5.73253e-11	-2.67642e-10	-2.06495e-10	-3.2442e-10	-1.20432e-10	-1.18805e-10	-1.48045e-10	-1.81539e-10	-9.11698e-11	-6.20972e-11	-4.43246e-10	-1.00824e-10	-3.57867e-10
-2.59186e-10	-9.34668e-11	-1.28007e-10	-2.96206e-10	-2.38595e-10	-8.87966e-11	-4.86004e-10	-1.26563e-10	-2.68511e-10	-3.14487e-10	-1.76289e-10	-1.47054e-10	-5.76316e-11	-2.69442e-10	-2.07728e-10	-3.27328e-10	-1.21535e-10	-1.19645e-10	-1.49957e-10	-1.83443e-10	-9.17878e-11	-6.24749e-11	-4.47764e-10	-1.01761e-10	-3.61056e-10
-2.61262e-10	-9.42268e-11	-1.30168e-10	-2.99219e-10	-2.40091e-10	-8.95785e-11	-4.91764e-10	-1.29129e-10	-2.69841e-10	-3.18865e-10	-1.78355e-10	-1.48642e-10	-5.78838e-11	-2.70896e-10	-2.0877e-10	-3.29963e-10	-1.22486e-10	-1.20376e-10	-1.51683e-10	-1.85076e-10	-9.22894e-11	-6.27963e-11	-4.51809e-10	-1.02529e-10	-3.64008e-10
-2.6311e-10	-9.48675e-11	-1.32089e-10	-3.01988e-10	-2.41466e-10	-9.02751e-11	-4.96852e-10	-1.31409e-10	-2.712e-10	-3.22785e-10	-1.80063e-10	-1.50097e-10	-5.8097e-11	-2.72108e-10	-2.09673e-10	-3.32356e-10	-1.233e-10	-1.20994e-10	-1.53149e-10	-1.86495e-10	-9.26974e-11	-6.3068e-11	-4.55479e-10	-1.03181e-10	-3.66727e-10
-2.64694e-10	-9.5427e-11	-1.33805e-10	-3.04544e-10	-2.4271e-10	-9.08852e-11	-5.0134e-10	-1.33416e-10	-2.72566e-10	-3.26304e-10	-1.81485e-10	-1.51428e-10	-5.82762e-11	-2.73161e-10	-2.10476e-10	-3.34516e-10	-1.23948e-10	-1.21517e-10	-1.5442e-10	-1.87693e-10	-9.30341e-11	-6.32932e-11	-4.58717e-10	-1.03738e-10	-3.69268e-10
-2.66027e-10	-9.5905e-11	-1.35365e-10	-3.06911e-10	-2.43842e-10	-9.14556e-11	-5.05327e-10	-1.35186e-10	-2.73887e-10	-3.29483e-10	-1.8268e-10	-1.52636e-10	-5.84302e-11	-2.74055e-10	-2.11161e-10	-3.36495e-10	-1.24464e-10	-1.21968e-10	-1.55567e-10	-1.88722e-10	-9.33174e-11	-6.34824e-11	-4.61584e-10	-1.04213e-10	-3.71662e-10
-2.67164e-10	-9.63249e-11	-1.36748e-10	-3.09092e-10	-2.44864e-10	-9.1982e-11	-5.0891e-10	-1.36757e-10	-2.75059e-10	-3.3234e-10	-1.8371e-10	-1.53741e-10	-5.85657e-11	-2.74826e-10	-2.11733e-10	-3.38291e-10	-1.24918e-10	-1.22375e-10	-1.5652e-10	-1.89625e-10	-9.35586e-11	-6.36455e-11	-4.64087e-10	-1.04621e-10	-3.73924e-10
-2.68208e-10	-9.66994e-11	-1.37997e-10	-3.11092e-10	-2.45798e-10	-9.24874e-11	-5.12184e-10	-1.38153e-10	-2.76125e-10	-3.34902e-10	-1.84612e-10	-1.54741e-10	-5.87003e-11	-2.75526e-10	-2.12258e-10	-3.39913e-10	-1.25353e-10	-1.22731e-10	-1.57326e-10	-1.90379e-10	-9.37642e-11	-6.37847e-11	-4.66347e-10	-1.04976e-10	-3.76032e-10
-2.69207e-10	-9.70716e-11	-1.39174e-10	-3.13002e-10	-2.46709e-10	-9.30306e-11	-5.15266e-10	-1.39435e-10	-2.77147e-10	-3.37289e-10	-1.85452e-10	-1.55688e-10	-5.88619e-11	-2.76231e-10	-2.12776e-10	-3.41488e-10	-1.25772e-10	-1.23098e-10	-1.58064e-10	-1.91065e-10	-9.39735e-11	-6.39459e-11	-4.68492e-10	-1.05305e-10	-3.78019e-10
-2.70193e-10	-9.74915e-11	-1.40297e-10	-3.14864e-10	-2.47651e-10	-9.36679e-11	-5.18282e-10	-1.40659e-10	-2.7815e-10	-3.39595e-10	-1.86301e-10	-1.56624e-10	-5.90603e-11	-2.77016e-10	-2.13332e-10	-3.43129e-10	-1.2619e-10	-1.23522e-10	-1.58803e-10	-1.9176e-10	-9.42189e-11	-6.41716e-11	-4.7068e-10	-1.05606e-10	-3.79905e-10
-2.71168e-10	-9.79619e-11	-1.41366e-10	-3.16678e-10	-2.48626e-10	-9.44021e-11	-5.21238e-10	-1.41825e-10	-2.79133e-10	-3.41824e-10	-1.87164e-10	-1.5755e-10	-5.92961e-11	-2.77883e-10	-2.13927e-10	-3.44841e-10	-1.26608e-10	-1.24004e-10	-1.59548e-10	-1.92465e-10	-9.45008e-11	-6.4462e-11	-4.72911e-10	-1.0587e-10	-3.81683e-10
-2.72132e-10	-9.84827e-11	-1.42381e-10	-3.18446e-10	-2.49634e-10	-9.52334e-11	-5.24134e-10	-1.42935e-10	-2.80098e-10	-3.43975e-10	-1.8804e-10	-1.58467e-10	-5.95695e-11	-2.78834e-10	-2.14561e-10	-3.46624e-10	-1.27026e-10	-1.24545e-10	-1.60298e-10	-1.93182e-10	-9.48192e-11	-6.48173e-11	-4.75187e-10	-1.06115e-10	-3.83373e-10
-2.73084e-10	-9.9054e-11	-1.43342e-10	-3.20167e-10	-2.50675e-10	-9.61617e-11	-5.2697e-10	-1.43988e-10	-2.81044e-10	-3.4605e-10	-1.8893e-10	-1.59373e-10	-5.98803e-11	-2.79867e-10	-2.15236e-10	-3.48479e-10	-1.27445e-10	-1.25144e-10	-1.61052e-10	-1.93911e-10	-9.5174e-11	-6.52374e-11	-4.77507e-10	-1.06425e-10	-3.85008e-10
-2.74025e-10	-9.96757e-11	-1.44249e-10	-3.21841e-10	-2.5175e-10	-9.7187e-11	-5.29746e-10	-1.44985e-10	-2.81971e-10	-3.48047e-10	-1.89834e-10	-1.6027e-10	-6.02285e-11	-2.80983e-10	-2.1595e-10	-3.50404e-10	-1.27863e-10	-1.25802e-10	-1.61812e-10	-1.9465e-10	-9.55652e-11	-6.57223e-11	-4.79872e-10	-1.06807e-10	-3.86623e-10
-2.74955e-10	-1.00348e-10	-1.45102e-10	-3.23468e-10	-2.52857e-10	-9.83093e-11	-5.32461e-10	-1.45925e-10	-2.8288e-10	-3.49967e-10	-1.90751e-10	-1.61157e-10	-6.06143e-11	-2.82182e-10	-2.16704e-10	-3.52402e-10	-1.28282e-10	-1.26519e-10	-1.62577e-10	-1.95401e-10	-9.59929e-11	-6.6272e-11	-4.82282e-10	-1.07262e-10	-3.88225e-10
-2.75873e-10	-1.01071e-10	-1.45902e-10	-3.25048e-10	-2.53998e-10	-9.95286e-11	-5.35117e-10	-1.46808e-10	-2.8377e-10	-3.5181e-10	-1.91682e-10	-1.62034e-10	-6.10375e-11	-2.83464e-10	-2.17498e-10	-3.5447e-10	-1.28701e-10	-1.27294e-10	-1.63347e-10	-1.96164e-10	-9.64571e-11	-6.68865e-11	-4.84736e-10	-1.0779e-10	-3.89815e-10
-2.76781e-10	-1.01844e-10	-1.46647e-10	-3.26582e-10	-2.55172e-10	-1.00845e-10	-5.37713e-10	-1.47634e-10	-2.84642e-10	-3.53576e-10	-1.92627e-10	-1.62901e-10	-6.14981e-11	-2.84829e-10	-2.18331e-10	-3.5661e-10	-1.2912e-10	-1.28128e-10	-1.64122e-10	-1.9694e-10	-9.69574e-11	-6.75655e-11	-4.87234e-10	-1.08391e-10	-3.91393e-10
-2.77677e-10	-1.02667e-10	-1.47339e-10	-3.28068e-10	-2.56379e-10	-1.02258e-10	-5.40248e-10	-1.48404e-10	-2.85494e-10	-3.55265e-10	-1.93585e-10	-1.63759e-10	-6.19991e-11	-2.86355e-10	-2.1922e-10	-3.5886e-10	-1.29569e-10	-1.29035e-10	-1.64897e-10	-1.98001e-10	-9.74689e-11	-6.84162e-11	-4.89394e-10	-1.09065e-10	-3.92975e-10
-2.7857e-10	-1.03551e-10	-1.47977e-10	-3.29512e-10	-2.57624e-10	-1.03771e-10	-5.42741e-10	-1.49117e-10	-2.86328e-10	-3.56886e-10	-1.94562e-10	-1.64606e-10	-6.27149e-11	-2.89595e-10	-2.20625e-10	-3.62101e-10	-1.30898e-10	-1.30278e-10	-1.65617e-10	-2.00154e-10	-9.83989e-11	-6.97526e-11	-4.92428e-10	-1.09846e-10	-3.94934e-10
-2.79804e-10	-1.04832e-10	-1.48622e-10	-3.31124e-10	-2.59055e-10	-1.05392e-10	-5.4572e-10	-1.49763e-10	-2.87168e-10	-3.58824e-10	-1.95779e-10	-1.65456e-10	-6.38676e-11	-2.94679e-10	-2.23199e-10	-3.66677e-10	-1.33563e-10	-1.32026e-10	-1.66498e-10	-2.03285e-10	-9.98721e-11	-7.11424e-11	-4.97289e-10	-1.10845e-10	-3.9778e-10
-2.8194e-10	-1.06763e-10	-1.49811e-10	-3.33271e-10	-2.60839e-10	-1.06916e-10	-5.5001e-10	-1.50359e-10	-2.88367e-10	-3.61844e-10	-1.97588e-10	-1.66514e-10	-6.50436e-11	-2.99411e-10	-2.26345e-10	-3.71528e-10	-1.3607e-10	-1.33905e-10	-1.67698e-10	-2.06661e-10	-1.01351e-10	-7.2405e-11	-5.03314e-10	-1.1211e-10	-4.01385e-10
-2.84833e-10	-1.08956e-10	-1.52208e-10	-3.35817e-10	-2.62751e-10	-1.0823e-10	-5.55732e-10	-1.51097e-10	-2.90341e-10	-3.65722e-10	-1.99746e-10	-1.6779e-10	-6.60532e-11	-3.03386e-10	-2.29231e-10	-3.76187e-10	-1.38059e-10	-1.35615e-10	-1.69189e-10	-2.09965e-10	-1.0261e-10	-7.35351e-11	-5.09359e-10	-1.13582e-10	-4.05251e-10
-2.883e-10	-1.10953e-10	-1.55275e-10	-3.38616e-10	-2.64566e-10	-1.09324e-10	-5.62145e-10	-1.52366e-10	-2.92736e-10	-3.70029e-10	-2.02609e-10	-1.69142e-10	-6.68511e-11	-3.06964e-10	-2.31612e-10	-3.80475e-10	-1.39887e-10	-1.37042e-10	-1.70963e-10	-2.13072e-10	-1.03654e-10	-7.44691e-11	-5.14983e-10	-1.15032e-10	-4.08918e-10
-2.91679e-10	-1.12634e-10	-1.58311e-10	-3.41567e-10	-2.66219e-10	-1.10235e-10	-5.68573e-10	-1.54327e-10	-2.95385e-10	-3.74653e-10	-2.06111e-10	-1.70508e-10	-6.75007e-11	-3.10305e-10	-2.33547e-10	-3.84394e-10	-1.4168e-10	-1.38219e-10	-1.72981e-10	-2.15814e-10	-1.04556e-10	-7.52342e-11	-5.2028e-10	-1.16322e-10	-4.12249e-10
-2.94552e-10	-1.14019e-10	-1.61139e-10	-3.44562e-10	-2.67741e-10	-1.11013e-10	-5.74877e-10	-1.5673e-10	-2.98591e-10	-3.79384e-10	-2.09548e-10	-1.71903e-10	-6.80272e-11	-3.13044e-10	-2.35105e-10	-3.87944e-10	-1.43375e-10	-1.39217e-10	-1.74801e-10	-2.18172e-10	-1.05317e-10	-7.58994e-11	-5.25403e-10	-1.17416e-10	-4.15284e-10
-2.96878e-10	-1.15184e-10	-1.63698e-10	-3.47448e-10	-2.69186e-10	-1.11708e-10	-5.80836e-10	-1.5921e-10	-3.02063e-10	-3.8406e-10	-2.12614e-10	-1.73285e-10	-6.84398e-11	-3.15356e-10	-2.36379e-10	-3.91137e-10	-1.44928e-10	-1.40068e-10	-1.76381e-10	-2.20165e-10	-1.0594e-10	-7.64504e-11	-5.30129e-10	-1.18349e-10	-4.18077e-10
-2.98832e-10	-1.16154e-10	-1.65962e-10	-3.50149e-10	-2.7054e-10	-1.12352e-10	-5.86423e-10	-1.61557e-10	-3.05614e-10	-3.8849e-10	-2.15297e-10	-1.74584e-10	-6.87764e-11	-3.17479e-10	-2.37425e-10	-3.94026e-10	-1.46204e-10	-1.40774e-10	-1.77703e-10	-2.21884e-10	-1.06452e-10	-7.68915e-11	-5.34354e-10	-1.19122e-10	-4.20652e-10
-3.00596e-10	-1.1696e-10	-1.67991e-10	-3.52697e-10	-2.71802e-10	-1.12918e-10	-5.91494e-10	-1.63784e-10	-3.09187e-10	-3.9255e-10	-2.17582e-10	-1.75797e-10	-6.90649e-11	-3.19316e-10	-2.38363e-10	-3.96636e-10	-1.47189e-10	-1.41372e-10	-1.78946e-10	-2.2338e-10	-1.0687e-10	-7.72579e-11	-5.38119e-10	-1.19748e-10	-4.23074e-10
-3.02127e-10	-1.17634e-10	-1.69829e-10	-3.5509e-10	-2.72945e-10	-1.13429e-10	-5.96037e-10	-1.6576e-10	-3.12313e-10	-3.9624e-10	-2.1947e-10	-1.76935e-10	-6.93434e-11	-3.20803e-10	-2.39201e-10	-3.98987e-10	-1.47993e-10	-1.41902e-10	-1.80254e-10	-2.24653e-10	-1.07213e-10	-7.75681e-11	-5.41475e-10	-1.20274e-10	-4.25381e-10
-3.0347e-10	-1.18203e-10	-1.71508e-10	-3.5734e-10	-2.73948e-10	-1.13895e-10	-6.00117e-10	-1.67484e-10	-3.14973e-10	-3.99588e-10	-2.21066e-10	-1.7797e-10	-6.95774e-11	-3.22036e-10	-2.3996e-10	-4.01112e-10	-1.48657e-10	-1.42357e-10	-1.81554e-10	-2.25723e-10	-1.07496e-10	-7.78395e-11	-5.44434e-10	-1.20732e-10	-4.27562e-10
-3.04637e-10	-1.18687e-10	-1.73067e-10	-3.59444e-10	-2.7484e-10	-1.14308e-10	-6.03752e-10	-1.69024e-10	-3.17181e-10	-4.02591e-10	-2.22398e-10	-1.78922e-10	-6.97723e-11	-3.23084e-10	-2.4064e-10	-4.03034e-10	-1.49184e-10	-1.42746e-10	-1.82663e-10	-2.26628e-10	-1.07737e-10	-7.80788e-11	-5.47102e-10	-1.21159e-10	-4.29609e-10
-3.05651e-10	-1.19092e-10	-1.74506e-10	-3.61412e-10	-2.75648e-10	-1.147e-10	-6.0708e-10	-1.70398e-10	-3.19016e-10	-4.05305e-10	-2.23538e-10	-1.79782e-10	-6.99401e-11	-3.23974e-10	-2.41237e-10	-4.04811e-10	-1.49658e-10	-1.43084e-10	-1.83598e-10	-2.2741e-10	-1.07945e-10	-7.82907e-11	-5.49573e-10	-1.2154e-10	-4.3154e-10
-3.06573e-10	-1.19432e-10	-1.75817e-10	-3.63232e-10	-2.76396e-10	-1.15095e-10	-6.10065e-10	-1.71644e-10	-3.20568e-10	-4.07808e-10	-2.24552e-10	-1.80556e-10	-7.00931e-11	-3.24762e-10	-2.41803e-10	-4.06444e-10	-1.50087e-10	-1.43383e-10	-1.84462e-10	-2.28113e-10	-1.08134e-10	-7.84914e-11	-5.51911e-10	-1.21871e-10	-4.33348e-10
-3.07458e-10	-1.19759e-10	-1.77053e-10	-3.64959e-10	-2.7713e-10	-1.15514e-10	-6.12866e-10	-1.728e-10	-3.21971e-10	-4.10151e-10	-2.25506e-10	-1.81302e-10	-7.02581e-11	-3.25545e-10	-2.42395e-10	-4.0802e-10	-1.5051e-10	-1.4371e-10	-1.85267e-10	-2.28776e-10	-1.08333e-10	-7.87037e-11	-5.54162e-10	-1.22161e-10	-4.35048e-10
-3.08325e-10	-1.20124e-10	-1.78247e-10	-3.66646e-10	-2.77884e-10	-1.15973e-10	-6.1562e-10	-1.73899e-10	-3.23337e-10	-4.12403e-10	-2.26439e-10	-1.82052e-10	-7.04496e-11	-3.264e-10	-2.43042e-10	-4.09643e-10	-1.50946e-10	-1.44097e-10	-1.86067e-10	-2.29446e-10	-1.08569e-10	-7.89636e-11	-5.56444e-10	-1.22432e-10	-4.3667e-10
-3.09176e-10	-1.20528e-10	-1.79402e-10	-3.68294e-10	-2.78662e-10	-1.16473e-10	-6.18335e-10	-1.74944e-10	-3.24672e-10	-4.14568e-10	-2.27354e-10	-1.82809e-10	-7.06672e-11	-3.27331e-10	-2.43747e-10	-4.1132e-10	-1.51397e-10	-1.44545e-10	-1.86863e-10	-2.30126e-10	-1.08842e-10	-7.92719e-11	-5.58758e-10	-1.22689e-10	-4.38261e-10
-3.10011e-10	-1.20973e-10	-1.80518e-10	-3.69905e-10	-2.79462e-10	-1.17016e-10	-6.21009e-10	-1.75935e-10	-3.25976e-10	-4.16646e-10	-2.2825e-10	-1.83572e-10	-7.0911e-11	-3.28338e-10	-2.44509e-10	-4.1305e-10	-1.51862e-10	-1.45053e-10	-1.87656e-10	-2.30815e-10	-1.09152e-10	-7.96286e-11	-5.61104e-10	-1.22946e-10	-4.39795e-10
-3.10829e-10	-1.21458e-10	-1.81595e-10	-3.71477e-10	-2.80286e-10	-1.176e-10	-6.23644e-10	-1.76871e-10	-3.27248e-10	-4.18637e-10	-2.29128e-10	-1.84342e-10	-7.11809e-11	-3.29421e-10	-2.45327e-10	-4.14832e-10	-1.52341e-10	-1.45621e-10	-1.88445e-10	-2.31514e-10	-1.09499e-10	-8.00338e-11	-5.63482e-10	-1.23263e-10	-4.41264e-10
-3.11632e-10	-1.21983e-10	-1.82633e-10	-3.73011e-10	-2.81132e-10	-1.18226e-10	-6.2624e-10	-1.77754e-10	-3.2849e-10	-4.20542e-10	-2.29987e-10	-1.85118e-10	-7.1477e-11	-3.3058e-10	-2.46204e-10	-4.16668e-10	-1.52834e-10	-1.46249e-10	-1.89232e-10	-2.32222e-10	-1.09883e-10	-8.04874e-11	-5.65893e-10	-1.23644e-10	-4.4271e-10
-3.12418e-10	-1.22548e-10	-1.83632e-10	-3.74507e-10	-2.82001e-10	-1.18893e-10	-6.28795e-10	-1.78582e-10	-3.297e-10	-4.2236e-10	-2.30827e-10	-1.859e-10	-7.17993e-11	-3.31816e-10	-2.47137e-10	-4.18557e-10	-1.53341e-10	-1.46939e-10	-1.90015e-10	-2.32941e-10	-1.10304e-10	-8.09895e-11	-5.68335e-10	-1.2409e-10	-4.44144e-10
-3.13188e-10	-1.23153e-10	-1.84592e-10	-3.75965e-10	-2.82892e-10	-1.19602e-10	-6.31311e-10	-1.79356e-10	-3.30878e-10	-4.2409e-10	-2.31649e-10	-1.86688e-10	-7.21478e-11	-3.33127e-10	-2.48128e-10	-4.20499e-10	-1.53862e-10	-1.47688e-10	-1.90796e-10	-2.33669e-10	-1.10763e-10	-8.154e-11	-5.70809e-10	-1.246e-10	-4.45568e-10
-3.13943e-10	-1.23799e-10	-1.85512e-10	-3.77385e-10	-2.83807e-10	-1.20353e-10	-6.33787e-10	-1.80076e-10	-3.32026e-10	-4.25734e-10	-2.32453e-10	-1.87483e-10	-7.25224e-11	-3.34515e-10	-2.49176e-10	-4.22494e-10	-1.54398e-10	-1.48498e-10	-1.91573e-10	-2.34407e-10	-1.11258e-10	-8.21386e-11	-5.73315e-10	-1.25176e-10	-4.4698e-10
-3.1468e-10	-1.24484e-10	-1.86394e-10	-3.78766e-10	-2.84744e-10	-1.21146e-10	-6.36224e-10	-1.80742e-10	-3.33142e-10	-4.27291e-10	-2.33237e-10	-1.88283e-10	-7.2925e-11	-3.36042e-10	-2.50287e-10	-4.24573e-10	-1.54962e-10	-1.49375e-10	-1.9234e-10	-2.3533e-10	-1.11743e-10	-8.28486e-11	-5.75457e-10	-1.25816e-10	-4.4839e-10
-3.15407e-10	-1.25219e-10	-1.87237e-10	-3.80111e-10	-2.85705e-10	-1.21983e-10	-6.38634e-10	-1.81353e-10	-3.34225e-10	-4.28768e-10	-2.34008e-10	-1.8909e-10	-7.35129e-11	-3.39015e-10	-2.51649e-10	-4.27411e-10	-1.56152e-10	-1.50532e-10	-1.93035e-10	-2.37168e-10	-1.12547e-10	-8.39992e-11	-5.78014e-10	-1.26493e-10	-4.50064e-10
-3.16303e-10	-1.2633e-10	-1.88053e-10	-3.81528e-10	-2.86752e-10	-1.22985e-10	-6.41487e-10	-1.8189e-10	-3.35251e-10	-4.30471e-10	-2.34946e-10	-1.89911e-10	-7.46475e-11	-3.43757e-10	-2.53671e-10	-4.31359e-10	-1.58721e-10	-1.52183e-10	-1.93927e-10	-2.39908e-10	-1.13747e-10	-8.52349e-11	-5.82233e-10	-1.27248e-10	-4.52483e-10
-3.17819e-10	-1.28253e-10	-1.89119e-10	-3.83326e-10	-2.88048e-10	-1.24259e-10	-6.45275e-10	-1.82379e-10	-3.36244e-10	-4.32909e-10	-2.36315e-10	-1.90857e-10	-7.61363e-11	-3.48203e-10	-2.56118e-10	-4.35588e-10	-1.61272e-10	-1.53857e-10	-1.95078e-10	-2.4307e-10	-1.15013e-10	-8.63773e-11	-5.87623e-10	-1.28187e-10	-4.55556e-10
-3.20153e-10	-1.30484e-10	-1.91e-10	-3.85489e-10	-2.89501e-10	-1.25532e-10	-6.49994e-10	-1.83037e-10	-3.37183e-10	-4.35994e-10	-2.38023e-10	-1.91948e-10	-7.75601e-11	-3.52014e-10	-2.58543e-10	-4.39691e-10	-1.63434e-10	-1.55272e-10	-1.96447e-10	-2.46141e-10	-1.16161e-10	-8.73178e-11	-5.93016e-10	-1.29321e-10	-4.58867e-10
-3.22979e-10	-1.32491e-10	-1.93535e-10	-3.87939e-10	-2.90966e-10	-1.26688e-10	-6.55242e-10	-1.84119e-10	-3.38082e-10	-4.39609e-10	-2.40216e-10	-1.93087e-10	-7.86868e-11	-3.55384e-10	-2.607e-10	-4.43524e-10	-1.65418e-10	-1.56487e-10	-1.97981e-10	-2.48968e-10	-1.17095e-10	-8.80517e-11	-5.97997e-10	-1.30534e-10	-4.62111e-10
-3.25776e-10	-1.34143e-10	-1.96195e-10	-3.90619e-10	-2.92328e-10	-1.27709e-10	-6.60675e-10	-1.85855e-10	-3.38929e-10	-4.43499e-10	-2.42975e-10	-1.94246e-10	-7.95682e-11	-3.58158e-10	-2.62508e-10	-4.47066e-10	-1.6743e-10	-1.57539e-10	-1.99664e-10	-2.51535e-10	-1.17861e-10	-8.86524e-11	-6.02724e-10	-1.31666e-10	-4.65161e-10
-3.28285e-10	-1.35482e-10	-1.98718e-10	-3.93364e-10	-2.9359e-10	-1.28607e-10	-6.66258e-10	-1.88064e-10	-3.39717e-10	-4.47439e-10	-2.45873e-10	-1.95386e-10	-8.02939e-11	-3.6047e-10	-2.64062e-10	-4.5032e-10	-1.69217e-10	-1.58463e-10	-2.01144e-10	-2.53765e-10	-1.18503e-10	-8.91744e-11	-6.07187e-10	-1.32689e-10	-4.67951e-10
-3.30397e-10	-1.36588e-10	-2.01002e-10	-3.96059e-10	-2.94787e-10	-1.29428e-10	-6.71648e-10	-1.90402e-10	-3.40456e-10	-4.51315e-10	-2.48586e-10	-1.96429e-10	-8.08925e-11	-3.62362e-10	-2.65372e-10	-4.53312e-10	-1.70705e-10	-1.59267e-10	-2.02368e-10	-2.55679e-10	-1.19035e-10	-8.96274e-11	-6.11273e-10	-1.33569e-10	-4.70548e-10
-3.3221e-10	-1.3753e-10	-2.03027e-10	-3.98616e-10	-2.95947e-10	-1.3017e-10	-6.76624e-10	-1.92687e-10	-3.41151e-10	-4.55055e-10	-2.51036e-10	-1.97427e-10	-8.13687e-11	-3.63876e-10	-2.66461e-10	-4.56054e-10	-1.71835e-10	-1.59964e-10	-2.03437e-10	-2.57312e-10	-1.19483e-10	-9.00001e-11	-6.15111e-10	-1.34311e-10	-4.72955e-10
-3.33825e-10	-1.38357e-10	-2.04807e-10	-4.00966e-10	-2.97053e-10	-1.30867e-10	-6.8111e-10	-1.94826e-10	-3.41835e-10	-4.58567e-10	-2.53199e-10	-1.98426e-10	-8.17583e-11	-3.65123e-10	-2.67393e-10	-4.58555e-10	-1.72711e-10	-1.60562e-10	-2.0441e-10	-2.58678e-10	-1.19866e-10	-9.03183e-11	-6.1868e-10	-1.34938e-10	-4.75188e-10
-3.35257e-10	-1.3909e-10	-2.06419e-10	-4.03119e-10	-2.98042e-10	-1.31521e-10	-6.85148e-10	-1.9674e-10	-3.42519e-10	-4.61767e-10	-2.55098e-10	-1.99391e-10	-8.20887e-11	-3.6615e-10	-2.68229e-10	-4.60849e-10	-1.73419e-10	-1.61089e-10	-2.05499e-10	-2.59853e-10	-1.20183e-10	-9.06072e-11	-6.21844e-10	-1.355e-10	-4.77262e-10
-3.36544e-10	-1.39739e-10	-2.07894e-10	-4.05129e-10	-2.98941e-10	-1.32114e-10	-6.8878e-10	-1.9843e-10	-3.43214e-10	-4.64655e-10	-2.56791e-10	-2.00254e-10	-8.23625e-11	-3.6704e-10	-2.68988e-10	-4.62952e-10	-1.73997e-10	-1.6156e-10	-2.06711e-10	-2.60904e-10	-1.20462e-10	-9.0861e-11	-6.24698e-10	-1.35991e-10	-4.79227e-10
-3.37696e-10	-1.40306e-10	-2.09235e-10	-4.07012e-10	-2.99773e-10	-1.32637e-10	-6.92059e-10	-1.99923e-10	-3.43935e-10	-4.6724e-10	-2.58248e-10	-2.01041e-10	-8.25897e-11	-3.67827e-10	-2.697e-10	-4.64909e-10	-1.74553e-10	-1.61986e-10	-2.07825e-10	-2.61843e-10	-1.20697e-10	-9.10858e-11	-6.27238e-10	-1.36407e-10	-4.8111e-10
-3.38705e-10	-1.40798e-10	-2.10434e-10	-4.08772e-10	-3.00536e-10	-1.3311e-10	-6.95041e-10	-2.0125e-10	-3.4463e-10	-4.69595e-10	-2.59531e-10	-2.0179e-10	-8.27883e-11	-3.68535e-10	-2.70345e-10	-4.66713e-10	-1.75046e-10	-1.62361e-10	-2.08839e-10	-2.62706e-10	-1.20894e-10	-9.13055e-11	-6.29489e-10	-1.36758e-10	-4.82936e-10
-3.39582e-10	-1.41241e-10	-2.11541e-10	-4.10408e-10	-3.01254e-10	-1.33565e-10	-6.97784e-10	-2.02448e-10	-3.4526e-10	-4.71767e-10	-2.6067e-10	-2.02504e-10	-8.29611e-11	-3.6916e-10	-2.70899e-10	-4.68363e-10	-1.75531e-10	-1.62682e-10	-2.09735e-10	-2.63472e-10	-1.21067e-10	-9.15001e-11	-6.31524e-10	-1.37075e-10	-4.84727e-10
-3.40411e-10	-1.41684e-10	-2.12598e-10	-4.11965e-10	-3.01957e-10	-1.34033e-10	-7.00368e-10	-2.03571e-10	-3.45848e-10	-4.73835e-10	-2.61724e-10	-2.03195e-10	-8.31337e-11	-3.69827e-10	-2.71428e-10	-4.6995e-10	-1.75986e-10	-1.63001e-10	-2.10523e-10	-2.64185e-10	-1.21255e-10	-9.17094e-11	-6.33496e-10	-1.37389e-10	-4.86408e-10
-3.41224e-10	-1.42181e-10	-2.13623e-10	-4.13487e-10	-3.02679e-10	-1.34552e-10	-7.029e-10	-2.04647e-10	-3.4645e-10	-4.75856e-10	-2.62757e-10	-2.03891e-10	-8.33308e-11	-3.70599e-10	-2.72004e-10	-4.71588e-10	-1.76432e-10	-1.63368e-10	-2.11295e-10	-2.64904e-10	-1.21482e-10	-9.19705e-11	-6.35527e-10	-1.37692e-10	-4.87998e-10
-3.42023e-10	-1.42735e-10	-2.14615e-10	-4.14979e-10	-3.03421e-10	-1.35126e-10	-7.05388e-10	-2.05677e-10	-3.47069e-10	-4.77831e-10	-2.63769e-10	-2.04596e-10	-8.35534e-11	-3.71478e-10	-2.72631e-10	-4.73283e-10	-1.76873e-10	-1.63787e-10	-2.12058e-10	-2.6563e-10	-1.21749e-10	-9.22838e-11	-6.37619e-10	-1.37968e-10	-4.89523e-10
-3.42807e-10	-1.43345e-10	-2.15576e-10	-4.16438e-10	-3.04185e-10	-1.35753e-10	-7.07832e-10	-2.0666e-10	-3.47706e-10	-4.79762e-10	-2.64762e-10	-2.0531e-10	-8.38013e-11	-3.72464e-10	-2.73309e-10	-4.75033e-10	-1.77308e-10	-1.64258e-10	-2.12813e-10	-2.66365e-10	-1.22055e-10	-9.26493e-11	-6.39772e-10	-1.38228e-10	-4.90972e-10
-3.43577e-10	-1.44012e-10	-2.16505e-10	-4.17867e-10	-3.04969e-10	-1.36434e-10	-7.10231e-10	-2.07596e-10	-3.4836e-10	-4.81647e-10	-2.65735e-10	-2.06031e-10	-8.40745e-11	-3.73558e-10	-2.74038e-10	-4.76839e-10	-1.77738e-10	-1.6478e-10	-2.1356e-10	-2.67109e-10	-1.22401e-10	-9.3067e-11	-6.41986e-10	-1.38537e-10	-4.92358e-10
-3.44332e-10	-1.44735e-10	-2.17403e-10	-4.19264e-10	-3.05775e-10	-1.37169e-10	-7.12585e-10	-2.08485e-10	-3.49031e-10	-4.83488e-10	-2.66688e-10	-2.06761e-10	-8.43732e-11	-3.74759e-10	-2.74818e-10	-4.78701e-10	-1.78163e-10	-1.65353e-10	-2.14297e-10	-2.6786e-10	-1.22786e-10	-9.35369e-11	-6.4426e-10	-1.38903e-10	-4.93738e-10
-3.45073e-10	-1.45515e-10	-2.18268e-10	-4.20629e-10	-3.06601e-10	-1.37958e-10	-7.14895e-10	-2.09329e-10	-3.4972e-10	-4.85283e-10	-2.67621e-10	-2.07499e-10	-8.46972e-11	-3.76068e-10	-2.75649e-10	-4.80619e-10	-1.78582e-10	-1.65978e-10	-2.15026e-10	-2.6862e-10	-1.2321e-10	-9.4059e-11	-6.46595e-10	-1.39326e-10	-4.95129e-10
-3.45799e-10	-1.46352e-10	-2.19102e-10	-4.21963e-10	-3.07449e-10	-1.388e-10	-7.17161e-10	-2.10125e-10	-3.50426e-10	-4.87034e-10	-2.68535e-10	-2.08245e-10	-8.50467e-11	-3.77484e-10	-2.76531e-10	-4.82593e-10	-1.78996e-10	-1.66654e-10	-2.15747e-10	-2.69388e-10	-1.23674e-10	-9.46333e-11	-6.48991e-10	-1.39806e-10	-4.96532e-10
-3.46511e-10	-1.47244e-10	-2.19904e-10	-4.23266e-10	-3.08317e-10	-1.39697e-10	-7.19382e-10	-2.10875e-10	-3.5115e-10	-4.8874e-10	-2.69428e-10	-2.09e-10	-8.54215e-11	-3.79007e-10	-2.77464e-10	-4.84624e-10	-1.79405e-10	-1.67382e-10	-2.16459e-10	-2.70166e-10	-1.24177e-10	-9.52596e-11	-6.51448e-10	-1.40344e-10	-4.97946e-10
-3.47209e-10	-1.48194e-10	-2.20674e-10	-4.24537e-10	-3.09207e-10	-1.40648e-10	-7.21558e-10	-2.11579e-10	-3.51891e-10	-4.90401e-10	-2.70302e-10	-2.09762e-10	-8.58216e-11	-3.80701e-10	-2.78453e-10	-4.86729e-10	-1.79825e-10	-1.68165e-10	-2.17157e-10	-2.71113e-10	-1.24639e-10	-9.5991e-11	-6.5367e-10	-1.40937e-10	-4.99377e-10
-3.47896e-10	-1.49204e-10	-2.21412e-10	-4.25777e-10	-3.10117e-10	-1.41654e-10	-7.23698e-10	-2.12235e-10	-3.52651e-10	-4.9202e-10	-2.71156e-10	-2.10533e-10	-8.62687e-11	-3.8388e-10	-2.79642e-10	-4.89481e-10	-1.80845e-10	-1.69101e-10	-2.1778e-10	-2.72779e-10	-1.25295e-10	-9.70963e-11	-6.5635e-10	-1.41544e-10	-5.01025e-10
-3.4877e-10	-1.5048e-10	-2.22131e-10	-4.27026e-10	-3.1108e-10	-1.42785e-10	-7.26138e-10	-2.1282e-10	-3.53601e-10	-4.93765e-10	-2.72047e-10	-2.11311e-10	-8.70383e-11	-3.88573e-10	-2.81321e-10	-4.93237e-10	-1.82935e-10	-1.704e-10	-2.18456e-10	-2.75172e-10	-1.26448e-10	-9.82728e-11	-6.60585e-10	-1.42215e-10	-5.0315e-10
-3.50142e-10	-1.52311e-10	-2.23044e-10	-4.28558e-10	-3.1218e-10	-1.44011e-10	-7.29348e-10	-2.13391e-10	-3.55041e-10	-4.95941e-10	-2.73229e-10	-2.1209e-10	-8.80749e-11	-3.92877e-10	-2.83405e-10	-4.97262e-10	-1.85025e-10	-1.71817e-10	-2.19316e-10	-2.7794e-10	-1.27782e-10	-9.93433e-11	-6.65561e-10	-1.43051e-10	-5.05803e-10
-3.51985e-10	-1.54415e-10	-2.24712e-10	-4.30472e-10	-3.1336e-10	-1.45175e-10	-7.33328e-10	-2.14069e-10	-3.56767e-10	-4.98573e-10	-2.74727e-10	-2.12859e-10	-8.90524e-11	-3.96379e-10	-2.85534e-10	-5.0124e-10	-1.8676e-10	-1.73148e-10	-2.20379e-10	-2.80726e-10	-1.29003e-10	-1.00236e-10	-6.70612e-10	-1.44017e-10	-5.0874e-10
-3.54241e-10	-1.56333e-10	-2.27058e-10	-4.3263e-10	-3.14517e-10	-1.46211e-10	-7.37869e-10	-2.15075e-10	-3.58802e-10	-5.01518e-10	-2.76687e-10	-2.13649e-10	-8.98632e-11	-3.99518e-10	-2.874e-10	-5.05045e-10	-1.88325e-10	-1.7431e-10	-2.21654e-10	-2.83326e-10	-1.30038e-10	-1.00957e-10	-6.75471e-10	-1.45009e-10	-5.11564e-10
-3.56544e-10	-1.58001e-10	-2.29525e-10	-4.34939e-10	-3.15647e-10	-1.47121e-10	-7.42586e-10	-2.16513e-10	-3.61149e-10	-5.04674e-10	-2.79076e-10	-2.14416e-10	-9.05177e-11	-4.02443e-10	-2.89052e-10	-5.0859e-10	-1.89857e-10	-1.75295e-10	-2.23156e-10	-2.85607e-10	-1.30897e-10	-1.01551e-10	-6.79947e-10	-1.45929e-10	-5.14213e-10
-3.5861e-10	-1.59388e-10	-2.31902e-10	-4.37387e-10	-3.16702e-10	-1.47906e-10	-7.47269e-10	-2.18295e-10	-3.63639e-10	-5.07959e-10	-2.81638e-10	-2.15194e-10	-9.10411e-11	-4.04858e-10	-2.90465e-10	-5.1185e-10	-1.91466e-10	-1.76115e-10	-2.24542e-10	-2.87568e-10	-1.31613e-10	-1.02039e-10	-6.84033e-10	-1.46736e-10	-5.16652e-10
-3.60418e-10	-1.6057e-10	-2.34074e-10	-4.39868e-10	-3.17704e-10	-1.48624e-10	-7.51885e-10	-2.20212e-10	-3.6605e-10	-5.11284e-10	-2.84095e-10	-2.15993e-10	-9.14703e-11	-4.0695e-10	-2.9166e-10	-5.14819e-10	-1.93008e-10	-1.7685e-10	-2.25715e-10	-2.89246e-10	-1.3222e-10	-1.02468e-10	-6.87969e-10	-1.47439e-10	-5.18893e-10
-3.61997e-10	-1.61579e-10	-2.36056e-10	-4.42238e-10	-3.18701e-10	-1.49289e-10	-7.56192e-10	-2.22082e-10	-3.68476e-10	-5.1457e-10	-2.86282e-10	-2.16747e-10	-9.1817e-11	-4.08816e-10	-2.92693e-10	-5.17512e-10	-1.94239e-10	-1.7751e-10	-2.26719e-10	-2.90695e-10	-1.32732e-10	-1.0283e-10	-6.91632e-10	-1.4802e-10	-5.20998e-10
-3.63416e-10	-1.62438e-10	-2.37861e-10	-4.44492e-10	-3.19629e-10	-1.49893e-10	-7.60116e-10	-2.23879e-10	-3.70661e-10	-5.17721e-10	-2.88187e-10	-2.17453e-10	-9.21137e-11	-4.10364e-10	-2.93632e-10	-5.19971e-10	-1.95218e-10	-1.78085e-10	-2.27568e-10	-2.91912e-10	-1.33166e-10	-1.03154e-10	-6.95005e-10	-1.48521e-10	-5.22999e-10
-3.64763e-10	-1.63197e-10	-2.39493e-10	-4.46597e-10	-3.2046e-10	-1.50453e-10	-7.63675e-10	-2.25553e-10	-3.72465e-10	-5.20652e-10	-2.89845e-10	-2.18119e-10	-9.23648e-11	-4.11647e-10	-2.94495e-10	-5.22189e-10	-1.96126e-10	-1.78576e-10	-2.28326e-10	-2.92987e-10	-1.33533e-10	-1.0344e-10	-6.98134e-10	-1.48952e-10	-5.24911e-10
-3.65985e-10	-1.6387e-10	-2.40986e-10	-4.48534e-10	-3.21233e-10	-1.50979e-10	-7.66878e-10	-2.27107e-10	-3.73997e-10	-5.23323e-10	-2.91259e-10	-2.18748e-10	-9.25719e-11	-4.12761e-10	-2.95319e-10	-5.24191e-10	-1.96926e-10	-1.78993e-10	-2.29019e-10	-2.93931e-10	-1.33846e-10	-1.03703e-10	-7.01079e-10	-1.49349e-10	-5.26731e-10
-3.67026e-10	-1.64475e-10	-2.4235e-10	-4.50374e-10	-3.21949e-10	-1.51477e-10	-7.69795e-10	-2.28537e-10	-3.75393e-10	-5.25821e-10	-2.92529e-10	-2.1934e-10	-9.27512e-11	-4.13725e-10	-2.96081e-10	-5.26072e-10	-1.97561e-10	-1.79368e-10	-2.29761e-10	-2.94801e-10	-1.34122e-10	-1.03944e-10	-7.03803e-10	-1.49712e-10	-5.28436e-10
-3.67935e-10	-1.65023e-10	-2.43565e-10	-4.52115e-10	-3.22595e-10	-1.51958e-10	-7.72452e-10	-2.29837e-10	-3.767e-10	-5.28136e-10	-2.937e-10	-2.19876e-10	-9.29098e-11	-4.14598e-10	-2.96759e-10	-5.27864e-10	-1.98091e-10	-1.79736e-10	-2.30619e-10	-2.95615e-10	-1.34353e-10	-1.0418e-10	-7.06235e-10	-1.50034e-10	-5.30045e-10
-3.6874e-10	-1.65496e-10	-2.44714e-10	-4.53748e-10	-3.23231e-10	-1.5243e-10	-7.74875e-10	-2.31009e-10	-3.7782e-10	-5.30257e-10	-2.947e-10	-2.20377e-10	-9.30561e-11	-4.15391e-10	-2.97346e-10	-5.29577e-10	-1.98562e-10	-1.80102e-10	-2.31492e-10	-2.96326e-10	-1.34558e-10	-1.04411e-10	-7.08435e-10	-1.50318e-10	-5.31612e-10
-3.69486e-10	-1.6596e-10	-2.45841e-10	-4.55311e-10	-3.23887e-10	-1.5292e-10	-7.77173e-10	-2.32109e-10	-3.78858e-10	-5.32235e-10	-2.9564e-10	-2.20899e-10	-9.3217e-11	-4.16177e-10	-2.97922e-10	-5.3126e-10	-1.99009e-10	-1.80472e-10	-2.32314e-10	-2.96989e-10	-1.34764e-10	-1.04657e-10	-7.10611e-10	-1.50563e-10	-5.33108e-10
-3.70222e-10	-1.66456e-10	-2.46928e-10	-4.56837e-10	-3.24565e-10	-1.53443e-10	-7.79451e-10	-2.33165e-10	-3.79874e-10	-5.34157e-10	-2.96579e-10	-2.21452e-10	-9.34037e-11	-4.17019e-10	-2.98538e-10	-5.32976e-10	-1.99466e-10	-1.80891e-10	-2.33121e-10	-2.97652e-10	-1.35002e-10	-1.04943e-10	-7.12826e-10	-1.50763e-10	-5.34538e-10
-3.70949e-10	-1.66985e-10	-2.47974e-10	-4.58327e-10	-3.25266e-10	-1.53998e-10	-7.81716e-10	-2.34178e-10	-3.80868e-10	-5.36025e-10	-2.97518e-10	-2.22035e-10	-9.36164e-11	-4.1792e-10	-2.99198e-10	-5.34727e-10	-1.99932e-10	-1.81363e-10	-2.33919e-10	-2.98317e-10	-1.35271e-10	-1.05271e-10	-7.15081e-10	-1.50941e-10	-5.35953e-10
-3.71669e-10	-1.67548e-10	-2.48979e-10	-4.59783e-10	-3.25989e-10	-1.54587e-10	-7.83968e-10	-2.35148e-10	-3.8184e-10	-5.37841e-10	-2.98457e-10	-2.22649e-10	-9.38551e-11	-4.1888e-10	-2.999e-10	-5.36513e-10	-2.00407e-10	-1.81886e-10	-2.34707e-10	-2.98985e-10	-1.35572e-10	-1.0564e-10	-7.17376e-10	-1.51119e-10	-5.37336e-10
-3.72379e-10	-1.68145e-10	-2.49943e-10	-4.61204e-10	-3.26735e-10	-1.5521e-10	-7.86205e-10	-2.36075e-10	-3.8279e-10	-5.39604e-10	-2.99396e-10	-2.23294e-10	-9.41197e-11	-4.19898e-10	-3.00645e-10	-5.38335e-10	-2.00891e-10	-1.82462e-10	-2.35485e-10	-2.99656e-10	-1.35905e-10	-1.0605e-10	-7.1971e-10	-1.51359e-10	-5.3867e-10
-3.73082e-10	-1.68776e-10	-2.50867e-10	-4.6259e-10	-3.27503e-10	-1.55866e-10	-7.88429e-10	-2.36958e-10	-3.83718e-10	-5.41314e-10	-3.00335e-10	-2.2397e-10	-9.44103e-11	-4.20976e-10	-3.01433e-10	-5.40191e-10	-2.01385e-10	-1.8309e-10	-2.36253e-10	-3.00329e-10	-1.3627e-10	-1.06502e-10	-7.22084e-10	-1.51668e-10	-5.39993e-10
-3.73777e-10	-1.6944e-10	-2.51749e-10	-4.6394e-10	-3.28295e-10	-1.56555e-10	-7.90639e-10	-2.37798e-10	-3.84625e-10	-5.42971e-10	-3.01274e-10	-2.24676e-10	-9.47268e-11	-4.22112e-10	-3.02263e-10	-5.42083e-10	-2.01888e-10	-1.83771e-10	-2.37011e-10	-3.01004e-10	-1.36666e-10	-1.06995e-10	-7.24498e-10	-1.52047e-10	-5.41321e-10
-3.74463e-10	-1.70138e-10	-2.52591e-10	-4.65256e-10	-3.29109e-10	-1.57277e-10	-7.92836e-10	-2.38595e-10	-3.8551e-10	-5.44575e-10	-3.02214e-10	-2.25414e-10	-9.50693e-11	-4.23308e-10	-3.03137e-10	-5.44011e-10	-2.02399e-10	-1.84503e-10	-2.37759e-10	-3.01682e-10	-1.37094e-10	-1.0753e-10	-7.26951e-10	-1.52495e-10	-5.42653e-10
-3.75141e-10	-1.70869e-10	-2.53393e-10	-4.66537e-10	-3.29945e-10	-1.58033e-10	-7.95019e-10	-2.39349e-10	-3.86373e-10	-5.46126e-10	-3.03153e-10	-2.26182e-10	-9.54378e-11	-4.24562e-10	-3.04053e-10	-5.45973e-10	-2.02921e-10	-1.85288e-10	-2.38498e-10	-3.02363e-10	-1.37554e-10	-1.08106e-10	-7.29444e-10	-1.53013e-10	-5.4399e-10
-3.75811e-10	-1.71634e-10	-2.54153e-10	-4.67782e-10	-3.30805e-10	-1.58822e-10	-7.97188e-10	-2.40059e-10	-3.87214e-10	-5.47624e-10	-3.04093e-10	-2.26981e-10	-9.58328e-11	-4.25913e-10	-3.05012e-10	-5.47983e-10	-2.03463e-10	-1.8613e-10	-2.39221e-10	-3.03199e-10	-1.37965e-10	-1.08771e-10	-7.31712e-10	-1.53601e-10	-5.45333e-10
-3.76475e-10	-1.72437e-10	-2.54873e-10	-4.68993e-10	-3.31686e-10	-1.59649e-10	-7.99346e-10	-2.40726e-10	-3.88031e-10	-5.49071e-10	-3.05034e-10	-2.2781e-10	-9.63267e-11	-4.28496e-10	-3.06055e-10	-5.50415e-10	-2.0444e-10	-1.8719e-10	-2.39861e-10	-3.04812e-10	-1.38466e-10	-1.09801e-10	-7.34373e-10	-1.54238e-10	-5.46795e-10
-3.77251e-10	-1.73513e-10	-2.55583e-10	-4.70209e-10	-3.3259e-10	-1.60647e-10	-8.01657e-10	-2.41332e-10	-3.88769e-10	-5.50566e-10	-3.06074e-10	-2.28652e-10	-9.71867e-11	-4.32668e-10	-3.07465e-10	-5.53543e-10	-2.06318e-10	-1.88577e-10	-2.4051e-10	-3.07086e-10	-1.39459e-10	-1.1088e-10	-7.38294e-10	-1.54924e-10	-5.4866e-10
-3.78366e-10	-1.75191e-10	-2.5644e-10	-4.71588e-10	-3.33551e-10	-1.61822e-10	-8.04609e-10	-2.41889e-10	-3.89443e-10	-5.52276e-10	-3.07353e-10	-2.29529e-10	-9.83699e-11	-4.36594e-10	-3.09077e-10	-5.5699e-10	-2.08338e-10	-1.90046e-10	-2.41279e-10	-3.09722e-10	-1.40682e-10	-1.11889e-10	-7.42924e-10	-1.55694e-10	-5.50938e-10
-3.7993e-10	-1.77128e-10	-2.57806e-10	-4.73212e-10	-3.34535e-10	-1.63023e-10	-8.08415e-10	-2.42538e-10	-3.90123e-10	-5.5424e-10	-3.08838e-10	-2.30403e-10	-9.94911e-11	-4.39866e-10	-3.10715e-10	-5.6042e-10	-2.10092e-10	-1.91323e-10	-2.4216e-10	-3.12367e-10	-1.41774e-10	-1.12778e-10	-7.47735e-10	-1.56502e-10	-5.53485e-10
-3.81872e-10	-1.78846e-10	-2.59709e-10	-4.75094e-10	-3.35556e-10	-1.64134e-10	-8.12852e-10	-2.43528e-10	-3.90794e-10	-5.56467e-10	-3.10682e-10	-2.31214e-10	-1.00429e-10	-4.42631e-10	-3.12219e-10	-5.6365e-10	-2.11773e-10	-1.92385e-10	-2.43231e-10	-3.14793e-10	-1.42756e-10	-1.1355e-10	-7.52272e-10	-1.57299e-10	-5.56067e-10
-3.83879e-10	-1.80305e-10	-2.61806e-10	-4.77122e-10	-3.36541e-10	-1.65109e-10	-8.17523e-10	-2.44963e-10	-3.9142e-10	-5.58906e-10	-3.1285e-10	-2.31926e-10	-1.01152e-10	-4.45022e-10	-3.13505e-10	-5.66659e-10	-2.13324e-10	-1.93311e-10	-2.44492e-10	-3.17002e-10	-1.43585e-10	-1.14214e-10	-7.56518e-10	-1.58055e-10	-5.58518e-10
-3.85706e-10	-1.81549e-10	-2.63876e-10	-4.79256e-10	-3.37424e-10	-1.65989e-10	-8.22157e-10	-2.467e-10	-3.91975e-10	-5.61548e-10	-3.15251e-10	-2.32584e-10	-1.01714e-10	-4.47009e-10	-3.14658e-10	-5.69425e-10	-2.14689e-10	-1.94128e-10	-2.45728e-10	-3.19034e-10	-1.44283e-10	-1.14786e-10	-7.60661e-10	-1.58715e-10	-5.60817e-10
-3.87236e-10	-1.82586e-10	-2.65863e-10	-4.81423e-10	-3.38242e-10	-1.66787e-10	-8.26712e-10	-2.48492e-10	-3.92473e-10	-5.64257e-10	-3.17594e-10	-2.33217e-10	-1.02164e-10	-4.48645e-10	-3.15693e-10	-5.71989e-10	-2.15902e-10	-1.9487e-10	-2.46825e-10	-3.20837e-10	-1.44858e-10	-1.15289e-10	-7.64474e-10	-1.59287e-10	-5.62981e-10
-3.8856e-10	-1.83457e-10	-2.67659e-10	-4.83518e-10	-3.39066e-10	-1.67532e-10	-8.3099e-10	-2.50281e-10	-3.92934e-10	-5.66926e-10	-3.19709e-10	-2.33799e-10	-1.02538e-10	-4.50038e-10	-3.16581e-10	-5.7438e-10	-2.16945e-10	-1.95525e-10	-2.47791e-10	-3.22417e-10	-1.45338e-10	-1.15725e-10	-7.67981e-10	-1.5979e-10	-5.65029e-10
-3.8974e-10	-1.84216e-10	-2.69233e-10	-4.85535e-10	-3.39873e-10	-1.68213e-10	-8.34871e-10	-2.52008e-10	-3.93396e-10	-5.69567e-10	-3.21499e-10	-2.34337e-10	-1.02856e-10	-4.51243e-10	-3.17324e-10	-5.76614e-10	-2.17814e-10	-1.9607e-10	-2.48643e-10	-3.23794e-10	-1.45753e-10	-1.16098e-10	-7.71211e-10	-1.60267e-10	-5.66959e-10
-3.90743e-10	-1.84875e-10	-2.70674e-10	-4.87445e-10	-3.40615e-10	-1.68831e-10	-8.38393e-10	-2.53649e-10	-3.93862e-10	-5.72062e-10	-3.23033e-10	-2.34833e-10	-1.0315e-10	-4.52272e-10	-3.17971e-10	-5.78741e-10	-2.18555e-10	-1.96545e-10	-2.49374e-10	-3.24949e-10	-1.46082e-10	-1.16443e-10	-7.74155e-10	-1.6075e-10	-5.68766e-10
-3.91603e-10	-1.85454e-10	-2.71986e-10	-4.8925e-10	-3.41317e-10	-1.69407e-10	-8.41628e-10	-2.55184e-10	-3.94305e-10	-5.74388e-10	-3.24383e-10	-2.3528e-10	-1.0343e-10	-4.53154e-10	-3.18559e-10	-5.80719e-10	-2.19193e-10	-1.9699e-10	-2.50042e-10	-3.2591e-10	-1.46346e-10	-1.16766e-10	-7.7686e-10	-1.61177e-10	-5.70497e-10
-3.92388e-10	-1.85973e-10	-2.73167e-10	-4.90986e-10	-3.41985e-10	-1.6994e-10	-8.44618e-10	-2.56609e-10	-3.94739e-10	-5.76583e-10	-3.2554e-10	-2.35672e-10	-1.03674e-10	-4.53943e-10	-3.1915e-10	-5.82538e-10	-2.1981e-10	-1.97408e-10	-2.50618e-10	-3.2677e-10	-1.46574e-10	-1.17049e-10	-7.79469e-10	-1.61547e-10	-5.72171e-10
-3.93101e-10	-1.86454e-10	-2.74273e-10	-4.92674e-10	-3.4259e-10	-1.7044e-10	-8.47412e-10	-2.57916e-10	-3.95175e-10	-5.78618e-10	-3.26536e-10	-2.36012e-10	-1.03875e-10	-4.54689e-10	-3.19711e-10	-5.84187e-10	-2.20413e-10	-1.97766e-10	-2.51107e-10	-3.27595e-10	-1.46764e-10	-1.17323e-10	-7.81958e-10	-1.6188e-10	-5.73781e-10
-3.93734e-10	-1.8689e-10	-2.75311e-10	-4.94265e-10	-3.43145e-10	-1.70912e-10	-8.50042e-10	-2.59074e-10	-3.95595e-10	-5.80446e-10	-3.27413e-10	-2.36329e-10	-1.04045e-10	-4.55382e-10	-3.20234e-10	-5.8571e-10	-2.20919e-10	-1.98098e-10	-2.51587e-10	-3.28386e-10	-1.46925e-10	-1.17576e-10	-7.84418e-10	-1.62179e-10	-5.75326e-10
-3.94355e-10	-1.87331e-10	-2.76312e-10	-4.95766e-10	-3.43682e-10	-1.71392e-10	-8.52539e-10	-2.60146e-10	-3.96008e-10	-5.82164e-10	-3.28254e-10	-2.36656e-10	-1.04217e-10	-4.56071e-10	-3.20745e-10	-5.8719e-10	-2.21386e-10	-1.98448e-10	-2.52104e-10	-3.29142e-10	-1.47096e-10	-1.17839e-10	-7.86823e-10	-1.62438e-10	-5.76802e-10
-3.94984e-10	-1.87823e-10	-2.77291e-10	-4.97232e-10	-3.44236e-10	-1.71914e-10	-8.54973e-10	-2.61173e-10	-3.96443e-10	-5.83847e-10	-3.29099e-10	-2.37009e-10	-1.04414e-10	-4.5682e-10	-3.21296e-10	-5.88695e-10	-2.21861e-10	-1.9884e-10	-2.52652e-10	-3.29887e-10	-1.47303e-10	-1.18146e-10	-7.89238e-10	-1.62687e-10	-5.78198e-10
-3.95621e-10	-1.88368e-10	-2.78249e-10	-4.98666e-10	-3.4481e-10	-1.72479e-10	-8.57349e-10	-2.62159e-10	-3.96901e-10	-5.85499e-10	-3.29948e-10	-2.37389e-10	-1.04635e-10	-4.57632e-10	-3.21892e-10	-5.90227e-10	-2.22346e-10	-1.99275e-10	-2.53231e-10	-3.3062e-10	-1.47547e-10	-1.18497e-10	-7.91664e-10	-1.62931e-10	-5.79535e-10
-3.96268e-10	-1.88966e-10	-2.79186e-10	-5.00068e-10	-3.45403e-10	-1.73086e-10	-8.59665e-10	-2.63102e-10	-3.97384e-10	-5.8712e-10	-3.30802e-10	-2.37796e-10	-1.04882e-10	-4.58506e-10	-3.22531e-10	-5.91786e-10	-2.22839e-10	-1.99753e-10	-2.5384e-10	-3.31342e-10	-1.47827e-10	-1.1889e-10	-7.94101e-10	-1.6318e-10	-5.80804e-10
-3.96922e-10	-1.89617e-10	-2.80102e-10	-5.01437e-10	-3.46016e-10	-1.73736e-10	-8.61923e-10	-2.64002e-10	-3.9789e-10	-5.88709e-10	-3.3166e-10	-2.38229e-10	-1.05153e-10	-4.59444e-10	-3.23214e-10	-5.93372e-10	-2.23343e-10	-2.00274e-10	-2.5448e-10	-3.32053e-10	-1.48143e-10	-1.19327e-10	-7.96548e-10	-1.63481e-10	-5.82026e-10
-3.97585e-10	-1.90321e-10	-2.80996e-10	-5.02774e-10	-3.46648e-10	-1.74429e-10	-8.64122e-10	-2.6486e-10	-3.98419e-10	-5.90266e-10	-3.32523e-10	-2.38689e-10	-1.05449e-10	-4.60444e-10	-3.2394e-10	-5.94986e-10	-2.23855e-10	-2.00838e-10	-2.5515e-10	-3.32752e-10	-1.48495e-10	-1.19808e-10	-7.99007e-10	-1.6384e-10	-5.83248e-10
-3.98257e-10	-1.91077e-10	-2.8187e-10	-5.04079e-10	-3.47299e-10	-1.75164e-10	-8.66263e-10	-2.65675e-10	-3.98973e-10	-5.91792e-10	-3.33391e-10	-2.39175e-10	-1.0577e-10	-4.61507e-10	-3.24711e-10	-5.96627e-10	-2.24377e-10	-2.01445e-10	-2.55851e-10	-3.33441e-10	-1.48883e-10	-1.20332e-10	-8.01477e-10	-1.64258e-10	-5.8448e-10
-3.98937e-10	-1.91886e-10	-2.82722e-10	-5.05352e-10	-3.4797e-10	-1.75942e-10	-8.68344e-10	-2.66448e-10	-3.9955e-10	-5.93286e-10	-3.34264e-10	-2.39688e-10	-1.06115e-10	-4.62632e-10	-3.25525e-10	-5.98295e-10	-2.24908e-10	-2.02094e-10	-2.56582e-10	-3.34119e-10	-1.49308e-10	-1.20899e-10	-8.03957e-10	-1.64733e-10	-5.85721e-10
-3.99626e-10	-1.92748e-10	-2.83553e-10	-5.06592e-10	-3.48661e-10	-1.76763e-10	-8.70367e-10	-2.67178e-10	-4.00151e-10	-5.94749e-10	-3.35141e-10	-2.40228e-10	-1.06486e-10	-4.63821e-10	-3.26382e-10	-5.99991e-10	-2.25449e-10	-2.02787e-10	-2.57343e-10	-3.34785e-10	-1.49769e-10	-1.2151e-10	-8.06449e-10	-1.65266e-10	-5.86973e-10
-4.00324e-10	-1.93663e-10	-2.84363e-10	-5.078e-10	-3.49371e-10	-1.77626e-10	-8.7233e-10	-2.67866e-10	-4.00775e-10	-5.9618e-10	-3.36023e-10	-2.40795e-10	-1.06882e-10	-4.6511e-10	-3.27285e-10	-6.01722e-10	-2.26007e-10	-2.03524e-10	-2.58132e-10	-3.35567e-10	-1.50217e-10	-1.22273e-10	-8.08763e-10	-1.65857e-10	-5.88237e-10
-4.01031e-10	-1.94634e-10	-2.85152e-10	-5.08975e-10	-3.50099e-10	-1.78533e-10	-8.74239e-10	-2.6851e-10	-4.01422e-10	-5.9758e-10	-3.3691e-10	-2.41387e-10	-1.0733e-10	-4.67642e-10	-3.28272e-10	-6.0382e-10	-2.26885e-10	-2.04383e-10	-2.58909e-10	-3.36903e-10	-1.50775e-10	-1.23357e-10	-8.11349e-10	-1.66475e-10	-5.8961e-10
-4.01823e-10	-1.95828e-10	-2.85921e-10	-5.1013e-10	-3.50839e-10	-1.79517e-10	-8.76281e-10	-2.69096e-10	-4.02108e-10	-5.9898e-10	-3.37853e-10	-2.41983e-10	-1.07978e-10	-4.71741e-10	-3.29438e-10	-6.06814e-10	-2.28615e-10	-2.05523e-10	-2.59679e-10	-3.38773e-10	-1.51564e-10	-1.24406e-10	-8.14974e-10	-1.67107e-10	-5.91345e-10
-4.02825e-10	-1.97459e-10	-2.86774e-10	-5.11399e-10	-3.51636e-10	-1.80599e-10	-8.78775e-10	-2.69631e-10	-4.03139e-10	-6.00473e-10	-3.38911e-10	-2.42559e-10	-1.09016e-10	-4.75845e-10	-3.30799e-10	-6.1027e-10	-2.30649e-10	-2.0674e-10	-2.60523e-10	-3.41084e-10	-1.52511e-10	-1.25412e-10	-8.19266e-10	-1.67772e-10	-5.93496e-10
-4.04062e-10	-1.99294e-10	-2.88031e-10	-5.12927e-10	-3.52491e-10	-1.81627e-10	-8.81759e-10	-2.70207e-10	-4.04469e-10	-6.02153e-10	-3.40086e-10	-2.43122e-10	-1.10278e-10	-4.79343e-10	-3.32158e-10	-6.13754e-10	-2.32537e-10	-2.07863e-10	-2.61437e-10	-3.43583e-10	-1.53377e-10	-1.26278e-10	-8.23685e-10	-1.68486e-10	-5.95807e-10
-4.05518e-10	-2.01053e-10	-2.8978e-10	-5.14598e-10	-3.53313e-10	-1.82612e-10	-8.85015e-10	-2.71019e-10	-4.05936e-10	-6.03979e-10	-3.41589e-10	-2.4371e-10	-1.11396e-10	-4.82347e-10	-3.33393e-10	-6.17028e-10	-2.34212e-10	-2.08872e-10	-2.62434e-10	-3.46018e-10	-1.54105e-10	-1.27029e-10	-8.27883e-10	-1.69185e-10	-5.98071e-10
-4.07119e-10	-2.02603e-10	-2.91702e-10	-5.16367e-10	-3.54112e-10	-1.8353e-10	-8.88336e-10	-2.72144e-10	-4.0767e-10	-6.05816e-10	-3.43468e-10	-2.44289e-10	-1.12275e-10	-4.85077e-10	-3.34509e-10	-6.20076e-10	-2.35792e-10	-2.09755e-10	-2.63601e-10	-3.48191e-10	-1.54752e-10	-1.27644e-10	-8.31861e-10	-1.69822e-10	-6.00216e-10
-4.08672e-10	-2.03956e-10	-2.93608e-10	-5.18265e-10	-3.54844e-10	-1.84354e-10	-8.91683e-10	-2.73612e-10	-4.09702e-10	-6.07625e-10	-3.45412e-10	-2.44847e-10	-1.12978e-10	-4.87386e-10	-3.35526e-10	-6.22927e-10	-2.37325e-10	-2.10528e-10	-2.6473e-10	-3.50067e-10	-1.55306e-10	-1.28183e-10	-8.35583e-10	-1.70408e-10	-6.02263e-10
-4.10076e-10	-2.05112e-10	-2.95389e-10	-5.20225e-10	-3.55524e-10	-1.85109e-10	-8.94927e-10	-2.75311e-10	-4.11775e-10	-6.09414e-10	-3.47369e-10	-2.45357e-10	-1.13528e-10	-4.89371e-10	-3.36422e-10	-6.25547e-10	-2.38753e-10	-2.11201e-10	-2.65746e-10	-3.51659e-10	-1.55761e-10	-1.28668e-10	-8.38957e-10	-1.70948e-10	-6.04207e-10
-4.11257e-10	-2.06075e-10	-2.97035e-10	-5.22134e-10	-3.562e-10	-1.85814e-10	-8.98017e-10	-2.77152e-10	-4.13779e-10	-6.11158e-10	-3.49214e-10	-2.4583e-10	-1.1399e-10	-4.91149e-10	-3.37255e-10	-6.27955e-10	-2.39937e-10	-2.11769e-10	-2.66661e-10	-3.53027e-10	-1.56159e-10	-1.29084e-10	-8.42156e-10	-1.71453e-10	-6.06026e-10
-4.12256e-10	-2.0697e-10	-2.98538e-10	-5.23924e-10	-3.56878e-10	-1.86459e-10	-9.00924e-10	-2.78969e-10	-4.15735e-10	-6.12845e-10	-3.50847e-10	-2.46279e-10	-1.14363e-10	-4.92641e-10	-3.38027e-10	-6.30166e-10	-2.40874e-10	-2.12255e-10	-2.67497e-10	-3.54217e-10	-1.56511e-10	-1.29469e-10	-8.45203e-10	-1.71911e-10	-6.07719e-10
-4.1313e-10	-2.07824e-10	-2.99886e-10	-5.25589e-10	-3.57529e-10	-1.87042e-10	-9.03633e-10	-2.80628e-10	-4.17496e-10	-6.14441e-10	-3.5228e-10	-2.46724e-10	-1.14701e-10	-4.93868e-10	-3.38741e-10	-6.32171e-10	-2.41614e-10	-2.12694e-10	-2.68242e-10	-3.5528e-10	-1.56808e-10	-1.29817e-10	-8.48004e-10	-1.72316e-10	-6.09339e-10
-4.1391e-10	-2.08578e-10	-3.01125e-10	-5.27143e-10	-3.58167e-10	-1.87574e-10	-9.06164e-10	-2.82135e-10	-4.19011e-10	-6.15987e-10	-3.53567e-10	-2.47167e-10	-1.15031e-10	-4.94963e-10	-3.39437e-10	-6.33999e-10	-2.42266e-10	-2.13083e-10	-2.68971e-10	-3.56257e-10	-1.57082e-10	-1.3013e-10	-8.50621e-10	-1.72705e-10	-6.10902e-10
-4.14643e-10	-2.09243e-10	-3.02243e-10	-5.28579e-10	-3.58783e-10	-1.88072e-10	-9.0854e-10	-2.83497e-10	-4.20325e-10	-6.1749e-10	-3.54722e-10	-2.47594e-10	-1.15322e-10	-4.95895e-10	-3.40082e-10	-6.3568e-10	-2.42863e-10	-2.13441e-10	-2.69619e-10	-3.57166e-10	-1.57327e-10	-1.30416e-10	-8.53167e-10	-1.73055e-10	-6.12401e-10
-4.15303e-10	-2.09835e-10	-3.03275e-10	-5.29918e-10	-3.59352e-10	-1.88547e-10	-9.10766e-10	-2.8475e-10	-4.21628e-10	-6.18941e-10	-3.55767e-10	-2.47989e-10	-1.15585e-10	-4.96678e-10	-3.40646e-10	-6.37238e-10	-2.43398e-10	-2.1377e-10	-2.70211e-10	-3.5801e-10	-1.57535e-10	-1.30698e-10	-8.55613e-10	-1.73374e-10	-6.13853e-10
-4.15923e-10	-2.10369e-10	-3.04265e-10	-5.31192e-10	-3.59882e-10	-1.89022e-10	-9.12857e-10	-2.85901e-10	-4.23003e-10	-6.20351e-10	-3.56692e-10	-2.48351e-10	-1.15846e-10	-4.97401e-10	-3.41153e-10	-6.38658e-10	-2.43888e-10	-2.14088e-10	-2.70725e-10	-3.58806e-10	-1.57727e-10	-1.30966e-10	-8.57856e-10	-1.73688e-10	-6.15267e-10
-4.16522e-10	-2.10903e-10	-3.05218e-10	-5.32428e-10	-3.60404e-10	-1.89522e-10	-9.14901e-10	-2.86971e-10	-4.24281e-10	-6.21731e-10	-3.57576e-10	-2.48718e-10	-1.16111e-10	-4.98144e-10	-3.41656e-10	-6.40043e-10	-2.44358e-10	-2.14438e-10	-2.71226e-10	-3.59563e-10	-1.57928e-10	-1.31233e-10	-8.59999e-10	-1.74007e-10	-6.16638e-10
-4.17126e-10	-2.11471e-10	-3.06147e-10	-5.33648e-10	-3.60953e-10	-1.90059e-10	-9.1691e-10	-2.88003e-10	-4.25514e-10	-6.23106e-10	-3.58471e-10	-2.49116e-10	-1.16388e-10	-4.98956e-10	-3.42198e-10	-6.41473e-10	-2.44831e-10	-2.14833e-10	-2.71751e-10	-3.60315e-10	-1.58164e-10	-1.31538e-10	-8.62163e-10	-1.74331e-10	-6.17979e-10
-4.17738e-10	-2.12076e-10	-3.07053e-10	-5.34851e-10	-3.6153e-10	-1.90634e-10	-9.18885e-10	-2.88998e-10	-4.26706e-10	-6.24475e-10	-3.59378e-10	-2.49546e-10	-1.16676e-10	-4.9984e-10	-3.42781e-10	-6.42952e-10	-2.45308e-10	-2.15273e-10	-2.72301e-10	-3.61061e-10	-1.58436e-10	-1.3188e-10	-8.6435e-10	-1.74619e-10	-6.19278e-10
-4.18355e-10	-2.12717e-10	-3.07937e-10	-5.36039e-10	-3.62135e-10	-1.91249e-10	-9.20826e-10	-2.89957e-10	-4.27858e-10	-6.2584e-10	-3.60298e-10	-2.50009e-10	-1.16975e-10	-5.00796e-10	-3.43407e-10	-6.44479e-10	-2.4579e-10	-2.1576e-10	-2.72877e-10	-3.61804e-10	-1.58744e-10	-1.3226e-10	-8.6656e-10	-1.74918e-10	-6.20522e-10
-4.1898e-10	-2.13395e-10	-3.08797e-10	-5.37211e-10	-3.62769e-10	-1.91901e-10	-9.22732e-10	-2.90879e-10	-4.28968e-10	-6.27201e-10	-3.61231e-10	-2.50504e-10	-1.17286e-10	-5.01824e-10	-3.44073e-10	-6.46054e-10	-2.46276e-10	-2.16292e-10	-2.73479e-10	-3.62542e-10	-1.59087e-10	-1.32677e-10	-8.68793e-10	-1.7526e-10	-6.21727e-10
-4.19611e-10	-2.14109e-10	-3.09636e-10	-5.38367e-10	-3.63432e-10	-1.92592e-10	-9.24605e-10	-2.91764e-10	-4.30038e-10	-6.28557e-10	-3.62176e-10	-2.51031e-10	-1.17608e-10	-5.02925e-10	-3.44781e-10	-6.47677e-10	-2.46767e-10	-2.16869e-10	-2.74106e-10	-3.63275e-10	-1.59466e-10	-1.33131e-10	-8.71049e-10	-1.75646e-10	-6.22936e-10
-4.2025e-10	-2.14859e-10	-3.10451e-10	-5.39507e-10	-3.64123e-10	-1.93322e-10	-9.26443e-10	-2.92613e-10	-4.31067e-10	-6.29908e-10	-3.63135e-10	-2.5159e-10	-1.17942e-10	-5.04097e-10	-3.45531e-10	-6.49348e-10	-2.47263e-10	-2.17493e-10	-2.74759e-10	-3.64004e-10	-1.59882e-10	-1.33622e-10	-8.73328e-10	-1.76077e-10	-6.24162e-10
-4.20895e-10	-2.15646e-10	-3.11244e-10	-5.40631e-10	-3.64842e-10	-1.9409e-10	-9.28247e-10	-2.93426e-10	-4.32055e-10	-6.31255e-10	-3.64106e-10	-2.52181e-10	-1.18288e-10	-5.05342e-10	-3.46322e-10	-6.51067e-10	-2.47762e-10	-2.18162e-10	-2.75437e-10	-3.64729e-10	-1.60333e-10	-1.34151e-10	-8.7563e-10	-1.76554e-10	-6.25406e-10
-4.21546e-10	-2.16469e-10	-3.12014e-10	-5.41739e-10	-3.6559e-10	-1.94897e-10	-9.30016e-10	-2.94202e-10	-4.33002e-10	-6.32597e-10	-3.65089e-10	-2.52805e-10	-1.18645e-10	-5.06659e-10	-3.47154e-10	-6.52835e-10	-2.48267e-10	-2.18876e-10	-2.76141e-10	-3.65449e-10	-1.6082e-10	-1.34717e-10	-8.77954e-10	-1.77075e-10	-6.26667e-10
-4.22205e-10	-2.17328e-10	-3.12762e-10	-5.42832e-10	-3.66366e-10	-1.95743e-10	-9.31752e-10	-2.94941e-10	-4.33908e-10	-6.33935e-10	-3.66086e-10	-2.53461e-10	-1.19013e-10	-5.08078e-10	-3.48027e-10	-6.54661e-10	-2.48784e-10	-2.19637e-10	-2.76868e-10	-3.66259e-10	-1.61298e-10	-1.35401e-10	-8.80113e-10	-1.77641e-10	-6.27947e-10
-4.2287e-10	-2.18227e-10	-3.13487e-10	-5.43908e-10	-3.67171e-10	-1.96628e-10	-9.33456e-10	-2.95644e-10	-4.34772e-10	-6.35268e-10	-3.67094e-10	-2.54148e-10	-1.19403e-10	-5.10535e-10	-3.48952e-10	-6.56867e-10	-2.49658e-10	-2.20461e-10	-2.7754e-10	-3.67624e-10	-1.6191e-10	-1.36422e-10	-8.82299e-10	-1.7821e-10	-6.29288e-10
-4.23564e-10	-2.19394e-10	-3.14186e-10	-5.44943e-10	-3.67974e-10	-1.9761e-10	-9.35305e-10	-2.96288e-10	-4.35528e-10	-6.366e-10	-3.68082e-10	-2.54856e-10	-1.19887e-10	-5.14479e-10	-3.50018e-10	-6.59657e-10	-2.51415e-10	-2.21398e-10	-2.78149e-10	-3.69583e-10	-1.62787e-10	-1.37484e-10	-8.85245e-10	-1.78798e-10	-6.30829e-10
-4.24367e-10	-2.21128e-10	-3.14934e-10	-5.46009e-10	-3.68761e-10	-1.98707e-10	-9.37544e-10	-2.96881e-10	-4.36118e-10	-6.38018e-10	-3.69086e-10	-2.55569e-10	-1.20509e-10	-5.18395e-10	-3.51282e-10	-6.62643e-10	-2.53341e-10	-2.22374e-10	-2.78767e-10	-3.71824e-10	-1.63717e-10	-1.38461e-10	-8.8884e-10	-1.79391e-10	-6.32682e-10
-4.25457e-10	-2.23049e-10	-3.16064e-10	-5.47266e-10	-3.69524e-10	-1.99786e-10	-9.40216e-10	-2.97512e-10	-4.36656e-10	-6.39642e-10	-3.70182e-10	-2.56258e-10	-1.21239e-10	-5.21754e-10	-3.52552e-10	-6.65587e-10	-2.54945e-10	-2.23257e-10	-2.79497e-10	-3.74056e-10	-1.64588e-10	-1.39327e-10	-8.9259e-10	-1.7999e-10	-6.34776e-10
-4.2681e-10	-2.2477e-10	-3.177e-10	-5.48737e-10	-3.70268e-10	-2.00776e-10	-9.43182e-10	-2.98285e-10	-4.37178e-10	-6.41388e-10	-3.71212e-10	-2.56864e-10	-1.21934e-10	-5.24584e-10	-3.53689e-10	-6.68415e-10	-2.56264e-10	-2.24032e-10	-2.80356e-10	-3.76179e-10	-1.65341e-10	-1.40058e-10	-8.96281e-10	-1.806e-10	-6.36892e-10
-4.28193e-10	-2.26236e-10	-3.19569e-10	-5.50397e-10	-3.70966e-10	-2.01717e-10	-9.46412e-10	-2.99336e-10	-4.37657e-10	-6.43289e-10	-3.72205e-10	-2.57394e-10	-1.22537e-10	-5.26901e-10	-3.54732e-10	-6.71142e-10	-2.57558e-10	-2.24747e-10	-2.81354e-10	-3.78212e-10	-1.6602e-10	-1.4067e-10	-8.99903e-10	-1.81193e-10	-6.38911e-10
-4.29489e-10	-2.27473e-10	-3.21421e-10	-5.52163e-10	-3.71593e-10	-2.02575e-10	-9.49722e-10	-3.0067e-10	-4.38112e-10	-6.45246e-10	-3.73128e-10	-2.57885e-10	-1.23038e-10	-5.28844e-10	-3.55698e-10	-6.73641e-10	-2.58943e-10	-2.25387e-10	-2.82298e-10	-3.8007e-10	-1.66643e-10	-1.4121e-10	-9.03375e-10	-1.81738e-10	-6.40775e-10
-4.30692e-10	-2.28515e-10	-3.23158e-10	-5.53977e-10	-3.72199e-10	-2.03338e-10	-9.5303e-10	-3.02307e-10	-4.38506e-10	-6.47248e-10	-3.73969e-10	-2.58347e-10	-1.23469e-10	-5.3053e-10	-3.56579e-10	-6.75939e-10	-2.60113e-10	-2.25968e-10	-2.83176e-10	-3.81749e-10	-1.67165e-10	-1.41659e-10	-9.06724e-10	-1.82239e-10	-6.42506e-10
-4.31777e-10	-2.29438e-10	-3.2482e-10	-5.55722e-10	-3.72822e-10	-2.04038e-10	-9.56227e-10	-3.04071e-10	-4.38884e-10	-6.49312e-10	-3.7476e-10	-2.58794e-10	-1.23829e-10	-5.31978e-10	-3.57394e-10	-6.78024e-10	-2.61111e-10	-2.26491e-10	-2.84004e-10	-3.83262e-10	-1.67605e-10	-1.4203e-10	-9.09843e-10	-1.82676e-10	-6.44139e-10
-4.32748e-10	-2.30237e-10	-3.26379e-10	-5.57382e-10	-3.73454e-10	-2.04685e-10	-9.59157e-10	-3.05852e-10	-4.393e-10	-6.51366e-10	-3.75487e-10	-2.59248e-10	-1.24135e-10	-5.33199e-10	-3.58129e-10	-6.7995e-10	-2.61928e-10	-2.26942e-10	-2.84738e-10	-3.84582e-10	-1.67996e-10	-1.42354e-10	-9.12721e-10	-1.83062e-10	-6.45694e-10
-4.33656e-10	-2.30907e-10	-3.27844e-10	-5.58969e-10	-3.74057e-10	-2.05296e-10	-9.61825e-10	-3.07498e-10	-4.39723e-10	-6.53333e-10	-3.7615e-10	-2.59708e-10	-1.244e-10	-5.34296e-10	-3.5886e-10	-6.81718e-10	-2.62594e-10	-2.27329e-10	-2.8542e-10	-3.85738e-10	-1.68322e-10	-1.42631e-10	-9.15442e-10	-1.83413e-10	-6.47186e-10
-4.34501e-10	-2.31495e-10	-3.2923e-10	-5.60463e-10	-3.74597e-10	-2.05861e-10	-9.64285e-10	-3.09042e-10	-4.40128e-10	-6.55287e-10	-3.76749e-10	-2.60185e-10	-1.24661e-10	-5.35273e-10	-3.59508e-10	-6.83314e-10	-2.63182e-10	-2.27686e-10	-2.86048e-10	-3.86759e-10	-1.68593e-10	-1.42898e-10	-9.18023e-10	-1.83735e-10	-6.48619e-10
-4.3525e-10	-2.3205e-10	-3.30471e-10	-5.61878e-10	-3.75096e-10	-2.06409e-10	-9.66582e-10	-3.10492e-10	-4.40541e-10	-6.57162e-10	-3.77329e-10	-2.60685e-10	-1.24923e-10	-5.36109e-10	-3.60107e-10	-6.84869e-10	-2.63706e-10	-2.28009e-10	-2.86667e-10	-3.87724e-10	-1.68822e-10	-1.43143e-10	-9.20376e-10	-1.84025e-10	-6.50017e-10
-4.35899e-10	-2.3257e-10	-3.3161e-10	-5.6322e-10	-3.7558e-10	-2.06972e-10	-9.68759e-10	-3.11784e-10	-4.40932e-10	-6.58972e-10	-3.77911e-10	-2.6118e-10	-1.25177e-10	-5.36841e-10	-3.60699e-10	-6.86329e-10	-2.64135e-10	-2.28306e-10	-2.87314e-10	-3.88631e-10	-1.69022e-10	-1.4337e-10	-9.22541e-10	-1.84286e-10	-6.51385e-10
-4.36507e-10	-2.33037e-10	-3.32735e-10	-5.64492e-10	-3.76055e-10	-2.07528e-10	-9.7081e-10	-3.12967e-10	-4.41305e-10	-6.60699e-10	-3.78493e-10	-2.61635e-10	-1.25426e-10	-5.37532e-10	-3.61257e-10	-6.87678e-10	-2.64541e-10	-2.286e-10	-2.87937e-10	-3.89493e-10	-1.6922e-10	-1.43604e-10	-9.24575e-10	-1.8454e-10	-6.52711e-10
-4.3711e-10	-2.33499e-10	-3.33867e-10	-5.65742e-10	-3.76566e-10	-2.08073e-10	-9.7278e-10	-3.14112e-10	-4.41687e-10	-6.62381e-10	-3.79058e-10	-2.62094e-10	-1.25682e-10	-5.3825e-10	-3.61805e-10	-6.89007e-10	-2.64977e-10	-2.28922e-10	-2.88542e-10	-3.90325e-10	-1.6943e-10	-1.43874e-10	-9.26543e-10	-1.84786e-10	-6.5399e-10
-4.37719e-10	-2.33996e-10	-3.34973e-10	-5.66974e-10	-3.77103e-10	-2.08637e-10	-9.74722e-10	-3.15224e-10	-4.42094e-10	-6.64033e-10	-3.79623e-10	-2.62578e-10	-1.25962e-10	-5.39042e-10	-3.62372e-10	-6.90381e-10	-2.65412e-10	-2.29289e-10	-2.89161e-10	-3.91145e-10	-1.69672e-10	-1.44191e-10	-9.28554e-10	-1.85049e-10	-6.55218e-10
-4.38336e-10	-2.34532e-10	-3.3605e-10	-5.68188e-10	-3.77667e-10	-2.09224e-10	-9.76638e-10	-3.16304e-10	-4.42528e-10	-6.65655e-10	-3.80189e-10	-2.63088e-10	-1.26266e-10	-5.39911e-10	-3.62961e-10	-6.91806e-10	-2.65848e-10	-2.29703e-10	-2.89795e-10	-3.91954e-10	-1.69945e-10	-1.44556e-10	-9.30611e-10	-1.85315e-10	-6.56394e-10
-4.38961e-10	-2.35106e-10	-3.37099e-10	-5.69383e-10	-3.78256e-10	-2.09832e-10	-9.78529e-10	-3.1735e-10	-4.42989e-10	-6.67248e-10	-3.80757e-10	-2.63622e-10	-1.26592e-10	-5.40858e-10	-3.63571e-10	-6.93281e-10	-2.66285e-10	-2.30163e-10	-2.90444e-10	-3.92751e-10	-1.7025e-10	-1.44968e-10	-9.32713e-10	-1.85565e-10	-6.57538e-10
-4.39594e-10	-2.35717e-10	-3.38119e-10	-5.70561e-10	-3.78872e-10	-2.10462e-10	-9.80394e-10	-3.18363e-10	-4.43476e-10	-6.68812e-10	-3.81326e-10	-2.64181e-10	-1.26943e-10	-5.41881e-10	-3.64203e-10	-6.94806e-10	-2.66721e-10	-2.3067e-10	-2.91108e-10	-3.93536e-10	-1.70586e-10	-1.45428e-10	-9.34861e-10	-1.85856e-10	-6.58689e-10
-4.40234e-10	-2.36367e-10	-3.39111e-10	-5.7172e-10	-3.79512e-10	-2.11114e-10	-9.82234e-10	-3.19342e-10	-4.4399e-10	-6.70346e-10	-3.81896e-10	-2.64766e-10	-1.27316e-10	-5.42981e-10	-3.64856e-10	-6.96382e-10	-2.67158e-10	-2.31223e-10	-2.91788e-10	-3.9431e-10	-1.70954e-10	-1.45936e-10	-9.37053e-10	-1.86196e-10	-6.5985e-10
-4.40882e-10	-2.37055e-10	-3.40075e-10	-5.7286e-10	-3.80179e-10	-2.11788e-10	-9.84049e-10	-3.20289e-10	-4.4453e-10	-6.7185e-10	-3.82468e-10	-2.65376e-10	-1.27713e-10	-5.44158e-10	-3.65531e-10	-6.98008e-10	-2.67594e-10	-2.31822e-10	-2.92483e-10	-3.95072e-10	-1.71354e-10	-1.4649e-10	-9.39291e-10	-1.86586e-10	-6.61027e-10
-4.41537e-10	-2.37781e-10	-3.41009e-10	-5.73983e-10	-3.80871e-10	-2.12483e-10	-9.85838e-10	-3.21202e-10	-4.45097e-10	-6.73326e-10	-3.83041e-10	-2.6601e-10	-1.28133e-10	-5.45412e-10	-3.66228e-10	-6.99684e-10	-2.68031e-10	-2.32468e-10	-2.93193e-10	-3.95822e-10	-1.71785e-10	-1.47093e-10	-9.41575e-10	-1.87025e-10	-6.62219e-10
-4.422e-10	-2.38544e-10	-3.41916e-10	-5.75087e-10	-3.81589e-10	-2.13201e-10	-9.87602e-10	-3.22082e-10	-4.4569e-10	-6.74771e-10	-3.83615e-10	-2.6667e-10	-1.28576e-10	-5.46742e-10	-3.66946e-10	-7.01411e-10	-2.68468e-10	-2.33161e-10	-2.93919e-10	-3.96561e-10	-1.72248e-10	-1.47743e-10	-9.43903e-10	-1.87514e-10	-6.63426e-10
-4.42871e-10	-2.39346e-10	-3.42794e-10	-5.76173e-10	-3.82333e-10	-2.1394e-10	-9.89341e-10	-3.22929e-10	-4.46311e-10	-6.76188e-10	-3.8419e-10	-2.67355e-10	-1.29044e-10	-5.48172e-10	-3.67685e-10	-7.0319e-10	-2.68912e-10	-2.339e-10	-2.94658e-10	-3.97353e-10	-1.72685e-10	-1.48506e-10	-9.46161e-10	-1.88052e-10	-6.6465e-10
-4.43549e-10	-2.40189e-10	-3.43643e-10	-5.7724e-10	-3.83102e-10	-2.14703e-10	-9.91056e-10	-3.23742e-10	-4.46957e-10	-6.77575e-10	-3.84768e-10	-2.68065e-10	-1.29568e-10	-5.50576e-10	-3.68483e-10	-7.05161e-10	-2.69711e-10	-2.34683e-10	-2.95347e-10	-3.98602e-10	-1.73249e-10	-1.49534e-10	-9.48585e-10	-1.88584e-10	-6.65931e-10
-4.4423e-10	-2.41238e-10	-3.44459e-10	-5.78267e-10	-3.83868e-10	-2.15541e-10	-9.92849e-10	-3.24508e-10	-4.47675e-10	-6.78943e-10	-3.85396e-10	-2.68791e-10	-1.30235e-10	-5.54416e-10	-3.69412e-10	-7.07606e-10	-2.71334e-10	-2.35627e-10	-2.9594e-10	-4.00425e-10	-1.74093e-10	-1.50571e-10	-9.51525e-10	-1.89081e-10	-6.67375e-10
-4.44983e-10	-2.42774e-10	-3.45276e-10	-5.79336e-10	-3.84603e-10	-2.16493e-10	-9.94986e-10	-3.25205e-10	-4.48729e-10	-6.80272e-10	-3.86204e-10	-2.69498e-10	-1.31087e-10	-5.58112e-10	-3.70418e-10	-7.10322e-10	-2.73151e-10	-2.36684e-10	-2.96509e-10	-4.02608e-10	-1.74988e-10	-1.51532e-10	-9.54873e-10	-1.89625e-10	-6.69097e-10
-4.45932e-10	-2.44539e-10	-3.46371e-10	-5.80542e-10	-3.85307e-10	-2.17462e-10	-9.97468e-10	-3.25976e-10	-4.49995e-10	-6.81598e-10	-3.87287e-10	-2.70152e-10	-1.32015e-10	-5.61333e-10	-3.7142e-10	-7.12981e-10	-2.74743e-10	-2.3765e-10	-2.97097e-10	-4.0484e-10	-1.75791e-10	-1.52373e-10	-9.58426e-10	-1.90199e-10	-6.71004e-10
-4.4709e-10	-2.46151e-10	-3.47888e-10	-5.81869e-10	-3.86001e-10	-2.18371e-10	-1.00019e-09	-3.26941e-10	-4.51294e-10	-6.82929e-10	-3.88813e-10	-2.70767e-10	-1.32789e-10	-5.64218e-10	-3.7239e-10	-7.1551e-10	-2.76079e-10	-2.38503e-10	-2.9781e-10	-4.06956e-10	-1.76541e-10	-1.53063e-10	-9.61807e-10	-1.90748e-10	-6.72963e-10
-4.48285e-10	-2.47593e-10	-3.4962e-10	-5.83301e-10	-3.86688e-10	-2.19198e-10	-1.00304e-09	-3.28124e-10	-4.52776e-10	-6.8424e-10	-3.90757e-10	-2.71347e-10	-1.33394e-10	-5.66883e-10	-3.73311e-10	-7.17952e-10	-2.77256e-10	-2.39273e-10	-2.98643e-10	-4.08874e-10	-1.77188e-10	-1.53638e-10	-9.64934e-10	-1.91273e-10	-6.74876e-10
-4.49401e-10	-2.4885e-10	-3.51297e-10	-5.84891e-10	-3.87309e-10	-2.19943e-10	-1.00607e-09	-3.29554e-10	-4.54526e-10	-6.85571e-10	-3.92798e-10	-2.71919e-10	-1.33886e-10	-5.69207e-10	-3.74171e-10	-7.20253e-10	-2.78483e-10	-2.39997e-10	-2.99464e-10	-4.10557e-10	-1.77717e-10	-1.54139e-10	-9.67906e-10	-1.9174e-10	-6.76705e-10
-4.50496e-10	-2.4991e-10	-3.52816e-10	-5.86527e-10	-3.87872e-10	-2.20635e-10	-1.00918e-09	-3.31172e-10	-4.56306e-10	-6.87059e-10	-3.94738e-10	-2.72477e-10	-1.34342e-10	-5.71155e-10	-3.74926e-10	-7.22388e-10	-2.79651e-10	-2.40656e-10	-3.00293e-10	-4.12e-10	-1.78193e-10	-1.54567e-10	-9.70723e-10	-1.92147e-10	-6.78486e-10
-4.51556e-10	-2.50797e-10	-3.54234e-10	-5.88152e-10	-3.88432e-10	-2.2126e-10	-1.01221e-09	-3.32903e-10	-4.58076e-10	-6.88677e-10	-3.9653e-10	-2.73012e-10	-1.34743e-10	-5.72885e-10	-3.75657e-10	-7.24395e-10	-2.80656e-10	-2.41252e-10	-3.01039e-10	-4.1324e-10	-1.78653e-10	-1.54965e-10	-9.73355e-10	-1.92519e-10	-6.80188e-10
-4.52511e-10	-2.51594e-10	-3.55619e-10	-5.89768e-10	-3.88979e-10	-2.21838e-10	-1.01506e-09	-3.34687e-10	-4.59712e-10	-6.90411e-10	-3.98125e-10	-2.73516e-10	-1.35098e-10	-5.74389e-10	-3.76358e-10	-7.26291e-10	-2.81511e-10	-2.41782e-10	-3.01696e-10	-4.14383e-10	-1.79036e-10	-1.55359e-10	-9.75783e-10	-1.92873e-10	-6.81784e-10
-4.53348e-10	-2.52317e-10	-3.5694e-10	-5.91354e-10	-3.89467e-10	-2.22399e-10	-1.01772e-09	-3.36471e-10	-4.61115e-10	-6.9216e-10	-3.99523e-10	-2.73991e-10	-1.3542e-10	-5.75649e-10	-3.77066e-10	-7.28077e-10	-2.82206e-10	-2.42237e-10	-3.02301e-10	-4.15467e-10	-1.79358e-10	-1.55731e-10	-9.78077e-10	-1.93205e-10	-6.83263e-10
-4.54098e-10	-2.52967e-10	-3.58209e-10	-5.92843e-10	-3.89909e-10	-2.2292e-10	-1.02019e-09	-3.38108e-10	-4.62313e-10	-6.93843e-10	-4.00777e-10	-2.74544e-10	-1.3573e-10	-5.76718e-10	-3.77706e-10	-7.2975e-10	-2.82817e-10	-2.42676e-10	-3.02866e-10	-4.16502e-10	-1.79636e-10	-1.56076e-10	-9.80226e-10	-1.93498e-10	-6.84661e-10
-4.54775e-10	-2.53583e-10	-3.5942e-10	-5.94206e-10	-3.90339e-10	-2.23393e-10	-1.0225e-09	-3.39583e-10	-4.63366e-10	-6.95449e-10	-4.01862e-10	-2.75127e-10	-1.3603e-10	-5.77654e-10	-3.78252e-10	-7.31309e-10	-2.83392e-10	-2.43083e-10	-3.03399e-10	-4.17519e-10	-1.79881e-10	-1.56392e-10	-9.82197e-10	-1.93763e-10	-6.86033e-10
-4.55427e-10	-2.5419e-10	-3.60585e-10	-5.95482e-10	-3.90799e-10	-2.2385e-10	-1.02469e-09	-3.40877e-10	-4.64309e-10	-6.9701e-10	-4.02818e-10	-2.7567e-10	-1.36305e-10	-5.7848e-10	-3.78752e-10	-7.3275e-10	-2.83916e-10	-2.43463e-10	-3.03875e-10	-4.18478e-10	-1.80122e-10	-1.56667e-10	-9.8409e-10	-1.94035e-10	-6.87385e-10
-4.56094e-10	-2.54785e-10	-3.61713e-10	-5.96745e-10	-3.91299e-10	-2.24313e-10	-1.02678e-09	-3.42038e-10	-4.65169e-10	-6.98577e-10	-4.03728e-10	-2.76156e-10	-1.36558e-10	-5.79188e-10	-3.79196e-10	-7.34139e-10	-2.84398e-10	-2.43815e-10	-3.04299e-10	-4.19431e-10	-1.8034e-10	-1.56912e-10	-9.85995e-10	-1.94293e-10	-6.88693e-10
-4.56747e-10	-2.55402e-10	-3.6279e-10	-5.98002e-10	-3.91835e-10	-2.24788e-10	-1.02879e-09	-3.43146e-10	-4.65998e-10	-7.00121e-10	-4.0458e-10	-2.76637e-10	-1.36797e-10	-5.79892e-10	-3.79641e-10	-7.35544e-10	-2.84831e-10	-2.44156e-10	-3.04716e-10	-4.20393e-10	-1.80557e-10	-1.57179e-10	-9.87888e-10	-1.94538e-10	-6.89971e-10
-4.57401e-10	-2.5606e-10	-3.63841e-10	-5.9925e-10	-3.92397e-10	-2.25308e-10	-1.03079e-09	-3.44217e-10	-4.66817e-10	-7.01674e-10	-4.0542e-10	-2.77129e-10	-1.37057e-10	-5.80665e-10	-3.80129e-10	-7.36961e-10	-2.85258e-10	-2.44543e-10	-3.05162e-10	-4.21343e-10	-1.80805e-10	-1.57486e-10	-9.89843e-10	-1.94768e-10	-6.91207e-10
-4.58058e-10	-2.56757e-10	-3.64867e-10	-6.00489e-10	-3.92982e-10	-2.25876e-10	-1.03275e-09	-3.45252e-10	-4.67626e-10	-7.03238e-10	-4.06251e-10	-2.77635e-10	-1.37338e-10	-5.81509e-10	-3.80663e-10	-7.38392e-10	-2.85682e-10	-2.44979e-10	-3.05636e-10	-4.22281e-10	-1.81084e-10	-1.57834e-10	-9.91864e-10	-1.94995e-10	-6.92425e-10
-4.58717e-10	-2.57495e-10	-3.65869e-10	-6.01718e-10	-3.93591e-10	-2.26492e-10	-1.0347e-09	-3.46249e-10	-4.68427e-10	-7.04812e-10	-4.07074e-10	-2.78153e-10	-1.37642e-10	-5.82425e-10	-3.81243e-10	-7.39835e-10	-2.86104e-10	-2.45463e-10	-3.0614e-10	-4.23206e-10	-1.81394e-10	-1.58223e-10	-9.9395e-10	-1.95233e-10	-6.93636e-10
-4.59378e-10	-2.58273e-10	-3.66846e-10	-6.02938e-10	-3.94224e-10	-2.27155e-10	-1.03663e-09	-3.4721e-10	-4.69217e-10	-7.06399e-10	-4.07887e-10	-2.78685e-10	-1.37967e-10	-5.83413e-10	-3.81869e-10	-7.4129e-10	-2.86522e-10	-2.45995e-10	-3.06673e-10	-4.2412e-10	-1.81737e-10	-1.58653e-10	-9.96101e-10	-1.95518e-10	-6.9487e-10
-4.60041e-10	-2.59092e-10	-3.67799e-10	-6.04148e-10	-3.94882e-10	-2.27865e-10	-1.03853e-09	-3.48134e-10	-4.69999e-10	-7.07995e-10	-4.08692e-10	-2.79229e-10	-1.38315e-10	-5.84472e-10	-3.8254e-10	-7.42757e-10	-2.86937e-10	-2.46576e-10	-3.07234e-10	-4.25022e-10	-1.8211e-10	-1.59125e-10	-9.98317e-10	-1.95856e-10	-6.96108e-10
-4.60706e-10	-2.59951e-10	-3.68727e-10	-6.05349e-10	-3.95563e-10	-2.28623e-10	-1.04041e-09	-3.49021e-10	-4.7077e-10	-7.09604e-10	-4.09488e-10	-2.79786e-10	-1.38684e-10	-5.85603e-10	-3.83258e-10	-7.44237e-10	-2.87349e-10	-2.47205e-10	-3.07825e-10	-4.25912e-10	-1.82515e-10	-1.59637e-10	-1.0006e-09	-1.96246e-10	-6.97346e-10
-4.61374e-10	-2.6085e-10	-3.69631e-10	-6.06541e-10	-3.96268e-10	-2.29428e-10	-1.04227e-09	-3.49871e-10	-4.71533e-10	-7.11223e-10	-4.10276e-10	-2.80356e-10	-1.39075e-10	-5.86806e-10	-3.84021e-10	-7.4573e-10	-2.87758e-10	-2.47883e-10	-3.08445e-10	-4.2679e-10	-1.82952e-10	-1.60189e-10	-1.00294e-09	-1.96689e-10	-6.98582e-10
-4.62044e-10	-2.61789e-10	-3.7051e-10	-6.07724e-10	-3.96997e-10	-2.30281e-10	-1.04411e-09	-3.50685e-10	-4.72286e-10	-7.12853e-10	-4.11054e-10	-2.80939e-10	-1.39489e-10	-5.88081e-10	-3.8483e-10	-7.47235e-10	-2.88164e-10	-2.48609e-10	-3.09094e-10	-4.27656e-10	-1.8342e-10	-1.60783e-10	-1.00536e-09	-1.97185e-10	-6.99817e-10
-4.62716e-10	-2.62769e-10	-3.71365e-10	-6.08897e-10	-3.97751e-10	-2.31181e-10	-1.04592e-09	-3.51461e-10	-4.73029e-10	-7.14495e-10	-4.11824e-10	-2.81535e-10	-1.39924e-10	-5.89443e-10	-3.85686e-10	-7.48755e-10	-2.8857e-10	-2.49382e-10	-3.0977e-10	-4.28581e-10	-1.83859e-10	-1.61494e-10	-1.00769e-09	-1.97733e-10	-7.01054e-10
-4.6339e-10	-2.6379e-10	-3.72195e-10	-6.10061e-10	-3.98528e-10	-2.3213e-10	-1.04771e-09	-3.52201e-10	-4.73762e-10	-7.16147e-10	-4.12586e-10	-2.82143e-10	-1.40409e-10	-5.91573e-10	-3.86623e-10	-7.50426e-10	-2.8921e-10	-2.50205e-10	-3.10401e-10	-4.299e-10	-1.84249e-10	-1.62461e-10	-1.01012e-09	-1.98267e-10	-7.02358e-10
-4.64078e-10	-2.64905e-10	-3.73022e-10	-6.11182e-10	-3.99312e-10	-2.33161e-10	-1.04957e-09	-3.52886e-10	-4.74405e-10	-7.17771e-10	-4.13375e-10	-2.82744e-10	-1.41006e-10	-5.94876e-10	-3.87648e-10	-7.52415e-10	-2.90624e-10	-2.51119e-10	-3.10961e-10	-4.31702e-10	-1.84744e-10	-1.63379e-10	-1.01318e-09	-1.9871e-10	-7.03851e-10
-4.64807e-10	-2.6635e-10	-3.73914e-10	-6.12292e-10	-4.0008e-10	-2.34225e-10	-1.05171e-09	-3.53523e-10	-4.74904e-10	-7.19305e-10	-4.14223e-10	-2.83283e-10	-1.41733e-10	-5.9818e-10	-3.88684e-10	-7.54645e-10	-2.92349e-10	-2.52061e-10	-3.11523e-10	-4.33813e-10	-1.85387e-10	-1.64203e-10	-1.01671e-09	-1.99124e-10	-7.05562e-10
-4.65588e-10	-2.68074e-10	-3.74965e-10	-6.13508e-10	-4.00798e-10	-2.35244e-10	-1.05406e-09	-3.54181e-10	-4.7536e-10	-7.20789e-10	-4.15098e-10	-2.83766e-10	-1.42449e-10	-6.01075e-10	-3.89657e-10	-7.56878e-10	-2.93902e-10	-2.52939e-10	-3.12108e-10	-4.35908e-10	-1.86036e-10	-1.64909e-10	-1.02032e-09	-1.99567e-10	-7.07421e-10
-4.66533e-10	-2.69653e-10	-3.76358e-10	-6.14766e-10	-4.01489e-10	-2.36214e-10	-1.05656e-09	-3.54936e-10	-4.75792e-10	-7.22311e-10	-4.15985e-10	-2.84248e-10	-1.43134e-10	-6.03529e-10	-3.90599e-10	-7.58982e-10	-2.95324e-10	-2.53754e-10	-3.12746e-10	-4.37895e-10	-1.86606e-10	-1.65518e-10	-1.02378e-09	-2.00047e-10	-7.0934e-10
-4.67532e-10	-2.71032e-10	-3.77911e-10	-6.16142e-10	-4.02161e-10	-2.371e-10	-1.0593e-09	-3.55924e-10	-4.76207e-10	-7.23878e-10	-4.16893e-10	-2.84722e-10	-1.43699e-10	-6.05753e-10	-3.91455e-10	-7.61008e-10	-2.96678e-10	-2.54515e-10	-3.13491e-10	-4.398e-10	-1.8709e-10	-1.66063e-10	-1.02711e-09	-2.00532e-10	-7.11325e-10
-4.68512e-10	-2.72179e-10	-3.79449e-10	-6.17601e-10	-4.02782e-10	-2.37909e-10	-1.06212e-09	-3.5723e-10	-4.76606e-10	-7.25364e-10	-4.17785e-10	-2.85176e-10	-1.44133e-10	-6.07798e-10	-3.92173e-10	-7.62941e-10	-2.97964e-10	-2.55189e-10	-3.14273e-10	-4.4156e-10	-1.87488e-10	-1.66532e-10	-1.03028e-09	-2.01006e-10	-7.13274e-10
-4.69444e-10	-2.73184e-10	-3.80941e-10	-6.19127e-10	-4.0343e-10	-2.38667e-10	-1.0649e-09	-3.58798e-10	-4.77004e-10	-7.26757e-10	-4.18646e-10	-2.85614e-10	-1.44528e-10	-6.09554e-10	-3.92798e-10	-7.6483e-10	-2.99063e-10	-2.55781e-10	-3.15018e-10	-4.43078e-10	-1.87844e-10	-1.66946e-10	-1.03318e-09	-2.01444e-10	-7.15101e-10
-4.70344e-10	-2.74064e-10	-3.82348e-10	-6.20708e-10	-4.04424e-10	-2.39377e-10	-1.06768e-09	-3.60474e-10	-4.7742e-10	-7.28125e-10	-4.19463e-10	-2.86032e-10	-1.44919e-10	-6.11071e-10	-3.93377e-10	-7.66606e-10	-3.00047e-10	-2.56335e-10	-3.15778e-10	-4.44457e-10	-1.88151e-10	-1.67308e-10	-1.03588e-09	-2.01849e-10	-7.16814e-10
-4.71198e-10	-2.74815e-10	-3.83697e-10	-6.22252e-10	-4.05695e-10	-2.40025e-10	-1.07032e-09	-3.62123e-10	-4.77823e-10	-7.29496e-10	-4.20197e-10	-2.86423e-10	-1.45276e-10	-6.12446e-10	-3.93922e-10	-7.68245e-10	-3.00927e-10	-2.56878e-10	-3.16564e-10	-4.45706e-10	-1.88402e-10	-1.67635e-10	-1.03845e-09	-2.02213e-10	-7.1842e-10
-4.71978e-10	-2.75513e-10	-3.85014e-10	-6.23764e-10	-4.06931e-10	-2.40621e-10	-1.0728e-09	-3.6367e-10	-4.7818e-10	-7.30835e-10	-4.20875e-10	-2.86815e-10	-1.4557e-10	-6.13708e-10	-3.94435e-10	-7.69815e-10	-3.01618e-10	-2.57373e-10	-3.17275e-10	-4.46908e-10	-1.88618e-10	-1.67923e-10	-1.04087e-09	-2.02535e-10	-7.19883e-10
-4.72712e-10	-2.76159e-10	-3.86236e-10	-6.25239e-10	-4.08037e-10	-2.41171e-10	-1.07512e-09	-3.6511e-10	-4.78536e-10	-7.32128e-10	-4.21531e-10	-2.87213e-10	-1.45816e-10	-6.14802e-10	-3.94933e-10	-7.71322e-10	-3.02215e-10	-2.5782e-10	-3.17904e-10	-4.48084e-10	-1.88867e-10	-1.68209e-10	-1.04313e-09	-2.02838e-10	-7.21261e-10
-4.73375e-10	-2.76742e-10	-3.87331e-10	-6.26654e-10	-4.09007e-10	-2.41699e-10	-1.07731e-09	-3.66436e-10	-4.7891e-10	-7.33454e-10	-4.22158e-10	-2.87586e-10	-1.4607e-10	-6.15762e-10	-3.9541e-10	-7.72762e-10	-3.0278e-10	-2.58213e-10	-3.18489e-10	-4.49145e-10	-1.89137e-10	-1.68479e-10	-1.04522e-09	-2.03136e-10	-7.22597e-10
-4.73942e-10	-2.77273e-10	-3.88343e-10	-6.28013e-10	-4.09871e-10	-2.42199e-10	-1.07937e-09	-3.67643e-10	-4.79264e-10	-7.34819e-10	-4.22742e-10	-2.8797e-10	-1.46355e-10	-6.16635e-10	-3.95934e-10	-7.74192e-10	-3.03334e-10	-2.58547e-10	-3.19043e-10	-4.5012e-10	-1.89379e-10	-1.68732e-10	-1.04717e-09	-2.03403e-10	-7.2388e-10
-4.74484e-10	-2.77768e-10	-3.89309e-10	-6.29303e-10	-4.10656e-10	-2.42674e-10	-1.08131e-09	-3.68767e-10	-4.79572e-10	-7.36168e-10	-4.23312e-10	-2.88332e-10	-1.46637e-10	-6.17452e-10	-3.96461e-10	-7.75588e-10	-3.03856e-10	-2.5886e-10	-3.19526e-10	-4.51012e-10	-1.89599e-10	-1.68958e-10	-1.04912e-09	-2.03637e-10	-7.25146e-10
-4.75054e-10	-2.78244e-10	-3.90259e-10	-6.30569e-10	-4.11417e-10	-2.43149e-10	-1.08315e-09	-3.69847e-10	-4.79888e-10	-7.37485e-10	-4.23867e-10	-2.88712e-10	-1.46944e-10	-6.18285e-10	-3.9702e-10	-7.76973e-10	-3.04369e-10	-2.59192e-10	-3.1998e-10	-4.51835e-10	-1.89827e-10	-1.69192e-10	-1.05107e-09	-2.03853e-10	-7.26384e-10
-4.75636e-10	-2.78742e-10	-3.91198e-10	-6.31817e-10	-4.12179e-10	-2.43647e-10	-1.08496e-09	-3.70894e-10	-4.80242e-10	-7.38822e-10	-4.24428e-10	-2.89127e-10	-1.47267e-10	-6.19164e-10	-3.97607e-10	-7.78377e-10	-3.04881e-10	-2.59565e-10	-3.20465e-10	-4.5266e-10	-1.90084e-10	-1.6947e-10	-1.05308e-09	-2.04083e-10	-7.27607e-10
-4.7623e-10	-2.79264e-10	-3.92126e-10	-6.33045e-10	-4.12943e-10	-2.44168e-10	-1.08675e-09	-3.71907e-10	-4.80635e-10	-7.40179e-10	-4.24995e-10	-2.89578e-10	-1.47605e-10	-6.20093e-10	-3.98221e-10	-7.798e-10	-3.05393e-10	-2.59981e-10	-3.20982e-10	-4.53491e-10	-1.90371e-10	-1.69791e-10	-1.05514e-09	-2.04313e-10	-7.28775e-10
-4.76836e-10	-2.7981e-10	-3.93043e-10	-6.34253e-10	-4.13707e-10	-2.44714e-10	-1.08851e-09	-3.72886e-10	-4.81066e-10	-7.41559e-10	-4.2557e-10	-2.90065e-10	-1.47958e-10	-6.21072e-10	-3.98862e-10	-7.81243e-10	-3.05904e-10	-2.6044e-10	-3.21533e-10	-4.54328e-10	-1.90687e-10	-1.70156e-10	-1.05725e-09	-2.04569e-10	-7.29871e-10
-4.77452e-10	-2.8038e-10	-3.93948e-10	-6.35443e-10	-4.14473e-10	-2.45283e-10	-1.09025e-09	-3.73831e-10	-4.81537e-10	-7.4296e-10	-4.26152e-10	-2.90587e-10	-1.48326e-10	-6.221e-10	-3.99531e-10	-7.82705e-10	-3.06416e-10	-2.60941e-10	-3.22116e-10	-4.5517e-10	-1.91032e-10	-1.70565e-10	-1.05941e-09	-2.04871e-10	-7.30931e-10
-4.7808e-10	-2.80974e-10	-3.94843e-10	-6.36613e-10	-4.15241e-10	-2.45876e-10	-1.09196e-09	-3.74742e-10	-4.82046e-10	-7.44382e-10	-4.26742e-10	-2.91146e-10	-1.48708e-10	-6.23177e-10	-4.00227e-10	-7.84187e-10	-3.06928e-10	-2.61485e-10	-3.22733e-10	-4.56017e-10	-1.91407e-10	-1.71017e-10	-1.06163e-09	-2.05222e-10	-7.3201e-10
-4.7872e-10	-2.81593e-10	-3.95726e-10	-6.37763e-10	-4.16009e-10	-2.46494e-10	-1.09364e-09	-3.75619e-10	-4.82594e-10	-7.45825e-10	-4.27338e-10	-2.9174e-10	-1.49106e-10	-6.24304e-10	-4.0095e-10	-7.85688e-10	-3.0744e-10	-2.62071e-10	-3.23382e-10	-4.5687e-10	-1.91812e-10	-1.71513e-10	-1.06389e-09	-2.05624e-10	-7.33112e-10
-4.7937e-10	-2.82235e-10	-3.96597e-10	-6.38895e-10	-4.16779e-10	-2.47135e-10	-1.0953e-09	-3.76463e-10	-4.8318e-10	-7.47291e-10	-4.27942e-10	-2.9237e-10	-1.49518e-10	-6.2548e-10	-4.017e-10	-7.8721e-10	-3.07951e-10	-2.62701e-10	-3.24064e-10	-4.57728e-10	-1.92245e-10	-1.72054e-10	-1.06621e-09	-2.06075e-10	-7.34237e-10
-4.80032e-10	-2.82902e-10	-3.97458e-10	-6.40007e-10	-4.17551e-10	-2.478e-10	-1.09693e-09	-3.77273e-10	-4.83805e-10	-7.48777e-10	-4.28553e-10	-2.93035e-10	-1.49945e-10	-6.26705e-10	-4.02478e-10	-7.8875e-10	-3.08462e-10	-2.63372e-10	-3.24779e-10	-4.58592e-10	-1.92708e-10	-1.72638e-10	-1.06858e-09	-2.06577e-10	-7.35384e-10
-4.80706e-10	-2.83593e-10	-3.98307e-10	-6.411e-10	-4.18324e-10	-2.48488e-10	-1.09853e-09	-3.78049e-10	-4.8447e-10	-7.50285e-10	-4.29172e-10	-2.93737e-10	-1.50388e-10	-6.27994e-10	-4.03283e-10	-7.9031e-10	-3.08977e-10	-2.64086e-10	-3.25524e-10	-4.59521e-10	-1.93141e-10	-1.73303e-10	-1.07087e-09	-2.07128e-10	-7.36554e-10
-4.81391e-10	-2.84309e-10	-3.99145e-10	-6.42173e-10	-4.19097e-10	-2.49202e-10	-1.10011e-09	-3.78791e-10	-4.85172e-10	-7.51814e-10	-4.29797e-10	-2.94474e-10	-1.50829e-10	-6.30028e-10	-4.04062e-10	-7.91949e-10	-3.09725e-10	-2.64823e-10	-3.26225e-10	-4.60822e-10	-1.93521e-10	-1.74171e-10	-1.07307e-09	-2.07701e-10	-7.37731e-10
-4.82101e-10	-2.8514e-10	-3.99971e-10	-6.43221e-10	-4.19839e-10	-2.49981e-10	-1.10172e-09	-3.79486e-10	-4.85845e-10	-7.53333e-10	-4.30438e-10	-2.95212e-10	-1.51298e-10	-6.33258e-10	-4.04773e-10	-7.93863e-10	-3.11094e-10	-2.65612e-10	-3.26902e-10	-4.62586e-10	-1.94087e-10	-1.75013e-10	-1.07567e-09	-2.08229e-10	-7.38984e-10
-4.82882e-10	-2.86331e-10	-4.00795e-10	-6.443e-10	-4.20485e-10	-2.5086e-10	-1.10345e-09	-3.80133e-10	-4.86399e-10	-7.54794e-10	-4.31181e-10	-2.95884e-10	-1.51931e-10	-6.364e-10	-4.05501e-10	-7.96014e-10	-3.12633e-10	-2.66418e-10	-3.27579e-10	-4.64657e-10	-1.94685e-10	-1.758e-10	-1.07859e-09	-2.08713e-10	-7.40486e-10
-4.83763e-10	-2.87769e-10	-4.01589e-10	-6.45455e-10	-4.21058e-10	-2.51741e-10	-1.10549e-09	-3.80872e-10	-4.86844e-10	-7.56192e-10	-4.3221e-10	-2.96486e-10	-1.52634e-10	-6.39091e-10	-4.06292e-10	-7.98204e-10	-3.13972e-10	-2.67185e-10	-3.2823e-10	-4.66836e-10	-1.95228e-10	-1.76499e-10	-1.08157e-09	-2.09168e-10	-7.42172e-10
-4.84809e-10	-2.89138e-10	-4.02331e-10	-6.4667e-10	-4.21621e-10	-2.52552e-10	-1.10775e-09	-3.81784e-10	-4.87207e-10	-7.57544e-10	-4.33807e-10	-2.97047e-10	-1.53264e-10	-6.41448e-10	-4.07092e-10	-8.00339e-10	-3.15156e-10	-2.67876e-10	-3.28911e-10	-4.68898e-10	-1.95766e-10	-1.77102e-10	-1.08444e-09	-2.09611e-10	-7.43914e-10
-4.85875e-10	-2.9036e-10	-4.03003e-10	-6.47974e-10	-4.22161e-10	-2.53287e-10	-1.11034e-09	-3.82962e-10	-4.87532e-10	-7.58905e-10	-4.35831e-10	-2.97582e-10	-1.53799e-10	-6.43514e-10	-4.07882e-10	-8.02419e-10	-3.16383e-10	-2.68491e-10	-3.29643e-10	-4.70767e-10	-1.96257e-10	-1.77638e-10	-1.08726e-09	-2.10034e-10	-7.45599e-10
-4.86871e-10	-2.91417e-10	-4.03593e-10	-6.49328e-10	-4.22711e-10	-2.53989e-10	-1.11309e-09	-3.84392e-10	-4.87879e-10	-7.60245e-10	-4.37846e-10	-2.9808e-10	-1.54251e-10	-6.45338e-10	-4.08564e-10	-8.04389e-10	-3.17723e-10	-2.69064e-10	-3.30427e-10	-4.72479e-10	-1.967e-10	-1.78103e-10	-1.09001e-09	-2.104e-10	-7.4725e-10
-4.8781e-10	-2.92346e-10	-4.04158e-10	-6.50701e-10	-4.23272e-10	-2.54656e-10	-1.1158e-09	-3.85939e-10	-4.88193e-10	-7.61565e-10	-4.39654e-10	-2.98526e-10	-1.54629e-10	-6.46925e-10	-4.09139e-10	-8.06258e-10	-3.1906e-10	-2.69587e-10	-3.31172e-10	-4.74061e-10	-1.97048e-10	-1.78525e-10	-1.09258e-09	-2.10729e-10	-7.48821e-10
-4.88705e-10	-2.93182e-10	-4.0471e-10	-6.52074e-10	-4.23831e-10	-2.55263e-10	-1.11844e-09	-3.87535e-10	-4.88469e-10	-7.62867e-10	-4.41217e-10	-2.98926e-10	-1.54986e-10	-6.48328e-10	-4.09698e-10	-8.08052e-10	-3.20152e-10	-2.70089e-10	-3.31911e-10	-4.75506e-10	-1.97333e-10	-1.78905e-10	-1.09507e-09	-2.11032e-10	-7.5035e-10
-4.89542e-10	-2.93934e-10	-4.05196e-10	-6.53474e-10	-4.24343e-10	-2.55823e-10	-1.12091e-09	-3.8907e-10	-4.88754e-10	-7.64099e-10	-4.42593e-10	-2.9931e-10	-1.55302e-10	-6.4953e-10	-4.10249e-10	-8.09745e-10	-3.21002e-10	-2.70544e-10	-3.32621e-10	-4.76843e-10	-1.97586e-10	-1.79256e-10	-1.0974e-09	-2.11296e-10	-7.5179e-10
-4.90316e-10	-2.94634e-10	-4.05636e-10	-6.54855e-10	-4.24825e-10	-2.56356e-10	-1.12325e-09	-3.90502e-10	-4.8905e-10	-7.65263e-10	-4.43838e-10	-2.99682e-10	-1.55575e-10	-6.50545e-10	-4.10791e-10	-8.11345e-10	-3.21672e-10	-2.70971e-10	-3.33319e-10	-4.78067e-10	-1.97795e-10	-1.79597e-10	-1.09973e-09	-2.11534e-10	-7.5314e-10
-4.91094e-10	-2.95322e-10	-4.06047e-10	-6.56225e-10	-4.25289e-10	-2.56852e-10	-1.12539e-09	-3.91858e-10	-4.8941e-10	-7.66376e-10	-4.44928e-10	-3.00039e-10	-1.55848e-10	-6.51432e-10	-4.11299e-10	-8.12959e-10	-3.22275e-10	-2.71371e-10	-3.33897e-10	-4.79221e-10	-1.98005e-10	-1.79931e-10	-1.102e-09	-2.11786e-10	-7.54413e-10
-4.91931e-10	-2.95968e-10	-4.06423e-10	-6.57578e-10	-4.25719e-10	-2.57305e-10	-1.12741e-09	-3.9314e-10	-4.89783e-10	-7.675e-10	-4.45924e-10	-3.00341e-10	-1.561e-10	-6.52232e-10	-4.11797e-10	-8.14554e-10	-3.22914e-10	-2.7173e-10	-3.34465e-10	-4.80304e-10	-1.98222e-10	-1.80239e-10	-1.10407e-09	-2.12048e-10	-7.5565e-10
-4.92733e-10	-2.96552e-10	-4.06795e-10	-6.58892e-10	-4.2613e-10	-2.57715e-10	-1.12936e-09	-3.94361e-10	-4.90128e-10	-7.68682e-10	-4.46871e-10	-3.00606e-10	-1.56353e-10	-6.52964e-10	-4.12257e-10	-8.16081e-10	-3.23473e-10	-2.72082e-10	-3.3505e-10	-4.81315e-10	-1.9844e-10	-1.80506e-10	-1.10603e-09	-2.1231e-10	-7.56899e-10
-4.93474e-10	-2.97092e-10	-4.07173e-10	-6.60092e-10	-4.26558e-10	-2.58085e-10	-1.13124e-09	-3.955e-10	-4.90491e-10	-7.69933e-10	-4.47742e-10	-3.00857e-10	-1.56627e-10	-6.53635e-10	-4.12689e-10	-8.17526e-10	-3.23935e-10	-2.72428e-10	-3.35577e-10	-4.82252e-10	-1.9864e-10	-1.80756e-10	-1.10799e-09	-2.12571e-10	-7.58187e-10
-4.94213e-10	-2.9762e-10	-4.07553e-10	-6.61226e-10	-4.27008e-10	-2.58452e-10	-1.13306e-09	-3.96569e-10	-4.90876e-10	-7.71253e-10	-4.48562e-10	-3.01124e-10	-1.569e-10	-6.54323e-10	-4.13138e-10	-8.18959e-10	-3.2437e-10	-2.72771e-10	-3.36075e-10	-4.83189e-10	-1.98866e-10	-1.81023e-10	-1.11003e-09	-2.12819e-10	-7.59465e-10
-4.94953e-10	-2.9818e-10	-4.07963e-10	-6.62363e-10	-4.2748e-10	-2.58849e-10	-1.13485e-09	-3.97596e-10	-4.9129e-10	-7.72578e-10	-4.49375e-10	-3.01416e-10	-1.57187e-10	-6.55082e-10	-4.13632e-10	-8.20407e-10	-3.24808e-10	-2.73149e-10	-3.36589e-10	-4.84132e-10	-1.99126e-10	-1.81327e-10	-1.1121e-09	-2.13075e-10	-7.60689e-10
-4.95694e-10	-2.98776e-10	-4.08403e-10	-6.63505e-10	-4.27977e-10	-2.59278e-10	-1.1366e-09	-3.98583e-10	-4.91735e-10	-7.73903e-10	-4.50185e-10	-3.01734e-10	-1.57487e-10	-6.55917e-10	-4.14173e-10	-8.2187e-10	-3.25253e-10	-2.73562e-10	-3.3712e-10	-4.85079e-10	-1.99421e-10	-1.81669e-10	-1.11421e-09	-2.1331e-10	-7.61843e-10
-4.96436e-10	-2.99409e-10	-4.08875e-10	-6.64654e-10	-4.28497e-10	-2.5974e-10	-1.13832e-09	-3.99528e-10	-4.9221e-10	-7.75229e-10	-4.50992e-10	-3.02078e-10	-1.578e-10	-6.56826e-10	-4.14759e-10	-8.23348e-10	-3.25704e-10	-2.74009e-10	-3.37669e-10	-4.8603e-10	-1.99749e-10	-1.8205e-10	-1.11636e-09	-2.13547e-10	-7.62947e-10
-4.97179e-10	-3.00077e-10	-4.09378e-10	-6.65807e-10	-4.2904e-10	-2.60233e-10	-1.14001e-09	-4.00432e-10	-4.92716e-10	-7.76556e-10	-4.51794e-10	-3.02448e-10	-1.58127e-10	-6.57809e-10	-4.15392e-10	-8.24841e-10	-3.26161e-10	-2.74492e-10	-3.38236e-10	-4.86986e-10	-2.00112e-10	-1.82468e-10	-1.11854e-09	-2.13831e-10	-7.64025e-10
-4.97923e-10	-3.00781e-10	-4.09913e-10	-6.66967e-10	-4.29607e-10	-2.60759e-10	-1.14167e-09	-4.01296e-10	-4.93252e-10	-7.77884e-10	-4.52593e-10	-3.02844e-10	-1.58467e-10	-6.58867e-10	-4.16072e-10	-8.2635e-10	-3.26624e-10	-2.7501e-10	-3.38821e-10	-4.87946e-10	-2.0051e-10	-1.82925e-10	-1.12076e-09	-2.1416e-10	-7.65124e-10
-4.98668e-10	-3.01521e-10	-4.10478e-10	-6.68132e-10	-4.30198e-10	-2.61317e-10	-1.14329e-09	-4.02118e-10	-4.93819e-10	-7.79212e-10	-4.53388e-10	-3.03267e-10	-1.58821e-10	-6.59999e-10	-4.16798e-10	-8.27873e-10	-3.27093e-10	-2.75563e-10	-3.39424e-10	-4.8891e-10	-2.00941e-10	-1.83419e-10	-1.12302e-09	-2.14536e-10	-7.66259e-10
-4.99414e-10	-3.02298e-10	-4.11076e-10	-6.69303e-10	-4.30812e-10	-2.61907e-10	-1.14488e-09	-4.02899e-10	-4.94415e-10	-7.80542e-10	-4.54179e-10	-3.03715e-10	-1.59189e-10	-6.61207e-10	-4.1757e-10	-8.29412e-10	-3.27569e-10	-2.76151e-10	-3.40044e-10	-4.89878e-10	-2.01407e-10	-1.83952e-10	-1.12531e-09	-2.14957e-10	-7.67429e-10
-5.00161e-10	-3.0311e-10	-4.11704e-10	-6.7048e-10	-4.3145e-10	-2.6253e-10	-1.14644e-09	-4.0364e-10	-4.95042e-10	-7.81872e-10	-4.54966e-10	-3.0419e-10	-1.5957e-10	-6.62488e-10	-4.18388e-10	-8.30966e-10	-3.2805e-10	-2.76775e-10	-3.40682e-10	-4.90851e-10	-2.01907e-10	-1.84522e-10	-1.12764e-09	-2.15425e-10	-7.68633e-10
-5.00908e-10	-3.03959e-10	-4.12364e-10	-6.71662e-10	-4.32111e-10	-2.63184e-10	-1.14796e-09	-4.0434e-10	-4.957e-10	-7.83202e-10	-4.5575e-10	-3.0469e-10	-1.59964e-10	-6.63854e-10	-4.19253e-10	-8.32537e-10	-3.2854e-10	-2.77433e-10	-3.41336e-10	-4.9191e-10	-2.02388e-10	-1.85184e-10	-1.12993e-09	-2.15938e-10	-7.69871e-10
-5.01657e-10	-3.04844e-10	-4.13055e-10	-6.7285e-10	-4.32796e-10	-2.63871e-10	-1.14945e-09	-4.04998e-10	-4.96388e-10	-7.84534e-10	-4.5653e-10	-3.05217e-10	-1.60391e-10	-6.65849e-10	-4.20127e-10	-8.34179e-10	-3.29191e-10	-2.78138e-10	-3.41947e-10	-4.93359e-10	-2.02853e-10	-1.86064e-10	-1.13216e-09	-2.16445e-10	-7.7112e-10
-5.02425e-10	-3.05829e-10	-4.13775e-10	-6.74026e-10	-4.33467e-10	-2.64622e-10	-1.15102e-09	-4.05601e-10	-4.97148e-10	-7.85845e-10	-4.57305e-10	-3.05763e-10	-1.60897e-10	-6.68908e-10	-4.21018e-10	-8.35989e-10	-3.30396e-10	-2.78972e-10	-3.42523e-10	-4.95099e-10	-2.03407e-10	-1.86947e-10	-1.1346e-09	-2.16876e-10	-7.72476e-10
-5.03229e-10	-3.0712e-10	-4.14513e-10	-6.75196e-10	-4.34082e-10	-2.65458e-10	-1.15286e-09	-4.06162e-10	-4.98183e-10	-7.8709e-10	-4.58099e-10	-3.06289e-10	-1.61421e-10	-6.72071e-10	-4.21901e-10	-8.37988e-10	-3.31804e-10	-2.79807e-10	-3.43072e-10	-4.97073e-10	-2.03884e-10	-1.87729e-10	-1.13731e-09	-2.17277e-10	-7.74018e-10
-5.04099e-10	-3.08563e-10	-4.15399e-10	-6.76419e-10	-4.34634e-10	-2.66282e-10	-1.15488e-09	-4.06778e-10	-4.99423e-10	-7.88305e-10	-4.58927e-10	-3.06776e-10	-1.61964e-10	-6.74845e-10	-4.22703e-10	-8.40035e-10	-3.3305e-10	-2.80594e-10	-3.43621e-10	-4.99124e-10	-2.04281e-10	-1.88432e-10	-1.14023e-09	-2.17655e-10	-7.75704e-10
-5.05053e-10	-3.09948e-10	-4.16523e-10	-6.77673e-10	-4.35126e-10	-2.67056e-10	-1.1572e-09	-4.0754e-10	-5.00711e-10	-7.89593e-10	-4.59731e-10	-3.07255e-10	-1.62512e-10	-6.7729e-10	-4.23423e-10	-8.42007e-10	-3.34291e-10	-2.81294e-10	-3.44184e-10	-5.01132e-10	-2.04597e-10	-1.89049e-10	-1.14299e-09	-2.18048e-10	-7.77432e-10
-5.05982e-10	-3.11173e-10	-4.17746e-10	-6.79011e-10	-4.35561e-10	-2.6781e-10	-1.1599e-09	-4.08523e-10	-5.0209e-10	-7.90936e-10	-4.60578e-10	-3.07736e-10	-1.63016e-10	-6.79537e-10	-4.24126e-10	-8.43873e-10	-3.35701e-10	-2.81922e-10	-3.44882e-10	-5.03056e-10	-2.04907e-10	-1.89577e-10	-1.14568e-09	-2.1842e-10	-7.79086e-10
-5.06858e-10	-3.12285e-10	-4.1893e-10	-6.8042e-10	-4.35981e-10	-2.68557e-10	-1.16271e-09	-4.09762e-10	-5.03669e-10	-7.92375e-10	-4.61424e-10	-3.08246e-10	-1.63455e-10	-6.81504e-10	-4.24783e-10	-8.45695e-10	-3.37158e-10	-2.82464e-10	-3.45625e-10	-5.04783e-10	-2.05224e-10	-1.90016e-10	-1.14824e-09	-2.18737e-10	-7.8075e-10
-5.07621e-10	-3.13253e-10	-4.2002e-10	-6.81845e-10	-4.36449e-10	-2.69239e-10	-1.16551e-09	-4.11243e-10	-5.05255e-10	-7.93993e-10	-4.62216e-10	-3.0877e-10	-1.63832e-10	-6.83207e-10	-4.25378e-10	-8.47466e-10	-3.38487e-10	-2.82953e-10	-3.46316e-10	-5.06296e-10	-2.05508e-10	-1.90416e-10	-1.15074e-09	-2.19016e-10	-7.82361e-10
-5.08304e-10	-3.14101e-10	-4.21027e-10	-6.83241e-10	-4.36924e-10	-2.69869e-10	-1.16819e-09	-4.12871e-10	-5.06837e-10	-7.95702e-10	-4.62962e-10	-3.09265e-10	-1.64155e-10	-6.84771e-10	-4.25954e-10	-8.49118e-10	-3.39647e-10	-2.83431e-10	-3.47013e-10	-5.07628e-10	-2.05747e-10	-1.90797e-10	-1.1533e-09	-2.19298e-10	-7.83872e-10
-5.08978e-10	-3.14868e-10	-4.22019e-10	-6.84582e-10	-4.37394e-10	-2.70474e-10	-1.17071e-09	-4.1453e-10	-5.0828e-10	-7.97464e-10	-4.63655e-10	-3.09717e-10	-1.64479e-10	-6.86157e-10	-4.26485e-10	-8.50674e-10	-3.40629e-10	-2.83865e-10	-3.47653e-10	-5.0883e-10	-2.05938e-10	-1.91153e-10	-1.15582e-09	-2.19577e-10	-7.85351e-10
-5.09647e-10	-3.15561e-10	-4.23011e-10	-6.85847e-10	-4.37863e-10	-2.71029e-10	-1.1731e-09	-4.16133e-10	-5.09509e-10	-7.99144e-10	-4.64303e-10	-3.10172e-10	-1.64784e-10	-6.87363e-10	-4.26962e-10	-8.52155e-10	-3.41461e-10	-2.84244e-10	-3.48257e-10	-5.09959e-10	-2.06091e-10	-1.9149e-10	-1.15831e-09	-2.19828e-10	-7.86765e-10
-5.10275e-10	-3.16187e-10	-4.23933e-10	-6.87083e-10	-4.38342e-10	-2.71538e-10	-1.17536e-09	-4.17606e-10	-5.10539e-10	-8.00731e-10	-4.64955e-10	-3.10668e-10	-1.65049e-10	-6.88412e-10	-4.27462e-10	-8.53557e-10	-3.42176e-10	-2.84586e-10	-3.48816e-10	-5.11022e-10	-2.06234e-10	-1.91777e-10	-1.16076e-09	-2.20072e-10	-7.88103e-10
-5.10927e-10	-3.16744e-10	-4.24771e-10	-6.88289e-10	-4.38804e-10	-2.7205e-10	-1.17751e-09	-4.18944e-10	-5.11369e-10	-8.02301e-10	-4.65566e-10	-3.11149e-10	-1.65294e-10	-6.89345e-10	-4.27948e-10	-8.54892e-10	-3.42868e-10	-2.84904e-10	-3.49344e-10	-5.12105e-10	-2.06408e-10	-1.92028e-10	-1.163e-09	-2.2033e-10	-7.89432e-10
-5.11593e-10	-3.17252e-10	-4.25507e-10	-6.89468e-10	-4.39238e-10	-2.72551e-10	-1.17953e-09	-4.20175e-10	-5.12153e-10	-8.03894e-10	-4.66121e-10	-3.11614e-10	-1.65513e-10	-6.90206e-10	-4.28383e-10	-8.56225e-10	-3.4346e-10	-2.85213e-10	-3.49858e-10	-5.13236e-10	-2.06574e-10	-1.92275e-10	-1.16505e-09	-2.20601e-10	-7.90746e-10
-5.12196e-10	-3.17732e-10	-4.26169e-10	-6.90612e-10	-4.39675e-10	-2.73029e-10	-1.18144e-09	-4.21297e-10	-5.13113e-10	-8.05455e-10	-4.66658e-10	-3.12036e-10	-1.65723e-10	-6.91002e-10	-4.28756e-10	-8.57533e-10	-3.4401e-10	-2.85512e-10	-3.50388e-10	-5.14373e-10	-2.06721e-10	-1.92528e-10	-1.16703e-09	-2.20857e-10	-7.91986e-10
-5.12772e-10	-3.18209e-10	-4.26821e-10	-6.91738e-10	-4.40133e-10	-2.73503e-10	-1.18327e-09	-4.2235e-10	-5.14132e-10	-8.07027e-10	-4.67199e-10	-3.1245e-10	-1.65942e-10	-6.91808e-10	-4.29127e-10	-8.58823e-10	-3.44573e-10	-2.85822e-10	-3.50935e-10	-5.15496e-10	-2.06882e-10	-1.92796e-10	-1.16903e-09	-2.21083e-10	-7.93219e-10
-5.13363e-10	-3.18726e-10	-4.27486e-10	-6.92853e-10	-4.40616e-10	-2.74009e-10	-1.18507e-09	-4.23369e-10	-5.15136e-10	-8.08612e-10	-4.67752e-10	-3.12883e-10	-1.66177e-10	-6.92668e-10	-4.29552e-10	-8.60117e-10	-3.45139e-10	-2.86181e-10	-3.515e-10	-5.16607e-10	-2.07083e-10	-1.93104e-10	-1.17108e-09	-2.2129e-10	-7.94432e-10
-5.1397e-10	-3.19287e-10	-4.28162e-10	-6.93959e-10	-4.41124e-10	-2.74547e-10	-1.18687e-09	-4.24354e-10	-5.16123e-10	-8.10208e-10	-4.68317e-10	-3.13338e-10	-1.66427e-10	-6.93585e-10	-4.30033e-10	-8.61418e-10	-3.45708e-10	-2.8659e-10	-3.52085e-10	-5.17704e-10	-2.07323e-10	-1.93452e-10	-1.1732e-09	-2.21488e-10	-7.95616e-10
-5.14593e-10	-3.19892e-10	-4.28852e-10	-6.95056e-10	-4.41657e-10	-2.75119e-10	-1.18864e-09	-4.25306e-10	-5.17094e-10	-8.11815e-10	-4.68893e-10	-3.13814e-10	-1.66693e-10	-6.94559e-10	-4.3057e-10	-8.62725e-10	-3.4628e-10	-2.8705e-10	-3.52689e-10	-5.18787e-10	-2.07602e-10	-1.9384e-10	-1.17538e-09	-2.21682e-10	-7.96771e-10
-5.15234e-10	-3.2054e-10	-4.29554e-10	-6.96143e-10	-4.42215e-10	-2.75723e-10	-1.1904e-09	-4.26225e-10	-5.18048e-10	-8.13433e-10	-4.69479e-10	-3.14312e-10	-1.66975e-10	-6.95588e-10	-4.31163e-10	-8.64038e-10	-3.46855e-10	-2.8756e-10	-3.53313e-10	-5.19856e-10	-2.0792e-10	-1.94268e-10	-1.17761e-09	-2.21917e-10	-7.97914e-10
-5.1589e-10	-3.21232e-10	-4.30268e-10	-6.97222e-10	-4.42798e-10	-2.7636e-10	-1.19215e-09	-4.2711e-10	-5.18985e-10	-8.15063e-10	-4.70077e-10	-3.14831e-10	-1.67273e-10	-6.96674e-10	-4.31812e-10	-8.65358e-10	-3.47433e-10	-2.88122e-10	-3.53957e-10	-5.20911e-10	-2.08277e-10	-1.94737e-10	-1.17992e-09	-2.22198e-10	-7.99067e-10
-5.16563e-10	-3.21967e-10	-4.30995e-10	-6.98291e-10	-4.43407e-10	-2.77031e-10	-1.19388e-09	-4.27962e-10	-5.19906e-10	-8.16704e-10	-4.70687e-10	-3.15371e-10	-1.67587e-10	-6.97817e-10	-4.32517e-10	-8.66683e-10	-3.48014e-10	-2.88733e-10	-3.54621e-10	-5.21952e-10	-2.08673e-10	-1.95246e-10	-1.18228e-09	-2.22525e-10	-8.00235e-10
-5.17253e-10	-3.22746e-10	-4.31735e-10	-6.99351e-10	-4.4404e-10	-2.77734e-10	-1.19559e-09	-4.2878e-10	-5.2081e-10	-8.18357e-10	-4.71307e-10	-3.15933e-10	-1.67917e-10	-6.99015e-10	-4.33279e-10	-8.68016e-10	-3.48599e-10	-2.89396e-10	-3.55304e-10	-5.2298e-10	-2.09109e-10	-1.95795e-10	-1.1847e-09	-2.22899e-10	-8.01419e-10
-5.17959e-10	-3.23569e-10	-4.32487e-10	-7.00402e-10	-4.44698e-10	-2.7847e-10	-1.19729e-09	-4.29565e-10	-5.21697e-10	-8.2002e-10	-4.71939e-10	-3.16516e-10	-1.68263e-10	-7.0027e-10	-4.34096e-10	-8.69354e-10	-3.49186e-10	-2.90109e-10	-3.56007e-10	-5.23993e-10	-2.09583e-10	-1.96385e-10	-1.18719e-09	-2.2332e-10	-8.02618e-10
-5.18681e-10	-3.24435e-10	-4.33252e-10	-7.01443e-10	-4.45382e-10	-2.7924e-10	-1.19897e-09	-4.30317e-10	-5.22568e-10	-8.21695e-10	-4.72582e-10	-3.17121e-10	-1.68624e-10	-7.01589e-10	-4.34968e-10	-8.70699e-10	-3.49777e-10	-2.90872e-10	-3.56729e-10	-5.25046e-10	-2.1005e-10	-1.97046e-10	-1.18963e-09	-2.23787e-10	-8.03833e-10
-5.1942e-10	-3.25345e-10	-4.34029e-10	-7.02475e-10	-4.4609e-10	-2.80042e-10	-1.20064e-09	-4.31036e-10	-5.23422e-10	-8.23381e-10	-4.73237e-10	-3.17746e-10	-1.68987e-10	-7.03397e-10	-4.35837e-10	-8.72087e-10	-3.50517e-10	-2.91661e-10	-3.57415e-10	-5.26469e-10	-2.10468e-10	-1.97866e-10	-1.19196e-09	-2.24266e-10	-8.05087e-10
-5.20184e-10	-3.26373e-10	-4.34803e-10	-7.03499e-10	-4.46792e-10	-2.80902e-10	-1.20229e-09	-4.31708e-10	-5.24226e-10	-8.25083e-10	-4.73922e-10	-3.18363e-10	-1.6934e-10	-7.06108e-10	-4.36615e-10	-8.73684e-10	-3.51749e-10	-2.92505e-10	-3.58003e-10	-5.28247e-10	-2.10921e-10	-1.98676e-10	-1.19451e-09	-2.24684e-10	-8.06481e-10
-5.21022e-10	-3.27683e-10	-4.3554e-10	-7.04553e-10	-4.47462e-10	-2.81784e-10	-1.20403e-09	-4.32344e-10	-5.2493e-10	-8.26721e-10	-4.74671e-10	-3.18898e-10	-1.69814e-10	-7.08955e-10	-4.37383e-10	-8.75471e-10	-3.53048e-10	-2.93378e-10	-3.58529e-10	-5.30217e-10	-2.11354e-10	-1.99376e-10	-1.19712e-09	-2.25077e-10	-8.08061e-10
-5.21941e-10	-3.29256e-10	-4.36371e-10	-7.05666e-10	-4.48121e-10	-2.82621e-10	-1.20599e-09	-4.33011e-10	-5.25572e-10	-8.28256e-10	-4.75593e-10	-3.19413e-10	-1.70367e-10	-7.11519e-10	-4.38173e-10	-8.77333e-10	-3.54139e-10	-2.94175e-10	-3.59087e-10	-5.32177e-10	-2.11744e-10	-1.99991e-10	-1.19975e-09	-2.25408e-10	-8.09787e-10
-5.22909e-10	-3.3078e-10	-4.37446e-10	-7.06801e-10	-4.48745e-10	-2.83416e-10	-1.20808e-09	-4.33805e-10	-5.26118e-10	-8.29803e-10	-4.76965e-10	-3.1991e-10	-1.7086e-10	-7.13693e-10	-4.3892e-10	-8.79134e-10	-3.55113e-10	-2.94889e-10	-3.59718e-10	-5.34047e-10	-2.12043e-10	-2.00556e-10	-1.20239e-09	-2.25748e-10	-8.116e-10
-5.23891e-10	-3.32083e-10	-4.38725e-10	-7.07975e-10	-4.49361e-10	-2.8416e-10	-1.21029e-09	-4.34795e-10	-5.26563e-10	-8.31412e-10	-4.78868e-10	-3.20347e-10	-1.71273e-10	-7.15552e-10	-4.39592e-10	-8.80901e-10	-3.56062e-10	-2.95541e-10	-3.6038e-10	-5.35747e-10	-2.12275e-10	-2.01086e-10	-1.20495e-09	-2.26111e-10	-8.13383e-10
-5.24849e-10	-3.33205e-10	-4.40044e-10	-7.09204e-10	-4.49959e-10	-2.84844e-10	-1.21265e-09	-4.3601e-10	-5.26965e-10	-8.33005e-10	-4.80999e-10	-3.20726e-10	-1.71661e-10	-7.17147e-10	-4.4028e-10	-8.82591e-10	-3.57048e-10	-2.96132e-10	-3.61074e-10	-5.37286e-10	-2.12464e-10	-2.0157e-10	-1.20736e-09	-2.26452e-10	-8.15109e-10
-5.25755e-10	-3.34168e-10	-4.41294e-10	-7.10484e-10	-4.50514e-10	-2.85465e-10	-1.2152e-09	-4.37314e-10	-5.27332e-10	-8.34558e-10	-4.8303e-10	-3.21081e-10	-1.7201e-10	-7.18486e-10	-4.40989e-10	-8.84192e-10	-3.58059e-10	-2.96655e-10	-3.61736e-10	-5.38656e-10	-2.12625e-10	-2.01982e-10	-1.20971e-09	-2.26744e-10	-8.16789e-10
-5.26581e-10	-3.34992e-10	-4.42447e-10	-7.11823e-10	-4.51082e-10	-2.86059e-10	-1.21783e-09	-4.38681e-10	-5.27701e-10	-8.36113e-10	-4.84842e-10	-3.21455e-10	-1.72317e-10	-7.19695e-10	-4.41683e-10	-8.85699e-10	-3.58937e-10	-2.9713e-10	-3.62354e-10	-5.39981e-10	-2.12769e-10	-2.02344e-10	-1.21202e-09	-2.27008e-10	-8.18336e-10
-5.27348e-10	-3.35713e-10	-4.43527e-10	-7.13196e-10	-4.51913e-10	-2.86623e-10	-1.22036e-09	-4.4005e-10	-5.2806e-10	-8.37831e-10	-4.86512e-10	-3.21852e-10	-1.72603e-10	-7.20832e-10	-4.42374e-10	-8.87132e-10	-3.59745e-10	-2.97573e-10	-3.62983e-10	-5.41266e-10	-2.12891e-10	-2.0266e-10	-1.21426e-09	-2.27233e-10	-8.19843e-10
-5.28034e-10	-3.36361e-10	-4.4458e-10	-7.14638e-10	-4.53066e-10	-2.87141e-10	-1.22266e-09	-4.41382e-10	-5.28426e-10	-8.39626e-10	-4.87994e-10	-3.22242e-10	-1.72862e-10	-7.21846e-10	-4.43061e-10	-8.88534e-10	-3.60504e-10	-2.97979e-10	-3.63612e-10	-5.4246e-10	-2.13053e-10	-2.02967e-10	-1.21643e-09	-2.27435e-10	-8.2127e-10
-5.28675e-10	-3.36941e-10	-4.45588e-10	-7.16026e-10	-4.54282e-10	-2.87646e-10	-1.22486e-09	-4.42682e-10	-5.28764e-10	-8.41347e-10	-4.89284e-10	-3.22617e-10	-1.73082e-10	-7.22723e-10	-4.43702e-10	-8.89867e-10	-3.61163e-10	-2.98371e-10	-3.64189e-10	-5.43592e-10	-2.13203e-10	-2.0325e-10	-1.21848e-09	-2.27639e-10	-8.22585e-10
-5.29304e-10	-3.37453e-10	-4.46506e-10	-7.17301e-10	-4.55421e-10	-2.88127e-10	-1.22692e-09	-4.43905e-10	-5.29084e-10	-8.42983e-10	-4.90485e-10	-3.22955e-10	-1.73277e-10	-7.23524e-10	-4.44297e-10	-8.91157e-10	-3.6179e-10	-2.98741e-10	-3.64751e-10	-5.44687e-10	-2.13336e-10	-2.03554e-10	-1.2205e-09	-2.27866e-10	-8.23822e-10
-5.29941e-10	-3.37889e-10	-4.47363e-10	-7.18458e-10	-4.56475e-10	-2.8858e-10	-1.2288e-09	-4.45025e-10	-5.29416e-10	-8.44533e-10	-4.91643e-10	-3.23293e-10	-1.73472e-10	-7.24294e-10	-4.4484e-10	-8.92448e-10	-3.6242e-10	-2.99107e-10	-3.65295e-10	-5.45719e-10	-2.13447e-10	-2.03882e-10	-1.22246e-09	-2.28097e-10	-8.25042e-10
-5.30573e-10	-3.38268e-10	-4.48135e-10	-7.19582e-10	-4.5742e-10	-2.89019e-10	-1.23061e-09	-4.46087e-10	-5.29739e-10	-8.46056e-10	-4.92731e-10	-3.23667e-10	-1.73691e-10	-7.25022e-10	-4.45339e-10	-8.93726e-10	-3.62963e-10	-2.99457e-10	-3.65814e-10	-5.46736e-10	-2.13579e-10	-2.04195e-10	-1.2244e-09	-2.28307e-10	-8.26268e-10
-5.31217e-10	-3.38646e-10	-4.4888e-10	-7.20716e-10	-4.58297e-10	-2.89468e-10	-1.23237e-09	-4.47115e-10	-5.30063e-10	-8.47603e-10	-4.93778e-10	-3.24068e-10	-1.73922e-10	-7.25761e-10	-4.45849e-10	-8.94993e-10	-3.63451e-10	-2.99827e-10	-3.66345e-10	-5.47742e-10	-2.13755e-10	-2.04533e-10	-1.22632e-09	-2.2852e-10	-8.27495e-10
-5.31871e-10	-3.39061e-10	-4.49635e-10	-7.21838e-10	-4.59163e-10	-2.89941e-10	-1.23408e-09	-4.48115e-10	-5.30412e-10	-8.49158e-10	-4.948e-10	-3.24484e-10	-1.74164e-10	-7.26552e-10	-4.46406e-10	-8.96285e-10	-3.63938e-10	-3.00234e-10	-3.6689e-10	-5.4874e-10	-2.13971e-10	-2.04902e-10	-1.2283e-09	-2.28744e-10	-8.28699e-10
-5.32536e-10	-3.39516e-10	-4.50402e-10	-7.22949e-10	-4.60022e-10	-2.90437e-10	-1.23577e-09	-4.49087e-10	-5.30785e-10	-8.50719e-10	-4.95799e-10	-3.24913e-10	-1.74418e-10	-7.27397e-10	-4.47012e-10	-8.97605e-10	-3.64428e-10	-3.00679e-10	-3.6745e-10	-5.49728e-10	-2.14227e-10	-2.05303e-10	-1.23035e-09	-2.28951e-10	-8.29852e-10
-5.3321e-10	-3.40009e-10	-4.5118e-10	-7.24047e-10	-4.60874e-10	-2.90959e-10	-1.23743e-09	-4.50031e-10	-5.31183e-10	-8.52286e-10	-4.96775e-10	-3.25357e-10	-1.74682e-10	-7.28295e-10	-4.47666e-10	-8.98954e-10	-3.64922e-10	-3.01162e-10	-3.68025e-10	-5.50708e-10	-2.14522e-10	-2.05734e-10	-1.23246e-09	-2.29142e-10	-8.30968e-10
-5.33895e-10	-3.40541e-10	-4.5197e-10	-7.25132e-10	-4.61717e-10	-2.91504e-10	-1.23905e-09	-4.50947e-10	-5.31606e-10	-8.53859e-10	-4.97727e-10	-3.25814e-10	-1.74958e-10	-7.29248e-10	-4.48369e-10	-9.00332e-10	-3.65418e-10	-3.01682e-10	-3.68614e-10	-5.51679e-10	-2.14858e-10	-2.06197e-10	-1.23464e-09	-2.29376e-10	-8.32054e-10
-5.34589e-10	-3.41112e-10	-4.52772e-10	-7.26206e-10	-4.62553e-10	-2.92074e-10	-1.24064e-09	-4.51836e-10	-5.32053e-10	-8.55438e-10	-4.98657e-10	-3.26286e-10	-1.75245e-10	-7.30256e-10	-4.49121e-10	-9.01738e-10	-3.65918e-10	-3.02239e-10	-3.69218e-10	-5.52641e-10	-2.15233e-10	-2.06691e-10	-1.23689e-09	-2.2966e-10	-8.33169e-10
-5.35294e-10	-3.41722e-10	-4.53585e-10	-7.27267e-10	-4.63382e-10	-2.92668e-10	-1.24221e-09	-4.52697e-10	-5.32526e-10	-8.57023e-10	-4.99562e-10	-3.26772e-10	-1.75544e-10	-7.31317e-10	-4.49921e-10	-9.03172e-10	-3.6642e-10	-3.02834e-10	-3.69836e-10	-5.53594e-10	-2.15648e-10	-2.07216e-10	-1.2392e-09	-2.29993e-10	-8.34324e-10
-5.36008e-10	-3.42371e-10	-4.5441e-10	-7.28316e-10	-4.64202e-10	-2.93286e-10	-1.24374e-09	-4.5353e-10	-5.33024e-10	-8.58614e-10	-5.00445e-10	-3.27271e-10	-1.75854e-10	-7.32432e-10	-4.5077e-10	-9.04635e-10	-3.66926e-10	-3.03467e-10	-3.70469e-10	-5.54538e-10	-2.16104e-10	-2.07773e-10	-1.24158e-09	-2.30375e-10	-8.35519e-10
-5.36733e-10	-3.43059e-10	-4.55247e-10	-7.29352e-10	-4.65015e-10	-2.93929e-10	-1.24524e-09	-4.54336e-10	-5.33546e-10	-8.60211e-10	-5.01304e-10	-3.27785e-10	-1.76175e-10	-7.33602e-10	-4.51667e-10	-9.06126e-10	-3.67434e-10	-3.04138e-10	-3.71117e-10	-5.55473e-10	-2.16599e-10	-2.0836e-10	-1.24402e-09	-2.30806e-10	-8.36755e-10
-5.37467e-10	-3.43786e-10	-4.56095e-10	-7.30376e-10	-4.65821e-10	-2.94596e-10	-1.24671e-09	-4.55114e-10	-5.34094e-10	-8.61814e-10	-5.0214e-10	-3.28313e-10	-1.76507e-10	-7.3483e-10	-4.52612e-10	-9.07645e-10	-3.67946e-10	-3.04845e-10	-3.71778e-10	-5.56434e-10	-2.17111e-10	-2.09003e-10	-1.24646e-09	-2.31287e-10	-8.38031e-10
-5.38212e-10	-3.44552e-10	-4.56954e-10	-7.31388e-10	-4.66618e-10	-2.95287e-10	-1.24814e-09	-4.55864e-10	-5.34666e-10	-8.63423e-10	-5.02952e-10	-3.28854e-10	-1.76834e-10	-7.3647e-10	-4.5352e-10	-9.09183e-10	-3.68563e-10	-3.05554e-10	-3.72436e-10	-5.57661e-10	-2.17565e-10	-2.09766e-10	-1.24872e-09	-2.31767e-10	-8.39336e-10
-5.38949e-10	-3.45398e-10	-4.57815e-10	-7.3238e-10	-4.67376e-10	-2.96021e-10	-1.24956e-09	-4.56579e-10	-5.35254e-10	-8.65019e-10	-5.03736e-10	-3.29382e-10	-1.77189e-10	-7.38854e-10	-4.54311e-10	-9.10784e-10	-3.69646e-10	-3.06279e-10	-3.73059e-10	-5.59267e-10	-2.17974e-10	-2.10478e-10	-1.25108e-09	-2.32139e-10	-8.4067e-10
-5.39624e-10	-3.46448e-10	-4.58667e-10	-7.33377e-10	-4.68003e-10	-2.96809e-10	-1.25107e-09	-4.57255e-10	-5.35983e-10	-8.66605e-10	-5.04491e-10	-3.29825e-10	-1.77665e-10	-7.41346e-10	-4.55107e-10	-9.12478e-10	-3.70872e-10	-3.07021e-10	-3.73649e-10	-5.61106e-10	-2.18437e-10	-2.11105e-10	-1.25365e-09	-2.32464e-10	-8.42022e-10
-5.40362e-10	-3.47662e-10	-4.59476e-10	-7.3442e-10	-4.68519e-10	-2.97629e-10	-1.25294e-09	-4.57918e-10	-5.36935e-10	-8.68173e-10	-5.05302e-10	-3.3021e-10	-1.78118e-10	-7.43661e-10	-4.55864e-10	-9.14212e-10	-3.72027e-10	-3.07702e-10	-3.7424e-10	-5.63003e-10	-2.18872e-10	-2.11678e-10	-1.25629e-09	-2.3276e-10	-8.43495e-10
-5.41244e-10	-3.48844e-10	-4.60286e-10	-7.35547e-10	-4.68987e-10	-2.98429e-10	-1.25502e-09	-4.58706e-10	-5.37973e-10	-8.69694e-10	-5.06085e-10	-3.30589e-10	-1.78522e-10	-7.45665e-10	-4.56568e-10	-9.15897e-10	-3.73119e-10	-3.08332e-10	-3.7483e-10	-5.64841e-10	-2.19213e-10	-2.12211e-10	-1.2588e-09	-2.33043e-10	-8.44979e-10
-5.42158e-10	-3.49918e-10	-4.61127e-10	-7.36755e-10	-4.69419e-10	-2.99178e-10	-1.25716e-09	-4.59619e-10	-5.39276e-10	-8.71218e-10	-5.06808e-10	-3.30967e-10	-1.78884e-10	-7.47499e-10	-4.57198e-10	-9.17502e-10	-3.74157e-10	-3.0889e-10	-3.75453e-10	-5.66589e-10	-2.19498e-10	-2.12685e-10	-1.26115e-09	-2.33305e-10	-8.46419e-10
-5.43004e-10	-3.50883e-10	-4.6194e-10	-7.38028e-10	-4.69855e-10	-2.9986e-10	-1.25938e-09	-4.6069e-10	-5.40857e-10	-8.72767e-10	-5.07546e-10	-3.3136e-10	-1.79169e-10	-7.49216e-10	-4.57768e-10	-9.1899e-10	-3.75125e-10	-3.09429e-10	-3.7608e-10	-5.68207e-10	-2.19784e-10	-2.13098e-10	-1.26352e-09	-2.33551e-10	-8.47843e-10
-5.4377e-10	-3.51772e-10	-4.62729e-10	-7.39316e-10	-4.70327e-10	-3.00487e-10	-1.26163e-09	-4.61927e-10	-5.42578e-10	-8.74261e-10	-5.08251e-10	-3.3176e-10	-1.79401e-10	-7.5083e-10	-4.58338e-10	-9.20436e-10	-3.76022e-10	-3.09973e-10	-3.767e-10	-5.69707e-10	-2.20063e-10	-2.13476e-10	-1.26596e-09	-2.33775e-10	-8.49215e-10
-5.44494e-10	-3.52542e-10	-4.6354e-10	-7.40574e-10	-4.70832e-10	-3.01094e-10	-1.26383e-09	-4.6324e-10	-5.44319e-10	-8.75711e-10	-5.08878e-10	-3.3215e-10	-1.79644e-10	-7.52264e-10	-4.58919e-10	-9.21877e-10	-3.76852e-10	-3.10493e-10	-3.77294e-10	-5.71123e-10	-2.203e-10	-2.13849e-10	-1.26837e-09	-2.34003e-10	-8.50548e-10
-5.45166e-10	-3.53254e-10	-4.64357e-10	-7.41806e-10	-4.71353e-10	-3.0168e-10	-1.2659e-09	-4.64537e-10	-5.45965e-10	-8.77092e-10	-5.09487e-10	-3.32527e-10	-1.79916e-10	-7.53537e-10	-4.59491e-10	-9.23263e-10	-3.77557e-10	-3.1095e-10	-3.77862e-10	-5.72424e-10	-2.20502e-10	-2.14199e-10	-1.27069e-09	-2.34247e-10	-8.5188e-10
-5.45844e-10	-3.53928e-10	-4.65144e-10	-7.43031e-10	-4.71845e-10	-3.0223e-10	-1.26787e-09	-4.65821e-10	-5.47449e-10	-8.78478e-10	-5.10104e-10	-3.32915e-10	-1.80172e-10	-7.54667e-10	-4.60018e-10	-9.246e-10	-3.78178e-10	-3.11389e-10	-3.78429e-10	-5.73598e-10	-2.20676e-10	-2.14537e-10	-1.27294e-09	-2.34478e-10	-8.53181e-10
-5.46597e-10	-3.54546e-10	-4.65871e-10	-7.44284e-10	-4.72307e-10	-3.02745e-10	-1.26972e-09	-4.6705e-10	-5.48759e-10	-8.79898e-10	-5.10725e-10	-3.33303e-10	-1.80395e-10	-7.55669e-10	-4.60556e-10	-9.2587e-10	-3.78769e-10	-3.11818e-10	-3.78989e-10	-5.74702e-10	-2.20873e-10	-2.14847e-10	-1.27521e-09	-2.34671e-10	-8.54441e-10
-5.47357e-10	-3.55113e-10	-4.66539e-10	-7.45533e-10	-4.72769e-10	-3.03225e-10	-1.27152e-09	-4.68205e-10	-5.49926e-10	-8.81267e-10	-5.11372e-10	-3.33694e-10	-1.80578e-10	-7.56598e-10	-4.611e-10	-9.27102e-10	-3.79307e-10	-3.12193e-10	-3.79562e-10	-5.75735e-10	-2.21063e-10	-2.15128e-10	-1.27743e-09	-2.34837e-10	-8.55697e-10
-5.48057e-10	-3.55674e-10	-4.67171e-10	-7.46745e-10	-4.73264e-10	-3.03661e-10	-1.27325e-09	-4.69242e-10	-5.50945e-10	-8.82627e-10	-5.12014e-10	-3.34068e-10	-1.80731e-10	-7.57434e-10	-4.61593e-10	-9.28364e-10	-3.79798e-10	-3.12548e-10	-3.80186e-10	-5.76736e-10	-2.21251e-10	-2.15434e-10	-1.27959e-09	-2.35012e-10	-8.56919e-10
-5.48681e-10	-3.56224e-10	-4.67767e-10	-7.47934e-10	-4.73746e-10	-3.0406e-10	-1.27496e-09	-4.70202e-10	-5.51805e-10	-8.83952e-10	-5.12641e-10	-3.34411e-10	-1.80872e-10	-7.58182e-10	-4.62032e-10	-9.29687e-10	-3.80279e-10	-3.12907e-10	-3.80795e-10	-5.77811e-10	-2.21404e-10	-2.15727e-10	-1.2817e-09	-2.35182e-10	-8.58112e-10
-5.49279e-10	-3.56742e-10	-4.68363e-10	-7.49113e-10	-4.74222e-10	-3.04447e-10	-1.27665e-09	-4.71124e-10	-5.52588e-10	-8.85272e-10	-5.13255e-10	-3.34753e-10	-1.81026e-10	-7.58946e-10	-4.62485e-10	-9.31067e-10	-3.80778e-10	-3.13314e-10	-3.81394e-10	-5.78892e-10	-2.2156e-10	-2.16021e-10	-1.2838e-09	-2.35347e-10	-8.59266e-10
-5.49892e-10	-3.57278e-10	-4.68984e-10	-7.50274e-10	-4.74722e-10	-3.04855e-10	-1.27833e-09	-4.72025e-10	-5.53359e-10	-8.8663e-10	-5.1388e-10	-3.35113e-10	-1.812e-10	-7.59768e-10	-4.62982e-10	-9.32456e-10	-3.8128e-10	-3.13758e-10	-3.82005e-10	-5.79962e-10	-2.21762e-10	-2.16349e-10	-1.28594e-09	-2.35507e-10	-8.6042e-10
-5.50523e-10	-3.57836e-10	-4.6963e-10	-7.51418e-10	-4.75246e-10	-3.05287e-10	-1.27999e-09	-4.72906e-10	-5.54121e-10	-8.88028e-10	-5.14518e-10	-3.35491e-10	-1.81394e-10	-7.60651e-10	-4.63522e-10	-9.3385e-10	-3.81785e-10	-3.14239e-10	-3.8263e-10	-5.8102e-10	-2.22011e-10	-2.16714e-10	-1.28811e-09	-2.35666e-10	-8.61612e-10
-5.51172e-10	-3.58418e-10	-4.70301e-10	-7.52545e-10	-4.75796e-10	-3.05743e-10	-1.28162e-09	-4.73766e-10	-5.54875e-10	-8.89465e-10	-5.15167e-10	-3.35887e-10	-1.81609e-10	-7.61593e-10	-4.64107e-10	-9.35249e-10	-3.82291e-10	-3.14756e-10	-3.8327e-10	-5.82068e-10	-2.22306e-10	-2.17114e-10	-1.2903e-09	-2.35854e-10	-8.62775e-10
-5.51838e-10	-3.59022e-10	-4.70998e-10	-7.53653e-10	-4.7637e-10	-3.06222e-10	-1.28324e-09	-4.74607e-10	-5.55619e-10	-8.90942e-10	-5.1583e-10	-3.36301e-10	-1.81844e-10	-7.62595e-10	-4.64736e-10	-9.36654e-10	-3.828e-10	-3.1531e-10	-3.83924e-10	-5.83104e-10	-2.22648e-10	-2.1755e-10	-1.29253e-09	-2.36094e-10	-8.63913e-10
-5.52523e-10	-3.59649e-10	-4.71719e-10	-7.54744e-10	-4.76969e-10	-3.06724e-10	-1.28484e-09	-4.75427e-10	-5.56355e-10	-8.92459e-10	-5.16504e-10	-3.36734e-10	-1.82098e-10	-7.63656e-10	-4.65408e-10	-9.38065e-10	-3.83311e-10	-3.159e-10	-3.84593e-10	-5.8413e-10	-2.23036e-10	-2.18021e-10	-1.29479e-09	-2.36388e-10	-8.65063e-10
-5.53225e-10	-3.60298e-10	-4.72467e-10	-7.55817e-10	-4.77593e-10	-3.07251e-10	-1.28641e-09	-4.76226e-10	-5.57082e-10	-8.94015e-10	-5.17192e-10	-3.37184e-10	-1.82374e-10	-7.64777e-10	-4.66125e-10	-9.3948e-10	-3.83824e-10	-3.16527e-10	-3.85276e-10	-5.85145e-10	-2.23471e-10	-2.18528e-10	-1.29708e-09	-2.36735e-10	-8.66235e-10
-5.53944e-10	-3.6097e-10	-4.73239e-10	-7.56872e-10	-4.78242e-10	-3.078e-10	-1.28797e-09	-4.77006e-10	-5.578e-10	-8.95611e-10	-5.17891e-10	-3.37651e-10	-1.82669e-10	-7.65958e-10	-4.66885e-10	-9.40901e-10	-3.84339e-10	-3.1719e-10	-3.85974e-10	-5.86148e-10	-2.23952e-10	-2.1907e-10	-1.2994e-09	-2.37136e-10	-8.67429e-10
-5.54681e-10	-3.61665e-10	-4.74037e-10	-7.57909e-10	-4.78916e-10	-3.08374e-10	-1.2895e-09	-4.77765e-10	-5.58509e-10	-8.97247e-10	-5.18603e-10	-3.38137e-10	-1.82984e-10	-7.67199e-10	-4.6769e-10	-9.42328e-10	-3.84856e-10	-3.1789e-10	-3.86686e-10	-5.87141e-10	-2.2448e-10	-2.19648e-10	-1.30176e-09	-2.37591e-10	-8.68646e-10
-5.55436e-10	-3.62382e-10	-4.74861e-10	-7.58929e-10	-4.79615e-10	-3.08971e-10	-1.29102e-09	-4.78503e-10	-5.59209e-10	-8.98922e-10	-5.19328e-10	-3.38641e-10	-1.8332e-10	-7.68503e-10	-4.68538e-10	-9.4376e-10	-3.85376e-10	-3.18626e-10	-3.87413e-10	-5.88167e-10	-2.25011e-10	-2.20279e-10	-1.30409e-09	-2.38099e-10	-8.69883e-10
-5.56209e-10	-3.63123e-10	-4.75709e-10	-7.5993e-10	-4.80338e-10	-3.09592e-10	-1.29252e-09	-4.79222e-10	-5.599e-10	-9.00637e-10	-5.20065e-10	-3.39163e-10	-1.83663e-10	-7.70139e-10	-4.69383e-10	-9.45186e-10	-3.8601e-10	-3.19378e-10	-3.88121e-10	-5.89481e-10	-2.25409e-10	-2.21012e-10	-1.30631e-09	-2.38628e-10	-8.71121e-10
-5.56995e-10	-3.63935e-10	-4.76579e-10	-7.609e-10	-4.81052e-10	-3.10261e-10	-1.29399e-09	-4.79921e-10	-5.60547e-10	-9.0237e-10	-5.20826e-10	-3.39672e-10	-1.84035e-10	-7.72437e-10	-4.70172e-10	-9.46703e-10	-3.87057e-10	-3.20099e-10	-3.88758e-10	-5.9114e-10	-2.25759e-10	-2.21687e-10	-1.30872e-09	-2.39055e-10	-8.72387e-10
-5.57812e-10	-3.64957e-10	-4.7747e-10	-7.61827e-10	-4.81666e-10	-3.10978e-10	-1.2955e-09	-4.80598e-10	-5.61085e-10	-9.0408e-10	-5.21644e-10	-3.40099e-10	-1.84488e-10	-7.74924e-10	-4.70926e-10	-9.48321e-10	-3.88238e-10	-3.20755e-10	-3.89378e-10	-5.92973e-10	-2.26072e-10	-2.22299e-10	-1.31131e-09	-2.39409e-10	-8.7372e-10
-5.58677e-10	-3.66109e-10	-4.78493e-10	-7.62762e-10	-4.8221e-10	-3.11686e-10	-1.29717e-09	-4.81275e-10	-5.61552e-10	-9.05753e-10	-5.22589e-10	-3.40499e-10	-1.84939e-10	-7.77228e-10	-4.71626e-10	-9.50025e-10	-3.89298e-10	-3.21354e-10	-3.9004e-10	-5.94756e-10	-2.26329e-10	-2.22845e-10	-1.31395e-09	-2.39756e-10	-8.75199e-10
-5.59555e-10	-3.67252e-10	-4.79762e-10	-7.63689e-10	-4.82751e-10	-3.12417e-10	-1.29894e-09	-4.81985e-10	-5.61983e-10	-9.07387e-10	-5.23987e-10	-3.40909e-10	-1.8535e-10	-7.7935e-10	-4.72264e-10	-9.51698e-10	-3.90252e-10	-3.21898e-10	-3.90677e-10	-5.96378e-10	-2.26528e-10	-2.23324e-10	-1.3165e-09	-2.40085e-10	-8.76812e-10
-5.60408e-10	-3.68295e-10	-4.81105e-10	-7.64653e-10	-4.83299e-10	-3.13134e-10	-1.3009e-09	-4.82819e-10	-5.62413e-10	-9.08933e-10	-5.25864e-10	-3.41305e-10	-1.85702e-10	-7.81176e-10	-4.72871e-10	-9.53322e-10	-3.91249e-10	-3.22419e-10	-3.91334e-10	-5.97866e-10	-2.26687e-10	-2.23773e-10	-1.31911e-09	-2.40405e-10	-8.7845e-10
-5.61221e-10	-3.69244e-10	-4.82387e-10	-7.65653e-10	-4.83871e-10	-3.13799e-10	-1.30302e-09	-4.83928e-10	-5.62834e-10	-9.10439e-10	-5.27911e-10	-3.41658e-10	-1.86015e-10	-7.82667e-10	-4.73495e-10	-9.54875e-10	-3.92376e-10	-3.22949e-10	-3.92025e-10	-5.99249e-10	-2.26836e-10	-2.24167e-10	-1.3217e-09	-2.4069e-10	-8.80063e-10
-5.62039e-10	-3.70135e-10	-4.83548e-10	-7.66691e-10	-4.84424e-10	-3.14431e-10	-1.30528e-09	-4.85252e-10	-5.6324e-10	-9.11941e-10	-5.29886e-10	-3.41978e-10	-1.8639e-10	-7.83952e-10	-4.74112e-10	-9.5643e-10	-3.93545e-10	-3.23461e-10	-3.92634e-10	-6.0057e-10	-2.26989e-10	-2.24551e-10	-1.32426e-09	-2.40941e-10	-8.81615e-10
-5.62903e-10	-3.70948e-10	-4.84615e-10	-7.67812e-10	-4.84932e-10	-3.15006e-10	-1.30764e-09	-4.86635e-10	-5.63625e-10	-9.13448e-10	-5.31621e-10	-3.42332e-10	-1.86774e-10	-7.85109e-10	-4.74754e-10	-9.57969e-10	-3.94504e-10	-3.23988e-10	-3.93227e-10	-6.01785e-10	-2.27178e-10	-2.24945e-10	-1.32677e-09	-2.41164e-10	-8.83144e-10
-5.63778e-10	-3.71682e-10	-4.85621e-10	-7.68929e-10	-4.85428e-10	-3.15544e-10	-1.3099e-09	-4.88002e-10	-5.64012e-10	-9.14973e-10	-5.33121e-10	-3.42702e-10	-1.87077e-10	-7.86185e-10	-4.7537e-10	-9.59492e-10	-3.95402e-10	-3.24494e-10	-3.93787e-10	-6.02896e-10	-2.27379e-10	-2.25323e-10	-1.3292e-09	-2.41372e-10	-8.84622e-10
-5.64604e-10	-3.72341e-10	-4.86538e-10	-7.6998e-10	-4.85924e-10	-3.16048e-10	-1.31201e-09	-4.89324e-10	-5.64404e-10	-9.16547e-10	-5.34456e-10	-3.43108e-10	-1.87354e-10	-7.87159e-10	-4.75904e-10	-9.60919e-10	-3.96207e-10	-3.24959e-10	-3.94361e-10	-6.03906e-10	-2.27585e-10	-2.25674e-10	-1.33147e-09	-2.41573e-10	-8.86115e-10
-5.65335e-10	-3.72978e-10	-4.87428e-10	-7.70975e-10	-4.86435e-10	-3.16536e-10	-1.31405e-09	-4.90563e-10	-5.64779e-10	-9.18088e-10	-5.35638e-10	-3.4355e-10	-1.8765e-10	-7.88035e-10	-4.76433e-10	-9.62222e-10	-3.96964e-10	-3.25362e-10	-3.9494e-10	-6.04962e-10	-2.27775e-10	-2.2601e-10	-1.3336e-09	-2.41753e-10	-8.87588e-10
-5.65966e-10	-3.73594e-10	-4.88327e-10	-7.71927e-10	-4.86917e-10	-3.17024e-10	-1.31604e-09	-4.91674e-10	-5.65152e-10	-9.19629e-10	-5.36668e-10	-3.43988e-10	-1.87942e-10	-7.88824e-10	-4.76997e-10	-9.63439e-10	-3.97663e-10	-3.25734e-10	-3.95486e-10	-6.06078e-10	-2.27951e-10	-2.26324e-10	-1.33565e-09	-2.41935e-10	-8.89011e-10
-5.6656e-10	-3.74168e-10	-4.89202e-10	-7.72931e-10	-4.87365e-10	-3.17514e-10	-1.31794e-09	-4.9271e-10	-5.65526e-10	-9.21242e-10	-5.37618e-10	-3.44437e-10	-1.88183e-10	-7.89597e-10	-4.77529e-10	-9.64627e-10	-3.98254e-10	-3.26093e-10	-3.96042e-10	-6.07222e-10	-2.28135e-10	-2.26614e-10	-1.3377e-09	-2.42098e-10	-8.90387e-10
-5.67171e-10	-3.74733e-10	-4.90054e-10	-7.73947e-10	-4.87794e-10	-3.17983e-10	-1.31975e-09	-4.93691e-10	-5.65923e-10	-9.2281e-10	-5.38515e-10	-3.4487e-10	-1.88383e-10	-7.90326e-10	-4.77997e-10	-9.65808e-10	-3.98774e-10	-3.26444e-10	-3.96645e-10	-6.08353e-10	-2.28298e-10	-2.269e-10	-1.33984e-09	-2.42253e-10	-8.91745e-10
-5.67813e-10	-3.75304e-10	-4.90907e-10	-7.74954e-10	-4.88237e-10	-3.18431e-10	-1.32151e-09	-4.94646e-10	-5.66337e-10	-9.24337e-10	-5.39348e-10	-3.45315e-10	-1.88574e-10	-7.91047e-10	-4.7846e-10	-9.67007e-10	-3.99255e-10	-3.26807e-10	-3.97285e-10	-6.09455e-10	-2.2847e-10	-2.27206e-10	-1.34203e-09	-2.42406e-10	-8.93111e-10
-5.68468e-10	-3.75895e-10	-4.91752e-10	-7.75956e-10	-4.88715e-10	-3.1889e-10	-1.32326e-09	-4.95587e-10	-5.66779e-10	-9.25865e-10	-5.40167e-10	-3.45779e-10	-1.88781e-10	-7.91821e-10	-4.7896e-10	-9.68234e-10	-3.99746e-10	-3.27197e-10	-3.97935e-10	-6.1055e-10	-2.28671e-10	-2.27545e-10	-1.34425e-09	-2.42551e-10	-8.94443e-10
-5.69132e-10	-3.7651e-10	-4.92589e-10	-7.76954e-10	-4.89226e-10	-3.19361e-10	-1.32498e-09	-4.96512e-10	-5.6725e-10	-9.27395e-10	-5.40975e-10	-3.4626e-10	-1.89005e-10	-7.92649e-10	-4.79498e-10	-9.69489e-10	-4.0025e-10	-3.27614e-10	-3.98593e-10	-6.11639e-10	-2.28901e-10	-2.27915e-10	-1.34648e-09	-2.42681e-10	-8.95728e-10
-5.69806e-10	-3.77147e-10	-4.93417e-10	-7.77947e-10	-4.89772e-10	-3.19846e-10	-1.32669e-09	-4.97423e-10	-5.67751e-10	-9.28928e-10	-5.41773e-10	-3.4676e-10	-1.89246e-10	-7.93531e-10	-4.80075e-10	-9.70773e-10	-4.00768e-10	-3.28057e-10	-3.99258e-10	-6.12722e-10	-2.2916e-10	-2.28318e-10	-1.34873e-09	-2.42826e-10	-8.96977e-10
-5.70491e-10	-3.77806e-10	-4.94236e-10	-7.78936e-10	-4.90352e-10	-3.20343e-10	-1.32837e-09	-4.98319e-10	-5.68281e-10	-9.30463e-10	-5.42559e-10	-3.47279e-10	-1.89503e-10	-7.94467e-10	-4.80691e-10	-9.72084e-10	-4.01299e-10	-3.28526e-10	-3.99932e-10	-6.138e-10	-2.29447e-10	-2.28754e-10	-1.35101e-09	-2.43019e-10	-8.98169e-10
-5.71186e-10	-3.78488e-10	-4.95046e-10	-7.7992e-10	-4.90967e-10	-3.20853e-10	-1.33004e-09	-4.99201e-10	-5.6884e-10	-9.32001e-10	-5.43335e-10	-3.47816e-10	-1.89777e-10	-7.95458e-10	-4.81345e-10	-9.73423e-10	-4.01844e-10	-3.29022e-10	-4.00613e-10	-6.14872e-10	-2.29764e-10	-2.29221e-10	-1.3533e-09	-2.43266e-10	-8.99356e-10
-5.71891e-10	-3.79193e-10	-4.95848e-10	-7.80899e-10	-4.91615e-10	-3.21375e-10	-1.33168e-09	-5.00067e-10	-5.69429e-10	-9.33541e-10	-5.44099e-10	-3.48371e-10	-1.90067e-10	-7.96502e-10	-4.82039e-10	-9.74791e-10	-4.02403e-10	-3.29544e-10	-4.01303e-10	-6.15938e-10	-2.30109e-10	-2.29721e-10	-1.35562e-09	-2.43565e-10	-9.00557e-10
-5.72607e-10	-3.79921e-10	-4.96642e-10	-7.81874e-10	-4.92298e-10	-3.21911e-10	-1.3333e-09	-5.00919e-10	-5.70047e-10	-9.35084e-10	-5.44853e-10	-3.48945e-10	-1.90373e-10	-7.97601e-10	-4.82771e-10	-9.76187e-10	-4.02975e-10	-3.30093e-10	-4.02e-10	-6.16999e-10	-2.30483e-10	-2.30252e-10	-1.35795e-09	-2.43916e-10	-9.01773e-10
-5.73332e-10	-3.80671e-10	-4.97426e-10	-7.82845e-10	-4.93015e-10	-3.22459e-10	-1.33491e-09	-5.01757e-10	-5.70695e-10	-9.36629e-10	-5.45596e-10	-3.49537e-10	-1.90697e-10	-7.98754e-10	-4.83542e-10	-9.77611e-10	-4.03561e-10	-3.30669e-10	-4.02706e-10	-6.18053e-10	-2.30886e-10	-2.30816e-10	-1.36031e-09	-2.44321e-10	-9.03002e-10
-5.74068e-10	-3.81444e-10	-4.98202e-10	-7.83811e-10	-4.93766e-10	-3.2302e-10	-1.33649e-09	-5.02579e-10	-5.71372e-10	-9.38177e-10	-5.46327e-10	-3.50148e-10	-1.91037e-10	-7.99964e-10	-4.84351e-10	-9.79062e-10	-4.04161e-10	-3.31271e-10	-4.03419e-10	-6.19132e-10	-2.31281e-10	-2.31435e-10	-1.36264e-09	-2.44778e-10	-9.04245e-10
-5.74814e-10	-3.82239e-10	-4.9897e-10	-7.84772e-10	-4.94551e-10	-3.23594e-10	-1.33805e-09	-5.03387e-10	-5.72078e-10	-9.39727e-10	-5.47048e-10	-3.50777e-10	-1.91408e-10	-8.01527e-10	-4.85161e-10	-9.80513e-10	-4.04854e-10	-3.31907e-10	-4.04123e-10	-6.20445e-10	-2.31567e-10	-2.32183e-10	-1.36483e-09	-2.45244e-10	-9.05503e-10
-5.75576e-10	-3.83101e-10	-4.99722e-10	-7.85714e-10	-4.95329e-10	-3.24211e-10	-1.33962e-09	-5.04167e-10	-5.72822e-10	-9.41262e-10	-5.47765e-10	-3.51403e-10	-1.91829e-10	-8.03767e-10	-4.85968e-10	-9.81947e-10	-4.05796e-10	-3.32596e-10	-4.04778e-10	-6.22096e-10	-2.31837e-10	-2.32928e-10	-1.36697e-09	-2.45623e-10	-9.06801e-10
-5.76386e-10	-3.84131e-10	-5.00471e-10	-7.86591e-10	-4.96024e-10	-3.24917e-10	-1.3413e-09	-5.04898e-10	-5.73674e-10	-9.42759e-10	-5.48529e-10	-3.51951e-10	-1.92218e-10	-8.06062e-10	-4.86737e-10	-9.8335e-10	-4.06855e-10	-3.33285e-10	-4.05357e-10	-6.23954e-10	-2.32099e-10	-2.3361e-10	-1.3691e-09	-2.45981e-10	-9.08201e-10
-5.77211e-10	-3.85272e-10	-5.0122e-10	-7.87428e-10	-4.96662e-10	-3.25647e-10	-1.34311e-09	-5.05623e-10	-5.74647e-10	-9.44305e-10	-5.49353e-10	-3.52444e-10	-1.92596e-10	-8.08177e-10	-4.87445e-10	-9.84776e-10	-4.07895e-10	-3.33936e-10	-4.05958e-10	-6.2578e-10	-2.32323e-10	-2.34209e-10	-1.37123e-09	-2.46325e-10	-9.09687e-10
-5.78035e-10	-3.86365e-10	-5.01929e-10	-7.88284e-10	-4.9726e-10	-3.26328e-10	-1.34512e-09	-5.06406e-10	-5.75711e-10	-9.45851e-10	-5.5022e-10	-3.52885e-10	-1.92946e-10	-8.10107e-10	-4.88138e-10	-9.86202e-10	-4.08869e-10	-3.34524e-10	-4.06593e-10	-6.2752e-10	-2.32513e-10	-2.3473e-10	-1.37338e-09	-2.46671e-10	-9.1123e-10
-5.78864e-10	-3.8738e-10	-5.02577e-10	-7.89227e-10	-4.97825e-10	-3.26986e-10	-1.34725e-09	-5.07292e-10	-5.76902e-10	-9.47394e-10	-5.51059e-10	-3.53285e-10	-1.93258e-10	-8.11861e-10	-4.88751e-10	-9.87661e-10	-4.09826e-10	-3.35078e-10	-4.07302e-10	-6.29188e-10	-2.32694e-10	-2.35229e-10	-1.37569e-09	-2.47004e-10	-9.12781e-10
-5.79682e-10	-3.88296e-10	-5.03177e-10	-7.90302e-10	-4.9834e-10	-3.27623e-10	-1.34939e-09	-5.08352e-10	-5.78261e-10	-9.48937e-10	-5.51852e-10	-3.5366e-10	-1.93541e-10	-8.13489e-10	-4.893e-10	-9.89102e-10	-4.10731e-10	-3.35557e-10	-4.08042e-10	-6.30741e-10	-2.32877e-10	-2.35695e-10	-1.378e-09	-2.473e-10	-9.14285e-10
-5.80425e-10	-3.89122e-10	-5.03725e-10	-7.91418e-10	-4.98823e-10	-3.28231e-10	-1.35148e-09	-5.0965e-10	-5.79743e-10	-9.50579e-10	-5.52627e-10	-3.54004e-10	-1.9381e-10	-8.14963e-10	-4.89828e-10	-9.90477e-10	-4.1147e-10	-3.36038e-10	-4.08731e-10	-6.32189e-10	-2.33053e-10	-2.36122e-10	-1.38036e-09	-2.47578e-10	-9.15771e-10
-5.8113e-10	-3.89874e-10	-5.04224e-10	-7.92555e-10	-4.99327e-10	-3.28779e-10	-1.35358e-09	-5.1104e-10	-5.81106e-10	-9.523e-10	-5.53401e-10	-3.54317e-10	-1.94084e-10	-8.1642e-10	-4.9038e-10	-9.91801e-10	-4.12109e-10	-3.36527e-10	-4.09361e-10	-6.33591e-10	-2.33235e-10	-2.36529e-10	-1.38288e-09	-2.4781e-10	-9.17227e-10
-5.81847e-10	-3.90563e-10	-5.04754e-10	-7.93696e-10	-4.99845e-10	-3.29276e-10	-1.35564e-09	-5.12464e-10	-5.82395e-10	-9.5408e-10	-5.54246e-10	-3.54622e-10	-1.94335e-10	-8.17755e-10	-4.90969e-10	-9.93047e-10	-4.12632e-10	-3.36967e-10	-4.0996e-10	-6.34958e-10	-2.33416e-10	-2.3688e-10	-1.38547e-09	-2.48021e-10	-9.18686e-10
-5.8254e-10	-3.91208e-10	-5.05385e-10	-7.94806e-10	-5.00363e-10	-3.29738e-10	-1.35764e-09	-5.1382e-10	-5.83595e-10	-9.55902e-10	-5.55053e-10	-3.54944e-10	-1.94578e-10	-8.1892e-10	-4.91544e-10	-9.9424e-10	-4.13154e-10	-3.37373e-10	-4.10543e-10	-6.36238e-10	-2.3358e-10	-2.37206e-10	-1.38791e-09	-2.48213e-10	-9.20078e-10
-5.83146e-10	-3.91856e-10	-5.0608e-10	-7.9589e-10	-5.00877e-10	-3.30187e-10	-1.35951e-09	-5.15095e-10	-5.84664e-10	-9.57799e-10	-5.55779e-10	-3.55292e-10	-1.94814e-10	-8.1998e-10	-4.9208e-10	-9.95494e-10	-4.13651e-10	-3.37819e-10	-4.11079e-10	-6.37438e-10	-2.33715e-10	-2.37547e-10	-1.39017e-09	-2.48403e-10	-9.21462e-10
-5.83698e-10	-3.9244e-10	-5.06763e-10	-7.96961e-10	-5.01407e-10	-3.3063e-10	-1.36128e-09	-5.16339e-10	-5.85589e-10	-9.59674e-10	-5.56416e-10	-3.55633e-10	-1.95034e-10	-8.20959e-10	-4.92608e-10	-9.96728e-10	-4.14064e-10	-3.38263e-10	-4.11571e-10	-6.38574e-10	-2.33824e-10	-2.37852e-10	-1.39237e-09	-2.48582e-10	-9.22839e-10
-5.84242e-10	-3.92996e-10	-5.07379e-10	-7.98024e-10	-5.01936e-10	-3.31055e-10	-1.36304e-09	-5.17551e-10	-5.86377e-10	-9.61456e-10	-5.57002e-10	-3.55957e-10	-1.95254e-10	-8.21907e-10	-4.9312e-10	-9.97916e-10	-4.14477e-10	-3.38677e-10	-4.12061e-10	-6.39701e-10	-2.33934e-10	-2.38134e-10	-1.39455e-09	-2.48736e-10	-9.24153e-10
-5.84716e-10	-3.93522e-10	-5.07959e-10	-7.99027e-10	-5.02451e-10	-3.3147e-10	-1.36477e-09	-5.18689e-10	-5.87086e-10	-9.63151e-10	-5.57691e-10	-3.5627e-10	-1.95452e-10	-8.22754e-10	-4.936e-10	-9.9912e-10	-4.14884e-10	-3.39091e-10	-4.12605e-10	-6.40799e-10	-2.34049e-10	-2.38413e-10	-1.39667e-09	-2.48866e-10	-9.25461e-10
-5.85174e-10	-3.94044e-10	-5.08542e-10	-8.00005e-10	-5.02977e-10	-3.3189e-10	-1.36648e-09	-5.19774e-10	-5.87774e-10	-9.64815e-10	-5.58432e-10	-3.56598e-10	-1.95647e-10	-8.23615e-10	-4.94098e-10	-1.00035e-09	-4.15326e-10	-3.39533e-10	-4.13145e-10	-6.41841e-10	-2.34177e-10	-2.38701e-10	-1.39875e-09	-2.48996e-10	-9.26801e-10
-5.8567e-10	-3.94595e-10	-5.09139e-10	-8.00973e-10	-5.03528e-10	-3.32327e-10	-1.36819e-09	-5.20826e-10	-5.8847e-10	-9.66485e-10	-5.59168e-10	-3.56952e-10	-1.95856e-10	-8.24512e-10	-4.94626e-10	-1.0016e-09	-4.15776e-10	-3.40002e-10	-4.13696e-10	-6.42886e-10	-2.34339e-10	-2.39033e-10	-1.40086e-09	-2.49128e-10	-9.28121e-10
-5.86208e-10	-3.95177e-10	-5.09749e-10	-8.01931e-10	-5.04104e-10	-3.32781e-10	-1.36988e-09	-5.21842e-10	-5.89177e-10	-9.68162e-10	-5.59898e-10	-3.57333e-10	-1.96081e-10	-8.25443e-10	-4.95184e-10	-1.00288e-09	-4.16231e-10	-3.40499e-10	-4.1426e-10	-6.43934e-10	-2.34536e-10	-2.39412e-10	-1.403e-09	-2.49249e-10	-9.2939e-10
-5.86788e-10	-3.9579e-10	-5.10374e-10	-8.0288e-10	-5.04706e-10	-3.33252e-10	-1.37157e-09	-5.22825e-10	-5.89895e-10	-9.69847e-10	-5.60622e-10	-3.57739e-10	-1.96322e-10	-8.26409e-10	-4.95772e-10	-1.00417e-09	-4.16691e-10	-3.41023e-10	-4.14837e-10	-6.44987e-10	-2.34768e-10	-2.39836e-10	-1.40516e-09	-2.49373e-10	-9.30638e-10
-5.87409e-10	-3.96433e-10	-5.11012e-10	-8.03819e-10	-5.05333e-10	-3.33741e-10	-1.37325e-09	-5.23772e-10	-5.90623e-10	-9.7154e-10	-5.61339e-10	-3.58173e-10	-1.96578e-10	-8.2741e-10	-4.9639e-10	-1.00549e-09	-4.17158e-10	-3.41575e-10	-4.15427e-10	-6.46045e-10	-2.35034e-10	-2.40307e-10	-1.40736e-09	-2.49546e-10	-9.31887e-10
-5.88072e-10	-3.97106e-10	-5.11664e-10	-8.04748e-10	-5.05985e-10	-3.34248e-10	-1.37492e-09	-5.24685e-10	-5.91361e-10	-9.7324e-10	-5.6205e-10	-3.58632e-10	-1.9685e-10	-8.28445e-10	-4.97038e-10	-1.00683e-09	-4.1763e-10	-3.42155e-10	-4.1603e-10	-6.47107e-10	-2.35336e-10	-2.40823e-10	-1.40959e-09	-2.49771e-10	-9.3315e-10
-5.88776e-10	-3.9781e-10	-5.1233e-10	-8.05668e-10	-5.06663e-10	-3.34771e-10	-1.37657e-09	-5.25564e-10	-5.9211e-10	-9.74948e-10	-5.62755e-10	-3.59117e-10	-1.97137e-10	-8.29514e-10	-4.97716e-10	-1.00819e-09	-4.18107e-10	-3.42762e-10	-4.16647e-10	-6.48173e-10	-2.35673e-10	-2.41384e-10	-1.41185e-09	-2.50049e-10	-9.34425e-10
-5.89522e-10	-3.98545e-10	-5.1301e-10	-8.06578e-10	-5.07367e-10	-3.35313e-10	-1.37822e-09	-5.26408e-10	-5.9287e-10	-9.76664e-10	-5.63454e-10	-3.59629e-10	-1.9744e-10	-8.30619e-10	-4.98424e-10	-1.00957e-09	-4.1859e-10	-3.43398e-10	-4.17276e-10	-6.49244e-10	-2.36045e-10	-2.41992e-10	-1.41414e-09	-2.50379e-10	-9.35712e-10
-5.90309e-10	-3.99311e-10	-5.13704e-10	-8.07478e-10	-5.08095e-10	-3.35872e-10	-1.37986e-09	-5.27218e-10	-5.9364e-10	-9.78387e-10	-5.64147e-10	-3.60167e-10	-1.97759e-10	-8.31757e-10	-4.99161e-10	-1.01097e-09	-4.19078e-10	-3.4406e-10	-4.17919e-10	-6.50319e-10	-2.36452e-10	-2.42646e-10	-1.41646e-09	-2.50762e-10	-9.37011e-10
-5.91138e-10	-4.00107e-10	-5.14411e-10	-8.08368e-10	-5.0885e-10	-3.36448e-10	-1.38149e-09	-5.27993e-10	-5.9442e-10	-9.80117e-10	-5.64833e-10	-3.60732e-10	-1.98093e-10	-8.32933e-10	-4.99929e-10	-1.0124e-09	-4.19573e-10	-3.44751e-10	-4.18575e-10	-6.51422e-10	-2.36864e-10	-2.4335e-10	-1.41878e-09	-2.51198e-10	-9.38324e-10
-5.92008e-10	-4.00934e-10	-5.15132e-10	-8.09249e-10	-5.09629e-10	-3.37042e-10	-1.38311e-09	-5.28734e-10	-5.95211e-10	-9.81856e-10	-5.65514e-10	-3.61323e-10	-1.98442e-10	-8.34404e-10	-5.00694e-10	-1.01384e-09	-4.20162e-10	-3.45455e-10	-4.19205e-10	-6.52717e-10	-2.37209e-10	-2.44097e-10	-1.42103e-09	-2.51648e-10	-9.39677e-10
-5.92897e-10	-4.01813e-10	-5.15861e-10	-8.10108e-10	-5.10405e-10	-3.37666e-10	-1.38476e-09	-5.29444e-10	-5.95987e-10	-9.83587e-10	-5.66185e-10	-3.61926e-10	-1.98796e-10	-8.36626e-10	-5.01373e-10	-1.01528e-09	-4.21057e-10	-3.4619e-10	-4.19777e-10	-6.5428e-10	-2.37504e-10	-2.44802e-10	-1.42324e-09	-2.51998e-10	-9.41074e-10
-5.93719e-10	-4.02839e-10	-5.1659e-10	-8.10942e-10	-5.11105e-10	-3.3835e-10	-1.38654e-09	-5.30156e-10	-5.96664e-10	-9.85252e-10	-5.66884e-10	-3.62477e-10	-1.99154e-10	-8.38993e-10	-5.02001e-10	-1.01675e-09	-4.22134e-10	-3.46942e-10	-4.20348e-10	-6.55991e-10	-2.37755e-10	-2.45431e-10	-1.42557e-09	-2.52278e-10	-9.42556e-10
-5.94513e-10	-4.04017e-10	-5.17441e-10	-8.11783e-10	-5.11744e-10	-3.39058e-10	-1.38835e-09	-5.30875e-10	-5.97296e-10	-9.86798e-10	-5.67738e-10	-3.62964e-10	-1.99563e-10	-8.41122e-10	-5.02627e-10	-1.01819e-09	-4.23132e-10	-3.47634e-10	-4.20945e-10	-6.57658e-10	-2.38021e-10	-2.45985e-10	-1.428e-09	-2.52509e-10	-9.44158e-10
-5.95374e-10	-4.05162e-10	-5.18582e-10	-8.12609e-10	-5.123e-10	-3.39753e-10	-1.39022e-09	-5.31632e-10	-5.97931e-10	-9.8826e-10	-5.69166e-10	-3.63418e-10	-1.99928e-10	-8.43093e-10	-5.03259e-10	-1.01959e-09	-4.24148e-10	-3.48264e-10	-4.21539e-10	-6.59195e-10	-2.38314e-10	-2.46487e-10	-1.43039e-09	-2.52711e-10	-9.45774e-10
-5.9627e-10	-4.06172e-10	-5.20001e-10	-8.13454e-10	-5.12772e-10	-3.40438e-10	-1.39216e-09	-5.32495e-10	-5.98546e-10	-9.89711e-10	-5.71073e-10	-3.63834e-10	-2.00235e-10	-8.44954e-10	-5.03864e-10	-1.0209e-09	-4.25285e-10	-3.48819e-10	-4.22138e-10	-6.6065e-10	-2.38608e-10	-2.46945e-10	-1.4327e-09	-2.52922e-10	-9.47329e-10
-5.97206e-10	-4.07087e-10	-5.21492e-10	-8.14414e-10	-5.13198e-10	-3.41088e-10	-1.3942e-09	-5.33579e-10	-5.99119e-10	-9.91101e-10	-5.73144e-10	-3.64224e-10	-2.00482e-10	-8.46628e-10	-5.04462e-10	-1.02216e-09	-4.26247e-10	-3.49353e-10	-4.22763e-10	-6.62038e-10	-2.38851e-10	-2.47356e-10	-1.43491e-09	-2.53142e-10	-9.4885e-10
-5.98062e-10	-4.07922e-10	-5.22948e-10	-8.1551e-10	-5.13604e-10	-3.41699e-10	-1.39637e-09	-5.34836e-10	-5.99655e-10	-9.92459e-10	-5.75123e-10	-3.64615e-10	-2.00704e-10	-8.48117e-10	-5.05073e-10	-1.02341e-09	-4.27034e-10	-3.49883e-10	-4.23419e-10	-6.63333e-10	-2.39037e-10	-2.47741e-10	-1.43704e-09	-2.53364e-10	-9.50348e-10
-5.98868e-10	-4.08696e-10	-5.24328e-10	-8.16623e-10	-5.1399e-10	-3.42293e-10	-1.39848e-09	-5.36083e-10	-6.00139e-10	-9.93811e-10	-5.76877e-10	-3.65016e-10	-2.00941e-10	-8.49401e-10	-5.0572e-10	-1.02468e-09	-4.27756e-10	-3.50348e-10	-4.24062e-10	-6.6459e-10	-2.39184e-10	-2.4808e-10	-1.43909e-09	-2.5357e-10	-9.51813e-10
-5.99691e-10	-4.09391e-10	-5.25591e-10	-8.17693e-10	-5.14379e-10	-3.42848e-10	-1.40049e-09	-5.3732e-10	-6.00575e-10	-9.95218e-10	-5.78426e-10	-3.65404e-10	-2.01225e-10	-8.5052e-10	-5.06369e-10	-1.02591e-09	-4.28374e-10	-3.50767e-10	-4.24683e-10	-6.6579e-10	-2.39309e-10	-2.48377e-10	-1.441e-09	-2.53751e-10	-9.53203e-10
-6.00485e-10	-4.10036e-10	-5.26752e-10	-8.18764e-10	-5.14794e-10	-3.43368e-10	-1.4024e-09	-5.38591e-10	-6.01011e-10	-9.96594e-10	-5.79792e-10	-3.65782e-10	-2.01485e-10	-8.51569e-10	-5.06985e-10	-1.02716e-09	-4.28972e-10	-3.51165e-10	-4.25281e-10	-6.66897e-10	-2.3945e-10	-2.4867e-10	-1.44292e-09	-2.53917e-10	-9.54583e-10
-6.01231e-10	-4.10639e-10	-5.27842e-10	-8.19805e-10	-5.15227e-10	-3.43872e-10	-1.40422e-09	-5.39868e-10	-6.01444e-10	-9.97902e-10	-5.80978e-10	-3.66117e-10	-2.01698e-10	-8.52545e-10	-5.07552e-10	-1.02838e-09	-4.2956e-10	-3.51556e-10	-4.25857e-10	-6.67957e-10	-2.39603e-10	-2.48937e-10	-1.4449e-09	-2.54083e-10	-9.55953e-10
-6.01923e-10	-4.11233e-10	-5.28827e-10	-8.20804e-10	-5.1565e-10	-3.44348e-10	-1.40601e-09	-5.41105e-10	-6.01843e-10	-9.99182e-10	-5.81995e-10	-3.66424e-10	-2.01922e-10	-8.53505e-10	-5.08086e-10	-1.02955e-09	-4.30127e-10	-3.51941e-10	-4.26423e-10	-6.69039e-10	-2.39728e-10	-2.49198e-10	-1.44692e-09	-2.54255e-10	-9.57317e-10
-6.02627e-10	-4.11766e-10	-5.29685e-10	-8.21784e-10	-5.16064e-10	-3.44807e-10	-1.40775e-09	-5.42306e-10	-6.02227e-10	-1.00049e-09	-5.829e-10	-3.66712e-10	-2.02169e-10	-8.54381e-10	-5.08638e-10	-1.03073e-09	-4.30679e-10	-3.52328e-10	-4.26942e-10	-6.70148e-10	-2.39822e-10	-2.49452e-10	-1.44895e-09	-2.54438e-10	-9.58636e-10
-6.03417e-10	-4.12268e-10	-5.30478e-10	-8.22733e-10	-5.16452e-10	-3.45257e-10	-1.40935e-09	-5.43453e-10	-6.02588e-10	-1.00184e-09	-5.8376e-10	-3.66957e-10	-2.02403e-10	-8.55183e-10	-5.09206e-10	-1.032e-09	-4.31152e-10	-3.52714e-10	-4.27459e-10	-6.71286e-10	-2.39927e-10	-2.49722e-10	-1.45092e-09	-2.54604e-10	-9.59918e-10
-6.04233e-10	-4.12774e-10	-5.31255e-10	-8.23657e-10	-5.16848e-10	-3.45702e-10	-1.41088e-09	-5.44558e-10	-6.02962e-10	-1.00321e-09	-5.84606e-10	-3.67191e-10	-2.02654e-10	-8.55998e-10	-5.09781e-10	-1.03331e-09	-4.31599e-10	-3.53109e-10	-4.28012e-10	-6.72396e-10	-2.40061e-10	-2.50027e-10	-1.45288e-09	-2.5475e-10	-9.61212e-10
-6.05046e-10	-4.13303e-10	-5.32035e-10	-8.24575e-10	-5.17275e-10	-3.46169e-10	-1.4124e-09	-5.45634e-10	-6.03357e-10	-1.0046e-09	-5.85449e-10	-3.67454e-10	-2.0293e-10	-8.56845e-10	-5.10388e-10	-1.03464e-09	-4.32051e-10	-3.53531e-10	-4.28582e-10	-6.73507e-10	-2.40228e-10	-2.5037e-10	-1.45487e-09	-2.54902e-10	-9.62508e-10
-6.05855e-10	-4.13854e-10	-5.32821e-10	-8.25485e-10	-5.17734e-10	-3.46657e-10	-1.41392e-09	-5.4668e-10	-6.03772e-10	-1.00601e-09	-5.86288e-10	-3.67749e-10	-2.03228e-10	-8.57722e-10	-5.11027e-10	-1.03599e-09	-4.32509e-10	-3.53981e-10	-4.29169e-10	-6.74621e-10	-2.40426e-10	-2.5075e-10	-1.45689e-09	-2.55043e-10	-9.63766e-10
-6.06661e-10	-4.1443e-10	-5.33611e-10	-8.26389e-10	-5.18224e-10	-3.47167e-10	-1.41542e-09	-5.47698e-10	-6.04207e-10	-1.00745e-09	-5.87124e-10	-3.68074e-10	-2.0355e-10	-8.58632e-10	-5.11699e-10	-1.03736e-09	-4.32974e-10	-3.5446e-10	-4.29771e-10	-6.7574e-10	-2.40658e-10	-2.51168e-10	-1.45894e-09	-2.55182e-10	-9.64975e-10
-6.07463e-10	-4.15029e-10	-5.34406e-10	-8.27287e-10	-5.18746e-10	-3.47698e-10	-1.41693e-09	-5.48686e-10	-6.04663e-10	-1.00891e-09	-5.87956e-10	-3.68431e-10	-2.03895e-10	-8.59572e-10	-5.12402e-10	-1.03876e-09	-4.33445e-10	-3.54968e-10	-4.3039e-10	-6.76862e-10	-2.40922e-10	-2.51623e-10	-1.46103e-09	-2.5537e-10	-9.66185e-10
-6.08261e-10	-4.15651e-10	-5.35206e-10	-8.28178e-10	-5.193e-10	-3.4825e-10	-1.41842e-09	-5.49646e-10	-6.0514e-10	-1.01039e-09	-5.88785e-10	-3.6882e-10	-2.04263e-10	-8.60544e-10	-5.13139e-10	-1.04018e-09	-4.33922e-10	-3.55504e-10	-4.31025e-10	-6.77988e-10	-2.41218e-10	-2.52116e-10	-1.46315e-09	-2.55608e-10	-9.67442e-10
-6.09055e-10	-4.16297e-10	-5.3601e-10	-8.29063e-10	-5.19885e-10	-3.48824e-10	-1.41991e-09	-5.50576e-10	-6.05637e-10	-1.01189e-09	-5.8961e-10	-3.69239e-10	-2.04655e-10	-8.61548e-10	-5.13907e-10	-1.04162e-09	-4.34405e-10	-3.56069e-10	-4.31676e-10	-6.79117e-10	-2.41547e-10	-2.52647e-10	-1.4653e-09	-2.55897e-10	-9.68745e-10
-6.09846e-10	-4.16967e-10	-5.36819e-10	-8.29941e-10	-5.20502e-10	-3.4942e-10	-1.4214e-09	-5.51477e-10	-6.06156e-10	-1.01342e-09	-5.90432e-10	-3.6969e-10	-2.0507e-10	-8.62583e-10	-5.14708e-10	-1.04309e-09	-4.34894e-10	-3.56662e-10	-4.32343e-10	-6.8025e-10	-2.41908e-10	-2.53215e-10	-1.46748e-09	-2.56236e-10	-9.70097e-10
-6.10633e-10	-4.17661e-10	-5.37633e-10	-8.30813e-10	-5.2115e-10	-3.50036e-10	-1.42288e-09	-5.52349e-10	-6.06694e-10	-1.01497e-09	-5.91251e-10	-3.70172e-10	-2.05508e-10	-8.63649e-10	-5.15542e-10	-1.04458e-09	-4.3539e-10	-3.57284e-10	-4.33026e-10	-6.81387e-10	-2.42302e-10	-2.5382e-10	-1.46969e-09	-2.56626e-10	-9.71496e-10
-6.11417e-10	-4.18378e-10	-5.38451e-10	-8.31678e-10	-5.2183e-10	-3.50675e-10	-1.42435e-09	-5.53192e-10	-6.07254e-10	-1.01653e-09	-5.92066e-10	-3.70685e-10	-2.0597e-10	-8.64748e-10	-5.16408e-10	-1.04609e-09	-4.35893e-10	-3.57934e-10	-4.33726e-10	-6.82546e-10	-2.42706e-10	-2.54469e-10	-1.4719e-09	-2.57066e-10	-9.7294e-10
-6.12197e-10	-4.19119e-10	-5.39275e-10	-8.32536e-10	-5.22542e-10	-3.51335e-10	-1.42582e-09	-5.54006e-10	-6.07833e-10	-1.01813e-09	-5.92878e-10	-3.71229e-10	-2.06449e-10	-8.66118e-10	-5.17268e-10	-1.04759e-09	-4.36487e-10	-3.58593e-10	-4.34415e-10	-6.83856e-10	-2.43064e-10	-2.55105e-10	-1.47397e-09	-2.57525e-10	-9.74395e-10
-6.12974e-10	-4.19911e-10	-5.40101e-10	-8.33373e-10	-5.23261e-10	-3.52034e-10	-1.42729e-09	-5.54787e-10	-6.08401e-10	-1.01973e-09	-5.93693e-10	-3.71781e-10	-2.069e-10	-8.68273e-10	-5.18088e-10	-1.04908e-09	-4.37422e-10	-3.59333e-10	-4.35027e-10	-6.85371e-10	-2.4346e-10	-2.55674e-10	-1.47596e-09	-2.57891e-10	-9.75825e-10
-6.1376e-10	-4.20872e-10	-5.40908e-10	-8.34142e-10	-5.23892e-10	-3.52798e-10	-1.42881e-09	-5.55507e-10	-6.08896e-10	-1.02129e-09	-5.94502e-10	-3.72274e-10	-2.07333e-10	-8.70662e-10	-5.18847e-10	-1.05061e-09	-4.38529e-10	-3.60134e-10	-4.35558e-10	-6.8695e-10	-2.43779e-10	-2.56178e-10	-1.47798e-09	-2.58204e-10	-9.7726e-10
-6.14577e-10	-4.22001e-10	-5.41685e-10	-8.34854e-10	-5.24427e-10	-3.53591e-10	-1.43038e-09	-5.56179e-10	-6.09349e-10	-1.02274e-09	-5.95313e-10	-3.72691e-10	-2.0775e-10	-8.7275e-10	-5.19531e-10	-1.05217e-09	-4.39647e-10	-3.60879e-10	-4.36065e-10	-6.88538e-10	-2.44032e-10	-2.56622e-10	-1.48008e-09	-2.58515e-10	-9.78784e-10
-6.15443e-10	-4.23117e-10	-5.42441e-10	-8.35565e-10	-5.24939e-10	-3.54345e-10	-1.43209e-09	-5.56933e-10	-6.09736e-10	-1.02417e-09	-5.96093e-10	-3.73073e-10	-2.08147e-10	-8.74567e-10	-5.20147e-10	-1.05372e-09	-4.40576e-10	-3.61557e-10	-4.36591e-10	-6.90146e-10	-2.44292e-10	-2.57074e-10	-1.48222e-09	-2.58797e-10	-9.80355e-10
-6.16308e-10	-4.24206e-10	-5.43201e-10	-8.36312e-10	-5.25476e-10	-3.5505e-10	-1.43401e-09	-5.57829e-10	-6.10085e-10	-1.02565e-09	-5.96842e-10	-3.73461e-10	-2.08542e-10	-8.76325e-10	-5.20778e-10	-1.05527e-09	-4.414e-10	-3.62176e-10	-4.37162e-10	-6.91804e-10	-2.44524e-10	-2.57496e-10	-1.48434e-09	-2.59066e-10	-9.81902e-10
-6.17122e-10	-4.25224e-10	-5.43979e-10	-8.37068e-10	-5.26025e-10	-3.55707e-10	-1.436e-09	-5.58843e-10	-6.1044e-10	-1.02716e-09	-5.97557e-10	-3.73834e-10	-2.08864e-10	-8.77944e-10	-5.21425e-10	-1.05683e-09	-4.42229e-10	-3.6273e-10	-4.37791e-10	-6.93412e-10	-2.44725e-10	-2.57877e-10	-1.48653e-09	-2.59343e-10	-9.834e-10
-6.17869e-10	-4.26119e-10	-5.44783e-10	-8.37863e-10	-5.2657e-10	-3.56284e-10	-1.43798e-09	-5.60021e-10	-6.10792e-10	-1.02867e-09	-5.98252e-10	-3.74176e-10	-2.09125e-10	-8.79394e-10	-5.22053e-10	-1.05833e-09	-4.43025e-10	-3.63252e-10	-4.38422e-10	-6.94903e-10	-2.44896e-10	-2.58243e-10	-1.48865e-09	-2.59614e-10	-9.84849e-10
-6.18597e-10	-4.26933e-10	-5.45619e-10	-8.38742e-10	-5.27116e-10	-3.56822e-10	-1.44e-09	-5.61288e-10	-6.11164e-10	-1.03019e-09	-5.98943e-10	-3.74515e-10	-2.09365e-10	-8.80709e-10	-5.22601e-10	-1.05975e-09	-4.43804e-10	-3.63739e-10	-4.39023e-10	-6.96283e-10	-2.45062e-10	-2.58584e-10	-1.49065e-09	-2.59865e-10	-9.86295e-10
-6.19371e-10	-4.27687e-10	-5.46446e-10	-8.39679e-10	-5.2767e-10	-3.57351e-10	-1.44205e-09	-5.62562e-10	-6.11526e-10	-1.03173e-09	-5.99609e-10	-3.74865e-10	-2.09626e-10	-8.81954e-10	-5.23141e-10	-1.0611e-09	-4.44531e-10	-3.6421e-10	-4.39563e-10	-6.97578e-10	-2.45225e-10	-2.58929e-10	-1.49262e-09	-2.60076e-10	-9.87727e-10
-6.20166e-10	-4.28386e-10	-5.47193e-10	-8.40648e-10	-5.2828e-10	-3.57852e-10	-1.4441e-09	-5.63789e-10	-6.11865e-10	-1.03324e-09	-6.00198e-10	-3.75222e-10	-2.09915e-10	-8.83144e-10	-5.23774e-10	-1.06244e-09	-4.45167e-10	-3.64668e-10	-4.40043e-10	-6.98775e-10	-2.45398e-10	-2.59327e-10	-1.4945e-09	-2.60264e-10	-9.89073e-10
-6.20941e-10	-4.29024e-10	-5.4785e-10	-8.41615e-10	-5.2892e-10	-3.58304e-10	-1.44612e-09	-5.64929e-10	-6.12182e-10	-1.03469e-09	-6.00739e-10	-3.75559e-10	-2.10255e-10	-8.84264e-10	-5.24494e-10	-1.06376e-09	-4.45713e-10	-3.65114e-10	-4.40531e-10	-6.9992e-10	-2.45548e-10	-2.597e-10	-1.49649e-09	-2.60442e-10	-9.90384e-10
-6.21637e-10	-4.29621e-10	-5.48466e-10	-8.42574e-10	-5.29605e-10	-3.58749e-10	-1.44814e-09	-5.65986e-10	-6.12486e-10	-1.03608e-09	-6.01296e-10	-3.75863e-10	-2.10563e-10	-8.85246e-10	-5.25217e-10	-1.06505e-09	-4.46163e-10	-3.6552e-10	-4.4104e-10	-7.01061e-10	-2.45691e-10	-2.60023e-10	-1.49856e-09	-2.60611e-10	-9.91666e-10
-6.22255e-10	-4.30152e-10	-5.49045e-10	-8.43512e-10	-5.30284e-10	-3.59186e-10	-1.45006e-09	-5.66968e-10	-6.12769e-10	-1.03741e-09	-6.01842e-10	-3.76166e-10	-2.1085e-10	-8.86123e-10	-5.25868e-10	-1.06646e-09	-4.46588e-10	-3.65907e-10	-4.41611e-10	-7.02177e-10	-2.45896e-10	-2.60313e-10	-1.50053e-09	-2.60779e-10	-9.92904e-10
-6.22854e-10	-4.30671e-10	-5.49591e-10	-8.44416e-10	-5.30961e-10	-3.59591e-10	-1.45186e-09	-5.6789e-10	-6.13026e-10	-1.0387e-09	-6.02353e-10	-3.76476e-10	-2.11122e-10	-8.86969e-10	-5.26544e-10	-1.06789e-09	-4.47057e-10	-3.66327e-10	-4.42199e-10	-7.03305e-10	-2.46072e-10	-2.60608e-10	-1.50237e-09	-2.60956e-10	-9.94137e-10
-6.23468e-10	-4.31193e-10	-5.50149e-10	-8.45312e-10	-5.31641e-10	-3.59986e-10	-1.4536e-09	-5.688e-10	-6.13305e-10	-1.04002e-09	-6.02841e-10	-3.76791e-10	-2.11398e-10	-8.8785e-10	-5.2719e-10	-1.06928e-09	-4.47512e-10	-3.66733e-10	-4.42759e-10	-7.04459e-10	-2.46254e-10	-2.60936e-10	-1.50415e-09	-2.61135e-10	-9.95362e-10
-6.24104e-10	-4.31726e-10	-5.50729e-10	-8.46211e-10	-5.32324e-10	-3.60388e-10	-1.45532e-09	-5.69706e-10	-6.13618e-10	-1.04136e-09	-6.0333e-10	-3.77131e-10	-2.11682e-10	-8.88769e-10	-5.27861e-10	-1.07068e-09	-4.47992e-10	-3.67166e-10	-4.4333e-10	-7.05601e-10	-2.4647e-10	-2.61301e-10	-1.50598e-09	-2.61311e-10	-9.96577e-10
-6.24763e-10	-4.32272e-10	-5.51333e-10	-8.47112e-10	-5.33008e-10	-3.60797e-10	-1.45702e-09	-5.70608e-10	-6.13965e-10	-1.04274e-09	-6.03822e-10	-3.77498e-10	-2.11975e-10	-8.89725e-10	-5.2856e-10	-1.0721e-09	-4.48499e-10	-3.67629e-10	-4.43917e-10	-7.0673e-10	-2.4672e-10	-2.61703e-10	-1.50786e-09	-2.61469e-10	-9.97795e-10
-6.25444e-10	-4.3283e-10	-5.51959e-10	-8.48016e-10	-5.33696e-10	-3.61213e-10	-1.45872e-09	-5.71508e-10	-6.14346e-10	-1.04415e-09	-6.04317e-10	-3.77891e-10	-2.12276e-10	-8.90718e-10	-5.29288e-10	-1.07353e-09	-4.49034e-10	-3.68124e-10	-4.4452e-10	-7.07846e-10	-2.47005e-10	-2.62144e-10	-1.50978e-09	-2.61639e-10	-9.98956e-10
-6.26148e-10	-4.334e-10	-5.52608e-10	-8.48922e-10	-5.34386e-10	-3.61636e-10	-1.4604e-09	-5.72404e-10	-6.14762e-10	-1.0456e-09	-6.04815e-10	-3.7831e-10	-2.12584e-10	-8.91749e-10	-5.30045e-10	-1.07499e-09	-4.49596e-10	-3.68649e-10	-4.4514e-10	-7.08949e-10	-2.47323e-10	-2.62621e-10	-1.51174e-09	-2.61845e-10	-1.0001e-09
-6.26874e-10	-4.33983e-10	-5.53281e-10	-8.49831e-10	-5.35078e-10	-3.62066e-10	-1.46206e-09	-5.73297e-10	-6.15211e-10	-1.04708e-09	-6.05316e-10	-3.78755e-10	-2.12902e-10	-8.92817e-10	-5.3083e-10	-1.07646e-09	-4.50186e-10	-3.69206e-10	-4.45775e-10	-7.10039e-10	-2.47676e-10	-2.63137e-10	-1.51376e-09	-2.62087e-10	-1.00129e-09
-6.27623e-10	-4.34578e-10	-5.53976e-10	-8.50743e-10	-5.35773e-10	-3.62503e-10	-1.46371e-09	-5.74187e-10	-6.15695e-10	-1.0486e-09	-6.05819e-10	-3.79226e-10	-2.13227e-10	-8.93922e-10	-5.31644e-10	-1.07795e-09	-4.50803e-10	-3.69793e-10	-4.46426e-10	-7.11116e-10	-2.48063e-10	-2.6369e-10	-1.51582e-09	-2.62365e-10	-1.00252e-09
-6.28394e-10	-4.35186e-10	-5.54694e-10	-8.51658e-10	-5.36471e-10	-3.62947e-10	-1.46535e-09	-5.75073e-10	-6.16213e-10	-1.05015e-09	-6.06326e-10	-3.79724e-10	-2.13561e-10	-8.95065e-10	-5.32486e-10	-1.07946e-09	-4.51448e-10	-3.70411e-10	-4.47093e-10	-7.1218e-10	-2.48485e-10	-2.64281e-10	-1.51792e-09	-2.62679e-10	-1.0038e-09
-6.29188e-10	-4.35806e-10	-5.55435e-10	-8.52576e-10	-5.3717e-10	-3.63398e-10	-1.46698e-09	-5.75956e-10	-6.16764e-10	-1.05173e-09	-6.06836e-10	-3.80248e-10	-2.13903e-10	-8.96245e-10	-5.33357e-10	-1.08099e-09	-4.52121e-10	-3.71059e-10	-4.47776e-10	-7.13231e-10	-2.4894e-10	-2.6491e-10	-1.52008e-09	-2.63029e-10	-1.00511e-09
-6.30004e-10	-4.36439e-10	-5.56199e-10	-8.53496e-10	-5.37873e-10	-3.63856e-10	-1.46859e-09	-5.76836e-10	-6.1735e-10	-1.05335e-09	-6.07348e-10	-3.80797e-10	-2.14254e-10	-8.97464e-10	-5.34256e-10	-1.08254e-09	-4.52821e-10	-3.71739e-10	-4.48475e-10	-7.14311e-10	-2.49406e-10	-2.65586e-10	-1.52224e-09	-2.63414e-10	-1.00648e-09
-6.30843e-10	-4.37084e-10	-5.56986e-10	-8.54419e-10	-5.38578e-10	-3.64321e-10	-1.47019e-09	-5.77713e-10	-6.1797e-10	-1.055e-09	-6.07864e-10	-3.81373e-10	-2.14606e-10	-8.9894e-10	-5.35145e-10	-1.08409e-09	-4.536e-10	-3.72434e-10	-4.49146e-10	-7.156e-10	-2.49762e-10	-2.66291e-10	-1.52433e-09	-2.63803e-10	-1.00787e-09
-6.31684e-10	-4.37768e-10	-5.57782e-10	-8.55332e-10	-5.39266e-10	-3.64815e-10	-1.47181e-09	-5.78575e-10	-6.18591e-10	-1.05667e-09	-6.08389e-10	-3.81958e-10	-2.14948e-10	-9.01078e-10	-5.35925e-10	-1.08558e-09	-4.54589e-10	-3.73119e-10	-4.49721e-10	-7.17172e-10	-2.50045e-10	-2.66928e-10	-1.52646e-09	-2.64088e-10	-1.00926e-09
-6.32481e-10	-4.38634e-10	-5.58546e-10	-8.56208e-10	-5.39897e-10	-3.65423e-10	-1.47347e-09	-5.79399e-10	-6.19121e-10	-1.05826e-09	-6.08991e-10	-3.82489e-10	-2.15276e-10	-9.03295e-10	-5.36627e-10	-1.08705e-09	-4.55506e-10	-3.73781e-10	-4.50264e-10	-7.18861e-10	-2.50338e-10	-2.67518e-10	-1.52876e-09	-2.64331e-10	-1.01065e-09
-6.33282e-10	-4.39608e-10	-5.5944e-10	-8.57103e-10	-5.40489e-10	-3.66126e-10	-1.47509e-09	-5.80202e-10	-6.19561e-10	-1.05972e-09	-6.09666e-10	-3.82983e-10	-2.15559e-10	-9.05305e-10	-5.37326e-10	-1.08853e-09	-4.56252e-10	-3.74428e-10	-4.50838e-10	-7.20461e-10	-2.50598e-10	-2.68052e-10	-1.5312e-09	-2.64545e-10	-1.01212e-09
-6.34151e-10	-4.40562e-10	-5.6056e-10	-8.58025e-10	-5.41009e-10	-3.66823e-10	-1.47684e-09	-5.81034e-10	-6.19928e-10	-1.06118e-09	-6.10567e-10	-3.83444e-10	-2.15805e-10	-9.07083e-10	-5.38043e-10	-1.09005e-09	-4.56963e-10	-3.75085e-10	-4.51471e-10	-7.21904e-10	-2.50796e-10	-2.68515e-10	-1.53369e-09	-2.64744e-10	-1.01364e-09
-6.34991e-10	-4.4148e-10	-5.61765e-10	-8.58971e-10	-5.41474e-10	-3.67476e-10	-1.47879e-09	-5.81949e-10	-6.20256e-10	-1.06267e-09	-6.11937e-10	-3.83842e-10	-2.16074e-10	-9.08654e-10	-5.38765e-10	-1.09156e-09	-4.57704e-10	-3.75684e-10	-4.52076e-10	-7.23207e-10	-2.50951e-10	-2.68933e-10	-1.53609e-09	-2.64922e-10	-1.01515e-09
-6.35844e-10	-4.42329e-10	-5.62941e-10	-8.5995e-10	-5.41943e-10	-3.68095e-10	-1.48096e-09	-5.82984e-10	-6.2057e-10	-1.0642e-09	-6.13676e-10	-3.84191e-10	-2.16361e-10	-9.10111e-10	-5.39474e-10	-1.09305e-09	-4.58549e-10	-3.76204e-10	-4.52606e-10	-7.24382e-10	-2.51091e-10	-2.69335e-10	-1.53844e-09	-2.65097e-10	-1.01665e-09
-6.36703e-10	-4.43074e-10	-5.6407e-10	-8.60923e-10	-5.42425e-10	-3.68678e-10	-1.48324e-09	-5.84103e-10	-6.20864e-10	-1.06572e-09	-6.15475e-10	-3.84515e-10	-2.16634e-10	-9.11505e-10	-5.40131e-10	-1.0945e-09	-4.59385e-10	-3.76677e-10	-4.53105e-10	-7.25516e-10	-2.51302e-10	-2.69716e-10	-1.54085e-09	-2.65301e-10	-1.01805e-09
-6.37541e-10	-4.43782e-10	-5.65125e-10	-8.61934e-10	-5.42896e-10	-3.69226e-10	-1.48545e-09	-5.85282e-10	-6.21143e-10	-1.06714e-09	-6.17078e-10	-3.84834e-10	-2.16903e-10	-9.12793e-10	-5.40805e-10	-1.0959e-09	-4.6014e-10	-3.77154e-10	-4.53581e-10	-7.26652e-10	-2.51547e-10	-2.70078e-10	-1.54325e-09	-2.65543e-10	-1.0194e-09
-6.38347e-10	-4.44453e-10	-5.66087e-10	-8.62935e-10	-5.43432e-10	-3.69781e-10	-1.48753e-09	-5.86437e-10	-6.21426e-10	-1.06843e-09	-6.18457e-10	-3.8514e-10	-2.17132e-10	-9.13954e-10	-5.41485e-10	-1.0973e-09	-4.60771e-10	-3.77577e-10	-4.54059e-10	-7.27746e-10	-2.51787e-10	-2.7044e-10	-1.54547e-09	-2.65768e-10	-1.02072e-09
-6.39092e-10	-4.45104e-10	-5.66986e-10	-8.63921e-10	-5.44001e-10	-3.7033e-10	-1.48949e-09	-5.87675e-10	-6.21723e-10	-1.06974e-09	-6.19658e-10	-3.85459e-10	-2.17352e-10	-9.15016e-10	-5.42103e-10	-1.09868e-09	-4.61341e-10	-3.7796e-10	-4.54554e-10	-7.28816e-10	-2.52046e-10	-2.7079e-10	-1.54763e-09	-2.65963e-10	-1.02201e-09
-6.39779e-10	-4.45729e-10	-5.67861e-10	-8.64933e-10	-5.44574e-10	-3.70837e-10	-1.49144e-09	-5.88969e-10	-6.2204e-10	-1.0711e-09	-6.20736e-10	-3.85811e-10	-2.17609e-10	-9.16042e-10	-5.4269e-10	-1.10001e-09	-4.61886e-10	-3.78328e-10	-4.55061e-10	-7.29869e-10	-2.52301e-10	-2.71107e-10	-1.54986e-09	-2.66139e-10	-1.02331e-09
-6.40429e-10	-4.46284e-10	-5.68713e-10	-8.65967e-10	-5.45196e-10	-3.71322e-10	-1.49344e-09	-5.90201e-10	-6.22368e-10	-1.07247e-09	-6.21687e-10	-3.86164e-10	-2.1786e-10	-9.16973e-10	-5.43275e-10	-1.10138e-09	-4.624e-10	-3.78708e-10	-4.55574e-10	-7.30868e-10	-2.52544e-10	-2.71411e-10	-1.55207e-09	-2.663e-10	-1.02462e-09
-6.41117e-10	-4.46801e-10	-5.69493e-10	-8.66952e-10	-5.45828e-10	-3.7176e-10	-1.49534e-09	-5.91352e-10	-6.22659e-10	-1.07376e-09	-6.2257e-10	-3.86505e-10	-2.18068e-10	-9.17865e-10	-5.43824e-10	-1.1028e-09	-4.62899e-10	-3.79086e-10	-4.56084e-10	-7.31778e-10	-2.52748e-10	-2.71695e-10	-1.55416e-09	-2.66433e-10	-1.0259e-09
-6.41859e-10	-4.47367e-10	-5.70205e-10	-8.67883e-10	-5.46448e-10	-3.72165e-10	-1.49713e-09	-5.92414e-10	-6.22935e-10	-1.07496e-09	-6.23377e-10	-3.86888e-10	-2.18273e-10	-9.18707e-10	-5.44399e-10	-1.10423e-09	-4.63392e-10	-3.79453e-10	-4.56615e-10	-7.32691e-10	-2.52913e-10	-2.7198e-10	-1.55616e-09	-2.66542e-10	-1.0272e-09
-6.42586e-10	-4.47969e-10	-5.70897e-10	-8.68782e-10	-5.47069e-10	-3.72572e-10	-1.49889e-09	-5.93406e-10	-6.23229e-10	-1.07613e-09	-6.24176e-10	-3.8728e-10	-2.185e-10	-9.19558e-10	-5.44986e-10	-1.10566e-09	-4.63857e-10	-3.79839e-10	-4.57157e-10	-7.33649e-10	-2.53078e-10	-2.72284e-10	-1.55815e-09	-2.66642e-10	-1.02846e-09
-6.43323e-10	-4.48591e-10	-5.71596e-10	-8.69673e-10	-5.477e-10	-3.72988e-10	-1.50062e-09	-5.94382e-10	-6.2355e-10	-1.07733e-09	-6.24974e-10	-3.87684e-10	-2.18745e-10	-9.20444e-10	-5.45606e-10	-1.10711e-09	-4.64323e-10	-3.80249e-10	-4.57715e-10	-7.34603e-10	-2.53286e-10	-2.72629e-10	-1.56017e-09	-2.6676e-10	-1.02965e-09
-6.44073e-10	-4.49233e-10	-5.72304e-10	-8.70556e-10	-5.48342e-10	-3.7341e-10	-1.50234e-09	-5.95343e-10	-6.239e-10	-1.07857e-09	-6.25772e-10	-3.88104e-10	-2.19007e-10	-9.21364e-10	-5.46263e-10	-1.10859e-09	-4.64792e-10	-3.80683e-10	-4.58292e-10	-7.35551e-10	-2.53538e-10	-2.73017e-10	-1.56223e-09	-2.66888e-10	-1.03084e-09
-6.44836e-10	-4.49896e-10	-5.7302e-10	-8.71432e-10	-5.48995e-10	-3.73841e-10	-1.50404e-09	-5.9629e-10	-6.24279e-10	-1.07985e-09	-6.26569e-10	-3.88538e-10	-2.19287e-10	-9.22318e-10	-5.46955e-10	-1.11009e-09	-4.65264e-10	-3.8114e-10	-4.58888e-10	-7.3649e-10	-2.53834e-10	-2.73446e-10	-1.56431e-09	-2.67043e-10	-1.03203e-09
-6.45612e-10	-4.50578e-10	-5.73745e-10	-8.72301e-10	-5.4966e-10	-3.74279e-10	-1.50572e-09	-5.97223e-10	-6.24686e-10	-1.08116e-09	-6.27365e-10	-3.88988e-10	-2.19584e-10	-9.23307e-10	-5.47683e-10	-1.11162e-09	-4.65739e-10	-3.8162e-10	-4.59503e-10	-7.37422e-10	-2.54174e-10	-2.73918e-10	-1.56644e-09	-2.67244e-10	-1.03321e-09
-6.464e-10	-4.5128e-10	-5.74477e-10	-8.73162e-10	-5.50335e-10	-3.74725e-10	-1.50739e-09	-5.98142e-10	-6.25122e-10	-1.08251e-09	-6.28161e-10	-3.89452e-10	-2.199e-10	-9.24329e-10	-5.48447e-10	-1.11317e-09	-4.66217e-10	-3.82123e-10	-4.60136e-10	-7.38347e-10	-2.54557e-10	-2.74431e-10	-1.56859e-09	-2.67491e-10	-1.03443e-09
-6.47202e-10	-4.52003e-10	-5.75218e-10	-8.74016e-10	-5.51022e-10	-3.75179e-10	-1.50903e-09	-5.99047e-10	-6.25586e-10	-1.0839e-09	-6.28957e-10	-3.89931e-10	-2.20233e-10	-9.25385e-10	-5.49247e-10	-1.11475e-09	-4.66698e-10	-3.82649e-10	-4.60788e-10	-7.39265e-10	-2.54984e-10	-2.74986e-10	-1.57078e-09	-2.67784e-10	-1.03568e-09
-6.48016e-10	-4.52745e-10	-5.75968e-10	-8.74862e-10	-5.5172e-10	-3.7564e-10	-1.51067e-09	-5.99938e-10	-6.26079e-10	-1.08533e-09	-6.29752e-10	-3.90425e-10	-2.20584e-10	-9.26476e-10	-5.50083e-10	-1.11635e-09	-4.67182e-10	-3.83199e-10	-4.61458e-10	-7.40174e-10	-2.55455e-10	-2.75584e-10	-1.57299e-09	-2.68123e-10	-1.03696e-09
-6.48843e-10	-4.53508e-10	-5.76725e-10	-8.75701e-10	-5.52429e-10	-3.76109e-10	-1.51228e-09	-6.00814e-10	-6.266e-10	-1.08679e-09	-6.30546e-10	-3.90935e-10	-2.20952e-10	-9.27601e-10	-5.50954e-10	-1.11798e-09	-4.67669e-10	-3.83773e-10	-4.62147e-10	-7.41077e-10	-2.5597e-10	-2.76223e-10	-1.57525e-09	-2.68509e-10	-1.03828e-09
-6.49684e-10	-4.54291e-10	-5.77491e-10	-8.76532e-10	-5.53149e-10	-3.76586e-10	-1.51387e-09	-6.01677e-10	-6.2715e-10	-1.08829e-09	-6.3134e-10	-3.91459e-10	-2.21338e-10	-9.2876e-10	-5.51861e-10	-1.11964e-09	-4.68159e-10	-3.84369e-10	-4.62854e-10	-7.41986e-10	-2.56509e-10	-2.76921e-10	-1.57752e-09	-2.68941e-10	-1.03963e-09
-6.50537e-10	-4.55093e-10	-5.78265e-10	-8.77356e-10	-5.5388e-10	-3.77071e-10	-1.51545e-09	-6.02526e-10	-6.27728e-10	-1.08983e-09	-6.32133e-10	-3.91998e-10	-2.21737e-10	-9.30161e-10	-5.52768e-10	-1.1213e-09	-4.68725e-10	-3.84984e-10	-4.63531e-10	-7.42998e-10	-2.5699e-10	-2.77672e-10	-1.57966e-09	-2.69383e-10	-1.04099e-09
-6.51403e-10	-4.55917e-10	-5.79045e-10	-8.78164e-10	-5.54599e-10	-3.77569e-10	-1.51704e-09	-6.03358e-10	-6.28373e-10	-1.09139e-09	-6.32912e-10	-3.92529e-10	-2.22123e-10	-9.32222e-10	-5.53545e-10	-1.12296e-09	-4.69621e-10	-3.85626e-10	-4.64077e-10	-7.44218e-10	-2.57402e-10	-2.78303e-10	-1.58167e-09	-2.69725e-10	-1.04232e-09
-6.52278e-10	-4.56777e-10	-5.79799e-10	-8.78955e-10	-5.55235e-10	-3.78134e-10	-1.51868e-09	-6.04143e-10	-6.2936e-10	-1.0929e-09	-6.33635e-10	-3.92977e-10	-2.22485e-10	-9.345e-10	-5.54239e-10	-1.12461e-09	-4.7068e-10	-3.86227e-10	-4.64597e-10	-7.45658e-10	-2.57753e-10	-2.78883e-10	-1.58386e-09	-2.70034e-10	-1.04368e-09
-6.53116e-10	-4.57706e-10	-5.80493e-10	-8.79765e-10	-5.55794e-10	-3.7875e-10	-1.5204e-09	-6.0493e-10	-6.30553e-10	-1.09441e-09	-6.3434e-10	-3.93361e-10	-2.22837e-10	-9.36506e-10	-5.54902e-10	-1.12619e-09	-4.71609e-10	-3.86774e-10	-4.65173e-10	-7.47121e-10	-2.58073e-10	-2.7939e-10	-1.58603e-09	-2.70305e-10	-1.04511e-09
-6.53973e-10	-4.5866e-10	-5.81174e-10	-8.80629e-10	-5.56309e-10	-3.79389e-10	-1.52222e-09	-6.05797e-10	-6.3174e-10	-1.09588e-09	-6.35061e-10	-3.93726e-10	-2.23178e-10	-9.38215e-10	-5.55555e-10	-1.12769e-09	-4.72363e-10	-3.87297e-10	-4.65764e-10	-7.4854e-10	-2.5836e-10	-2.79813e-10	-1.58828e-09	-2.70534e-10	-1.0466e-09
-6.54788e-10	-4.59626e-10	-5.81943e-10	-8.81549e-10	-5.56811e-10	-3.80024e-10	-1.52416e-09	-6.06728e-10	-6.3309e-10	-1.09734e-09	-6.35699e-10	-3.94048e-10	-2.23538e-10	-9.39812e-10	-5.56191e-10	-1.12913e-09	-4.73137e-10	-3.87792e-10	-4.66349e-10	-7.50046e-10	-2.58603e-10	-2.80202e-10	-1.59064e-09	-2.70772e-10	-1.04806e-09
-6.55572e-10	-4.60525e-10	-5.82723e-10	-8.82495e-10	-5.57289e-10	-3.80598e-10	-1.52629e-09	-6.07824e-10	-6.34639e-10	-1.09878e-09	-6.36271e-10	-3.94325e-10	-2.2388e-10	-9.41301e-10	-5.56788e-10	-1.13052e-09	-4.73921e-10	-3.8831e-10	-4.6696e-10	-7.51557e-10	-2.58806e-10	-2.80565e-10	-1.59289e-09	-2.71025e-10	-1.04949e-09
-6.56338e-10	-4.61343e-10	-5.83458e-10	-8.83466e-10	-5.57777e-10	-3.81167e-10	-1.5284e-09	-6.08989e-10	-6.36127e-10	-1.10019e-09	-6.3686e-10	-3.94583e-10	-2.24161e-10	-9.42631e-10	-5.57359e-10	-1.13194e-09	-4.74761e-10	-3.88836e-10	-4.67585e-10	-7.5297e-10	-2.58979e-10	-2.80922e-10	-1.59508e-09	-2.7126e-10	-1.05088e-09
-6.57109e-10	-4.62125e-10	-5.84187e-10	-8.84436e-10	-5.58291e-10	-3.81753e-10	-1.53049e-09	-6.10188e-10	-6.37517e-10	-1.10156e-09	-6.37413e-10	-3.94861e-10	-2.24414e-10	-9.43879e-10	-5.57872e-10	-1.13335e-09	-4.7566e-10	-3.89305e-10	-4.68152e-10	-7.54341e-10	-2.59143e-10	-2.81256e-10	-1.59715e-09	-2.71489e-10	-1.05231e-09
-6.57887e-10	-4.62901e-10	-5.84909e-10	-8.85373e-10	-5.58877e-10	-3.82332e-10	-1.53253e-09	-6.11397e-10	-6.38789e-10	-1.10293e-09	-6.37943e-10	-3.95121e-10	-2.24652e-10	-9.45133e-10	-5.58413e-10	-1.13471e-09	-4.76391e-10	-3.89734e-10	-4.68657e-10	-7.55603e-10	-2.59305e-10	-2.81548e-10	-1.59918e-09	-2.71722e-10	-1.05375e-09
-6.58615e-10	-4.6361e-10	-5.85629e-10	-8.86259e-10	-5.59507e-10	-3.82874e-10	-1.53452e-09	-6.1258e-10	-6.39954e-10	-1.10431e-09	-6.38473e-10	-3.95381e-10	-2.24894e-10	-9.46332e-10	-5.58964e-10	-1.13607e-09	-4.77025e-10	-3.90173e-10	-4.69207e-10	-7.56722e-10	-2.59462e-10	-2.81839e-10	-1.60123e-09	-2.71945e-10	-1.05511e-09
-6.59314e-10	-4.64283e-10	-5.8632e-10	-8.87142e-10	-5.60142e-10	-3.83375e-10	-1.53639e-09	-6.13745e-10	-6.40984e-10	-1.10565e-09	-6.38967e-10	-3.95681e-10	-2.25116e-10	-9.47418e-10	-5.59445e-10	-1.13742e-09	-4.77615e-10	-3.90599e-10	-4.69772e-10	-7.57736e-10	-2.59614e-10	-2.82125e-10	-1.60325e-09	-2.72134e-10	-1.0564e-09
-6.60057e-10	-4.64907e-10	-5.86968e-10	-8.88038e-10	-5.60779e-10	-3.83837e-10	-1.53818e-09	-6.14881e-10	-6.41895e-10	-1.10698e-09	-6.3949e-10	-3.96046e-10	-2.25323e-10	-9.48429e-10	-5.59905e-10	-1.13878e-09	-4.78169e-10	-3.90998e-10	-4.70352e-10	-7.58702e-10	-2.59767e-10	-2.82404e-10	-1.60521e-09	-2.72288e-10	-1.05765e-09
-6.60802e-10	-4.65446e-10	-5.87598e-10	-8.88917e-10	-5.61414e-10	-3.84283e-10	-1.54e-09	-6.15954e-10	-6.42876e-10	-1.10832e-09	-6.40053e-10	-3.96453e-10	-2.25509e-10	-9.4938e-10	-5.60363e-10	-1.14016e-09	-4.78702e-10	-3.91387e-10	-4.70917e-10	-7.59687e-10	-2.59951e-10	-2.82682e-10	-1.60713e-09	-2.72447e-10	-1.05887e-09
-6.61502e-10	-4.65973e-10	-5.88219e-10	-8.89785e-10	-5.62046e-10	-3.84724e-10	-1.54182e-09	-6.16941e-10	-6.43874e-10	-1.10972e-09	-6.40608e-10	-3.96841e-10	-2.25719e-10	-9.50234e-10	-5.6087e-10	-1.14155e-09	-4.79226e-10	-3.91788e-10	-4.71484e-10	-7.60694e-10	-2.60177e-10	-2.82963e-10	-1.60898e-09	-2.72625e-10	-1.06006e-09
-6.62175e-10	-4.6652e-10	-5.88839e-10	-8.90679e-10	-5.62706e-10	-3.85172e-10	-1.54361e-09	-6.17886e-10	-6.44793e-10	-1.11112e-09	-6.41148e-10	-3.97219e-10	-2.25953e-10	-9.51055e-10	-5.61403e-10	-1.14293e-09	-4.79738e-10	-3.92201e-10	-4.72074e-10	-7.61736e-10	-2.60432e-10	-2.83275e-10	-1.61088e-09	-2.72797e-10	-1.06122e-09
-6.62859e-10	-4.6708e-10	-5.89485e-10	-8.91577e-10	-5.63385e-10	-3.85634e-10	-1.54539e-09	-6.18814e-10	-6.45686e-10	-1.11252e-09	-6.41698e-10	-3.97613e-10	-2.26204e-10	-9.51924e-10	-5.61961e-10	-1.14431e-09	-4.80254e-10	-3.9264e-10	-4.72674e-10	-7.62771e-10	-2.60713e-10	-2.83633e-10	-1.61285e-09	-2.72943e-10	-1.06237e-09
-6.63559e-10	-4.67654e-10	-5.90157e-10	-8.92479e-10	-5.64083e-10	-3.86109e-10	-1.54714e-09	-6.19727e-10	-6.46557e-10	-1.11391e-09	-6.42259e-10	-3.98025e-10	-2.26471e-10	-9.52847e-10	-5.62544e-10	-1.14569e-09	-4.80774e-10	-3.93106e-10	-4.73284e-10	-7.63798e-10	-2.6102e-10	-2.84038e-10	-1.61489e-09	-2.73073e-10	-1.06351e-09
-6.64272e-10	-4.68242e-10	-5.90855e-10	-8.93385e-10	-5.64798e-10	-3.86599e-10	-1.54887e-09	-6.20623e-10	-6.47406e-10	-1.1153e-09	-6.4283e-10	-3.98455e-10	-2.26753e-10	-9.53824e-10	-5.63154e-10	-1.14707e-09	-4.81298e-10	-3.93599e-10	-4.73904e-10	-7.64816e-10	-2.61355e-10	-2.84489e-10	-1.617e-09	-2.73214e-10	-1.06467e-09
-6.65e-10	-4.68843e-10	-5.91579e-10	-8.94294e-10	-5.65531e-10	-3.87102e-10	-1.55058e-09	-6.21503e-10	-6.48232e-10	-1.11669e-09	-6.43411e-10	-3.98903e-10	-2.27051e-10	-9.54855e-10	-5.63789e-10	-1.14845e-09	-4.81827e-10	-3.94119e-10	-4.74534e-10	-7.65825e-10	-2.61716e-10	-2.84987e-10	-1.61918e-09	-2.73398e-10	-1.06589e-09
-6.65743e-10	-4.69458e-10	-5.92329e-10	-8.95207e-10	-5.66283e-10	-3.87619e-10	-1.55227e-09	-6.22367e-10	-6.49037e-10	-1.11807e-09	-6.44003e-10	-3.99369e-10	-2.27366e-10	-9.5594e-10	-5.6445e-10	-1.14984e-09	-4.82361e-10	-3.94665e-10	-4.75173e-10	-7.66825e-10	-2.62104e-10	-2.85531e-10	-1.62144e-09	-2.73625e-10	-1.06711e-09
-6.665e-10	-4.70087e-10	-5.93106e-10	-8.96123e-10	-5.67053e-10	-3.88149e-10	-1.55393e-09	-6.23215e-10	-6.49819e-10	-1.11945e-09	-6.44606e-10	-3.99853e-10	-2.27696e-10	-9.57079e-10	-5.65137e-10	-1.15122e-09	-4.82898e-10	-3.95238e-10	-4.75823e-10	-7.67816e-10	-2.62519e-10	-2.86122e-10	-1.62377e-09	-2.73895e-10	-1.06833e-09
-6.67271e-10	-4.7073e-10	-5.93909e-10	-8.97042e-10	-5.67842e-10	-3.88694e-10	-1.55558e-09	-6.24047e-10	-6.5058e-10	-1.12083e-09	-6.45219e-10	-4.00355e-10	-2.28043e-10	-9.58272e-10	-5.65849e-10	-1.15261e-09	-4.8344e-10	-3.95838e-10	-4.76483e-10	-7.68799e-10	-2.6296e-10	-2.8676e-10	-1.62617e-09	-2.74208e-10	-1.06955e-09
-6.68057e-10	-4.71386e-10	-5.94738e-10	-8.97966e-10	-5.68648e-10	-3.89253e-10	-1.55721e-09	-6.24863e-10	-6.51318e-10	-1.12221e-09	-6.45842e-10	-4.00874e-10	-2.28405e-10	-9.59519e-10	-5.66588e-10	-1.154e-09	-4.83987e-10	-3.96464e-10	-4.77153e-10	-7.69772e-10	-2.63428e-10	-2.87444e-10	-1.62864e-09	-2.74565e-10	-1.07077e-09
-6.68858e-10	-4.72056e-10	-5.95593e-10	-8.98892e-10	-5.69473e-10	-3.89825e-10	-1.55882e-09	-6.25663e-10	-6.52034e-10	-1.12358e-09	-6.46477e-10	-4.01412e-10	-2.28783e-10	-9.60821e-10	-5.67351e-10	-1.15539e-09	-4.84538e-10	-3.97117e-10	-4.77832e-10	-7.70746e-10	-2.63908e-10	-2.88181e-10	-1.63116e-09	-2.74965e-10	-1.072e-09
-6.69673e-10	-4.72739e-10	-5.96474e-10	-8.99822e-10	-5.70316e-10	-3.90411e-10	-1.56041e-09	-6.26446e-10	-6.52728e-10	-1.12495e-09	-6.47121e-10	-4.01967e-10	-2.29167e-10	-9.62364e-10	-5.68106e-10	-1.15676e-09	-4.85086e-10	-3.97763e-10	-4.78504e-10	-7.71804e-10	-2.64266e-10	-2.88914e-10	-1.63347e-09	-2.7538e-10	-1.07322e-09
-6.70499e-10	-4.73442e-10	-5.97383e-10	-9.00734e-10	-5.71159e-10	-3.91025e-10	-1.56197e-09	-6.27206e-10	-6.53378e-10	-1.12631e-09	-6.47775e-10	-4.02523e-10	-2.29498e-10	-9.6453e-10	-5.68743e-10	-1.15807e-09	-4.8571e-10	-3.98367e-10	-4.79155e-10	-7.73183e-10	-2.64531e-10	-2.89521e-10	-1.63564e-09	-2.75695e-10	-1.07447e-09
-6.71298e-10	-4.74214e-10	-5.98286e-10	-9.01558e-10	-5.71919e-10	-3.91717e-10	-1.56356e-09	-6.27916e-10	-6.53927e-10	-1.12767e-09	-6.48474e-10	-4.03013e-10	-2.29784e-10	-9.66721e-10	-5.69334e-10	-1.1594e-09	-4.86431e-10	-3.98973e-10	-4.79805e-10	-7.74806e-10	-2.6481e-10	-2.9009e-10	-1.63776e-09	-2.75963e-10	-1.07583e-09
-6.72101e-10	-4.75062e-10	-5.99145e-10	-9.02352e-10	-5.72618e-10	-3.92408e-10	-1.56535e-09	-6.28581e-10	-6.54424e-10	-1.12903e-09	-6.49209e-10	-4.03446e-10	-2.30079e-10	-9.6868e-10	-5.69936e-10	-1.16081e-09	-4.87186e-10	-3.99614e-10	-4.80435e-10	-7.76392e-10	-2.65043e-10	-2.90621e-10	-1.63991e-09	-2.76204e-10	-1.07726e-09
-6.72903e-10	-4.75856e-10	-6.00042e-10	-9.03136e-10	-5.733e-10	-3.93078e-10	-1.56742e-09	-6.29273e-10	-6.54907e-10	-1.13047e-09	-6.49945e-10	-4.03837e-10	-2.30348e-10	-9.70358e-10	-5.70542e-10	-1.16229e-09	-4.87918e-10	-4.00246e-10	-4.81079e-10	-7.77901e-10	-2.65221e-10	-2.9108e-10	-1.64204e-09	-2.76427e-10	-1.07871e-09
-6.73676e-10	-4.76605e-10	-6.00971e-10	-9.03973e-10	-5.73947e-10	-3.93737e-10	-1.56975e-09	-6.30077e-10	-6.55374e-10	-1.13195e-09	-6.50632e-10	-4.04192e-10	-2.30642e-10	-9.71947e-10	-5.7111e-10	-1.16379e-09	-4.88622e-10	-4.00864e-10	-4.8172e-10	-7.79277e-10	-2.65386e-10	-2.91517e-10	-1.64409e-09	-2.76645e-10	-1.08019e-09
-6.74422e-10	-4.77318e-10	-6.01859e-10	-9.04867e-10	-5.74584e-10	-3.94369e-10	-1.5722e-09	-6.31018e-10	-6.55789e-10	-1.13337e-09	-6.5125e-10	-4.04521e-10	-2.30959e-10	-9.7345e-10	-5.71715e-10	-1.16524e-09	-4.8937e-10	-4.01441e-10	-4.82439e-10	-7.80559e-10	-2.65523e-10	-2.91918e-10	-1.64599e-09	-2.76871e-10	-1.08168e-09
-6.75142e-10	-4.77984e-10	-6.02638e-10	-9.05803e-10	-5.75212e-10	-3.94979e-10	-1.57456e-09	-6.3216e-10	-6.56171e-10	-1.13477e-09	-6.51833e-10	-4.04855e-10	-2.31273e-10	-9.74844e-10	-5.72341e-10	-1.16665e-09	-4.89988e-10	-4.0198e-10	-4.83157e-10	-7.81801e-10	-2.6563e-10	-2.92298e-10	-1.64783e-09	-2.77076e-10	-1.08315e-09
-6.75899e-10	-4.78584e-10	-6.03311e-10	-9.06803e-10	-5.75839e-10	-3.95564e-10	-1.57679e-09	-6.33415e-10	-6.56548e-10	-1.13617e-09	-6.52367e-10	-4.05227e-10	-2.31572e-10	-9.76132e-10	-5.72942e-10	-1.16802e-09	-4.90575e-10	-4.02472e-10	-4.83839e-10	-7.82958e-10	-2.65712e-10	-2.92652e-10	-1.6496e-09	-2.7726e-10	-1.08457e-09
-6.76701e-10	-4.79159e-10	-6.03915e-10	-9.07856e-10	-5.76449e-10	-3.96146e-10	-1.57896e-09	-6.34699e-10	-6.56933e-10	-1.13761e-09	-6.52868e-10	-4.05616e-10	-2.31846e-10	-9.77352e-10	-5.73543e-10	-1.16937e-09	-4.91116e-10	-4.0294e-10	-4.84487e-10	-7.84028e-10	-2.6581e-10	-2.92991e-10	-1.65139e-09	-2.77427e-10	-1.08598e-09
-6.77501e-10	-4.79782e-10	-6.04494e-10	-9.08908e-10	-5.77063e-10	-3.96718e-10	-1.58104e-09	-6.36008e-10	-6.5732e-10	-1.13902e-09	-6.53348e-10	-4.06042e-10	-2.32129e-10	-9.78455e-10	-5.74169e-10	-1.17068e-09	-4.91595e-10	-4.03398e-10	-4.85097e-10	-7.85078e-10	-2.65928e-10	-2.93294e-10	-1.65322e-09	-2.77571e-10	-1.08735e-09
-6.78233e-10	-4.80404e-10	-6.05093e-10	-9.09898e-10	-5.77686e-10	-3.9728e-10	-1.58304e-09	-6.37299e-10	-6.57745e-10	-1.14033e-09	-6.53821e-10	-4.06433e-10	-2.32428e-10	-9.79426e-10	-5.748e-10	-1.172e-09	-4.92055e-10	-4.03837e-10	-4.85708e-10	-7.8612e-10	-2.66054e-10	-2.93573e-10	-1.65503e-09	-2.77711e-10	-1.08867e-09
-6.789e-10	-4.80947e-10	-6.05735e-10	-9.10858e-10	-5.78308e-10	-3.978e-10	-1.58509e-09	-6.38559e-10	-6.58143e-10	-1.14156e-09	-6.54298e-10	-4.06772e-10	-2.3271e-10	-9.80318e-10	-5.75421e-10	-1.17333e-09	-4.92558e-10	-4.04244e-10	-4.86294e-10	-7.87173e-10	-2.66189e-10	-2.93851e-10	-1.65689e-09	-2.77848e-10	-1.08997e-09
-6.79515e-10	-4.8146e-10	-6.0638e-10	-9.11829e-10	-5.78909e-10	-3.98288e-10	-1.58703e-09	-6.39739e-10	-6.58519e-10	-1.14268e-09	-6.54803e-10	-4.07067e-10	-2.3298e-10	-9.81183e-10	-5.7604e-10	-1.1747e-09	-4.93082e-10	-4.04626e-10	-4.86847e-10	-7.88199e-10	-2.66304e-10	-2.94123e-10	-1.6588e-09	-2.77982e-10	-1.09127e-09
-6.80108e-10	-4.81961e-10	-6.07075e-10	-9.12773e-10	-5.79471e-10	-3.98732e-10	-1.58879e-09	-6.40842e-10	-6.58873e-10	-1.14375e-09	-6.5536e-10	-4.07335e-10	-2.33249e-10	-9.82018e-10	-5.76683e-10	-1.17605e-09	-4.93661e-10	-4.04993e-10	-4.87377e-10	-7.89213e-10	-2.66425e-10	-2.94391e-10	-1.66079e-09	-2.78116e-10	-1.09255e-09
-6.80698e-10	-4.82442e-10	-6.07777e-10	-9.13685e-10	-5.80037e-10	-3.99168e-10	-1.59053e-09	-6.41897e-10	-6.59231e-10	-1.14481e-09	-6.55934e-10	-4.07615e-10	-2.33552e-10	-9.82889e-10	-5.7734e-10	-1.17742e-09	-4.94273e-10	-4.0537e-10	-4.87913e-10	-7.90262e-10	-2.66568e-10	-2.94665e-10	-1.66286e-09	-2.78252e-10	-1.09384e-09
-6.81309e-10	-4.82926e-10	-6.08476e-10	-9.14587e-10	-5.8062e-10	-3.99611e-10	-1.59227e-09	-6.42928e-10	-6.5961e-10	-1.14589e-09	-6.5652e-10	-4.07927e-10	-2.33868e-10	-9.83815e-10	-5.78005e-10	-1.17879e-09	-4.9489e-10	-4.05775e-10	-4.88467e-10	-7.9132e-10	-2.66748e-10	-2.94988e-10	-1.66499e-09	-2.78389e-10	-1.09509e-09
-6.81942e-10	-4.83417e-10	-6.09171e-10	-9.15479e-10	-5.81223e-10	-4.00063e-10	-1.594e-09	-6.43935e-10	-6.60009e-10	-1.14701e-09	-6.57115e-10	-4.08272e-10	-2.34192e-10	-9.84796e-10	-5.78681e-10	-1.18018e-09	-4.95511e-10	-4.06211e-10	-4.89039e-10	-7.92386e-10	-2.66966e-10	-2.9536e-10	-1.66717e-09	-2.7853e-10	-1.09629e-09
-6.82597e-10	-4.83914e-10	-6.09862e-10	-9.16361e-10	-5.81845e-10	-4.00522e-10	-1.59572e-09	-6.4492e-10	-6.60429e-10	-1.14815e-09	-6.57722e-10	-4.08651e-10	-2.34525e-10	-9.85832e-10	-5.79369e-10	-1.18158e-09	-4.96135e-10	-4.06676e-10	-4.89628e-10	-7.93458e-10	-2.67222e-10	-2.95782e-10	-1.6694e-09	-2.78674e-10	-1.09747e-09
-6.83274e-10	-4.84416e-10	-6.1055e-10	-9.17234e-10	-5.82486e-10	-4.0099e-10	-1.59744e-09	-6.45881e-10	-6.60869e-10	-1.14932e-09	-6.58338e-10	-4.09064e-10	-2.34868e-10	-9.86923e-10	-5.80068e-10	-1.18299e-09	-4.96764e-10	-4.07172e-10	-4.90234e-10	-7.94536e-10	-2.67517e-10	-2.96253e-10	-1.67168e-09	-2.78856e-10	-1.09863e-09
-6.83972e-10	-4.84924e-10	-6.11235e-10	-9.18098e-10	-5.83145e-10	-4.01467e-10	-1.59916e-09	-6.4682e-10	-6.6133e-10	-1.15051e-09	-6.58966e-10	-4.0951e-10	-2.35219e-10	-9.88068e-10	-5.80779e-10	-1.18441e-09	-4.97397e-10	-4.07698e-10	-4.90858e-10	-7.95621e-10	-2.67849e-10	-2.96773e-10	-1.67402e-09	-2.79078e-10	-1.09981e-09
-6.84693e-10	-4.85437e-10	-6.11916e-10	-9.18951e-10	-5.83824e-10	-4.01951e-10	-1.60087e-09	-6.47736e-10	-6.61812e-10	-1.15173e-09	-6.59604e-10	-4.0999e-10	-2.35579e-10	-9.89268e-10	-5.815e-10	-1.18585e-09	-4.98033e-10	-4.08254e-10	-4.91499e-10	-7.96713e-10	-2.6822e-10	-2.97342e-10	-1.6764e-09	-2.7934e-10	-1.10103e-09
-6.85436e-10	-4.85957e-10	-6.12594e-10	-9.19795e-10	-5.84521e-10	-4.02444e-10	-1.60258e-09	-6.48629e-10	-6.62314e-10	-1.15298e-09	-6.60253e-10	-4.10503e-10	-2.35948e-10	-9.90523e-10	-5.82234e-10	-1.18729e-09	-4.98674e-10	-4.08841e-10	-4.92158e-10	-7.97812e-10	-2.68628e-10	-2.97961e-10	-1.67884e-09	-2.79642e-10	-1.10229e-09
-6.86201e-10	-4.86481e-10	-6.13269e-10	-9.2063e-10	-5.85237e-10	-4.02945e-10	-1.60428e-09	-6.49499e-10	-6.62837e-10	-1.15425e-09	-6.60913e-10	-4.1105e-10	-2.36327e-10	-9.91832e-10	-5.82978e-10	-1.18875e-09	-4.99319e-10	-4.09458e-10	-4.92834e-10	-7.98917e-10	-2.69075e-10	-2.98629e-10	-1.68133e-09	-2.79984e-10	-1.10359e-09
-6.86987e-10	-4.87012e-10	-6.1394e-10	-9.21455e-10	-5.85972e-10	-4.03454e-10	-1.60598e-09	-6.50346e-10	-6.6338e-10	-1.15555e-09	-6.61583e-10	-4.1163e-10	-2.36714e-10	-9.93197e-10	-5.83734e-10	-1.19022e-09	-4.99967e-10	-4.10105e-10	-4.93527e-10	-8.00027e-10	-2.69543e-10	-2.99346e-10	-1.68386e-09	-2.80366e-10	-1.10493e-09
-6.87796e-10	-4.87549e-10	-6.14607e-10	-9.2227e-10	-5.86726e-10	-4.03972e-10	-1.60767e-09	-6.5117e-10	-6.63944e-10	-1.15688e-09	-6.62264e-10	-4.12244e-10	-2.37098e-10	-9.94763e-10	-5.84467e-10	-1.1917e-09	-5.00657e-10	-4.10752e-10	-4.94213e-10	-8.01172e-10	-2.69894e-10	-3.00046e-10	-1.68632e-09	-2.80772e-10	-1.10629e-09
-6.88623e-10	-4.88096e-10	-6.15277e-10	-9.23071e-10	-5.87473e-10	-4.04506e-10	-1.60936e-09	-6.51973e-10	-6.64533e-10	-1.15821e-09	-6.62951e-10	-4.12875e-10	-2.37433e-10	-9.96802e-10	-5.85111e-10	-1.19316e-09	-5.01574e-10	-4.1133e-10	-4.94847e-10	-8.02463e-10	-2.70147e-10	-3.00673e-10	-1.68867e-09	-2.81135e-10	-1.10768e-09
-6.89441e-10	-4.88755e-10	-6.15962e-10	-9.23853e-10	-5.88123e-10	-4.05081e-10	-1.61106e-09	-6.5275e-10	-6.65253e-10	-1.15948e-09	-6.63607e-10	-4.13454e-10	-2.37732e-10	-9.98874e-10	-5.85728e-10	-1.19451e-09	-5.02526e-10	-4.1189e-10	-4.95442e-10	-8.03914e-10	-2.70347e-10	-3.01239e-10	-1.6911e-09	-2.81435e-10	-1.10908e-09
-6.90248e-10	-4.89588e-10	-6.1663e-10	-9.24637e-10	-5.88738e-10	-4.05655e-10	-1.61281e-09	-6.53495e-10	-6.66133e-10	-1.16068e-09	-6.6428e-10	-4.13971e-10	-2.37992e-10	-1.00069e-09	-5.86305e-10	-1.19583e-09	-5.03445e-10	-4.1243e-10	-4.9604e-10	-8.05491e-10	-2.70555e-10	-3.01771e-10	-1.69344e-09	-2.81684e-10	-1.11059e-09
-6.91073e-10	-4.90367e-10	-6.17254e-10	-9.25431e-10	-5.89327e-10	-4.06261e-10	-1.61467e-09	-6.54262e-10	-6.67188e-10	-1.16182e-09	-6.64971e-10	-4.14404e-10	-2.38223e-10	-1.00237e-09	-5.86877e-10	-1.19718e-09	-5.043e-10	-4.12919e-10	-4.96666e-10	-8.07035e-10	-2.70758e-10	-3.02231e-10	-1.69572e-09	-2.81904e-10	-1.11215e-09
-6.91895e-10	-4.91142e-10	-6.178e-10	-9.26298e-10	-5.8989e-10	-4.06866e-10	-1.6165e-09	-6.5509e-10	-6.68442e-10	-1.16294e-09	-6.65617e-10	-4.14782e-10	-2.38437e-10	-1.00392e-09	-5.87428e-10	-1.19854e-09	-5.0511e-10	-4.13409e-10	-4.97297e-10	-8.08511e-10	-2.7099e-10	-3.02634e-10	-1.69785e-09	-2.82117e-10	-1.11373e-09
-6.92715e-10	-4.91929e-10	-6.18293e-10	-9.27224e-10	-5.90392e-10	-4.07412e-10	-1.61828e-09	-6.56041e-10	-6.69835e-10	-1.16406e-09	-6.66208e-10	-4.1512e-10	-2.38631e-10	-1.00528e-09	-5.87956e-10	-1.19997e-09	-5.05948e-10	-4.13878e-10	-4.97866e-10	-8.09898e-10	-2.71289e-10	-3.03009e-10	-1.69983e-09	-2.82297e-10	-1.11528e-09
-6.93515e-10	-4.92646e-10	-6.18761e-10	-9.28188e-10	-5.90878e-10	-4.07917e-10	-1.62005e-09	-6.57094e-10	-6.71216e-10	-1.16513e-09	-6.66778e-10	-4.15432e-10	-2.38832e-10	-1.00643e-09	-5.8844e-10	-1.20145e-09	-5.06719e-10	-4.14309e-10	-4.98401e-10	-8.11213e-10	-2.7157e-10	-3.03359e-10	-1.7018e-09	-2.82444e-10	-1.1168e-09
-6.94247e-10	-4.93291e-10	-6.19261e-10	-9.29147e-10	-5.91383e-10	-4.08383e-10	-1.6218e-09	-6.58175e-10	-6.72688e-10	-1.16613e-09	-6.67317e-10	-4.15746e-10	-2.39056e-10	-1.00751e-09	-5.88929e-10	-1.20296e-09	-5.07461e-10	-4.14698e-10	-4.98897e-10	-8.12446e-10	-2.71792e-10	-3.03693e-10	-1.70379e-09	-2.82569e-10	-1.11827e-09
-6.9494e-10	-4.93895e-10	-6.19784e-10	-9.30083e-10	-5.91884e-10	-4.08827e-10	-1.62355e-09	-6.59297e-10	-6.74146e-10	-1.16709e-09	-6.67867e-10	-4.16068e-10	-2.3928e-10	-1.00855e-09	-5.89458e-10	-1.20443e-09	-5.08138e-10	-4.15077e-10	-4.99399e-10	-8.13665e-10	-2.71969e-10	-3.04005e-10	-1.70579e-09	-2.82688e-10	-1.11965e-09
-6.95605e-10	-4.94501e-10	-6.20321e-10	-9.31016e-10	-5.92397e-10	-4.09257e-10	-1.6253e-09	-6.60431e-10	-6.75493e-10	-1.16814e-09	-6.68453e-10	-4.1639e-10	-2.39484e-10	-1.00949e-09	-5.89974e-10	-1.2058e-09	-5.08816e-10	-4.15456e-10	-4.99934e-10	-8.14857e-10	-2.72118e-10	-3.04298e-10	-1.70772e-09	-2.82796e-10	-1.121e-09
-6.9625e-10	-4.95091e-10	-6.20852e-10	-9.31947e-10	-5.92896e-10	-4.09688e-10	-1.627e-09	-6.61525e-10	-6.7667e-10	-1.16927e-09	-6.69043e-10	-4.16743e-10	-2.39693e-10	-1.01042e-09	-5.90461e-10	-1.2071e-09	-5.09501e-10	-4.15819e-10	-5.00459e-10	-8.16049e-10	-2.72242e-10	-3.04569e-10	-1.70964e-09	-2.82908e-10	-1.12241e-09
-6.96866e-10	-4.95697e-10	-6.21346e-10	-9.3286e-10	-5.93375e-10	-4.101e-10	-1.62873e-09	-6.62561e-10	-6.77676e-10	-1.1704e-09	-6.69556e-10	-4.17108e-10	-2.39895e-10	-1.01132e-09	-5.90931e-10	-1.20835e-09	-5.10107e-10	-4.16168e-10	-5.00973e-10	-8.1722e-10	-2.72353e-10	-3.04855e-10	-1.71154e-09	-2.8302e-10	-1.12381e-09
-6.97562e-10	-4.96281e-10	-6.21836e-10	-9.33777e-10	-5.93866e-10	-4.10495e-10	-1.63053e-09	-6.63591e-10	-6.78527e-10	-1.17153e-09	-6.7004e-10	-4.17471e-10	-2.40108e-10	-1.01216e-09	-5.91388e-10	-1.20956e-09	-5.10616e-10	-4.16548e-10	-5.01463e-10	-8.18308e-10	-2.72468e-10	-3.05135e-10	-1.71346e-09	-2.83137e-10	-1.12522e-09
-6.98277e-10	-4.96835e-10	-6.2237e-10	-9.34724e-10	-5.94372e-10	-4.1087e-10	-1.63241e-09	-6.64629e-10	-6.79275e-10	-1.1727e-09	-6.7056e-10	-4.17798e-10	-2.40305e-10	-1.01295e-09	-5.9185e-10	-1.21078e-09	-5.11075e-10	-4.16936e-10	-5.01943e-10	-8.19378e-10	-2.72596e-10	-3.05425e-10	-1.71539e-09	-2.83249e-10	-1.12661e-09
-6.98949e-10	-4.97395e-10	-6.2296e-10	-9.35659e-10	-5.94902e-10	-4.11246e-10	-1.63427e-09	-6.65618e-10	-6.79993e-10	-1.17391e-09	-6.71053e-10	-4.18113e-10	-2.40495e-10	-1.01376e-09	-5.92311e-10	-1.21204e-09	-5.11492e-10	-4.17326e-10	-5.02426e-10	-8.20434e-10	-2.72747e-10	-3.05757e-10	-1.71731e-09	-2.83368e-10	-1.12801e-09
-6.99634e-10	-4.97959e-10	-6.23554e-10	-9.36582e-10	-5.9546e-10	-4.11629e-10	-1.63611e-09	-6.66585e-10	-6.80707e-10	-1.17515e-09	-6.71541e-10	-4.18441e-10	-2.40706e-10	-1.01463e-09	-5.92797e-10	-1.21332e-09	-5.1191e-10	-4.1774e-10	-5.02931e-10	-8.21491e-10	-2.72933e-10	-3.0613e-10	-1.71929e-09	-2.835e-10	-1.12941e-09
-7.00335e-10	-4.98528e-10	-6.24149e-10	-9.37494e-10	-5.96045e-10	-4.12019e-10	-1.63793e-09	-6.67533e-10	-6.81418e-10	-1.17641e-09	-6.72027e-10	-4.18781e-10	-2.4094e-10	-1.01556e-09	-5.9331e-10	-1.21463e-09	-5.1233e-10	-4.18179e-10	-5.03461e-10	-8.22552e-10	-2.73155e-10	-3.06546e-10	-1.72131e-09	-2.83632e-10	-1.13074e-09
-7.01052e-10	-4.99101e-10	-6.24745e-10	-9.38395e-10	-5.96656e-10	-4.12416e-10	-1.63974e-09	-6.6846e-10	-6.82125e-10	-1.17769e-09	-6.72511e-10	-4.19133e-10	-2.41197e-10	-1.01655e-09	-5.93848e-10	-1.21596e-09	-5.12753e-10	-4.18644e-10	-5.04015e-10	-8.23617e-10	-2.73412e-10	-3.07003e-10	-1.72339e-09	-2.83771e-10	-1.13203e-09
-7.01786e-10	-4.99678e-10	-6.25342e-10	-9.39285e-10	-5.97295e-10	-4.12821e-10	-1.64152e-09	-6.69368e-10	-6.8283e-10	-1.179e-09	-6.72993e-10	-4.19499e-10	-2.41477e-10	-1.0176e-09	-5.94413e-10	-1.21732e-09	-5.13179e-10	-4.19133e-10	-5.04593e-10	-8.24684e-10	-2.73704e-10	-3.07503e-10	-1.72552e-09	-2.83946e-10	-1.13329e-09
-7.02537e-10	-5.00259e-10	-6.2594e-10	-9.40165e-10	-5.9796e-10	-4.13234e-10	-1.64329e-09	-6.70256e-10	-6.83531e-10	-1.18034e-09	-6.73473e-10	-4.19877e-10	-2.4178e-10	-1.01871e-09	-5.95004e-10	-1.21871e-09	-5.13609e-10	-4.19648e-10	-5.05195e-10	-8.25755e-10	-2.74033e-10	-3.08045e-10	-1.7277e-09	-2.84161e-10	-1.13454e-09
-7.03304e-10	-5.00844e-10	-6.26539e-10	-9.41034e-10	-5.98652e-10	-4.13654e-10	-1.64503e-09	-6.71124e-10	-6.84229e-10	-1.1817e-09	-6.7395e-10	-4.20267e-10	-2.42105e-10	-1.01989e-09	-5.95621e-10	-1.22012e-09	-5.14041e-10	-4.20188e-10	-5.05822e-10	-8.26829e-10	-2.74396e-10	-3.08629e-10	-1.72994e-09	-2.84416e-10	-1.13581e-09
-7.04087e-10	-5.01433e-10	-6.27139e-10	-9.41892e-10	-5.99371e-10	-4.14081e-10	-1.64676e-09	-6.71972e-10	-6.84924e-10	-1.18308e-09	-6.74426e-10	-4.2067e-10	-2.42454e-10	-1.02112e-09	-5.96264e-10	-1.22156e-09	-5.14476e-10	-4.20753e-10	-5.06472e-10	-8.27906e-10	-2.74796e-10	-3.09254e-10	-1.73222e-09	-2.84711e-10	-1.13709e-09
-7.04887e-10	-5.02026e-10	-6.27739e-10	-9.4274e-10	-6.00117e-10	-4.14515e-10	-1.64847e-09	-6.72801e-10	-6.85615e-10	-1.18449e-09	-6.749e-10	-4.21086e-10	-2.42825e-10	-1.02242e-09	-5.96934e-10	-1.22303e-09	-5.14914e-10	-4.21343e-10	-5.07147e-10	-8.28986e-10	-2.75231e-10	-3.09922e-10	-1.73456e-09	-2.85045e-10	-1.13838e-09
-7.05704e-10	-5.02624e-10	-6.2834e-10	-9.43577e-10	-6.0089e-10	-4.14957e-10	-1.65017e-09	-6.73609e-10	-6.86303e-10	-1.18593e-09	-6.75371e-10	-4.21514e-10	-2.43219e-10	-1.02378e-09	-5.9763e-10	-1.22452e-09	-5.15355e-10	-4.21958e-10	-5.07847e-10	-8.30073e-10	-2.75695e-10	-3.10631e-10	-1.73693e-09	-2.8542e-10	-1.13969e-09
-7.06537e-10	-5.03225e-10	-6.28943e-10	-9.44402e-10	-6.0169e-10	-4.15406e-10	-1.65184e-09	-6.74399e-10	-6.86988e-10	-1.18739e-09	-6.75841e-10	-4.21955e-10	-2.43632e-10	-1.02535e-09	-5.98327e-10	-1.22604e-09	-5.15823e-10	-4.22581e-10	-5.08539e-10	-8.31257e-10	-2.76083e-10	-3.11334e-10	-1.73912e-09	-2.85817e-10	-1.141e-09
-7.07378e-10	-5.03821e-10	-6.2955e-10	-9.45206e-10	-6.02507e-10	-4.15873e-10	-1.65351e-09	-6.7516e-10	-6.87655e-10	-1.18886e-09	-6.76313e-10	-4.22408e-10	-2.4405e-10	-1.02748e-09	-5.98994e-10	-1.22759e-09	-5.16497e-10	-4.23189e-10	-5.09171e-10	-8.32631e-10	-2.76387e-10	-3.1194e-10	-1.74128e-09	-2.86113e-10	-1.14234e-09
-7.08209e-10	-5.0445e-10	-6.30179e-10	-9.45952e-10	-6.03292e-10	-4.16409e-10	-1.65516e-09	-6.75864e-10	-6.88214e-10	-1.19025e-09	-6.76782e-10	-4.22889e-10	-2.44418e-10	-1.02965e-09	-5.99674e-10	-1.22908e-09	-5.17263e-10	-4.23838e-10	-5.09809e-10	-8.34081e-10	-2.76665e-10	-3.12488e-10	-1.74357e-09	-2.86337e-10	-1.14375e-09
-7.09083e-10	-5.05202e-10	-6.30763e-10	-9.46679e-10	-6.0403e-10	-4.17044e-10	-1.65678e-09	-6.7656e-10	-6.8867e-10	-1.19154e-09	-6.77275e-10	-4.23377e-10	-2.44717e-10	-1.03159e-09	-6.0037e-10	-1.23049e-09	-5.18032e-10	-4.24429e-10	-5.10426e-10	-8.35531e-10	-2.76927e-10	-3.12985e-10	-1.74578e-09	-2.86544e-10	-1.14516e-09
-7.09921e-10	-5.06031e-10	-6.31283e-10	-9.47402e-10	-6.04727e-10	-4.17722e-10	-1.65839e-09	-6.7729e-10	-6.89078e-10	-1.19279e-09	-6.77803e-10	-4.23799e-10	-2.44983e-10	-1.0334e-09	-6.01054e-10	-1.23187e-09	-5.1877e-10	-4.24966e-10	-5.11024e-10	-8.36901e-10	-2.77127e-10	-3.13448e-10	-1.74789e-09	-2.86758e-10	-1.14658e-09
-7.10728e-10	-5.06857e-10	-6.31797e-10	-9.4813e-10	-6.05393e-10	-4.18392e-10	-1.65999e-09	-6.78082e-10	-6.89499e-10	-1.19413e-09	-6.78291e-10	-4.24182e-10	-2.45219e-10	-1.03522e-09	-6.01654e-10	-1.23334e-09	-5.19549e-10	-4.25475e-10	-5.1167e-10	-8.38318e-10	-2.77279e-10	-3.13909e-10	-1.75015e-09	-2.86964e-10	-1.148e-09
-7.11537e-10	-5.0762e-10	-6.32295e-10	-9.48849e-10	-6.06022e-10	-4.18987e-10	-1.66166e-09	-6.78995e-10	-6.89954e-10	-1.19574e-09	-6.78759e-10	-4.24577e-10	-2.45456e-10	-1.03694e-09	-6.02279e-10	-1.23478e-09	-5.20337e-10	-4.25976e-10	-5.12313e-10	-8.39804e-10	-2.77396e-10	-3.14364e-10	-1.75235e-09	-2.87158e-10	-1.14939e-09
-7.12294e-10	-5.08322e-10	-6.32768e-10	-9.49575e-10	-6.06607e-10	-4.19512e-10	-1.66348e-09	-6.8e-10	-6.90383e-10	-1.19767e-09	-6.79196e-10	-4.25003e-10	-2.45706e-10	-1.03849e-09	-6.02999e-10	-1.23614e-09	-5.21078e-10	-4.26433e-10	-5.12886e-10	-8.41237e-10	-2.77495e-10	-3.14786e-10	-1.75447e-09	-2.87341e-10	-1.15077e-09
-7.12996e-10	-5.0902e-10	-6.33241e-10	-9.50378e-10	-6.07294e-10	-4.20007e-10	-1.66542e-09	-6.81054e-10	-6.90775e-10	-1.19976e-09	-6.79617e-10	-4.25418e-10	-2.4595e-10	-1.03995e-09	-6.03666e-10	-1.23746e-09	-5.21691e-10	-4.26868e-10	-5.13456e-10	-8.4255e-10	-2.77576e-10	-3.15174e-10	-1.7565e-09	-2.87495e-10	-1.15217e-09
-7.13699e-10	-5.09705e-10	-6.33726e-10	-9.51221e-10	-6.08293e-10	-4.20496e-10	-1.66734e-09	-6.8208e-10	-6.91142e-10	-1.20178e-09	-6.80062e-10	-4.25822e-10	-2.46176e-10	-1.04127e-09	-6.04236e-10	-1.23876e-09	-5.22229e-10	-4.27284e-10	-5.14016e-10	-8.43761e-10	-2.77648e-10	-3.15545e-10	-1.75846e-09	-2.87629e-10	-1.15358e-09
-7.1446e-10	-5.10316e-10	-6.34239e-10	-9.52073e-10	-6.09416e-10	-4.2101e-10	-1.66919e-09	-6.83093e-10	-6.91481e-10	-1.20372e-09	-6.80523e-10	-4.26198e-10	-2.46376e-10	-1.04245e-09	-6.04753e-10	-1.23999e-09	-5.22733e-10	-4.2767e-10	-5.14524e-10	-8.44922e-10	-2.77711e-10	-3.15909e-10	-1.76038e-09	-2.87754e-10	-1.15502e-09
-7.15166e-10	-5.10896e-10	-6.34729e-10	-9.52893e-10	-6.10477e-10	-4.2151e-10	-1.67095e-09	-6.8406e-10	-6.91772e-10	-1.20564e-09	-6.80987e-10	-4.26517e-10	-2.46556e-10	-1.04354e-09	-6.05285e-10	-1.24121e-09	-5.2322e-10	-4.28056e-10	-5.1508e-10	-8.46012e-10	-2.77771e-10	-3.16251e-10	-1.76224e-09	-2.87896e-10	-1.15644e-09
-7.15819e-10	-5.11438e-10	-6.35171e-10	-9.53681e-10	-6.11453e-10	-4.21996e-10	-1.67261e-09	-6.85018e-10	-6.92039e-10	-1.20753e-09	-6.81454e-10	-4.26785e-10	-2.46754e-10	-1.0446e-09	-6.05828e-10	-1.24249e-09	-5.23762e-10	-4.28475e-10	-5.15651e-10	-8.47062e-10	-2.77829e-10	-3.16568e-10	-1.76415e-09	-2.88052e-10	-1.15778e-09
-7.16569e-10	-5.11952e-10	-6.35604e-10	-9.54446e-10	-6.12392e-10	-4.22504e-10	-1.67423e-09	-6.85956e-10	-6.92305e-10	-1.20941e-09	-6.81945e-10	-4.27029e-10	-2.46969e-10	-1.04562e-09	-6.06327e-10	-1.24375e-09	-5.24262e-10	-4.28874e-10	-5.1616e-10	-8.48086e-10	-2.77885e-10	-3.169e-10	-1.76605e-09	-2.88202e-10	-1.15906e-09
-7.17352e-10	-5.12461e-10	-6.36028e-10	-9.55175e-10	-6.13315e-10	-4.23022e-10	-1.67583e-09	-6.8685e-10	-6.92602e-10	-1.21115e-09	-6.82447e-10	-4.27276e-10	-2.47211e-10	-1.04651e-09	-6.06818e-10	-1.24497e-09	-5.24739e-10	-4.29261e-10	-5.16641e-10	-8.49089e-10	-2.77955e-10	-3.17216e-10	-1.76791e-09	-2.88362e-10	-1.16025e-09
-7.18126e-10	-5.12951e-10	-6.3645e-10	-9.55907e-10	-6.14205e-10	-4.23538e-10	-1.6774e-09	-6.87718e-10	-6.92937e-10	-1.21279e-09	-6.82957e-10	-4.27554e-10	-2.47485e-10	-1.04736e-09	-6.07341e-10	-1.24616e-09	-5.25234e-10	-4.29644e-10	-5.17114e-10	-8.5007e-10	-2.78038e-10	-3.17544e-10	-1.76982e-09	-2.88497e-10	-1.16139e-09
-7.18902e-10	-5.13457e-10	-6.36883e-10	-9.56649e-10	-6.15089e-10	-4.24058e-10	-1.67897e-09	-6.88575e-10	-6.93303e-10	-1.21441e-09	-6.83463e-10	-4.27871e-10	-2.47771e-10	-1.04826e-09	-6.07898e-10	-1.24738e-09	-5.25748e-10	-4.30051e-10	-5.17607e-10	-8.51054e-10	-2.78158e-10	-3.1791e-10	-1.77178e-09	-2.88617e-10	-1.16258e-09
-7.1968e-10	-5.13984e-10	-6.37328e-10	-9.574e-10	-6.15967e-10	-4.24582e-10	-1.68053e-09	-6.89422e-10	-6.93698e-10	-1.21601e-09	-6.83964e-10	-4.28225e-10	-2.48069e-10	-1.0492e-09	-6.08487e-10	-1.24863e-09	-5.26282e-10	-4.30484e-10	-5.18123e-10	-8.52045e-10	-2.78317e-10	-3.18314e-10	-1.77377e-09	-2.88733e-10	-1.16379e-09
-7.20458e-10	-5.14531e-10	-6.37785e-10	-9.58161e-10	-6.16841e-10	-4.2511e-10	-1.6821e-09	-6.90261e-10	-6.94124e-10	-1.2176e-09	-6.84461e-10	-4.28617e-10	-2.48378e-10	-1.05019e-09	-6.09109e-10	-1.24992e-09	-5.26834e-10	-4.30943e-10	-5.18661e-10	-8.53042e-10	-2.78514e-10	-3.18757e-10	-1.77581e-09	-2.88871e-10	-1.16494e-09
-7.21239e-10	-5.15097e-10	-6.38254e-10	-9.58931e-10	-6.17709e-10	-4.25642e-10	-1.68366e-09	-6.9109e-10	-6.9458e-10	-1.21916e-09	-6.84953e-10	-4.29047e-10	-2.48698e-10	-1.05123e-09	-6.09765e-10	-1.25124e-09	-5.27406e-10	-4.31429e-10	-5.19221e-10	-8.54045e-10	-2.78749e-10	-3.19237e-10	-1.7779e-09	-2.89052e-10	-1.16609e-09
-7.2202e-10	-5.15684e-10	-6.38735e-10	-9.59711e-10	-6.18573e-10	-4.26178e-10	-1.68523e-09	-6.9191e-10	-6.95066e-10	-1.22071e-09	-6.85441e-10	-4.29515e-10	-2.4903e-10	-1.05231e-09	-6.10453e-10	-1.25259e-09	-5.27997e-10	-4.3194e-10	-5.19803e-10	-8.55054e-10	-2.79022e-10	-3.19756e-10	-1.78003e-09	-2.89275e-10	-1.16726e-09
-7.22804e-10	-5.16291e-10	-6.39227e-10	-9.605e-10	-6.19431e-10	-4.26718e-10	-1.68679e-09	-6.9272e-10	-6.95582e-10	-1.22224e-09	-6.85923e-10	-4.3002e-10	-2.49373e-10	-1.05344e-09	-6.11175e-10	-1.25398e-09	-5.28608e-10	-4.32478e-10	-5.20408e-10	-8.5607e-10	-2.79333e-10	-3.20312e-10	-1.78221e-09	-2.89538e-10	-1.16846e-09
-7.23588e-10	-5.16917e-10	-6.39732e-10	-9.61298e-10	-6.20284e-10	-4.27262e-10	-1.68835e-09	-6.93521e-10	-6.96128e-10	-1.22375e-09	-6.86401e-10	-4.30564e-10	-2.49727e-10	-1.05462e-09	-6.11929e-10	-1.2554e-09	-5.29237e-10	-4.33041e-10	-5.21034e-10	-8.57091e-10	-2.79682e-10	-3.20907e-10	-1.78442e-09	-2.89842e-10	-1.16967e-09
-7.24375e-10	-5.17564e-10	-6.40248e-10	-9.62106e-10	-6.21132e-10	-4.27809e-10	-1.6899e-09	-6.94313e-10	-6.96704e-10	-1.22524e-09	-6.86874e-10	-4.31145e-10	-2.50093e-10	-1.05585e-09	-6.12717e-10	-1.25685e-09	-5.29885e-10	-4.33631e-10	-5.21683e-10	-8.58119e-10	-2.8007e-10	-3.2154e-10	-1.78669e-09	-2.90188e-10	-1.17092e-09
-7.25162e-10	-5.1823e-10	-6.40776e-10	-9.62923e-10	-6.21975e-10	-4.28361e-10	-1.69146e-09	-6.95095e-10	-6.97309e-10	-1.22672e-09	-6.87343e-10	-4.31764e-10	-2.5047e-10	-1.05712e-09	-6.13537e-10	-1.25834e-09	-5.30553e-10	-4.34247e-10	-5.22354e-10	-8.59173e-10	-2.80479e-10	-3.22213e-10	-1.78898e-09	-2.90575e-10	-1.17218e-09
-7.25951e-10	-5.18917e-10	-6.41316e-10	-9.6375e-10	-6.22813e-10	-4.28917e-10	-1.69302e-09	-6.95869e-10	-6.97945e-10	-1.22817e-09	-6.87806e-10	-4.32421e-10	-2.50855e-10	-1.05858e-09	-6.14363e-10	-1.25986e-09	-5.31264e-10	-4.34868e-10	-5.23038e-10	-8.60377e-10	-2.80758e-10	-3.22869e-10	-1.79114e-09	-2.90989e-10	-1.17346e-09
-7.26735e-10	-5.19629e-10	-6.41871e-10	-9.64583e-10	-6.23638e-10	-4.29491e-10	-1.69458e-09	-6.96628e-10	-6.98611e-10	-1.22962e-09	-6.88267e-10	-4.33107e-10	-2.51246e-10	-1.06052e-09	-6.15098e-10	-1.2614e-09	-5.3211e-10	-4.35438e-10	-5.23735e-10	-8.61824e-10	-2.81003e-10	-3.23423e-10	-1.7932e-09	-2.91334e-10	-1.17476e-09
-7.27462e-10	-5.20389e-10	-6.42427e-10	-9.65402e-10	-6.24414e-10	-4.30103e-10	-1.69625e-09	-6.97382e-10	-6.99368e-10	-1.23105e-09	-6.88739e-10	-4.33752e-10	-2.51625e-10	-1.06254e-09	-6.15755e-10	-1.26293e-09	-5.32961e-10	-4.35963e-10	-5.24385e-10	-8.63381e-10	-2.81313e-10	-3.23912e-10	-1.79519e-09	-2.91632e-10	-1.17606e-09
-7.28132e-10	-5.21229e-10	-6.42929e-10	-9.66188e-10	-6.25108e-10	-4.30704e-10	-1.69816e-09	-6.98143e-10	-7.00291e-10	-1.23238e-09	-6.89258e-10	-4.34348e-10	-2.5194e-10	-1.06451e-09	-6.16322e-10	-1.26448e-09	-5.33781e-10	-4.36451e-10	-5.24985e-10	-8.64862e-10	-2.81584e-10	-3.24344e-10	-1.79724e-09	-2.91874e-10	-1.17735e-09
-7.28811e-10	-5.22104e-10	-6.43396e-10	-9.66943e-10	-6.25727e-10	-4.3128e-10	-1.7004e-09	-6.98906e-10	-7.01459e-10	-1.23365e-09	-6.89871e-10	-4.34882e-10	-2.52202e-10	-1.06624e-09	-6.1681e-10	-1.26598e-09	-5.34565e-10	-4.36908e-10	-5.25631e-10	-8.66219e-10	-2.81825e-10	-3.24731e-10	-1.79945e-09	-2.92095e-10	-1.17872e-09
-7.29489e-10	-5.22936e-10	-6.43855e-10	-9.67676e-10	-6.26328e-10	-4.31857e-10	-1.70274e-09	-6.99753e-10	-7.02736e-10	-1.23491e-09	-6.90473e-10	-4.35338e-10	-2.52453e-10	-1.06777e-09	-6.17293e-10	-1.26739e-09	-5.35248e-10	-4.37334e-10	-5.26305e-10	-8.67498e-10	-2.8206e-10	-3.25094e-10	-1.80172e-09	-2.92298e-10	-1.1801e-09
-7.30234e-10	-5.23717e-10	-6.44298e-10	-9.68448e-10	-6.26892e-10	-4.32421e-10	-1.70503e-09	-7.00719e-10	-7.04066e-10	-1.23617e-09	-6.9107e-10	-4.35734e-10	-2.52737e-10	-1.06915e-09	-6.17789e-10	-1.26882e-09	-5.35896e-10	-4.37755e-10	-5.26946e-10	-8.68736e-10	-2.82297e-10	-3.25425e-10	-1.80381e-09	-2.92475e-10	-1.18141e-09
-7.31029e-10	-5.24435e-10	-6.44738e-10	-9.69299e-10	-6.27448e-10	-4.32945e-10	-1.70741e-09	-7.01742e-10	-7.05468e-10	-1.23745e-09	-6.91684e-10	-4.3615e-10	-2.53059e-10	-1.07038e-09	-6.18337e-10	-1.27014e-09	-5.36582e-10	-4.38196e-10	-5.27519e-10	-8.69933e-10	-2.8251e-10	-3.25753e-10	-1.80583e-09	-2.92646e-10	-1.18265e-09
-7.3182e-10	-5.25111e-10	-6.45211e-10	-9.70167e-10	-6.27994e-10	-4.33475e-10	-1.7098e-09	-7.02746e-10	-7.06866e-10	-1.2388e-09	-6.92303e-10	-4.36587e-10	-2.53357e-10	-1.07156e-09	-6.18958e-10	-1.27144e-09	-5.37251e-10	-4.38648e-10	-5.28037e-10	-8.71037e-10	-2.82682e-10	-3.26065e-10	-1.80779e-09	-2.92812e-10	-1.18387e-09
-7.32598e-10	-5.25759e-10	-6.45736e-10	-9.7102e-10	-6.28511e-10	-4.33993e-10	-1.71202e-09	-7.03728e-10	-7.08182e-10	-1.2401e-09	-6.92885e-10	-4.37016e-10	-2.53641e-10	-1.07266e-09	-6.19611e-10	-1.27275e-09	-5.37884e-10	-4.39114e-10	-5.28582e-10	-8.72122e-10	-2.82901e-10	-3.26388e-10	-1.80972e-09	-2.92974e-10	-1.18508e-09
-7.33329e-10	-5.26365e-10	-6.46222e-10	-9.71865e-10	-6.29037e-10	-4.34482e-10	-1.71421e-09	-7.04702e-10	-7.09335e-10	-1.24136e-09	-6.93471e-10	-4.37416e-10	-2.53923e-10	-1.07364e-09	-6.20225e-10	-1.27406e-09	-5.38522e-10	-4.39541e-10	-5.29142e-10	-8.73206e-10	-2.83123e-10	-3.26712e-10	-1.81177e-09	-2.93119e-10	-1.18627e-09
-7.34096e-10	-5.26936e-10	-6.46647e-10	-9.72688e-10	-6.29622e-10	-4.34955e-10	-1.71626e-09	-7.05677e-10	-7.10368e-10	-1.24268e-09	-6.94012e-10	-4.37801e-10	-2.54221e-10	-1.07456e-09	-6.20782e-10	-1.27541e-09	-5.3916e-10	-4.39927e-10	-5.29715e-10	-8.74292e-10	-2.83304e-10	-3.27006e-10	-1.8138e-09	-2.9326e-10	-1.18745e-09
-7.34901e-10	-5.27504e-10	-6.47061e-10	-9.73497e-10	-6.30197e-10	-4.35391e-10	-1.7182e-09	-7.06642e-10	-7.11293e-10	-1.24405e-09	-6.94478e-10	-4.38151e-10	-2.54512e-10	-1.07541e-09	-6.21281e-10	-1.27674e-09	-5.39805e-10	-4.4031e-10	-5.3031e-10	-8.75331e-10	-2.83456e-10	-3.27288e-10	-1.81573e-09	-2.93414e-10	-1.18862e-09
-7.35678e-10	-5.28043e-10	-6.47479e-10	-9.7428e-10	-6.30685e-10	-4.35835e-10	-1.72005e-09	-7.07562e-10	-7.12193e-10	-1.24547e-09	-6.94906e-10	-4.38467e-10	-2.54759e-10	-1.07622e-09	-6.2174e-10	-1.27801e-09	-5.40404e-10	-4.40704e-10	-5.30876e-10	-8.7638e-10	-2.8358e-10	-3.27566e-10	-1.81763e-09	-2.93558e-10	-1.18981e-09
-7.36459e-10	-5.2853e-10	-6.47875e-10	-9.7511e-10	-6.31146e-10	-4.36299e-10	-1.72179e-09	-7.08451e-10	-7.13252e-10	-1.24689e-09	-6.95344e-10	-4.38746e-10	-2.55002e-10	-1.07706e-09	-6.22189e-10	-1.27927e-09	-5.40906e-10	-4.41111e-10	-5.31398e-10	-8.77453e-10	-2.83687e-10	-3.27835e-10	-1.81962e-09	-2.93693e-10	-1.19105e-09
-7.37228e-10	-5.29014e-10	-6.48266e-10	-9.75989e-10	-6.31633e-10	-4.36771e-10	-1.72347e-09	-7.09342e-10	-7.14364e-10	-1.2483e-09	-6.95792e-10	-4.39022e-10	-2.5526e-10	-1.07792e-09	-6.22656e-10	-1.28053e-09	-5.41364e-10	-4.41507e-10	-5.3192e-10	-8.78529e-10	-2.83802e-10	-3.28113e-10	-1.82168e-09	-2.93818e-10	-1.19231e-09
-7.37998e-10	-5.29526e-10	-6.48668e-10	-9.76868e-10	-6.32142e-10	-4.37244e-10	-1.72517e-09	-7.1022e-10	-7.15445e-10	-1.24972e-09	-6.96246e-10	-4.39319e-10	-2.55537e-10	-1.07882e-09	-6.23155e-10	-1.28179e-09	-5.4183e-10	-4.41932e-10	-5.32449e-10	-8.79606e-10	-2.83947e-10	-3.28438e-10	-1.82378e-09	-2.9392e-10	-1.19354e-09
-7.38769e-10	-5.30068e-10	-6.49082e-10	-9.77746e-10	-6.32673e-10	-4.37716e-10	-1.72688e-09	-7.11083e-10	-7.16495e-10	-1.25113e-09	-6.96706e-10	-4.39641e-10	-2.55831e-10	-1.07974e-09	-6.23687e-10	-1.28306e-09	-5.42307e-10	-4.42386e-10	-5.32987e-10	-8.80681e-10	-2.84122e-10	-3.28811e-10	-1.82592e-09	-2.94043e-10	-1.19477e-09
-7.39543e-10	-5.3064e-10	-6.49507e-10	-9.78621e-10	-6.33226e-10	-4.38189e-10	-1.72859e-09	-7.11931e-10	-7.17513e-10	-1.25254e-09	-6.97173e-10	-4.39987e-10	-2.56144e-10	-1.0807e-09	-6.24252e-10	-1.28434e-09	-5.42794e-10	-4.4287e-10	-5.33532e-10	-8.81755e-10	-2.84327e-10	-3.29232e-10	-1.82809e-09	-2.94191e-10	-1.196e-09
-7.40318e-10	-5.31242e-10	-6.49942e-10	-9.79495e-10	-6.338e-10	-4.38661e-10	-1.73032e-09	-7.12764e-10	-7.185e-10	-1.25394e-09	-6.97646e-10	-4.40357e-10	-2.56474e-10	-1.08168e-09	-6.2485e-10	-1.28563e-09	-5.43291e-10	-4.43384e-10	-5.34085e-10	-8.82827e-10	-2.84563e-10	-3.297e-10	-1.8303e-09	-2.94374e-10	-1.19722e-09
-7.41096e-10	-5.31873e-10	-6.50389e-10	-9.80366e-10	-6.34395e-10	-4.39133e-10	-1.73205e-09	-7.13582e-10	-7.19455e-10	-1.25535e-09	-6.98125e-10	-4.40751e-10	-2.56824e-10	-1.08269e-09	-6.25481e-10	-1.28692e-09	-5.43798e-10	-4.43928e-10	-5.34645e-10	-8.83899e-10	-2.84829e-10	-3.30217e-10	-1.83255e-09	-2.94593e-10	-1.19847e-09
-7.41875e-10	-5.32534e-10	-6.50848e-10	-9.81237e-10	-6.35012e-10	-4.39604e-10	-1.7338e-09	-7.14385e-10	-7.20378e-10	-1.25675e-09	-6.98611e-10	-4.41169e-10	-2.57191e-10	-1.08373e-09	-6.26144e-10	-1.28822e-09	-5.44315e-10	-4.44502e-10	-5.35213e-10	-8.8497e-10	-2.85126e-10	-3.30782e-10	-1.83483e-09	-2.9485e-10	-1.19975e-09
-7.42657e-10	-5.33224e-10	-6.51317e-10	-9.82105e-10	-6.35651e-10	-4.40076e-10	-1.73555e-09	-7.15174e-10	-7.21269e-10	-1.25816e-09	-6.99103e-10	-4.41611e-10	-2.57577e-10	-1.0848e-09	-6.26841e-10	-1.28953e-09	-5.44843e-10	-4.45105e-10	-5.35789e-10	-8.86039e-10	-2.85453e-10	-3.31395e-10	-1.83715e-09	-2.95144e-10	-1.20107e-09
-7.43441e-10	-5.33944e-10	-6.51798e-10	-9.82972e-10	-6.36311e-10	-4.40547e-10	-1.73732e-09	-7.15947e-10	-7.22129e-10	-1.25956e-09	-6.99602e-10	-4.42077e-10	-2.57981e-10	-1.0859e-09	-6.2757e-10	-1.29084e-09	-5.4538e-10	-4.45739e-10	-5.36372e-10	-8.87107e-10	-2.8581e-10	-3.32055e-10	-1.83951e-09	-2.95475e-10	-1.20241e-09
-7.44227e-10	-5.34694e-10	-6.5229e-10	-9.83836e-10	-6.36993e-10	-4.41018e-10	-1.7391e-09	-7.16706e-10	-7.22958e-10	-1.26095e-09	-7.00107e-10	-4.42568e-10	-2.58403e-10	-1.08703e-09	-6.28332e-10	-1.29216e-09	-5.45928e-10	-4.46402e-10	-5.36963e-10	-8.88184e-10	-2.86192e-10	-3.32763e-10	-1.84189e-09	-2.95844e-10	-1.20379e-09
-7.45014e-10	-5.35473e-10	-6.52793e-10	-9.84699e-10	-6.37696e-10	-4.41488e-10	-1.74088e-09	-7.1745e-10	-7.23754e-10	-1.26235e-09	-7.00618e-10	-4.43082e-10	-2.58837e-10	-1.08827e-09	-6.29101e-10	-1.29347e-09	-5.46529e-10	-4.47073e-10	-5.3754e-10	-8.89365e-10	-2.86526e-10	-3.33436e-10	-1.84419e-09	-2.96236e-10	-1.20518e-09
-7.45797e-10	-5.36286e-10	-6.53305e-10	-9.85556e-10	-6.38408e-10	-4.41967e-10	-1.74267e-09	-7.18168e-10	-7.245e-10	-1.26374e-09	-7.01136e-10	-4.43607e-10	-2.59226e-10	-1.08991e-09	-6.29795e-10	-1.2948e-09	-5.47351e-10	-4.47709e-10	-5.38055e-10	-8.90736e-10	-2.86812e-10	-3.33994e-10	-1.84633e-09	-2.96536e-10	-1.20657e-09
-7.4656e-10	-5.37207e-10	-6.538e-10	-9.86376e-10	-6.39068e-10	-4.42487e-10	-1.7444e-09	-7.18809e-10	-7.25119e-10	-1.26514e-09	-7.01688e-10	-4.44073e-10	-2.59564e-10	-1.09176e-09	-6.30462e-10	-1.29616e-09	-5.48262e-10	-4.48324e-10	-5.38579e-10	-8.92295e-10	-2.87029e-10	-3.34508e-10	-1.84841e-09	-2.9678e-10	-1.20799e-09
-7.47354e-10	-5.38248e-10	-6.54267e-10	-9.87142e-10	-6.39708e-10	-4.43026e-10	-1.74608e-09	-7.19429e-10	-7.25638e-10	-1.26659e-09	-7.02285e-10	-4.44492e-10	-2.59866e-10	-1.09351e-09	-6.31071e-10	-1.29753e-09	-5.49098e-10	-4.48893e-10	-5.39129e-10	-8.9388e-10	-2.87242e-10	-3.34977e-10	-1.85058e-09	-2.96986e-10	-1.20943e-09
-7.48161e-10	-5.3924e-10	-6.54716e-10	-9.87905e-10	-6.40358e-10	-4.43558e-10	-1.7478e-09	-7.20116e-10	-7.26101e-10	-1.26801e-09	-7.02847e-10	-4.44878e-10	-2.60173e-10	-1.09513e-09	-6.31638e-10	-1.29891e-09	-5.49937e-10	-4.49417e-10	-5.39694e-10	-8.95409e-10	-2.87448e-10	-3.35384e-10	-1.85273e-09	-2.97186e-10	-1.21092e-09
-7.48961e-10	-5.40164e-10	-6.55155e-10	-9.88672e-10	-6.40988e-10	-4.44084e-10	-1.7496e-09	-7.20949e-10	-7.26575e-10	-1.26938e-09	-7.03373e-10	-4.45227e-10	-2.60458e-10	-1.09667e-09	-6.32184e-10	-1.30028e-09	-5.50891e-10	-4.49904e-10	-5.40233e-10	-8.96925e-10	-2.87622e-10	-3.35775e-10	-1.85479e-09	-2.97364e-10	-1.21243e-09
-7.49701e-10	-5.41009e-10	-6.55601e-10	-9.8949e-10	-6.41611e-10	-4.44581e-10	-1.75149e-09	-7.2197e-10	-7.27058e-10	-1.27079e-09	-7.03843e-10	-4.45551e-10	-2.60708e-10	-1.09812e-09	-6.32679e-10	-1.30172e-09	-5.51934e-10	-4.50374e-10	-5.4079e-10	-8.98344e-10	-2.87798e-10	-3.36122e-10	-1.8567e-09	-2.97514e-10	-1.21391e-09
-7.50359e-10	-5.41782e-10	-6.56049e-10	-9.90352e-10	-6.42214e-10	-4.45069e-10	-1.75338e-09	-7.23056e-10	-7.27547e-10	-1.27237e-09	-7.04255e-10	-4.45851e-10	-2.60938e-10	-1.09944e-09	-6.33129e-10	-1.30314e-09	-5.52992e-10	-4.50832e-10	-5.41336e-10	-8.99615e-10	-2.87969e-10	-3.36436e-10	-1.8586e-09	-2.97671e-10	-1.21533e-09
-7.51013e-10	-5.42475e-10	-6.56476e-10	-9.91228e-10	-6.42815e-10	-4.45561e-10	-1.75517e-09	-7.24156e-10	-7.28013e-10	-1.27415e-09	-7.04646e-10	-4.46138e-10	-2.61156e-10	-1.10078e-09	-6.33549e-10	-1.30455e-09	-5.53959e-10	-4.5127e-10	-5.41869e-10	-9.00769e-10	-2.88176e-10	-3.36733e-10	-1.86056e-09	-2.97857e-10	-1.2167e-09
-7.5169e-10	-5.43076e-10	-6.56906e-10	-9.92076e-10	-6.43422e-10	-4.46075e-10	-1.75689e-09	-7.25263e-10	-7.28451e-10	-1.27611e-09	-7.0502e-10	-4.46431e-10	-2.61347e-10	-1.10207e-09	-6.34024e-10	-1.306e-09	-5.54753e-10	-4.5168e-10	-5.42435e-10	-9.01822e-10	-2.88382e-10	-3.37042e-10	-1.86245e-09	-2.98038e-10	-1.21804e-09
-7.52363e-10	-5.43677e-10	-6.57331e-10	-9.92911e-10	-6.4397e-10	-4.46584e-10	-1.75861e-09	-7.26346e-10	-7.28893e-10	-1.27807e-09	-7.05428e-10	-4.46721e-10	-2.6153e-10	-1.10331e-09	-6.34517e-10	-1.30748e-09	-5.55401e-10	-4.52062e-10	-5.43004e-10	-9.02808e-10	-2.88539e-10	-3.37354e-10	-1.86434e-09	-2.98193e-10	-1.21939e-09
-7.5303e-10	-5.44284e-10	-6.57775e-10	-9.93708e-10	-6.44509e-10	-4.47064e-10	-1.76036e-09	-7.27372e-10	-7.29284e-10	-1.27998e-09	-7.05834e-10	-4.47014e-10	-2.617e-10	-1.10446e-09	-6.34993e-10	-1.30899e-09	-5.56036e-10	-4.52438e-10	-5.43586e-10	-9.03875e-10	-2.88674e-10	-3.37669e-10	-1.86624e-09	-2.98355e-10	-1.22072e-09
-7.53666e-10	-5.44865e-10	-6.58194e-10	-9.94462e-10	-6.45074e-10	-4.47537e-10	-1.76209e-09	-7.28353e-10	-7.29684e-10	-1.28179e-09	-7.06228e-10	-4.47309e-10	-2.61861e-10	-1.10557e-09	-6.35509e-10	-1.31052e-09	-5.56662e-10	-4.52808e-10	-5.44175e-10	-9.04968e-10	-2.88785e-10	-3.37971e-10	-1.86815e-09	-2.98526e-10	-1.22205e-09
-7.54241e-10	-5.45403e-10	-6.58579e-10	-9.95209e-10	-6.45619e-10	-4.47996e-10	-1.76378e-09	-7.2929e-10	-7.30088e-10	-1.28345e-09	-7.06599e-10	-4.47581e-10	-2.62053e-10	-1.10654e-09	-6.36013e-10	-1.31201e-09	-5.57203e-10	-4.53154e-10	-5.44764e-10	-9.05994e-10	-2.88894e-10	-3.383e-10	-1.87015e-09	-2.98682e-10	-1.22336e-09
-7.54795e-10	-5.45929e-10	-6.59011e-10	-9.95978e-10	-6.46105e-10	-4.48415e-10	-1.76537e-09	-7.30149e-10	-7.30478e-10	-1.28501e-09	-7.06981e-10	-4.47852e-10	-2.62267e-10	-1.10736e-09	-6.36499e-10	-1.31342e-09	-5.57723e-10	-4.53487e-10	-5.4532e-10	-9.06948e-10	-2.89044e-10	-3.38635e-10	-1.87213e-09	-2.98832e-10	-1.22463e-09
-7.55364e-10	-5.46442e-10	-6.59489e-10	-9.96754e-10	-6.46578e-10	-4.48813e-10	-1.7669e-09	-7.30987e-10	-7.30864e-10	-1.28655e-09	-7.07368e-10	-4.48146e-10	-2.62517e-10	-1.10813e-09	-6.36987e-10	-1.31481e-09	-5.58217e-10	-4.53836e-10	-5.45847e-10	-9.07882e-10	-2.89214e-10	-3.38989e-10	-1.87413e-09	-2.99003e-10	-1.22586e-09
-7.55952e-10	-5.46976e-10	-6.59982e-10	-9.97534e-10	-6.47072e-10	-4.49218e-10	-1.76843e-09	-7.31818e-10	-7.31262e-10	-1.28808e-09	-7.07776e-10	-4.48462e-10	-2.6279e-10	-1.10894e-09	-6.37509e-10	-1.3162e-09	-5.58719e-10	-4.54212e-10	-5.46386e-10	-9.08815e-10	-2.89418e-10	-3.39374e-10	-1.87616e-09	-2.99192e-10	-1.22703e-09
-7.5656e-10	-5.47533e-10	-6.60489e-10	-9.9832e-10	-6.47587e-10	-4.49633e-10	-1.76995e-09	-7.32641e-10	-7.31675e-10	-1.2896e-09	-7.08206e-10	-4.48796e-10	-2.63085e-10	-1.1098e-09	-6.38068e-10	-1.31761e-09	-5.59232e-10	-4.54616e-10	-5.46938e-10	-9.09749e-10	-2.89659e-10	-3.39791e-10	-1.87822e-09	-2.99378e-10	-1.2282e-09
-7.57188e-10	-5.48114e-10	-6.6101e-10	-9.9911e-10	-6.48123e-10	-4.50056e-10	-1.77148e-09	-7.33458e-10	-7.32101e-10	-1.29111e-09	-7.08659e-10	-4.4915e-10	-2.63402e-10	-1.1107e-09	-6.38662e-10	-1.31904e-09	-5.59756e-10	-4.55047e-10	-5.47503e-10	-9.10682e-10	-2.89935e-10	-3.4024e-10	-1.88031e-09	-2.99539e-10	-1.22934e-09
-7.57836e-10	-5.48719e-10	-6.61545e-10	-9.99905e-10	-6.48679e-10	-4.50489e-10	-1.77301e-09	-7.34267e-10	-7.32541e-10	-1.29261e-09	-7.09134e-10	-4.49523e-10	-2.63742e-10	-1.11165e-09	-6.39293e-10	-1.32048e-09	-5.6029e-10	-4.55507e-10	-5.48081e-10	-9.11615e-10	-2.90246e-10	-3.40721e-10	-1.88243e-09	-2.99724e-10	-1.23052e-09
-7.58504e-10	-5.49347e-10	-6.62093e-10	-1.00071e-09	-6.49257e-10	-4.50931e-10	-1.77453e-09	-7.35069e-10	-7.32994e-10	-1.2941e-09	-7.09632e-10	-4.49916e-10	-2.64104e-10	-1.11264e-09	-6.3996e-10	-1.32194e-09	-5.60835e-10	-4.55995e-10	-5.48673e-10	-9.12548e-10	-2.90592e-10	-3.41234e-10	-1.88457e-09	-2.99941e-10	-1.23174e-09
-7.59192e-10	-5.49998e-10	-6.62656e-10	-1.00151e-09	-6.49857e-10	-4.51381e-10	-1.77605e-09	-7.35864e-10	-7.33462e-10	-1.29558e-09	-7.10153e-10	-4.50328e-10	-2.64487e-10	-1.11369e-09	-6.40664e-10	-1.32341e-09	-5.61391e-10	-4.56511e-10	-5.49279e-10	-9.13481e-10	-2.90974e-10	-3.41778e-10	-1.88674e-09	-3.00191e-10	-1.23299e-09
-7.599e-10	-5.50673e-10	-6.63232e-10	-1.00232e-09	-6.50477e-10	-4.51841e-10	-1.77757e-09	-7.36652e-10	-7.33943e-10	-1.29705e-09	-7.10696e-10	-4.50759e-10	-2.64893e-10	-1.11478e-09	-6.41404e-10	-1.32489e-09	-5.61957e-10	-4.57054e-10	-5.49897e-10	-9.14414e-10	-2.91392e-10	-3.42355e-10	-1.88894e-09	-3.00473e-10	-1.23429e-09
-7.60628e-10	-5.51371e-10	-6.63822e-10	-1.00313e-09	-6.51118e-10	-4.5231e-10	-1.77909e-09	-7.37432e-10	-7.34438e-10	-1.29852e-09	-7.11261e-10	-4.5121e-10	-2.65322e-10	-1.11591e-09	-6.4218e-10	-1.32639e-09	-5.62534e-10	-4.57626e-10	-5.50529e-10	-9.15347e-10	-2.91845e-10	-3.42964e-10	-1.89117e-09	-3.00786e-10	-1.23562e-09
-7.61376e-10	-5.52093e-10	-6.64425e-10	-1.00395e-09	-6.5178e-10	-4.52788e-10	-1.78061e-09	-7.38205e-10	-7.34947e-10	-1.29997e-09	-7.11849e-10	-4.5168e-10	-2.65772e-10	-1.1171e-09	-6.42992e-10	-1.32791e-09	-5.63122e-10	-4.58226e-10	-5.51175e-10	-9.16297e-10	-2.92323e-10	-3.43603e-10	-1.89342e-09	-3.01132e-10	-1.23698e-09
-7.62143e-10	-5.52838e-10	-6.65043e-10	-1.00478e-09	-6.52464e-10	-4.53275e-10	-1.78213e-09	-7.3897e-10	-7.3547e-10	-1.30141e-09	-7.1246e-10	-4.52169e-10	-2.66235e-10	-1.11842e-09	-6.43814e-10	-1.32941e-09	-5.63738e-10	-4.58835e-10	-5.51821e-10	-9.174e-10	-2.92707e-10	-3.44204e-10	-1.8956e-09	-3.01501e-10	-1.23838e-09
-7.62916e-10	-5.53605e-10	-6.65668e-10	-1.0056e-09	-6.53161e-10	-4.53775e-10	-1.78365e-09	-7.39717e-10	-7.35988e-10	-1.30285e-09	-7.1309e-10	-4.52667e-10	-2.66635e-10	-1.1202e-09	-6.44545e-10	-1.33081e-09	-5.64515e-10	-4.5941e-10	-5.5246e-10	-9.18665e-10	-2.93085e-10	-3.44718e-10	-1.89789e-09	-3.01851e-10	-1.23977e-09
-7.63624e-10	-5.54431e-10	-6.66262e-10	-1.00639e-09	-6.53824e-10	-4.54304e-10	-1.78517e-09	-7.40421e-10	-7.36425e-10	-1.30429e-09	-7.13743e-10	-4.53107e-10	-2.66951e-10	-1.12225e-09	-6.45221e-10	-1.33215e-09	-5.65407e-10	-4.59976e-10	-5.53075e-10	-9.2e-10	-2.935e-10	-3.45195e-10	-1.9003e-09	-3.0217e-10	-1.24115e-09
-7.64375e-10	-5.55296e-10	-6.66815e-10	-1.00719e-09	-6.54423e-10	-4.54881e-10	-1.78678e-09	-7.41131e-10	-7.36802e-10	-1.30575e-09	-7.14388e-10	-4.5354e-10	-2.67227e-10	-1.1242e-09	-6.4583e-10	-1.33347e-09	-5.66228e-10	-4.6051e-10	-5.53692e-10	-9.21336e-10	-2.93885e-10	-3.45642e-10	-1.90268e-09	-3.02443e-10	-1.24253e-09
-7.65162e-10	-5.561e-10	-6.67355e-10	-1.00804e-09	-6.54999e-10	-4.55466e-10	-1.78857e-09	-7.41825e-10	-7.37143e-10	-1.30726e-09	-7.14976e-10	-4.53979e-10	-2.67519e-10	-1.12593e-09	-6.46361e-10	-1.3348e-09	-5.66974e-10	-4.61012e-10	-5.54248e-10	-9.22666e-10	-2.94236e-10	-3.46061e-10	-1.90504e-09	-3.02683e-10	-1.24393e-09
-7.65897e-10	-5.56943e-10	-6.67905e-10	-1.00892e-09	-6.55588e-10	-4.56051e-10	-1.79047e-09	-7.42552e-10	-7.37505e-10	-1.30867e-09	-7.15523e-10	-4.5439e-10	-2.67772e-10	-1.12742e-09	-6.46909e-10	-1.33611e-09	-5.67754e-10	-4.61511e-10	-5.54815e-10	-9.24002e-10	-2.94513e-10	-3.46445e-10	-1.90738e-09	-3.02882e-10	-1.2453e-09
-7.66595e-10	-5.57789e-10	-6.68468e-10	-1.00982e-09	-6.56171e-10	-4.566e-10	-1.79243e-09	-7.43407e-10	-7.37874e-10	-1.31006e-09	-7.16029e-10	-4.54793e-10	-2.67993e-10	-1.12874e-09	-6.47475e-10	-1.33741e-09	-5.68554e-10	-4.61997e-10	-5.55398e-10	-9.25439e-10	-2.94755e-10	-3.46815e-10	-1.90971e-09	-3.03049e-10	-1.24668e-09
-7.67296e-10	-5.58556e-10	-6.68991e-10	-1.01075e-09	-6.56732e-10	-4.57152e-10	-1.7944e-09	-7.44371e-10	-7.38233e-10	-1.31144e-09	-7.16522e-10	-4.55168e-10	-2.68213e-10	-1.13001e-09	-6.48067e-10	-1.33867e-09	-5.69186e-10	-4.62456e-10	-5.5597e-10	-9.26869e-10	-2.94948e-10	-3.47193e-10	-1.91195e-09	-3.032e-10	-1.24804e-09
-7.67999e-10	-5.59309e-10	-6.69424e-10	-1.01173e-09	-6.57288e-10	-4.57708e-10	-1.79639e-09	-7.45389e-10	-7.38583e-10	-1.3127e-09	-7.17e-10	-4.55521e-10	-2.68409e-10	-1.13123e-09	-6.48685e-10	-1.33987e-09	-5.69761e-10	-4.62912e-10	-5.56526e-10	-9.28211e-10	-2.95148e-10	-3.47572e-10	-1.91411e-09	-3.03348e-10	-1.24939e-09
-7.68685e-10	-5.60063e-10	-6.69826e-10	-1.0127e-09	-6.57835e-10	-4.58262e-10	-1.79833e-09	-7.46389e-10	-7.38921e-10	-1.31388e-09	-7.17427e-10	-4.5586e-10	-2.68596e-10	-1.13234e-09	-6.49271e-10	-1.34111e-09	-5.70313e-10	-4.6334e-10	-5.57051e-10	-9.29444e-10	-2.95409e-10	-3.47896e-10	-1.91629e-09	-3.03489e-10	-1.25073e-09
-7.69387e-10	-5.60766e-10	-6.70213e-10	-1.01367e-09	-6.58399e-10	-4.58811e-10	-1.80026e-09	-7.47372e-10	-7.39234e-10	-1.31499e-09	-7.17838e-10	-4.56204e-10	-2.68784e-10	-1.13328e-09	-6.49821e-10	-1.34236e-09	-5.70859e-10	-4.63749e-10	-5.57567e-10	-9.30614e-10	-2.95638e-10	-3.48189e-10	-1.91836e-09	-3.0362e-10	-1.25201e-09
-7.70137e-10	-5.61398e-10	-6.70617e-10	-1.01463e-09	-6.58932e-10	-4.5931e-10	-1.80215e-09	-7.48362e-10	-7.39501e-10	-1.3161e-09	-7.18262e-10	-4.5651e-10	-2.68954e-10	-1.13418e-09	-6.50405e-10	-1.34359e-09	-5.71449e-10	-4.64143e-10	-5.58054e-10	-9.31722e-10	-2.95825e-10	-3.48494e-10	-1.92043e-09	-3.03748e-10	-1.25324e-09
-7.70856e-10	-5.61992e-10	-6.70997e-10	-1.01558e-09	-6.59401e-10	-4.59786e-10	-1.80397e-09	-7.49378e-10	-7.39763e-10	-1.31722e-09	-7.18644e-10	-4.56802e-10	-2.69117e-10	-1.13502e-09	-6.50951e-10	-1.3449e-09	-5.71971e-10	-4.64529e-10	-5.5853e-10	-9.32772e-10	-2.96003e-10	-3.48791e-10	-1.92244e-09	-3.03868e-10	-1.25444e-09
-7.71528e-10	-5.62576e-10	-6.71339e-10	-1.01646e-09	-6.59834e-10	-4.60296e-10	-1.80569e-09	-7.50351e-10	-7.40031e-10	-1.31833e-09	-7.1904e-10	-4.57107e-10	-2.69324e-10	-1.13586e-09	-6.51489e-10	-1.34625e-09	-5.72458e-10	-4.64894e-10	-5.58986e-10	-9.33773e-10	-2.96201e-10	-3.49089e-10	-1.9244e-09	-3.03972e-10	-1.25567e-09
-7.72147e-10	-5.63108e-10	-6.7168e-10	-1.01729e-09	-6.6026e-10	-4.60817e-10	-1.80736e-09	-7.5125e-10	-7.40301e-10	-1.31942e-09	-7.19479e-10	-4.57429e-10	-2.69546e-10	-1.1367e-09	-6.51997e-10	-1.34755e-09	-5.72943e-10	-4.65261e-10	-5.59437e-10	-9.34694e-10	-2.96373e-10	-3.49379e-10	-1.92637e-09	-3.04057e-10	-1.25688e-09
-7.72775e-10	-5.63616e-10	-6.72028e-10	-1.01812e-09	-6.60708e-10	-4.61324e-10	-1.80902e-09	-7.52099e-10	-7.4059e-10	-1.32051e-09	-7.19936e-10	-4.57778e-10	-2.69773e-10	-1.13757e-09	-6.525e-10	-1.34884e-09	-5.73455e-10	-4.65624e-10	-5.5993e-10	-9.35606e-10	-2.96546e-10	-3.49689e-10	-1.92835e-09	-3.04135e-10	-1.25805e-09
-7.73431e-10	-5.64148e-10	-6.72389e-10	-1.01895e-09	-6.61188e-10	-4.61832e-10	-1.81068e-09	-7.52942e-10	-7.40897e-10	-1.3216e-09	-7.20412e-10	-4.58142e-10	-2.70012e-10	-1.13849e-09	-6.53032e-10	-1.35014e-09	-5.73975e-10	-4.66014e-10	-5.60442e-10	-9.36535e-10	-2.96754e-10	-3.50047e-10	-1.93038e-09	-3.04218e-10	-1.25917e-09
-7.74115e-10	-5.64708e-10	-6.72763e-10	-1.01978e-09	-6.617e-10	-4.62342e-10	-1.81232e-09	-7.53781e-10	-7.41218e-10	-1.32271e-09	-7.20906e-10	-4.58521e-10	-2.70263e-10	-1.13946e-09	-6.53594e-10	-1.35148e-09	-5.74502e-10	-4.66432e-10	-5.60971e-10	-9.37479e-10	-2.97e-10	-3.50452e-10	-1.93245e-09	-3.04308e-10	-1.26028e-09
-7.74827e-10	-5.65295e-10	-6.73152e-10	-1.0206e-09	-6.62244e-10	-4.62855e-10	-1.81396e-09	-7.54615e-10	-7.41557e-10	-1.32383e-09	-7.21419e-10	-4.58915e-10	-2.70526e-10	-1.14048e-09	-6.54186e-10	-1.35283e-09	-5.75034e-10	-4.66878e-10	-5.61518e-10	-9.3844e-10	-2.97283e-10	-3.50905e-10	-1.93456e-09	-3.04442e-10	-1.26139e-09
-7.75568e-10	-5.65909e-10	-6.73554e-10	-1.02143e-09	-6.62821e-10	-4.63371e-10	-1.81558e-09	-7.55445e-10	-7.41911e-10	-1.32497e-09	-7.21951e-10	-4.59325e-10	-2.70802e-10	-1.14155e-09	-6.54808e-10	-1.35421e-09	-5.75572e-10	-4.67353e-10	-5.62082e-10	-9.39417e-10	-2.97604e-10	-3.51406e-10	-1.93671e-09	-3.0462e-10	-1.26249e-09
-7.76336e-10	-5.6655e-10	-6.7397e-10	-1.02224e-09	-6.6343e-10	-4.63888e-10	-1.8172e-09	-7.56271e-10	-7.42281e-10	-1.32613e-09	-7.22502e-10	-4.5975e-10	-2.7109e-10	-1.14266e-09	-6.5546e-10	-1.35562e-09	-5.76116e-10	-4.67856e-10	-5.62664e-10	-9.40409e-10	-2.97961e-10	-3.51954e-10	-1.93889e-09	-3.04842e-10	-1.26361e-09
-7.77133e-10	-5.67218e-10	-6.74399e-10	-1.02306e-09	-6.64071e-10	-4.64408e-10	-1.8188e-09	-7.57093e-10	-7.42667e-10	-1.3273e-09	-7.23072e-10	-4.6019e-10	-2.7139e-10	-1.14382e-09	-6.56143e-10	-1.35705e-09	-5.76665e-10	-4.68388e-10	-5.63264e-10	-9.41417e-10	-2.98356e-10	-3.52551e-10	-1.94112e-09	-3.05106e-10	-1.26476e-09
-7.77957e-10	-5.67914e-10	-6.74843e-10	-1.02387e-09	-6.64745e-10	-4.64931e-10	-1.82039e-09	-7.57911e-10	-7.4307e-10	-1.32848e-09	-7.2366e-10	-4.60645e-10	-2.71703e-10	-1.14503e-09	-6.56855e-10	-1.3585e-09	-5.7722e-10	-4.68948e-10	-5.63881e-10	-9.42442e-10	-2.98788e-10	-3.53194e-10	-1.94339e-09	-3.05415e-10	-1.26593e-09
-7.7881e-10	-5.68636e-10	-6.753e-10	-1.02468e-09	-6.65451e-10	-4.65456e-10	-1.82197e-09	-7.58725e-10	-7.43488e-10	-1.32968e-09	-7.24268e-10	-4.61116e-10	-2.72027e-10	-1.14629e-09	-6.57598e-10	-1.35998e-09	-5.77781e-10	-4.69536e-10	-5.64516e-10	-9.43482e-10	-2.99257e-10	-3.53886e-10	-1.9457e-09	-3.05766e-10	-1.26714e-09
-7.79691e-10	-5.69386e-10	-6.75771e-10	-1.02549e-09	-6.6619e-10	-4.65984e-10	-1.82354e-09	-7.59534e-10	-7.43922e-10	-1.33089e-09	-7.24894e-10	-4.61602e-10	-2.72365e-10	-1.1476e-09	-6.5837e-10	-1.36148e-09	-5.78347e-10	-4.70153e-10	-5.65169e-10	-9.44536e-10	-2.99753e-10	-3.54622e-10	-1.94804e-09	-3.06161e-10	-1.26837e-09
-7.806e-10	-5.70163e-10	-6.76256e-10	-1.02629e-09	-6.6696e-10	-4.66514e-10	-1.8251e-09	-7.60339e-10	-7.44373e-10	-1.33211e-09	-7.2554e-10	-4.62103e-10	-2.72711e-10	-1.14899e-09	-6.59142e-10	-1.363e-09	-5.78947e-10	-4.70784e-10	-5.65813e-10	-9.45643e-10	-3.00144e-10	-3.55331e-10	-1.95029e-09	-3.06585e-10	-1.26964e-09
-7.81522e-10	-5.70973e-10	-6.76759e-10	-1.02709e-09	-6.67752e-10	-4.67056e-10	-1.82665e-09	-7.61138e-10	-7.44834e-10	-1.33335e-09	-7.26207e-10	-4.62618e-10	-2.73039e-10	-1.1506e-09	-6.59812e-10	-1.36453e-09	-5.79723e-10	-4.71365e-10	-5.66382e-10	-9.46931e-10	-3.0045e-10	-3.55913e-10	-1.95242e-09	-3.06904e-10	-1.2709e-09
-7.8238e-10	-5.71855e-10	-6.77292e-10	-1.02789e-09	-6.68493e-10	-4.67656e-10	-1.82825e-09	-7.61902e-10	-7.45379e-10	-1.33459e-09	-7.26889e-10	-4.63133e-10	-2.73346e-10	-1.1523e-09	-6.60465e-10	-1.36599e-09	-5.80561e-10	-4.71907e-10	-5.66908e-10	-9.48342e-10	-3.00781e-10	-3.56401e-10	-1.95454e-09	-3.07126e-10	-1.27219e-09
-7.83154e-10	-5.7278e-10	-6.77795e-10	-1.0287e-09	-6.69172e-10	-4.68259e-10	-1.8299e-09	-7.62651e-10	-7.46204e-10	-1.33576e-09	-7.27523e-10	-4.63606e-10	-2.73681e-10	-1.15385e-09	-6.61126e-10	-1.36732e-09	-5.81309e-10	-4.72453e-10	-5.6745e-10	-9.49808e-10	-3.01105e-10	-3.56851e-10	-1.9566e-09	-3.07289e-10	-1.27351e-09
-7.83951e-10	-5.73643e-10	-6.78266e-10	-1.02951e-09	-6.69795e-10	-4.68866e-10	-1.83159e-09	-7.63418e-10	-7.47141e-10	-1.33684e-09	-7.28123e-10	-4.64064e-10	-2.74025e-10	-1.15529e-09	-6.61715e-10	-1.36862e-09	-5.81975e-10	-4.72967e-10	-5.68031e-10	-9.51303e-10	-3.01367e-10	-3.57255e-10	-1.95865e-09	-3.07432e-10	-1.27482e-09
-7.84794e-10	-5.7446e-10	-6.78744e-10	-1.0303e-09	-6.70365e-10	-4.69472e-10	-1.83328e-09	-7.64257e-10	-7.48223e-10	-1.33791e-09	-7.28702e-10	-4.64534e-10	-2.74364e-10	-1.15666e-09	-6.62246e-10	-1.36992e-09	-5.82647e-10	-4.73443e-10	-5.68595e-10	-9.52752e-10	-3.01622e-10	-3.5762e-10	-1.96068e-09	-3.07562e-10	-1.27615e-09
-7.85602e-10	-5.75287e-10	-6.79243e-10	-1.0311e-09	-6.7093e-10	-4.70034e-10	-1.83504e-09	-7.65152e-10	-7.49441e-10	-1.33895e-09	-7.29307e-10	-4.65021e-10	-2.74687e-10	-1.15801e-09	-6.62739e-10	-1.37116e-09	-5.8334e-10	-4.73903e-10	-5.69112e-10	-9.54078e-10	-3.01853e-10	-3.57977e-10	-1.96264e-09	-3.07679e-10	-1.27748e-09
-7.86352e-10	-5.76074e-10	-6.79716e-10	-1.0319e-09	-6.7153e-10	-4.70555e-10	-1.83691e-09	-7.66131e-10	-7.50717e-10	-1.34003e-09	-7.29951e-10	-4.65503e-10	-2.75033e-10	-1.15936e-09	-6.6322e-10	-1.37244e-09	-5.84179e-10	-4.74335e-10	-5.69604e-10	-9.55277e-10	-3.02062e-10	-3.58299e-10	-1.96459e-09	-3.07806e-10	-1.27876e-09
-7.87041e-10	-5.76773e-10	-6.80158e-10	-1.0327e-09	-6.72145e-10	-4.71038e-10	-1.83882e-09	-7.67133e-10	-7.51954e-10	-1.34114e-09	-7.30603e-10	-4.65936e-10	-2.75365e-10	-1.16073e-09	-6.63673e-10	-1.37373e-09	-5.85041e-10	-4.74752e-10	-5.70106e-10	-9.56452e-10	-3.02238e-10	-3.58602e-10	-1.9666e-09	-3.0792e-10	-1.28005e-09
-7.87751e-10	-5.77414e-10	-6.80564e-10	-1.03351e-09	-6.72759e-10	-4.71499e-10	-1.84061e-09	-7.68151e-10	-7.53124e-10	-1.34225e-09	-7.31243e-10	-4.66313e-10	-2.75694e-10	-1.16209e-09	-6.64095e-10	-1.37495e-09	-5.85771e-10	-4.75176e-10	-5.70634e-10	-9.57578e-10	-3.02416e-10	-3.58887e-10	-1.96851e-09	-3.08026e-10	-1.28137e-09
-7.88465e-10	-5.78019e-10	-6.80923e-10	-1.03429e-09	-6.7339e-10	-4.7197e-10	-1.84232e-09	-7.69192e-10	-7.54192e-10	-1.34328e-09	-7.31826e-10	-4.66648e-10	-2.76026e-10	-1.16338e-09	-6.64559e-10	-1.37615e-09	-5.86414e-10	-4.75569e-10	-5.71163e-10	-9.58646e-10	-3.02572e-10	-3.59181e-10	-1.97034e-09	-3.08136e-10	-1.28267e-09
-7.89182e-10	-5.78595e-10	-6.81291e-10	-1.03503e-09	-6.74002e-10	-4.72447e-10	-1.844e-09	-7.70204e-10	-7.55172e-10	-1.3443e-09	-7.32367e-10	-4.66977e-10	-2.76335e-10	-1.16456e-09	-6.65046e-10	-1.37732e-09	-5.87123e-10	-4.75962e-10	-5.71651e-10	-9.59688e-10	-3.02696e-10	-3.59488e-10	-1.97224e-09	-3.08233e-10	-1.28391e-09
-7.89933e-10	-5.79175e-10	-6.81717e-10	-1.03575e-09	-6.74544e-10	-4.72913e-10	-1.84564e-09	-7.71203e-10	-7.56095e-10	-1.34537e-09	-7.32922e-10	-4.67268e-10	-2.7662e-10	-1.16566e-09	-6.65514e-10	-1.37842e-09	-5.878e-10	-4.7634e-10	-5.72134e-10	-9.607e-10	-3.02814e-10	-3.59783e-10	-1.9742e-09	-3.08349e-10	-1.28515e-09
-7.90666e-10	-5.79779e-10	-6.82153e-10	-1.03644e-09	-6.75046e-10	-4.73356e-10	-1.84722e-09	-7.72157e-10	-7.56919e-10	-1.34643e-09	-7.33465e-10	-4.67526e-10	-2.76873e-10	-1.16665e-09	-6.66009e-10	-1.37954e-09	-5.8843e-10	-4.76711e-10	-5.72637e-10	-9.61661e-10	-3.02933e-10	-3.60084e-10	-1.97617e-09	-3.08495e-10	-1.28637e-09
-7.91387e-10	-5.80365e-10	-6.82541e-10	-1.03712e-09	-6.75561e-10	-4.7376e-10	-1.84877e-09	-7.73094e-10	-7.5762e-10	-1.34745e-09	-7.33987e-10	-4.67817e-10	-2.77102e-10	-1.16756e-09	-6.66488e-10	-1.38064e-09	-5.89025e-10	-4.77094e-10	-5.73156e-10	-9.62599e-10	-3.03035e-10	-3.60405e-10	-1.97816e-09	-3.08629e-10	-1.28756e-09
-7.92119e-10	-5.80939e-10	-6.82912e-10	-1.03782e-09	-6.76085e-10	-4.74163e-10	-1.85028e-09	-7.74e-10	-7.58264e-10	-1.34846e-09	-7.345e-10	-4.68159e-10	-2.77324e-10	-1.16846e-09	-6.66977e-10	-1.38176e-09	-5.89622e-10	-4.77493e-10	-5.73689e-10	-9.63541e-10	-3.03163e-10	-3.6074e-10	-1.98015e-09	-3.08758e-10	-1.28877e-09
-7.92855e-10	-5.81529e-10	-6.83296e-10	-1.03852e-09	-6.76622e-10	-4.7457e-10	-1.8518e-09	-7.74885e-10	-7.58907e-10	-1.3495e-09	-7.35015e-10	-4.68529e-10	-2.77553e-10	-1.16943e-09	-6.67493e-10	-1.38292e-09	-5.90216e-10	-4.77917e-10	-5.74226e-10	-9.6448e-10	-3.03324e-10	-3.61113e-10	-1.98218e-09	-3.08871e-10	-1.28999e-09
-7.93595e-10	-5.82135e-10	-6.83694e-10	-1.03923e-09	-6.77174e-10	-4.74983e-10	-1.85333e-09	-7.75751e-10	-7.59552e-10	-1.35058e-09	-7.35533e-10	-4.68924e-10	-2.7779e-10	-1.17046e-09	-6.68035e-10	-1.38411e-09	-5.90805e-10	-4.78366e-10	-5.74768e-10	-9.65419e-10	-3.03518e-10	-3.61525e-10	-1.98424e-09	-3.08984e-10	-1.29119e-09
-7.94337e-10	-5.82758e-10	-6.84105e-10	-1.03995e-09	-6.77742e-10	-4.75401e-10	-1.85486e-09	-7.76596e-10	-7.60198e-10	-1.35169e-09	-7.36054e-10	-4.69344e-10	-2.78037e-10	-1.17156e-09	-6.68603e-10	-1.38533e-09	-5.9139e-10	-4.7884e-10	-5.75314e-10	-9.66357e-10	-3.03743e-10	-3.61977e-10	-1.98634e-09	-3.09114e-10	-1.2924e-09
-7.95084e-10	-5.83397e-10	-6.84532e-10	-1.04068e-09	-6.78324e-10	-4.75825e-10	-1.8564e-09	-7.77422e-10	-7.60846e-10	-1.35285e-09	-7.36578e-10	-4.69788e-10	-2.78292e-10	-1.17272e-09	-6.69198e-10	-1.38657e-09	-5.91971e-10	-4.79341e-10	-5.75865e-10	-9.67294e-10	-3.04001e-10	-3.62468e-10	-1.98848e-09	-3.09277e-10	-1.29359e-09
-7.95833e-10	-5.84053e-10	-6.84972e-10	-1.04142e-09	-6.7892e-10	-4.76253e-10	-1.85796e-09	-7.78228e-10	-7.61495e-10	-1.35403e-09	-7.37105e-10	-4.70258e-10	-2.78557e-10	-1.17394e-09	-6.69819e-10	-1.38786e-09	-5.92548e-10	-4.79867e-10	-5.76421e-10	-9.68231e-10	-3.04291e-10	-3.62998e-10	-1.99065e-09	-3.09473e-10	-1.29479e-09
-7.96585e-10	-5.84726e-10	-6.85427e-10	-1.04217e-09	-6.79532e-10	-4.76687e-10	-1.85952e-09	-7.79014e-10	-7.62147e-10	-1.35526e-09	-7.37634e-10	-4.70753e-10	-2.7883e-10	-1.17523e-09	-6.70467e-10	-1.38917e-09	-5.9312e-10	-4.80418e-10	-5.76981e-10	-9.69168e-10	-3.04613e-10	-3.63567e-10	-1.99287e-09	-3.09704e-10	-1.29602e-09
-7.97341e-10	-5.85415e-10	-6.85895e-10	-1.04293e-09	-6.80158e-10	-4.77125e-10	-1.86108e-09	-7.7978e-10	-7.62799e-10	-1.35652e-09	-7.38167e-10	-4.71272e-10	-2.79112e-10	-1.17658e-09	-6.7114e-10	-1.39051e-09	-5.93688e-10	-4.80995e-10	-5.77545e-10	-9.70103e-10	-3.04968e-10	-3.64175e-10	-1.99511e-09	-3.09969e-10	-1.29728e-09
-7.981e-10	-5.8612e-10	-6.86378e-10	-1.0437e-09	-6.80799e-10	-4.77569e-10	-1.86266e-09	-7.80526e-10	-7.63454e-10	-1.35781e-09	-7.38702e-10	-4.71816e-10	-2.79403e-10	-1.17799e-09	-6.71841e-10	-1.39188e-09	-5.94252e-10	-4.81598e-10	-5.78114e-10	-9.71038e-10	-3.05355e-10	-3.64822e-10	-1.9974e-09	-3.10268e-10	-1.29856e-09
-7.98863e-10	-5.86842e-10	-6.86875e-10	-1.04448e-09	-6.81455e-10	-4.78018e-10	-1.86425e-09	-7.81252e-10	-7.64111e-10	-1.35914e-09	-7.3924e-10	-4.72385e-10	-2.79702e-10	-1.17947e-09	-6.72567e-10	-1.39329e-09	-5.94811e-10	-4.82226e-10	-5.78687e-10	-9.7198e-10	-3.05766e-10	-3.65508e-10	-1.99971e-09	-3.10601e-10	-1.29987e-09
-7.99628e-10	-5.87581e-10	-6.87386e-10	-1.04527e-09	-6.82126e-10	-4.78472e-10	-1.86584e-09	-7.81958e-10	-7.64769e-10	-1.36051e-09	-7.39781e-10	-4.7298e-10	-2.80005e-10	-1.18104e-09	-6.73308e-10	-1.39471e-09	-5.95366e-10	-4.82859e-10	-5.79264e-10	-9.73035e-10	-3.06087e-10	-3.66154e-10	-2.00183e-09	-3.10958e-10	-1.30119e-09
-8.00394e-10	-5.88338e-10	-6.8791e-10	-1.04606e-09	-6.82801e-10	-4.78928e-10	-1.86745e-09	-7.8264e-10	-7.65422e-10	-1.36192e-09	-7.4032e-10	-4.73585e-10	-2.80264e-10	-1.18279e-09	-6.74008e-10	-1.39619e-09	-5.9597e-10	-4.83443e-10	-5.79823e-10	-9.7422e-10	-3.06364e-10	-3.66688e-10	-2.00386e-09	-3.11239e-10	-1.30251e-09
-8.0114e-10	-5.89114e-10	-6.88421e-10	-1.04679e-09	-6.83415e-10	-4.79374e-10	-1.86903e-09	-7.83289e-10	-7.66039e-10	-1.36334e-09	-7.4084e-10	-4.74126e-10	-2.8048e-10	-1.18458e-09	-6.74617e-10	-1.39777e-09	-5.96629e-10	-4.84001e-10	-5.80333e-10	-9.75505e-10	-3.0661e-10	-3.67181e-10	-2.00581e-09	-3.11472e-10	-1.30387e-09
-8.0188e-10	-5.89908e-10	-6.88911e-10	-1.04747e-09	-6.83988e-10	-4.79899e-10	-1.87053e-09	-7.83962e-10	-7.66596e-10	-1.36474e-09	-7.41348e-10	-4.74589e-10	-2.80696e-10	-1.18628e-09	-6.75164e-10	-1.39936e-09	-5.97296e-10	-4.84545e-10	-5.80843e-10	-9.76898e-10	-3.06865e-10	-3.67642e-10	-2.00781e-09	-3.11657e-10	-1.3053e-09
-8.02628e-10	-5.90705e-10	-6.89382e-10	-1.04814e-09	-6.8455e-10	-4.80512e-10	-1.87203e-09	-7.84656e-10	-7.67084e-10	-1.36608e-09	-7.41837e-10	-4.7498e-10	-2.80934e-10	-1.18786e-09	-6.75744e-10	-1.4009e-09	-5.97893e-10	-4.85056e-10	-5.81297e-10	-9.78387e-10	-3.07094e-10	-3.68054e-10	-2.00994e-09	-3.11827e-10	-1.30677e-09
-8.03385e-10	-5.91522e-10	-6.89852e-10	-1.04882e-09	-6.85107e-10	-4.81128e-10	-1.87357e-09	-7.85471e-10	-7.67531e-10	-1.36738e-09	-7.42298e-10	-4.7531e-10	-2.81206e-10	-1.18936e-09	-6.76297e-10	-1.40243e-09	-5.98519e-10	-4.85512e-10	-5.8178e-10	-9.79903e-10	-3.07273e-10	-3.6844e-10	-2.01213e-09	-3.11973e-10	-1.30817e-09
-8.04121e-10	-5.9231e-10	-6.90364e-10	-1.04953e-09	-6.85636e-10	-4.81716e-10	-1.87527e-09	-7.86349e-10	-7.67949e-10	-1.36862e-09	-7.4276e-10	-4.75602e-10	-2.81528e-10	-1.19074e-09	-6.76802e-10	-1.40393e-09	-5.99167e-10	-4.85973e-10	-5.82298e-10	-9.81371e-10	-3.07434e-10	-3.68818e-10	-2.01432e-09	-3.12123e-10	-1.30953e-09
-8.04817e-10	-5.93017e-10	-6.90863e-10	-1.05031e-09	-6.86156e-10	-4.82293e-10	-1.87706e-09	-7.87254e-10	-7.68374e-10	-1.36979e-09	-7.43209e-10	-4.75904e-10	-2.8187e-10	-1.19198e-09	-6.77331e-10	-1.40535e-09	-5.99742e-10	-4.86454e-10	-5.82811e-10	-9.82705e-10	-3.07598e-10	-3.69138e-10	-2.01645e-09	-3.12272e-10	-1.3109e-09
-8.05528e-10	-5.93696e-10	-6.91321e-10	-1.05119e-09	-6.86711e-10	-4.82865e-10	-1.87879e-09	-7.88173e-10	-7.68811e-10	-1.37087e-09	-7.43653e-10	-4.76237e-10	-2.8221e-10	-1.19315e-09	-6.7786e-10	-1.40663e-09	-6.00277e-10	-4.86913e-10	-5.8332e-10	-9.8395e-10	-3.07738e-10	-3.69431e-10	-2.01871e-09	-3.12403e-10	-1.31234e-09
-8.06244e-10	-5.94324e-10	-6.91729e-10	-1.05209e-09	-6.87297e-10	-4.83426e-10	-1.88046e-09	-7.89125e-10	-7.69226e-10	-1.37186e-09	-7.44096e-10	-4.76556e-10	-2.82531e-10	-1.19435e-09	-6.7839e-10	-1.40783e-09	-6.00796e-10	-4.87339e-10	-5.83778e-10	-9.85107e-10	-3.07889e-10	-3.69715e-10	-2.02093e-09	-3.1254e-10	-1.31378e-09
-8.06961e-10	-5.94893e-10	-6.92089e-10	-1.05293e-09	-6.87865e-10	-4.84017e-10	-1.88213e-09	-7.90155e-10	-7.69593e-10	-1.37281e-09	-7.44521e-10	-4.7686e-10	-2.82808e-10	-1.19558e-09	-6.78928e-10	-1.40903e-09	-6.01329e-10	-4.8775e-10	-5.8419e-10	-9.86175e-10	-3.08046e-10	-3.69993e-10	-2.02309e-09	-3.1268e-10	-1.31515e-09
-8.07676e-10	-5.95449e-10	-6.92408e-10	-1.05376e-09	-6.88397e-10	-4.84571e-10	-1.8837e-09	-7.91227e-10	-7.69904e-10	-1.3738e-09	-7.449e-10	-4.77144e-10	-2.83037e-10	-1.19677e-09	-6.794e-10	-1.41025e-09	-6.01862e-10	-4.88167e-10	-5.84594e-10	-9.87195e-10	-3.08192e-10	-3.70246e-10	-2.02509e-09	-3.12822e-10	-1.31648e-09
-8.08347e-10	-5.96052e-10	-6.927e-10	-1.05463e-09	-6.88944e-10	-4.8507e-10	-1.88527e-09	-7.92274e-10	-7.70214e-10	-1.37483e-09	-7.45239e-10	-4.7741e-10	-2.83244e-10	-1.19786e-09	-6.79804e-10	-1.41144e-09	-6.02394e-10	-4.88592e-10	-5.8499e-10	-9.88221e-10	-3.08346e-10	-3.7049e-10	-2.02699e-09	-3.12953e-10	-1.31778e-09
-8.08967e-10	-5.96681e-10	-6.93018e-10	-1.05545e-09	-6.89511e-10	-4.85546e-10	-1.8868e-09	-7.93239e-10	-7.70517e-10	-1.37582e-09	-7.45636e-10	-4.77664e-10	-2.83443e-10	-1.19885e-09	-6.80253e-10	-1.41268e-09	-6.02974e-10	-4.89007e-10	-5.85354e-10	-9.89321e-10	-3.08484e-10	-3.70745e-10	-2.02881e-09	-3.13091e-10	-1.31907e-09
-8.09575e-10	-5.97262e-10	-6.93455e-10	-1.0562e-09	-6.90052e-10	-4.8599e-10	-1.88831e-09	-7.94155e-10	-7.70832e-10	-1.37677e-09	-7.46042e-10	-4.77936e-10	-2.83647e-10	-1.19981e-09	-6.80787e-10	-1.414e-09	-6.03551e-10	-4.89413e-10	-5.85726e-10	-9.90497e-10	-3.08615e-10	-3.70996e-10	-2.03066e-09	-3.13234e-10	-1.32041e-09
-8.10168e-10	-5.97814e-10	-6.93948e-10	-1.0569e-09	-6.90591e-10	-4.86417e-10	-1.8898e-09	-7.95054e-10	-7.71183e-10	-1.37771e-09	-7.46454e-10	-4.7824e-10	-2.83861e-10	-1.20083e-09	-6.81381e-10	-1.41532e-09	-6.04102e-10	-4.89817e-10	-5.86094e-10	-9.91663e-10	-3.08751e-10	-3.71276e-10	-2.03252e-09	-3.13382e-10	-1.32175e-09
-8.10786e-10	-5.98389e-10	-6.94442e-10	-1.05761e-09	-6.91159e-10	-4.86845e-10	-1.8913e-09	-7.95946e-10	-7.71564e-10	-1.37867e-09	-7.46882e-10	-4.78578e-10	-2.84091e-10	-1.20188e-09	-6.82e-10	-1.41665e-09	-6.04665e-10	-4.90244e-10	-5.86494e-10	-9.92816e-10	-3.08918e-10	-3.71601e-10	-2.03441e-09	-3.13554e-10	-1.32304e-09
-8.11431e-10	-5.98989e-10	-6.94935e-10	-1.05833e-09	-6.91758e-10	-4.87275e-10	-1.89281e-09	-7.96831e-10	-7.71974e-10	-1.37965e-09	-7.47326e-10	-4.7895e-10	-2.84335e-10	-1.20295e-09	-6.82642e-10	-1.418e-09	-6.05241e-10	-4.90696e-10	-5.86927e-10	-9.93957e-10	-3.09115e-10	-3.71972e-10	-2.03631e-09	-3.13722e-10	-1.32431e-09
-8.12102e-10	-5.99615e-10	-6.95427e-10	-1.05905e-09	-6.92388e-10	-4.87707e-10	-1.89433e-09	-7.97711e-10	-7.72412e-10	-1.38065e-09	-7.47786e-10	-4.79356e-10	-2.84595e-10	-1.20404e-09	-6.83306e-10	-1.41937e-09	-6.05829e-10	-4.91173e-10	-5.87394e-10	-9.95087e-10	-3.09342e-10	-3.72389e-10	-2.03823e-09	-3.13899e-10	-1.32554e-09
-8.12799e-10	-6.00266e-10	-6.95918e-10	-1.05979e-09	-6.93047e-10	-4.88141e-10	-1.89587e-09	-7.98584e-10	-7.7288e-10	-1.38167e-09	-7.48261e-10	-4.79796e-10	-2.8487e-10	-1.20515e-09	-6.83994e-10	-1.42074e-09	-6.0643e-10	-4.91675e-10	-5.87895e-10	-9.96204e-10	-3.09599e-10	-3.72851e-10	-2.04018e-09	-3.14109e-10	-1.32678e-09
-8.13523e-10	-6.00943e-10	-6.96407e-10	-1.06054e-09	-6.93738e-10	-4.88576e-10	-1.89742e-09	-7.99451e-10	-7.73376e-10	-1.38271e-09	-7.48753e-10	-4.80269e-10	-2.8516e-10	-1.20629e-09	-6.84705e-10	-1.42213e-09	-6.07043e-10	-4.92201e-10	-5.88429e-10	-9.9731e-10	-3.09887e-10	-3.7336e-10	-2.04214e-09	-3.14357e-10	-1.32804e-09
-8.14273e-10	-6.01645e-10	-6.96895e-10	-1.0613e-09	-6.94458e-10	-4.89013e-10	-1.89898e-09	-8.00311e-10	-7.739e-10	-1.38377e-09	-7.49261e-10	-4.80776e-10	-2.85466e-10	-1.20744e-09	-6.85438e-10	-1.42354e-09	-6.07669e-10	-4.92753e-10	-5.88997e-10	-9.98403e-10	-3.10204e-10	-3.73914e-10	-2.04413e-09	-3.14643e-10	-1.32933e-09
-8.1505e-10	-6.02372e-10	-6.97383e-10	-1.06207e-09	-6.9521e-10	-4.89452e-10	-1.90055e-09	-8.01165e-10	-7.74454e-10	-1.38485e-09	-7.49785e-10	-4.81317e-10	-2.85787e-10	-1.20863e-09	-6.86195e-10	-1.42495e-09	-6.08308e-10	-4.93329e-10	-5.89598e-10	-9.99485e-10	-3.10553e-10	-3.74515e-10	-2.04613e-09	-3.14968e-10	-1.33063e-09
-8.15853e-10	-6.03125e-10	-6.97869e-10	-1.06286e-09	-6.95991e-10	-4.89893e-10	-1.90213e-09	-8.02013e-10	-7.75036e-10	-1.38595e-09	-7.50326e-10	-4.81892e-10	-2.86123e-10	-1.20983e-09	-6.86974e-10	-1.42639e-09	-6.08959e-10	-4.9393e-10	-5.90233e-10	-1.00055e-09	-3.10931e-10	-3.75161e-10	-2.04816e-09	-3.1533e-10	-1.33196e-09
-8.16683e-10	-6.03903e-10	-6.98354e-10	-1.06365e-09	-6.96803e-10	-4.90336e-10	-1.90373e-09	-8.02855e-10	-7.75647e-10	-1.38707e-09	-7.50882e-10	-4.82501e-10	-2.86474e-10	-1.21106e-09	-6.87776e-10	-1.42783e-09	-6.09623e-10	-4.94556e-10	-5.90902e-10	-1.00162e-09	-3.11333e-10	-3.75849e-10	-2.0502e-09	-3.1573e-10	-1.3333e-09
-8.17539e-10	-6.04706e-10	-6.98837e-10	-1.06445e-09	-6.97646e-10	-4.9078e-10	-1.90534e-09	-8.03691e-10	-7.76287e-10	-1.38821e-09	-7.51454e-10	-4.83144e-10	-2.86837e-10	-1.21237e-09	-6.88584e-10	-1.42928e-09	-6.10301e-10	-4.95195e-10	-5.91593e-10	-1.00276e-09	-3.11628e-10	-3.76453e-10	-2.05214e-09	-3.16159e-10	-1.33466e-09
-8.18424e-10	-6.05544e-10	-6.9932e-10	-1.06526e-09	-6.9851e-10	-4.91229e-10	-1.90696e-09	-8.04516e-10	-7.76943e-10	-1.38937e-09	-7.52046e-10	-4.83819e-10	-2.87196e-10	-1.21398e-09	-6.89277e-10	-1.43072e-09	-6.11063e-10	-4.95778e-10	-5.92243e-10	-1.00401e-09	-3.11821e-10	-3.76925e-10	-2.05399e-09	-3.16505e-10	-1.33601e-09
-8.19325e-10	-6.06445e-10	-6.99815e-10	-1.06606e-09	-6.9931e-10	-4.91744e-10	-1.90864e-09	-8.05303e-10	-7.77517e-10	-1.3905e-09	-7.5267e-10	-4.845e-10	-2.87536e-10	-1.21556e-09	-6.89829e-10	-1.43224e-09	-6.11897e-10	-4.96302e-10	-5.9282e-10	-1.00541e-09	-3.11977e-10	-3.7734e-10	-2.05596e-09	-3.1675e-10	-1.33735e-09
-8.20189e-10	-6.07368e-10	-7.00323e-10	-1.06691e-09	-7.00028e-10	-4.92349e-10	-1.91043e-09	-8.06066e-10	-7.77985e-10	-1.39158e-09	-7.53271e-10	-4.85117e-10	-2.87815e-10	-1.21699e-09	-6.90323e-10	-1.43386e-09	-6.12703e-10	-4.96794e-10	-5.93374e-10	-1.00689e-09	-3.12113e-10	-3.77698e-10	-2.05812e-09	-3.16932e-10	-1.33872e-09
-8.2107e-10	-6.08299e-10	-7.00805e-10	-1.06774e-09	-7.00687e-10	-4.92958e-10	-1.91226e-09	-8.06853e-10	-7.78366e-10	-1.39265e-09	-7.53834e-10	-4.85643e-10	-2.88101e-10	-1.21837e-09	-6.90811e-10	-1.43546e-09	-6.13435e-10	-4.97278e-10	-5.94015e-10	-1.00833e-09	-3.12248e-10	-3.78051e-10	-2.0603e-09	-3.17083e-10	-1.34013e-09
-8.21949e-10	-6.09183e-10	-7.01236e-10	-1.06851e-09	-7.01303e-10	-4.9355e-10	-1.91408e-09	-8.07697e-10	-7.78681e-10	-1.39365e-09	-7.54348e-10	-4.86152e-10	-2.88389e-10	-1.21976e-09	-6.91271e-10	-1.43708e-09	-6.1413e-10	-4.97752e-10	-5.94675e-10	-1.00959e-09	-3.12367e-10	-3.78405e-10	-2.0625e-09	-3.17231e-10	-1.34149e-09
-8.2278e-10	-6.10012e-10	-7.01654e-10	-1.06927e-09	-7.01879e-10	-4.94123e-10	-1.91591e-09	-8.08563e-10	-7.78985e-10	-1.39468e-09	-7.54861e-10	-4.86654e-10	-2.8865e-10	-1.22108e-09	-6.91718e-10	-1.43864e-09	-6.148e-10	-4.98244e-10	-5.95375e-10	-1.01076e-09	-3.12458e-10	-3.78753e-10	-2.06474e-09	-3.17382e-10	-1.34283e-09
-8.23602e-10	-6.10785e-10	-7.02074e-10	-1.07004e-09	-7.02416e-10	-4.94653e-10	-1.91773e-09	-8.09486e-10	-7.79281e-10	-1.39574e-09	-7.55384e-10	-4.87128e-10	-2.88917e-10	-1.22229e-09	-6.92137e-10	-1.44017e-09	-6.15473e-10	-4.98714e-10	-5.96051e-10	-1.01189e-09	-3.12548e-10	-3.79136e-10	-2.06692e-09	-3.17518e-10	-1.34414e-09
-8.24374e-10	-6.1149e-10	-7.02505e-10	-1.07087e-09	-7.02914e-10	-4.95128e-10	-1.91957e-09	-8.10476e-10	-7.79602e-10	-1.39683e-09	-7.55906e-10	-4.87577e-10	-2.89242e-10	-1.22346e-09	-6.92541e-10	-1.44165e-09	-6.16151e-10	-4.99149e-10	-5.96718e-10	-1.01295e-09	-3.12636e-10	-3.79526e-10	-2.06902e-09	-3.17641e-10	-1.34542e-09
-8.25073e-10	-6.12153e-10	-7.02905e-10	-1.07175e-09	-7.0338e-10	-4.95576e-10	-1.92143e-09	-8.11488e-10	-7.79967e-10	-1.39794e-09	-7.56423e-10	-4.88011e-10	-2.8956e-10	-1.22457e-09	-6.92909e-10	-1.44307e-09	-6.16799e-10	-4.99589e-10	-5.97353e-10	-1.01401e-09	-3.1273e-10	-3.79922e-10	-2.07106e-09	-3.17754e-10	-1.34667e-09
-8.2581e-10	-6.12834e-10	-7.03263e-10	-1.07262e-09	-7.03813e-10	-4.96029e-10	-1.92323e-09	-8.12511e-10	-7.80345e-10	-1.39903e-09	-7.56902e-10	-4.88438e-10	-2.8985e-10	-1.22568e-09	-6.93318e-10	-1.44445e-09	-6.17376e-10	-5.00057e-10	-5.97927e-10	-1.0151e-09	-3.12899e-10	-3.80284e-10	-2.07307e-09	-3.17851e-10	-1.34791e-09
-8.26602e-10	-6.13501e-10	-7.03608e-10	-1.07349e-09	-7.04234e-10	-4.96506e-10	-1.92501e-09	-8.13545e-10	-7.80708e-10	-1.40015e-09	-7.57345e-10	-4.88856e-10	-2.90107e-10	-1.22674e-09	-6.93771e-10	-1.44587e-09	-6.17902e-10	-5.00508e-10	-5.98463e-10	-1.01614e-09	-3.13111e-10	-3.80613e-10	-2.07509e-09	-3.17946e-10	-1.34914e-09
-8.27383e-10	-6.14122e-10	-7.03929e-10	-1.07427e-09	-7.04679e-10	-4.96966e-10	-1.92684e-09	-8.14543e-10	-7.81063e-10	-1.4013e-09	-7.57754e-10	-4.89237e-10	-2.90358e-10	-1.22781e-09	-6.94339e-10	-1.44726e-09	-6.18375e-10	-5.00926e-10	-5.98999e-10	-1.01711e-09	-3.13308e-10	-3.80924e-10	-2.077e-09	-3.18029e-10	-1.35034e-09
-8.28194e-10	-6.14694e-10	-7.04277e-10	-1.075e-09	-7.05147e-10	-4.97416e-10	-1.92864e-09	-8.15479e-10	-7.814e-10	-1.40241e-09	-7.5814e-10	-4.89598e-10	-2.90644e-10	-1.22883e-09	-6.94871e-10	-1.4486e-09	-6.18823e-10	-5.01339e-10	-5.99527e-10	-1.01807e-09	-3.13478e-10	-3.81226e-10	-2.07882e-09	-3.1811e-10	-1.3515e-09
-8.28959e-10	-6.15196e-10	-7.04658e-10	-1.07574e-09	-7.05664e-10	-4.9786e-10	-1.93037e-09	-8.16326e-10	-7.81709e-10	-1.40342e-09	-7.58562e-10	-4.89956e-10	-2.90897e-10	-1.22976e-09	-6.9534e-10	-1.44996e-09	-6.19235e-10	-5.01713e-10	-6.00062e-10	-1.01908e-09	-3.13651e-10	-3.8151e-10	-2.08059e-09	-3.18201e-10	-1.35268e-09
[truncated: 23,127 more rows]
[truncated: 6 more columns]

## Sheet: Figure 6
	Snap25 + Syt1-pHlourin
1	922.267	781.705	383.867	690.29	451.25	189.604	390.079
2	464.5	560.628	346.729	649.631	386.056	154.482	371.243
3	926.5	703.859	283.003	614.985	436.241	145.598	345.382
4	1730.04	801.241	817.04	652.017	551.447	488.411	482.318
5	2736.58	1635.72	1078.41	828.555	765.941	711.965	759.609
[truncated: 235 more rows]
